# Supplementary material
Source: MDPI journal article supplement (https://www.mdpi.com/2306-5729/7/11/150)

## **Supplementary Materials**

**Title: Manual conversion of Sadhukarn to Thai and Western Music Notations and Their Translation into a Rhyme structure for music analysis.**

**Sumetus Eambangyung <sup>1\*</sup>, Gretel Schwörer – Kohl <sup>1</sup> and Witoon Purahong <sup>2</sup>**

<sup>1</sup> Institut für Musik, Medien- und Sprechwissenschaften (IMMS) Abteilung  
Musikwissenschaft, Martin – Luther – Universität Halle – Wittenberg, 06099 Halle (Saale),  
Germany

<sup>2</sup> Department of Soil Ecology, UFZ-Helmholtz Centre for Environmental Research,  
D-06120 Halle (Saale), Germany

\* Author to whom correspondence should be addressed.

**Supplementary File S3: Rhyme structure of Sadhukarn main melody  
collected in Thailand, Cambodia, and Laos.**

Thai Fine Arts Department [TF]: Rhyming Structure: Section A [Phrase (P) 0 – 16]

A – 0: Introduction (P0 )

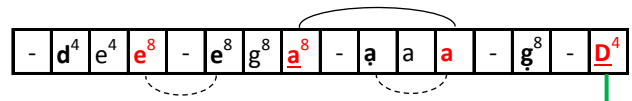

A – 1: Opening phrase (P1) + Theme I (P2 – 4)

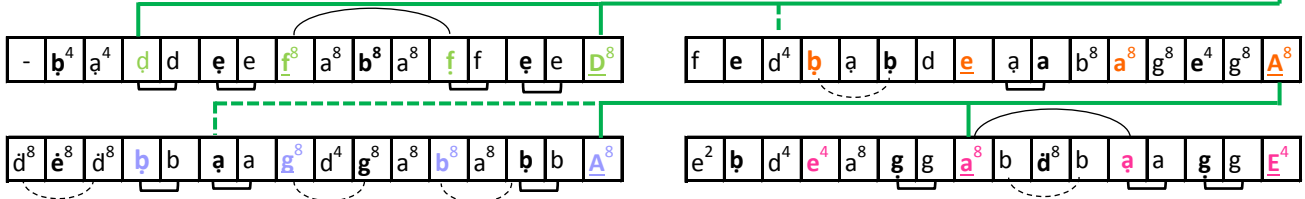

A – 2: Theme II (P 5 – 7)

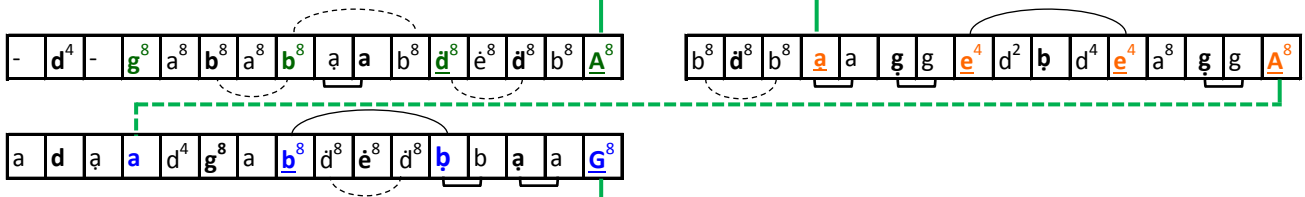

A – 3: Theme III (P 8 – 11)

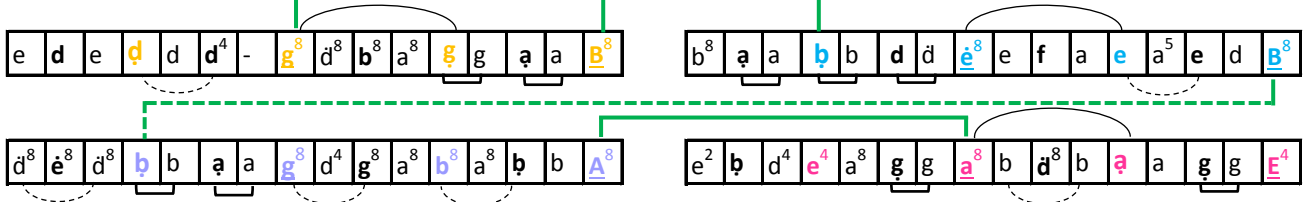

A – 4: Theme I [Repetition] (P 12 – 14)

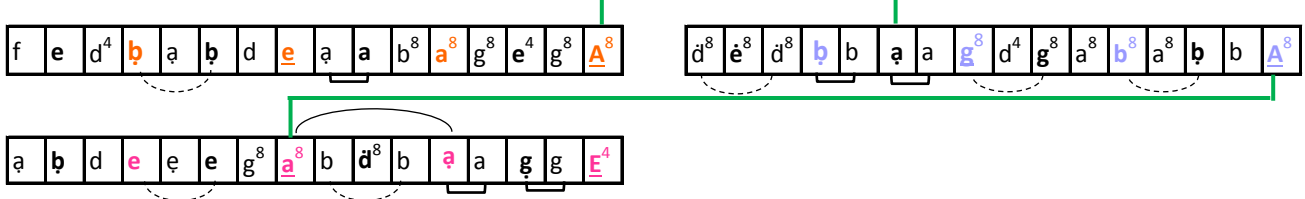

A – 6: Ending of Section A or Introduction of Section B (P 15 – 16)

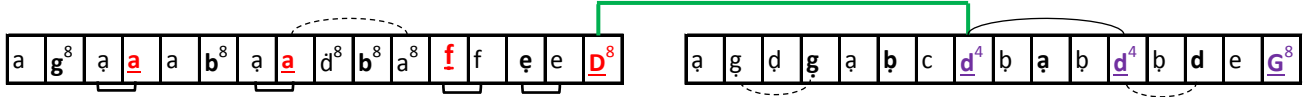

Thai Fine Arts Department [TF]: Rhyming Structure: Section B (Phrase 17 – 32)

B – 1: Transition I (17 – 18)

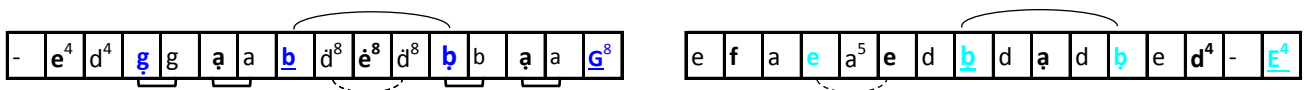

B – 2: Theme IV (P 19 – 22)

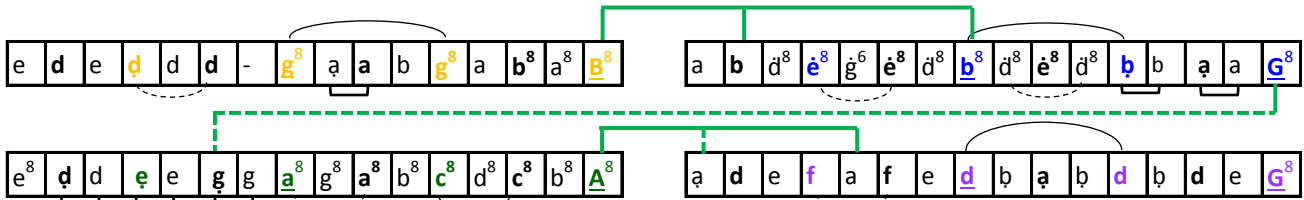

B – 3: Transition II (P 23 – 24)

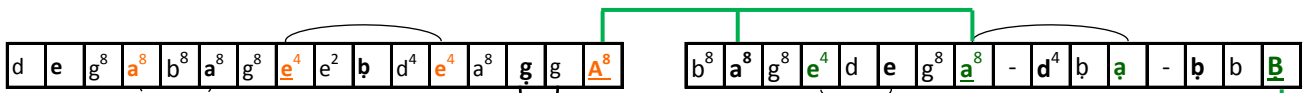

B – 4: Theme V (P 25 – 28)

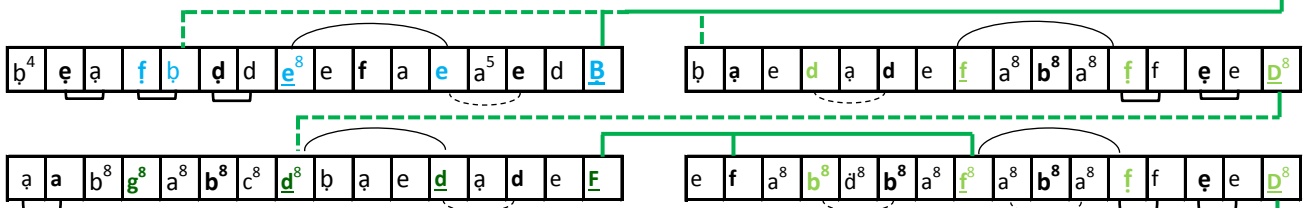

B – 5: Ending of section B [Final Phrase] (P 29 – 32)

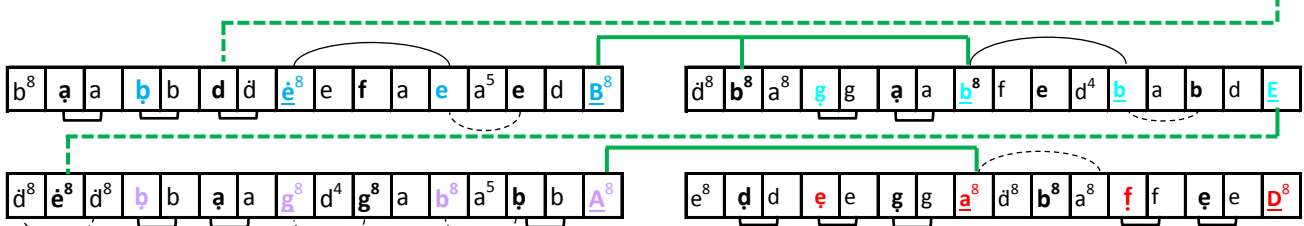

Coda [Transition + Theme I + Final Phrase] (P 51 – 54)

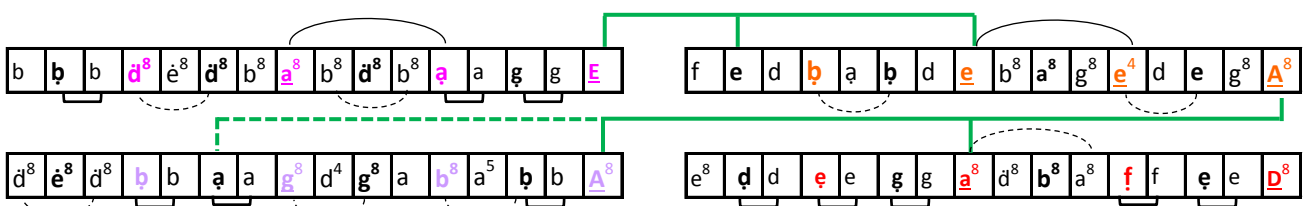

Luang Bamrung Chit Charoen (TB) : Rhyming Structure: Section A [Phrase (P) 0 – 16]

A – 0: Introduction (P0 )

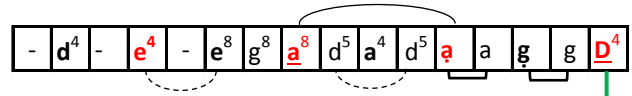

A – 1: Opening phrase (P1) + Theme I (P2 – 4)

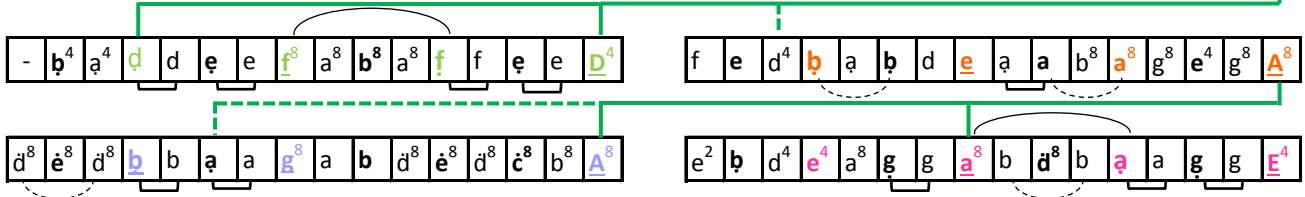

A – 2: Theme II (P 5 – 7)

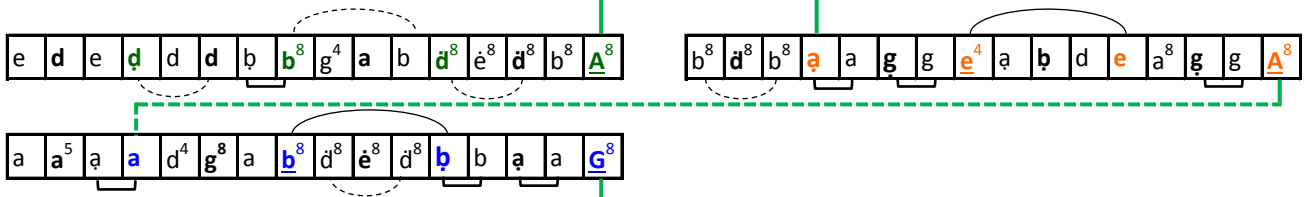

A – 3: Theme III (P 8 – 11)

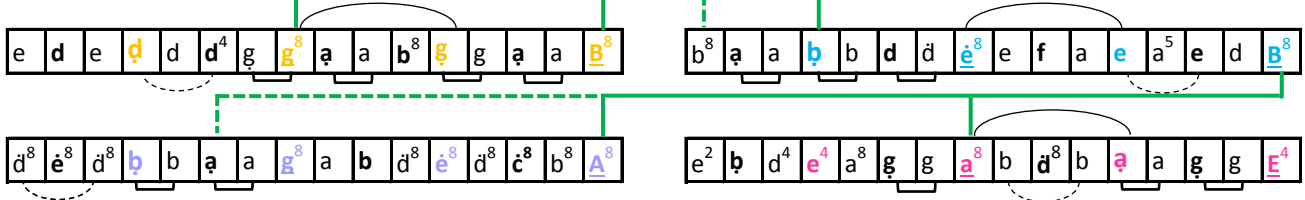

A – 4: Theme I [Repetition] (P 12 – 14)

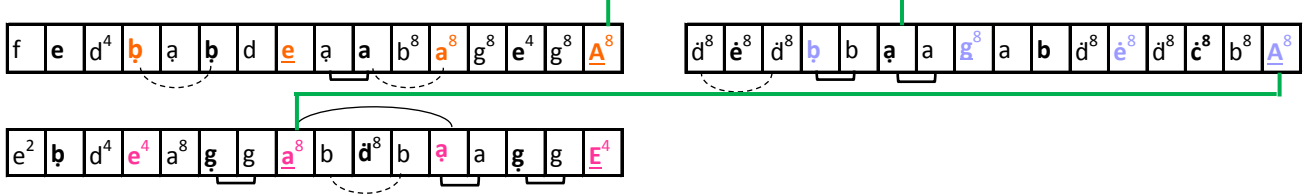

A – 6: Ending of Section A or Introduction of Section B (P 15 – 16)

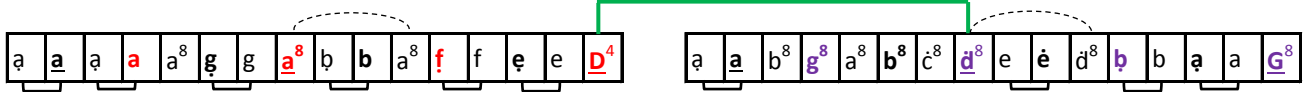

Luang Bamrung Chit Charoen (TB): Rhyming Structure: Section B (Phrase 17 – 32)

B – 1: Transition I (17 – 18)

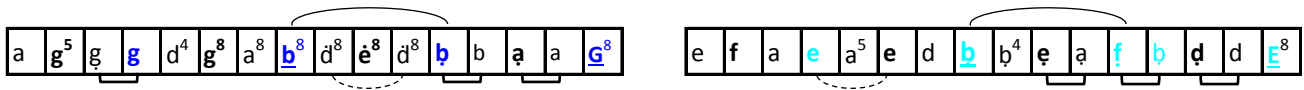

B – 2: Theme IV (P 19 – 22)

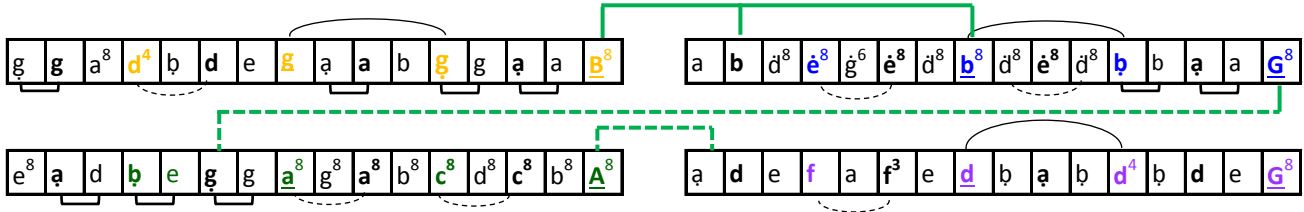

B – 3: Transition II (P 23 – 24)

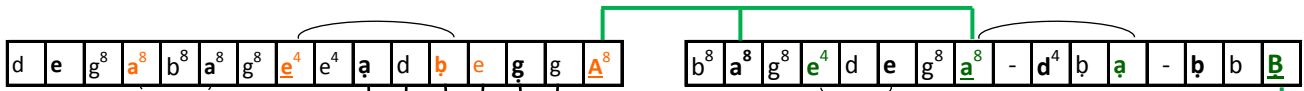

B – 4: Theme V (P 25 – 28)

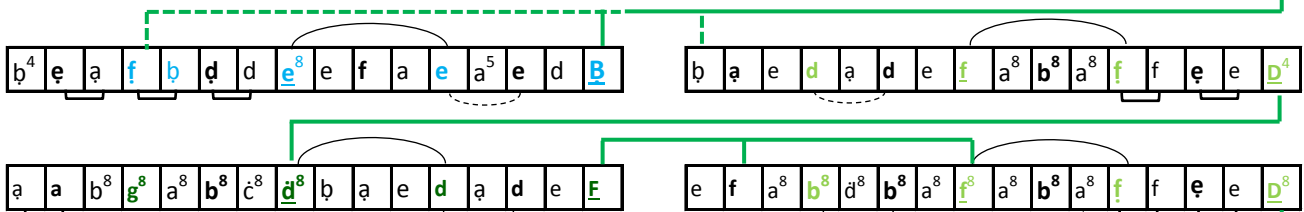

B – 5: Ending of section B [Final Phrase] (P 29 – 32)

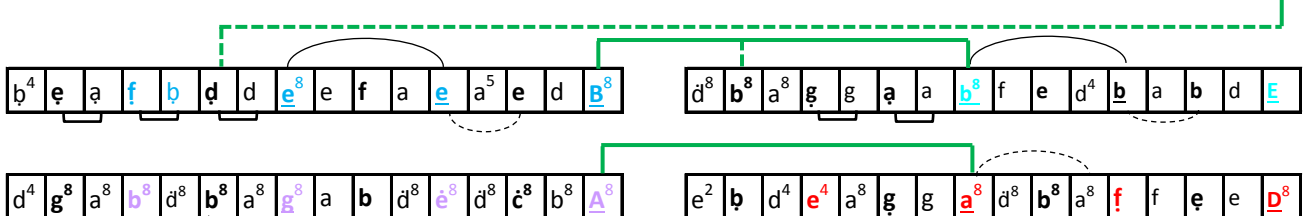

Coda [Transition + Theme I + Final Phrase] (P 51 – 54)

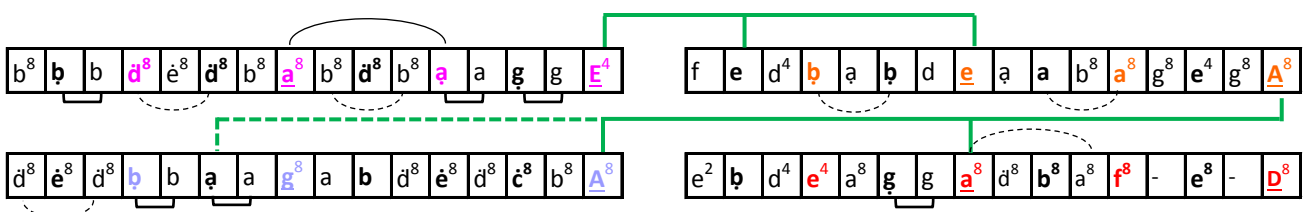

Samran Kerdphol I (TS1): Rhyming Structure: Section A [Phrase (P) 0 – 16]

A – 0: Introduction (P0 )

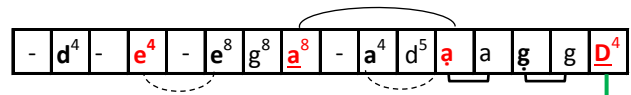

A – 1: Opening phrase (P1) + Theme I (P2 – 4)

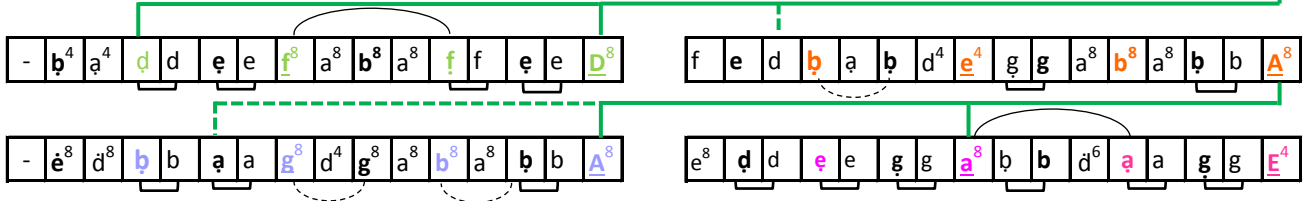

A – 2: Theme II (P 5 – 7)

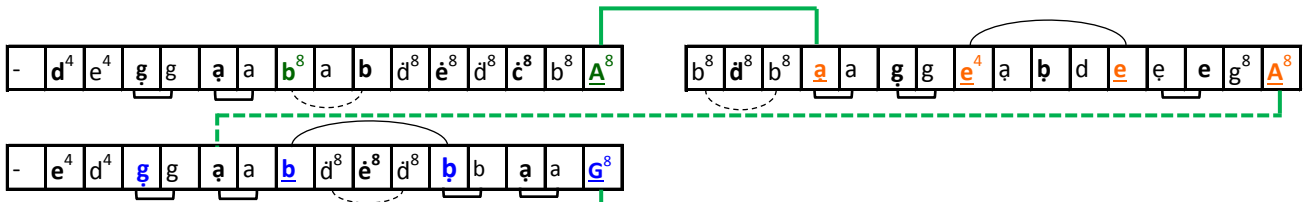

A – 3: Theme III (P 8 – 11)

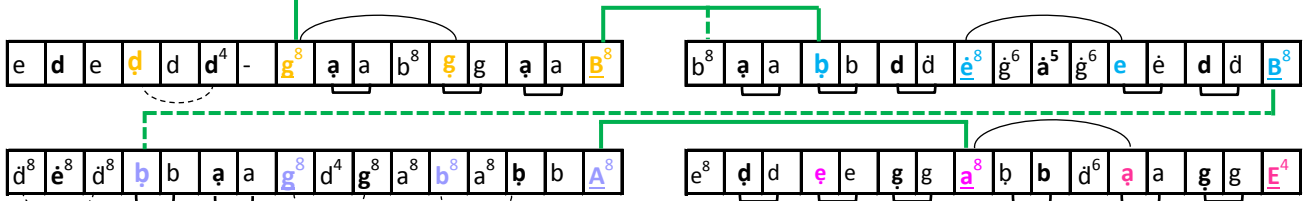

A – 4: Theme I [Repetition] (P 12 – 14)

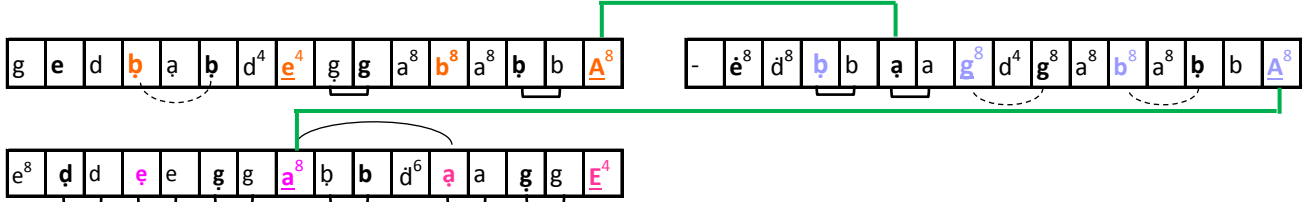

A – 6: Ending of Section A or Introduction of Section B (P 15 – 16)

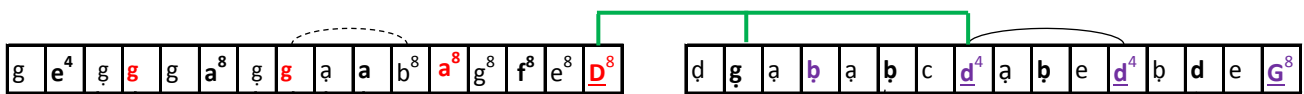

Samran Kerdphol I (TS1): Rhyming Structure: Section B (Phrase 17 – 32)

B – 1: Transition I (17 – 18)

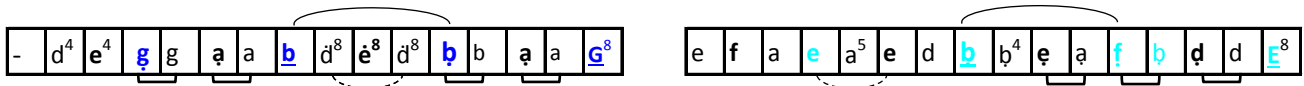

B – 2: Theme IV (P 19 – 22)

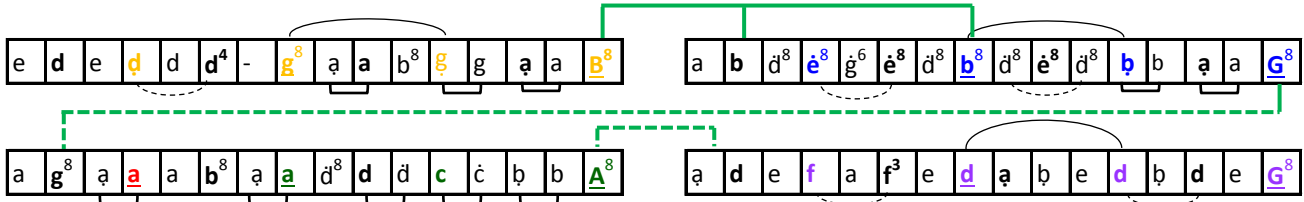

B – 3: Transition II (P 23 – 24)

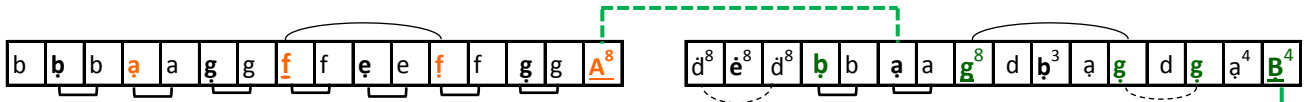

B – 4: Theme V (P 25 – 28)

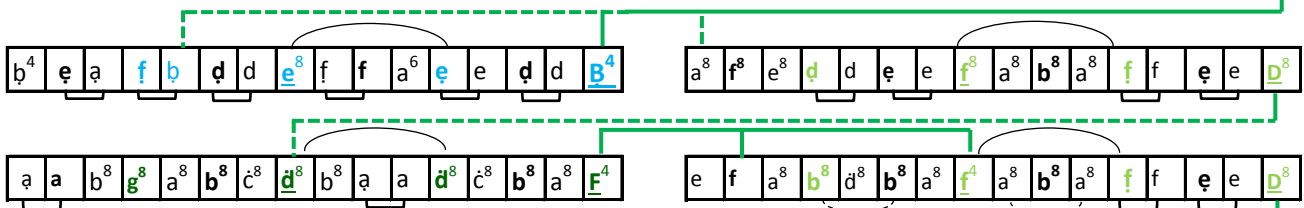

B – 5: Ending of section B [Final Phrase] (P 29 – 32)

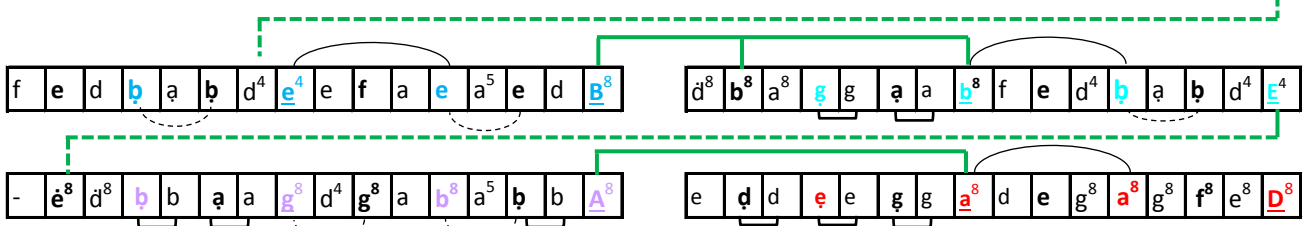

Coda [Transition + Theme I + Final Phrase] (P 51 – 54)

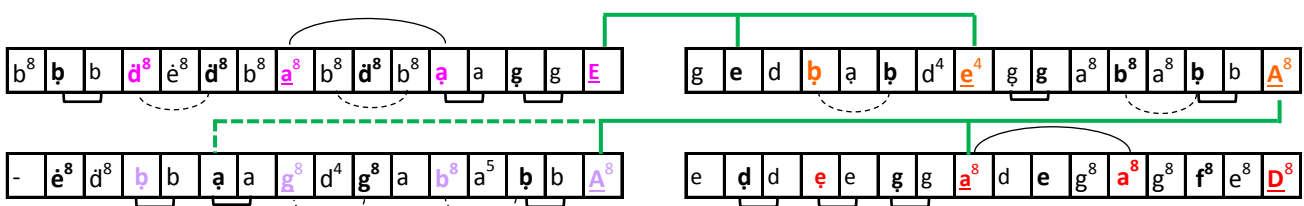

Phinij Chaisuwan (TP1) : Rhyming Structure: Section A [Phrase (P) 0 – 16]

A – 0: Introduction (P0 )

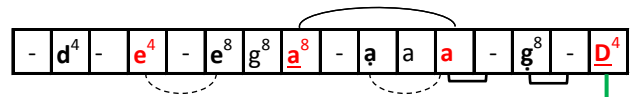

A – 1: Opening phrase (P1) + Theme I (P2 – 4)

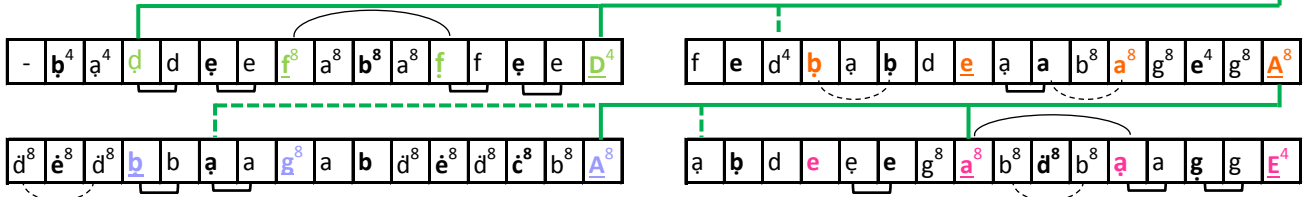

A – 2: Theme II (P 5 – 7)

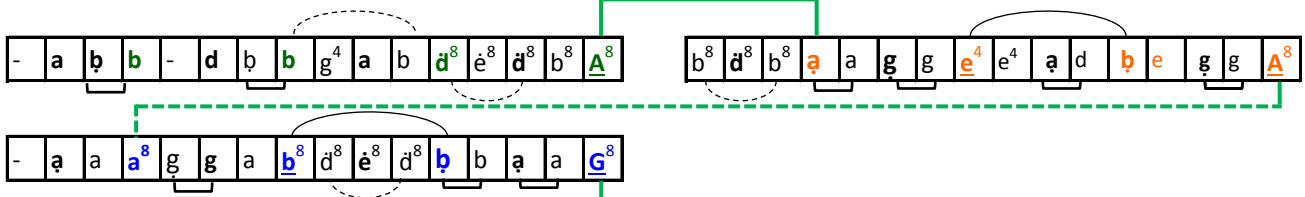

A – 3: Theme III (P 8 – 11)

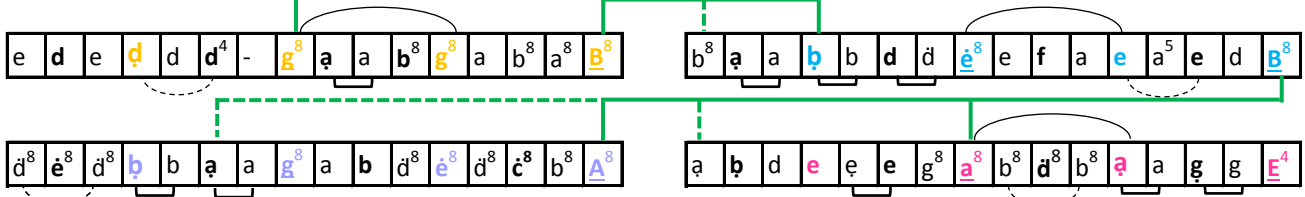

A – 4: Theme I [Repetition] (P 12 – 14)

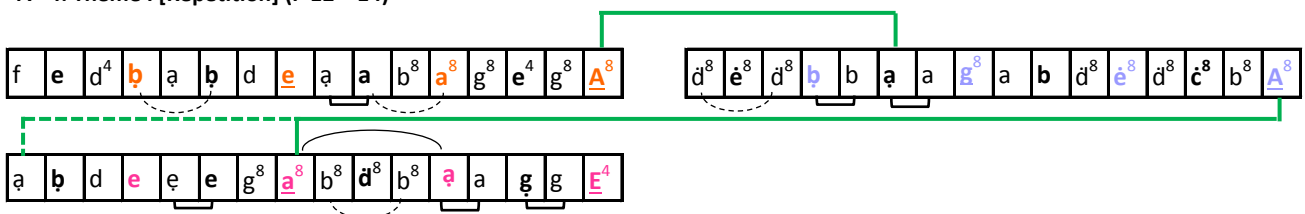

A – 6: Ending of Section A or Introduction of Section B (P 15 – 16)

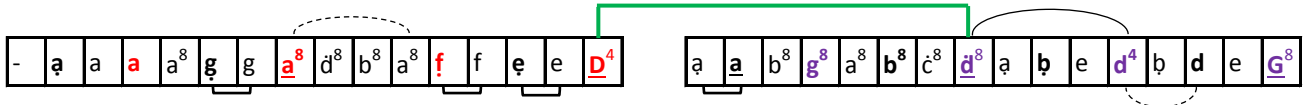



Phinij Chaisuwan (TP1): Rhyming Structure: Section B (Phrase 17 – 32)

B – 1: Transition I (17 – 18)

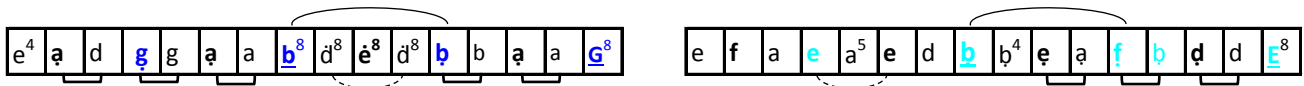

B – 2: Theme IV (P 19 – 22)

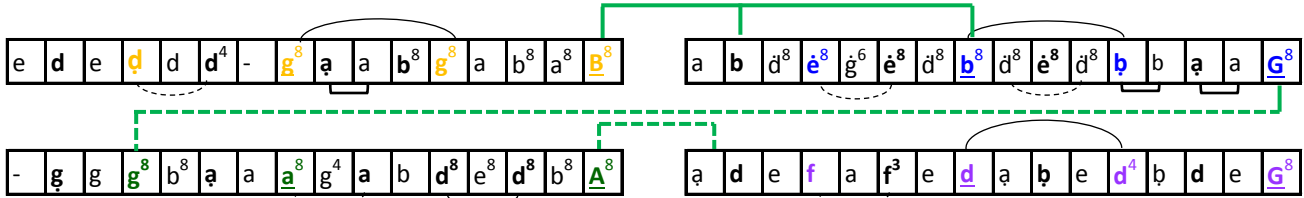

B – 3: Transition II (P 23 – 24)



B – 4: Theme V (P 25 – 28)

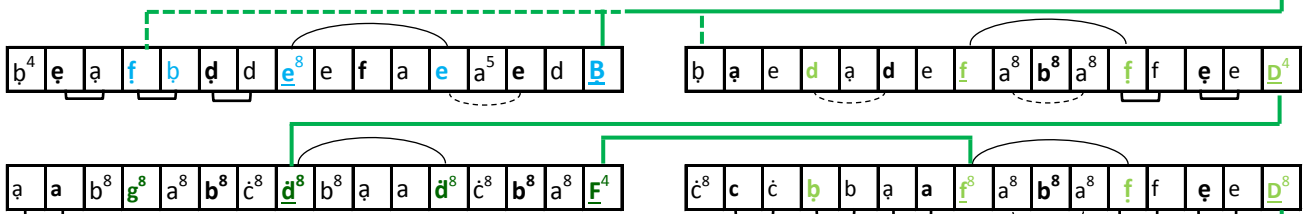

B – 5: Ending of section B [Final Phrase] (P 29 – 32)

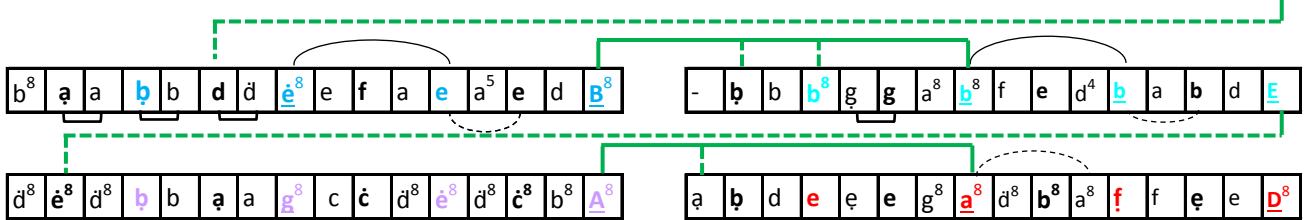

Coda [Transition + Theme I + Final Phrase] (P 51 – 54)

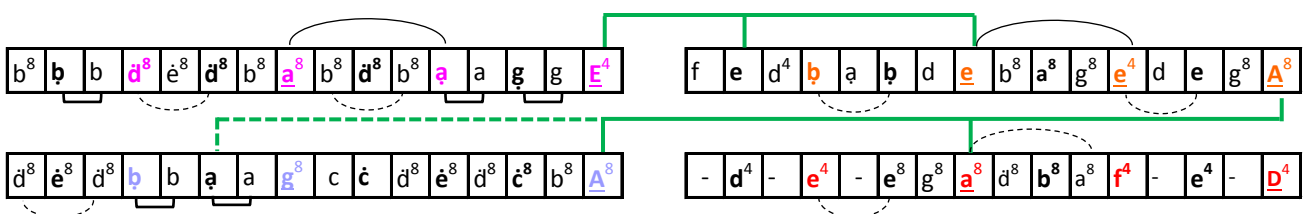

Thai music ensemble of Bangkok (TK) : Rhyming Structure: Section A [Phrase (P) 0 – 16]

A – 0: Introduction (P0 )

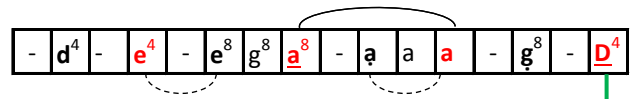

A – 1: Opening phrase (P1) + Theme I (P2 – 4)

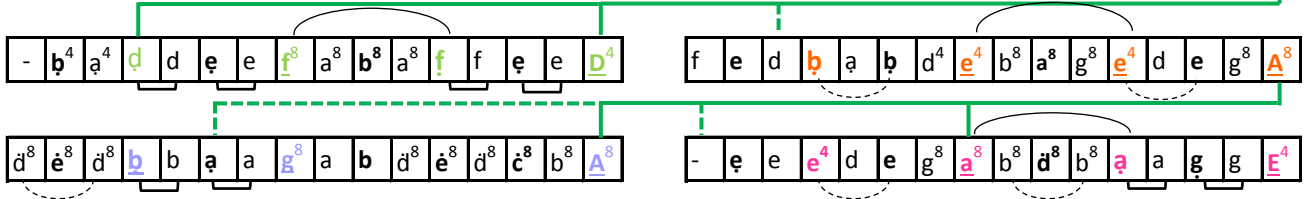

A – 2: Theme II (P 5 – 7)

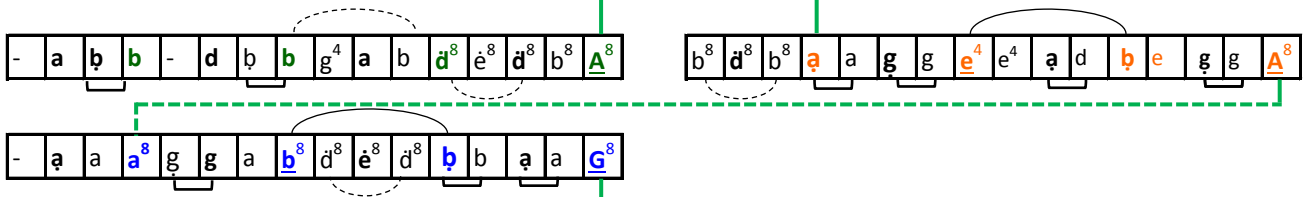

A – 3: Theme III (P 8 – 11)

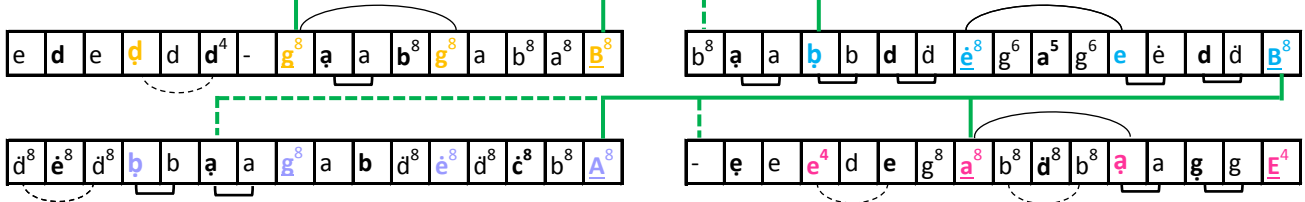

A – 4: Theme I [Repetition] (P 12 – 14)

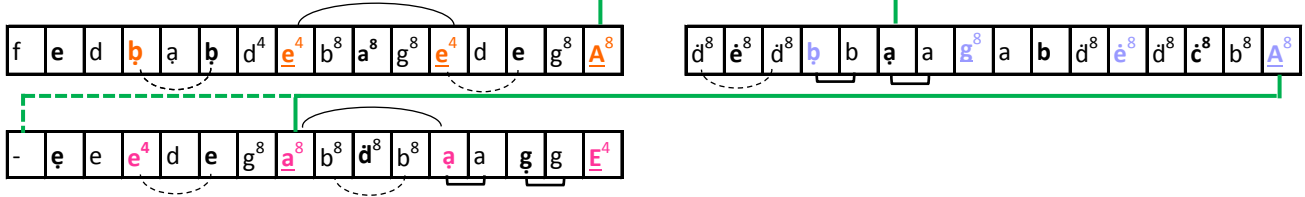

A – 6: Ending of Section A or Introduction of Section B (P 15 – 16)

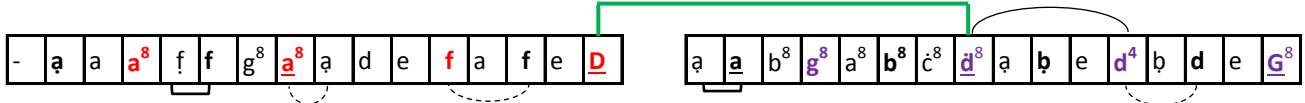

Thai music ensemble of Bangkok (TK): Rhyming Structure: Section B (Phrase 17 – 32)

B – 1: Transition I (17 – 18)

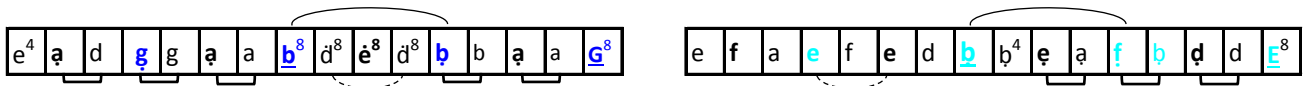

B – 2: Theme IV (P 19 – 22)

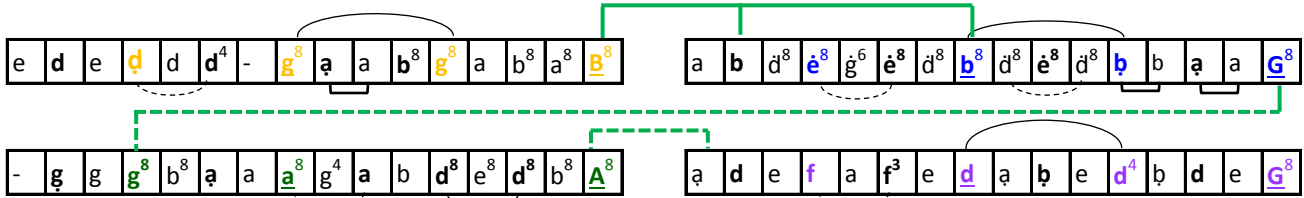

B – 3: Transition II (P 23 – 24)

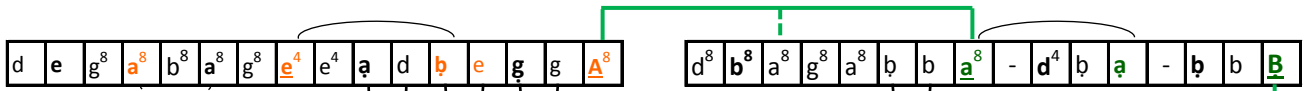

B – 4: Theme V (P 25 – 28)

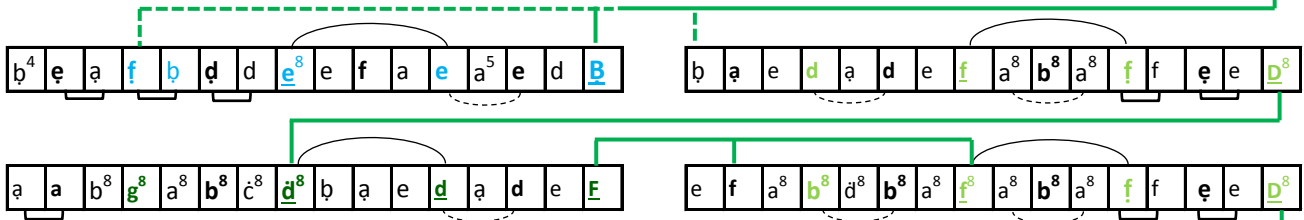

B – 5: Ending of section B [Final Phrase] (P 29 – 32)

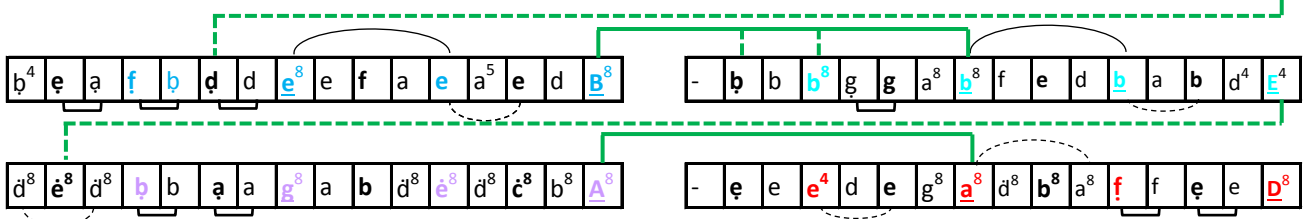

Coda [Transition + Theme I + Final Phrase] (P 51 – 54)

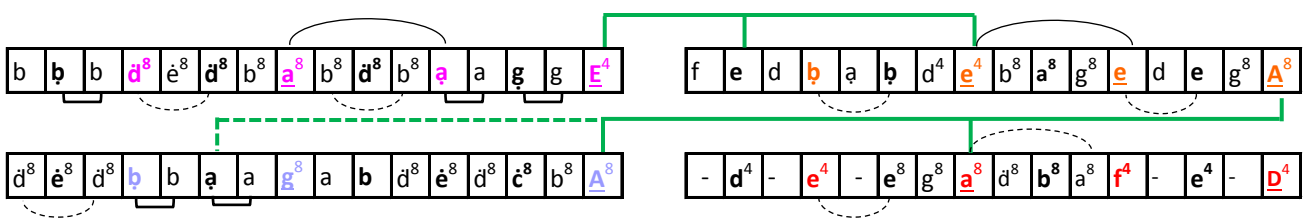

Chub Sowat (TC) : Rhyming Structure: Section A [Phrase (P) 0 – 16]

A – 0: Introduction (P0 )

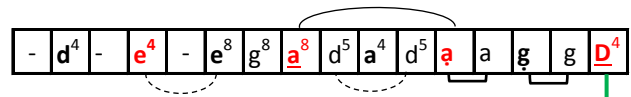

A – 1: Opening phrase (P1) + Theme I (P2 – 4)

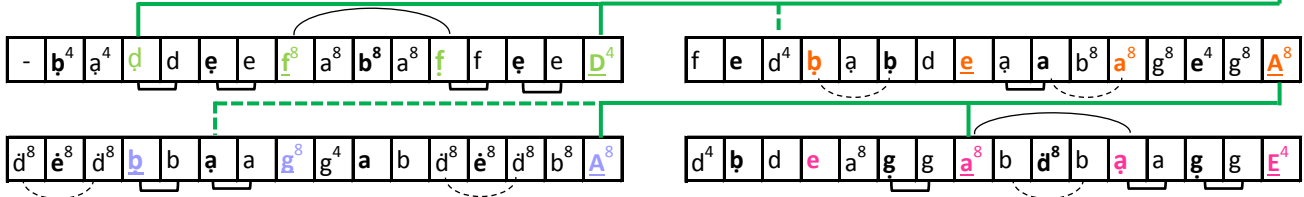

A – 2: Theme II (P 5 – 7)

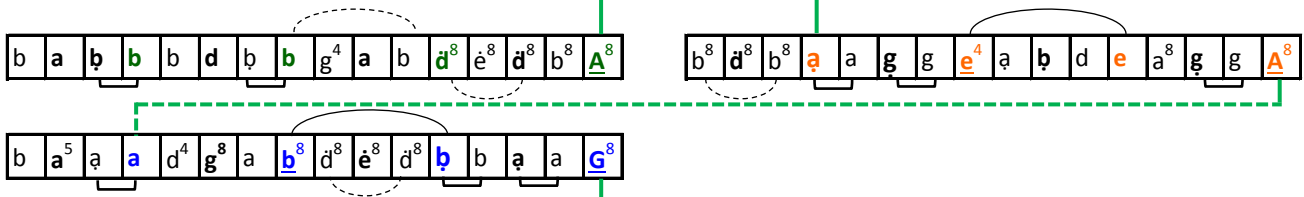

A – 3: Theme III (P 8 – 11)

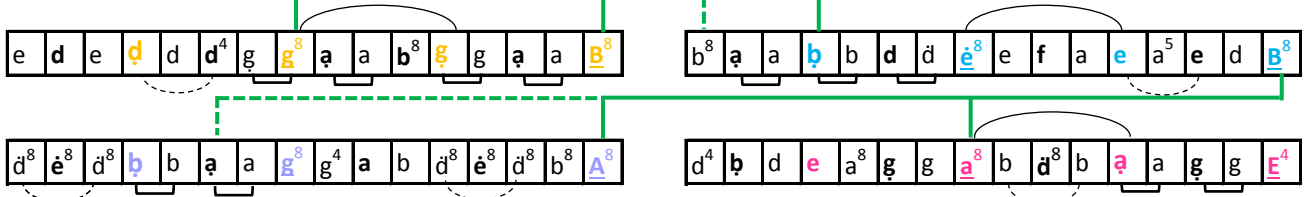

A – 4: Theme I [Repetition] (P 12 – 14)

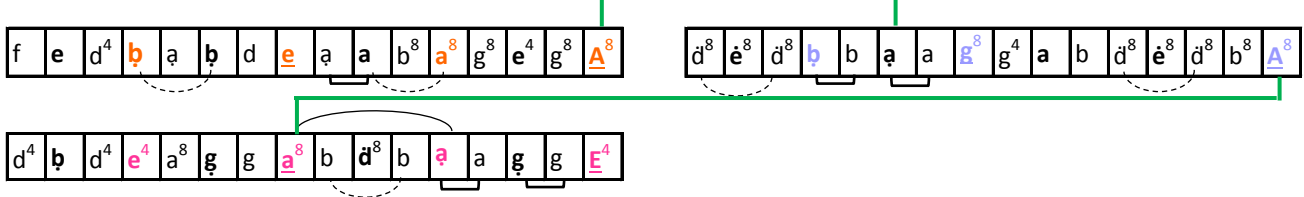

A – 6: Ending of Section A or Introduction of Section B (P 15 – 16)

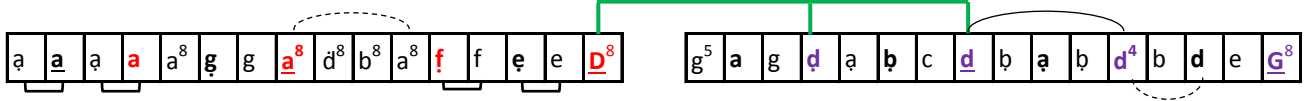

# Chub Sowat (TC): Rhyming Structure: Section B (Phrase 17 – 32)

## B – 1: Transition I (17 – 18)

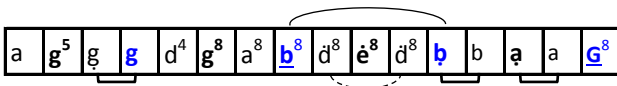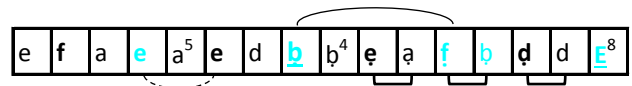

## B – 2: Theme IV (P 19 – 22)

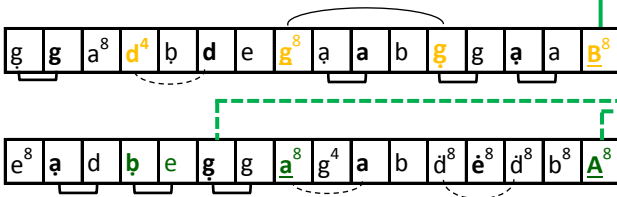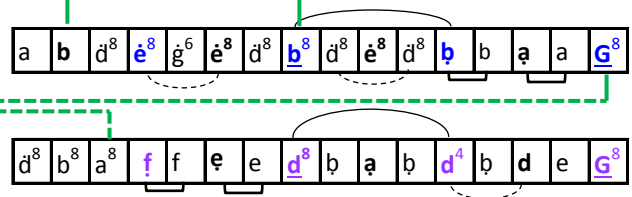

## B – 3: Transition II (P 23 – 24)

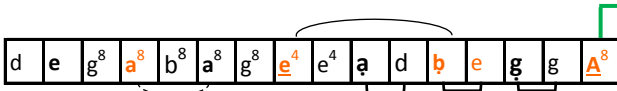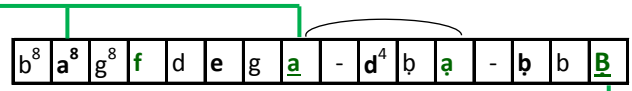

## B – 4: Theme V (P 25 – 28)

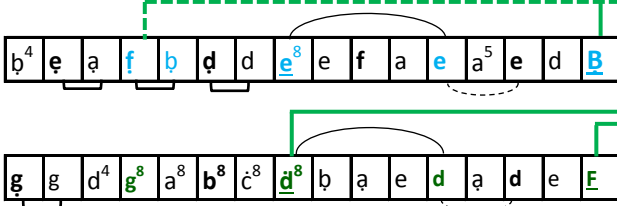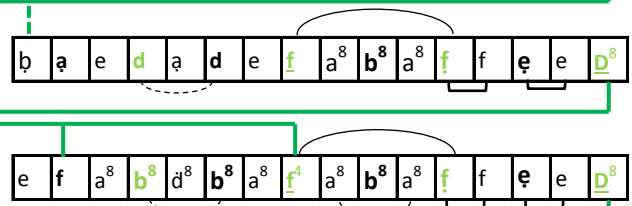

## B – 5: Ending of section B [Final Phrase] (P 29 – 32)

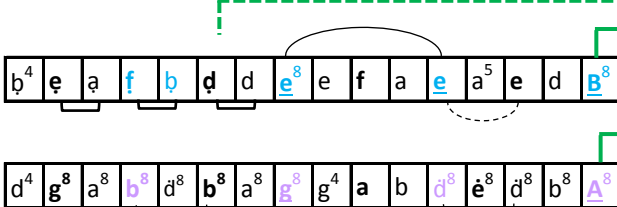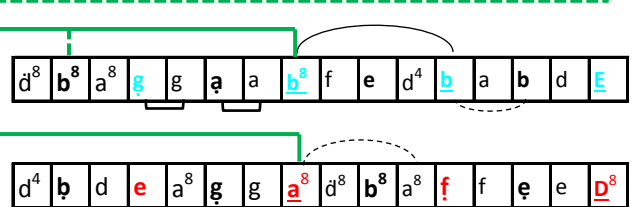

## Coda [Transition + Theme I + Final Phrase] (P 51 – 54)

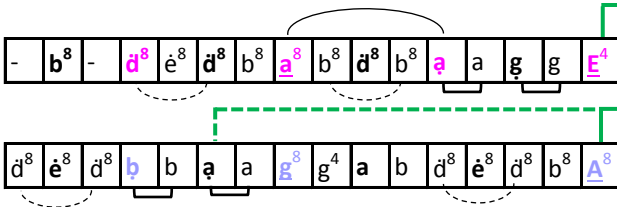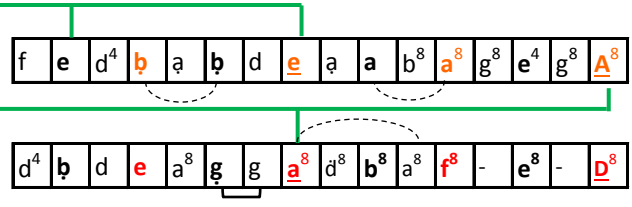

Chue Dontrirot (TD) : Rhyming Structure: Section A [Phrase (P) 0 – 16]

A – 0: Introduction (P0 )

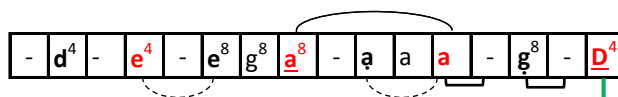

A – 1: Opening phrase (P1) + Theme I (P2 – 4)

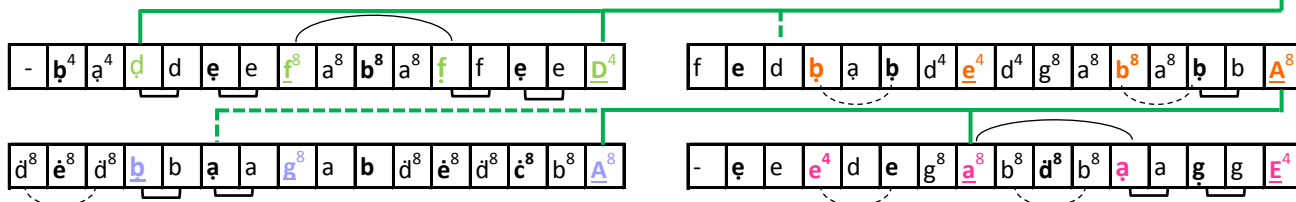

A – 2: Theme II (P 5 – 7)

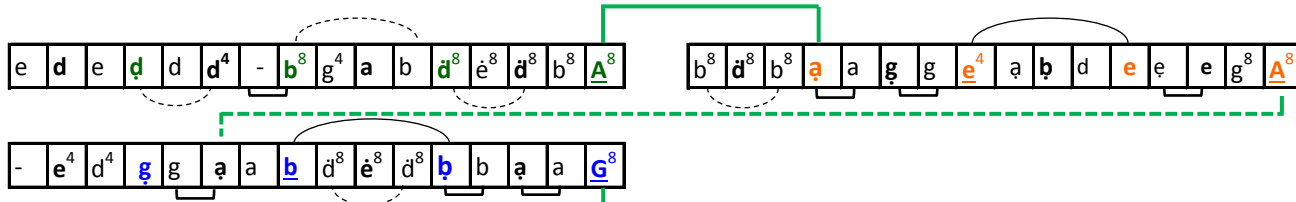

A – 3: Theme III (P 8 – 11)

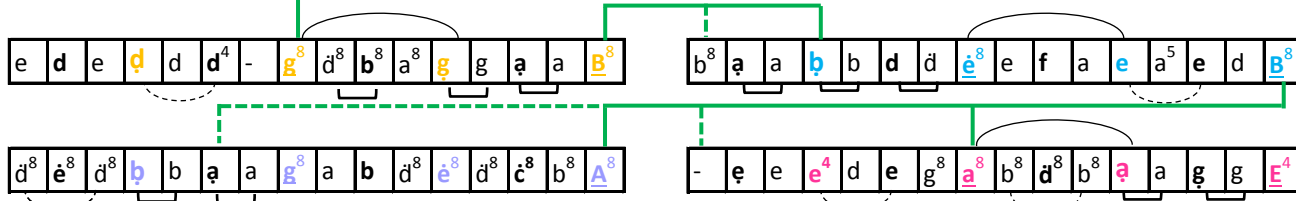

A – 4: Theme I [Repetition] (P 12 – 14)

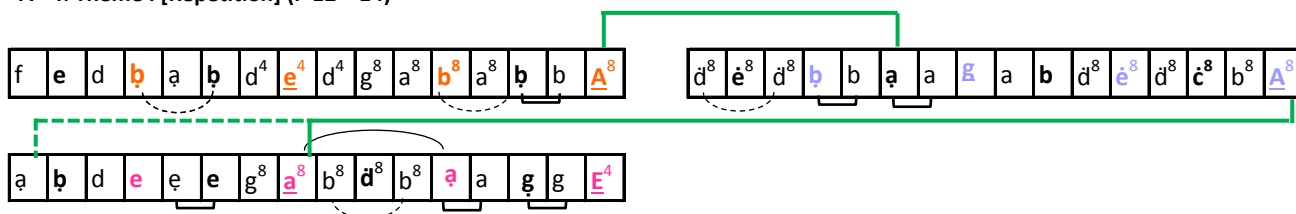

A – 6: Ending of Section A or Introduction of Section B (P 15 – 16)

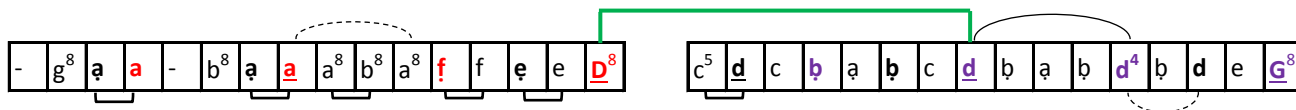

# Chue Dontrirot (TD): Rhyming Structure: Section B (Phrase 17 – 32)

## B – 1: Transition I (17 – 18)

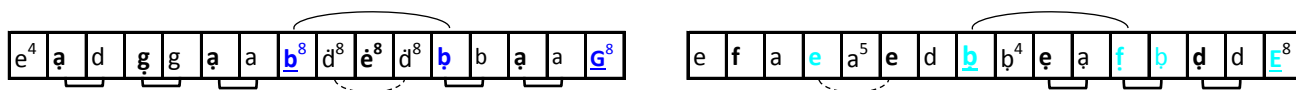

## B – 2: Theme IV (P 19 – 22)

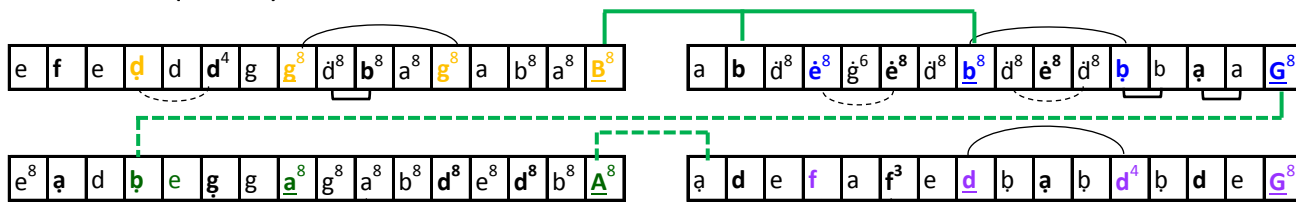

## B – 3: Transition II (P 23 – 24)

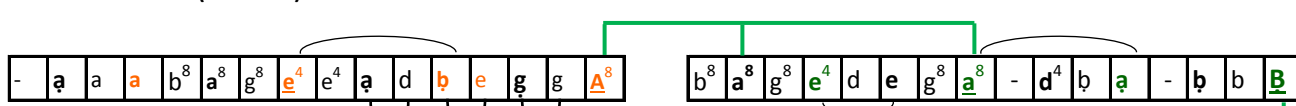

## B – 4: Theme V (P 25 – 28)

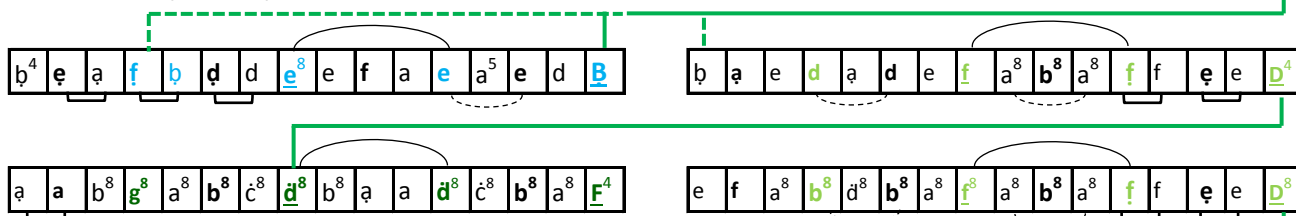

## B – 5: Ending of section B [Final Phrase] (P 29 – 32)

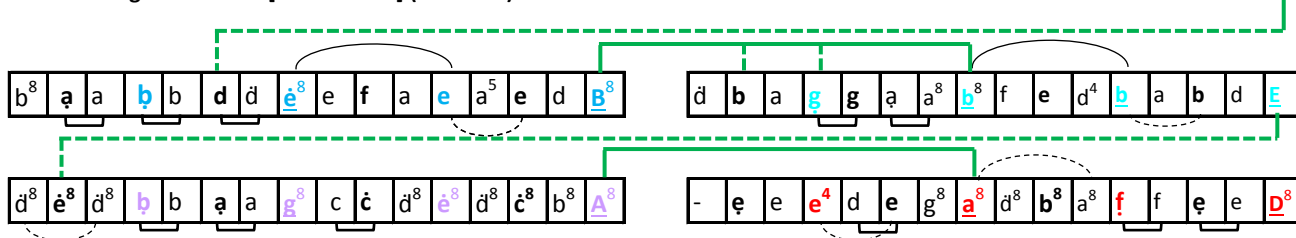

## Coda [Transition + Theme I + Final Phrase] (P 51 – 54)

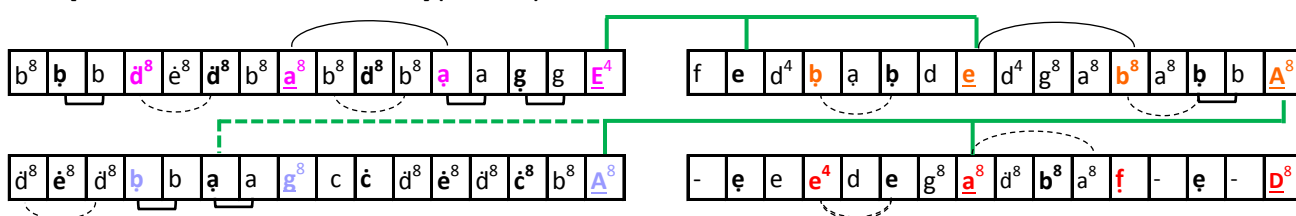

Tuen Phatayakul (TP) : Rhyming Structure: Section A [Phrase (P) 0 – 16]

A – 0: Introduction (P0 )

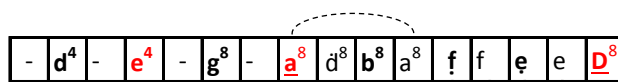

A – 1: Opening phrase (P1) + Theme I (P2 – 4)

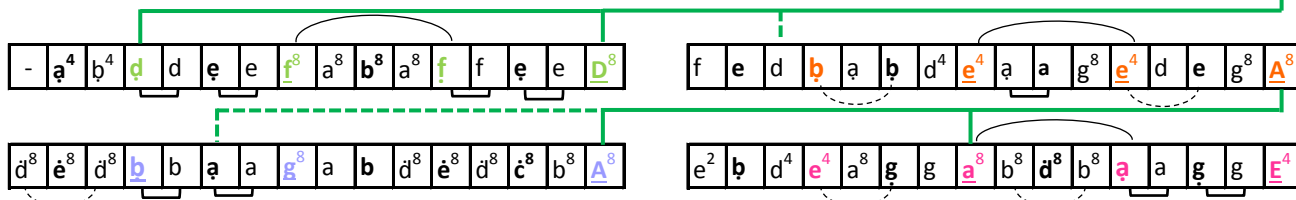

A – 2: Theme II (P 5 – 7)

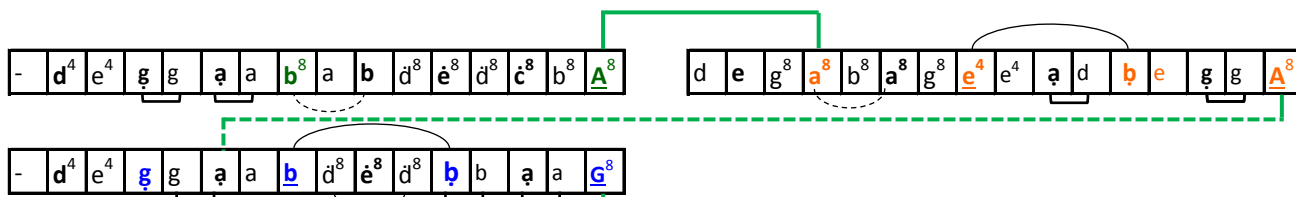

A – 3: Theme III (P 8 – 11)

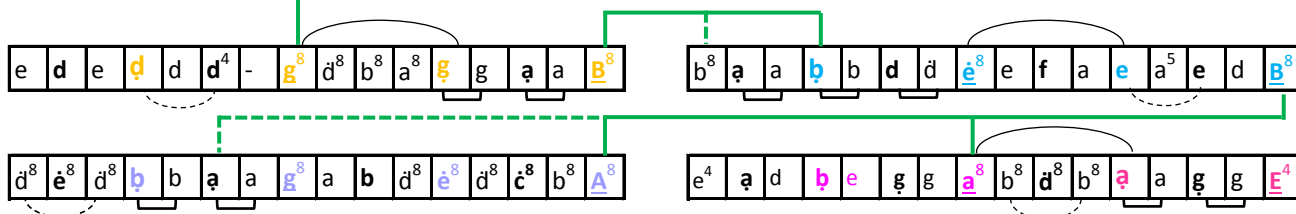

A – 4: Theme I [Repetition] (P 12 – 14)

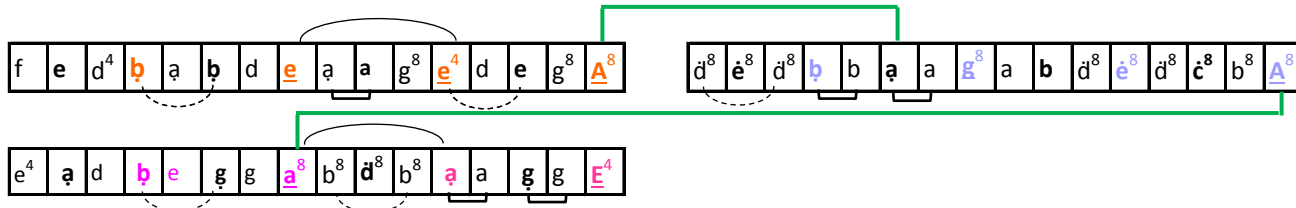

A – 6: Ending of Section A or Introduction of Section B (P 15 – 16)

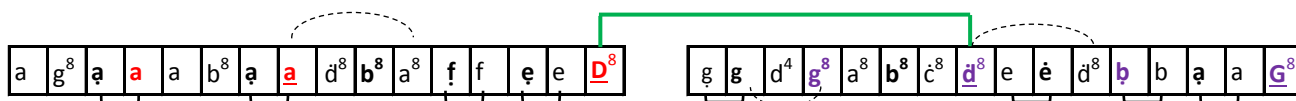



Tuen Phatayakul (TP): Rhyming Structure: Section B (Phrase 17 – 32)

B – 1: Transition I (17 – 18)

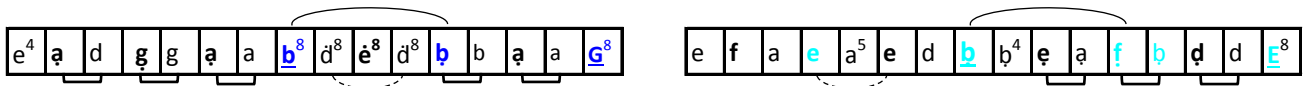

B – 2: Theme IV (P 19 – 22)

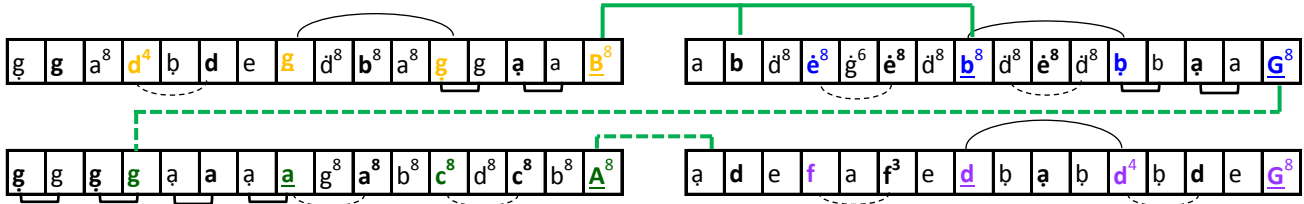

B – 3: Transition II (P 23 – 24)

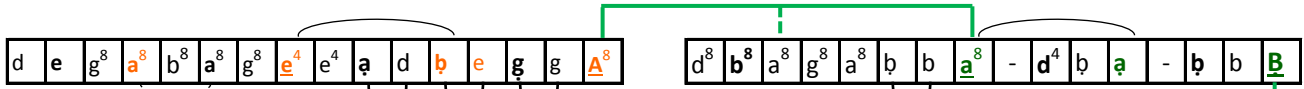

B – 4: Theme V (P 25 – 28)

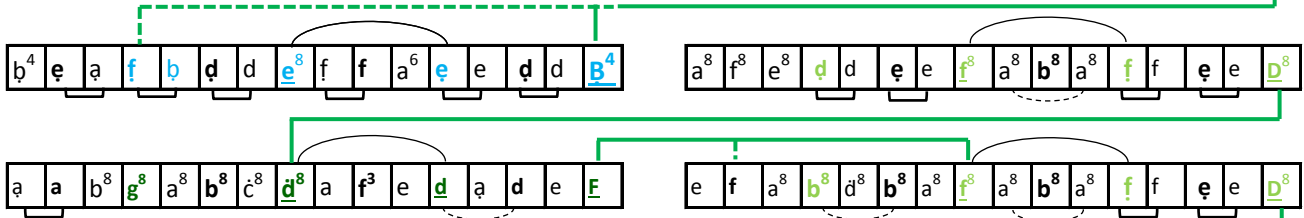

B – 5: Ending of section B [Final Phrase] (P 29 – 32)

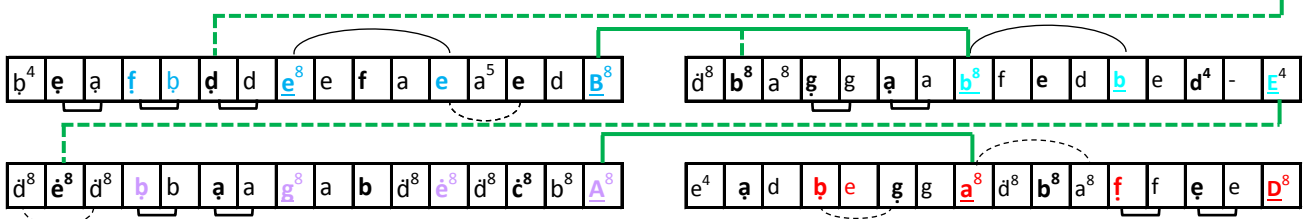

Coda [Transition + Theme I + Final Phrase] (P 51 – 54)

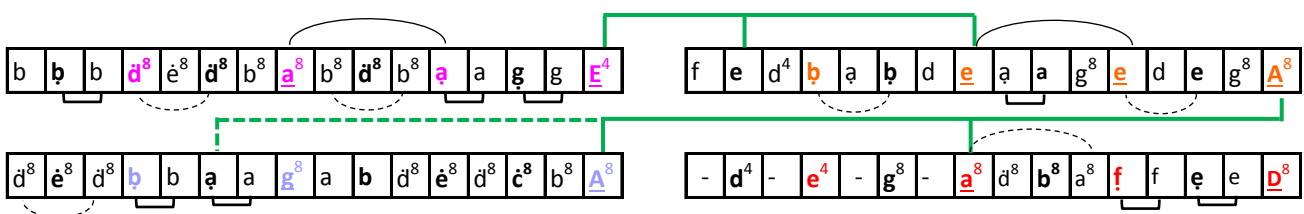

Thawin Attakisna (TT) : Rhyming Structure: Section A [Phrase (P) 0 – 16]

A – 0: Introduction (P0 )

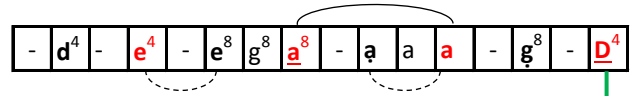

A – 1: Opening phrase (P1) + Theme I (P2 – 4)

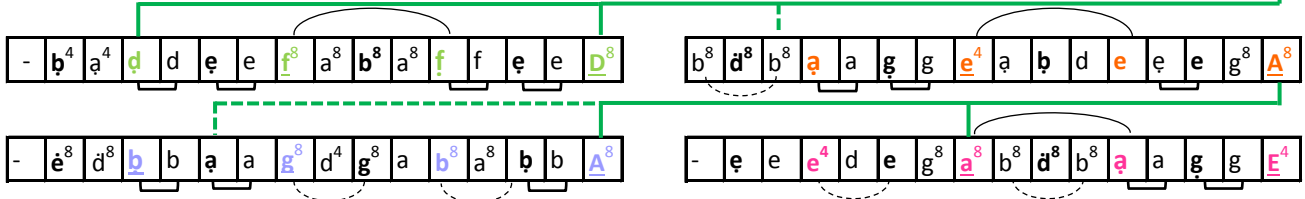

A – 2: Theme II (P 5 – 7)

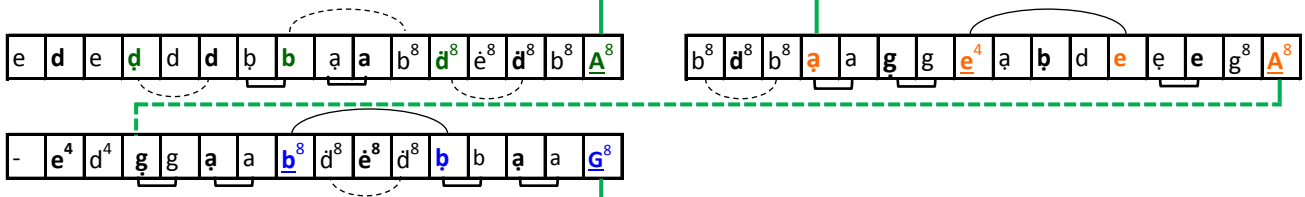

A – 3: Theme III (P 8 – 11)

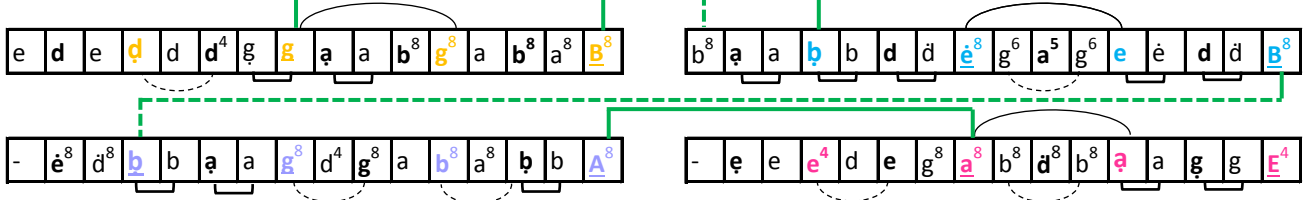

A – 4: Theme I [Repetition] (P 12 – 14)

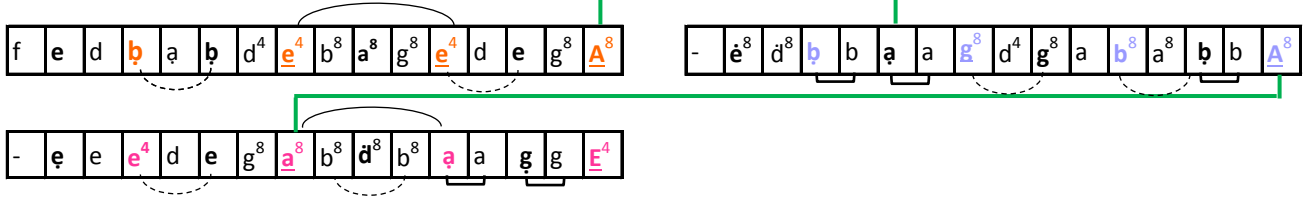

A – 6: Ending of Section A or Introduction of Section B (P 15 – 16)

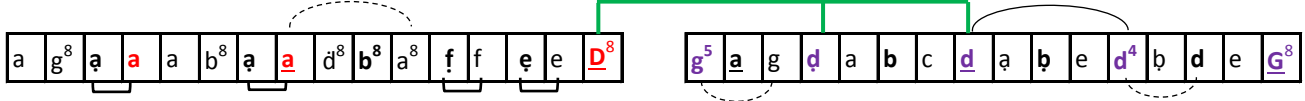

Thawin Attakisna (TT): Rhyming Structure: Section B (Phrase 17 – 32)

B – 1: Transition I (17 – 18)

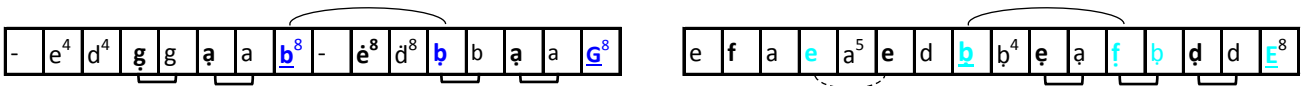

B – 2: Theme IV (P 19 – 22)

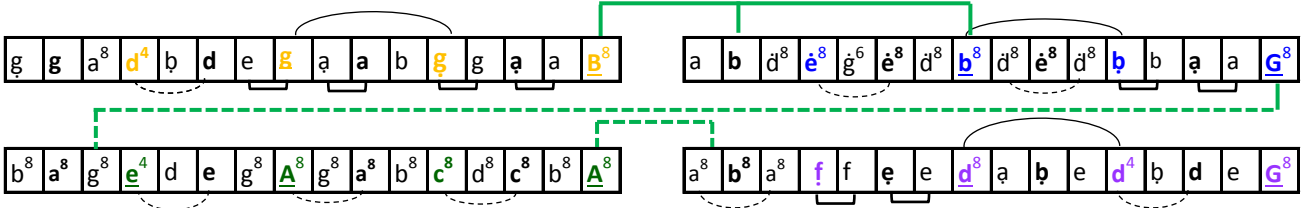

B – 3: Transition II (P 23 – 24)

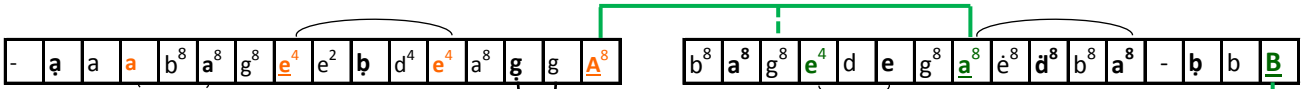

B – 4: Theme V (P 25 – 28)

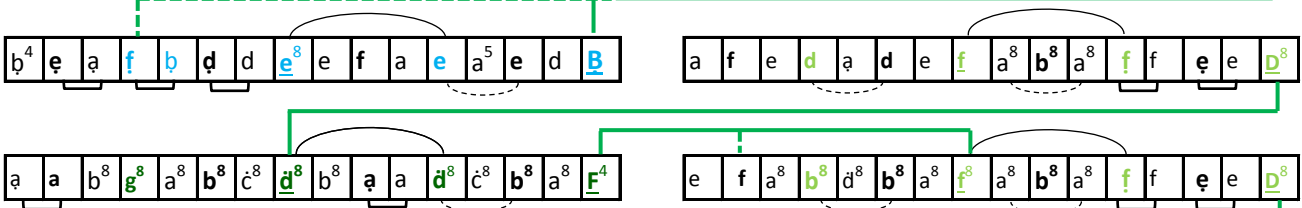

B – 5: Ending of section B [Final Phrase] (P 29 – 32)

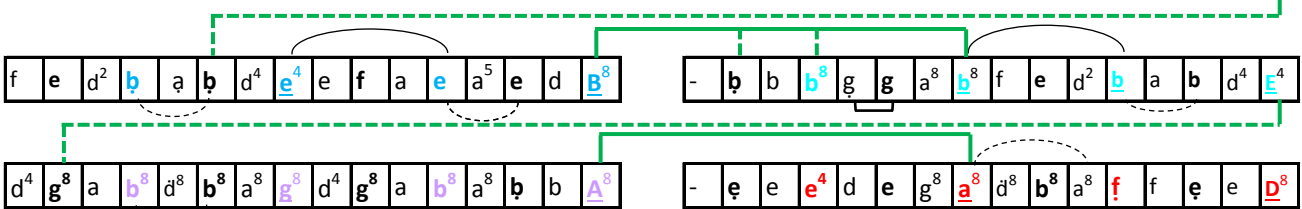

Coda [Transition + Theme I + Final Phrase] (P 51 – 54)

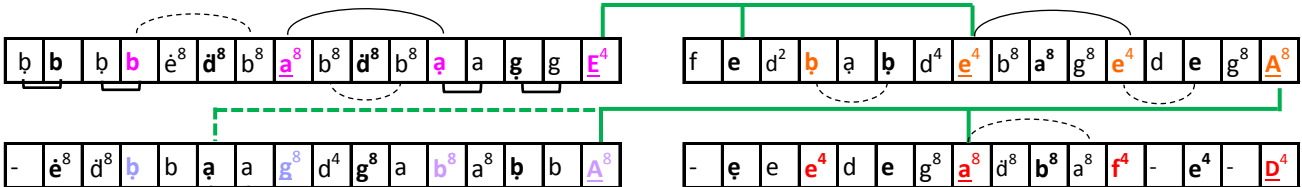

Phinij Chaisuwan II (TP2) : Rhyming Structure: Section A [Phrase (P) 0 – 16]

A – 0: Introduction (P0 )

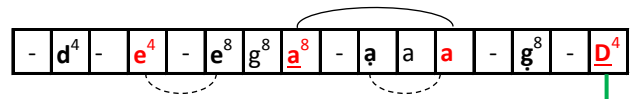

A – 1: Opening phrase (P1) + Theme I (P2 – 4)

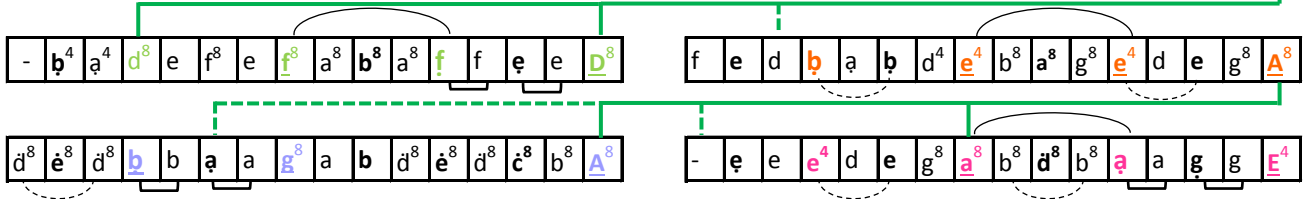

A – 2: Theme II (P 5 – 7)

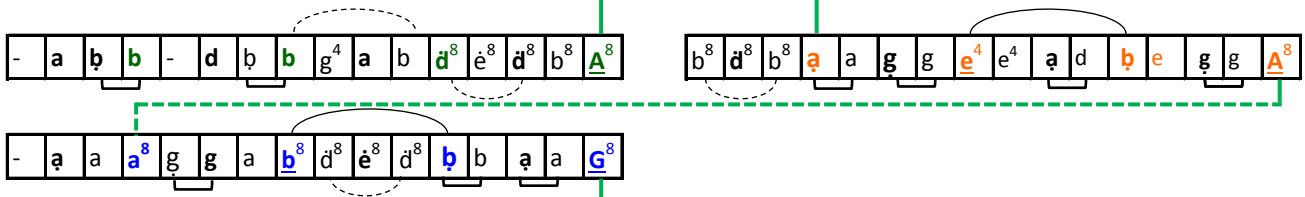

A – 3: Theme III (P 8 – 11)

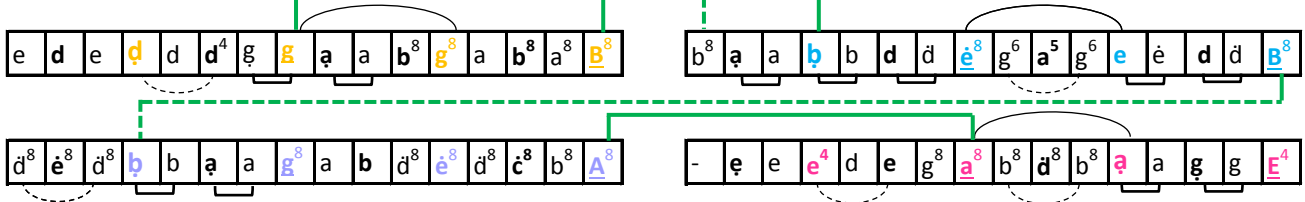

A – 4: Theme I [Repetition] (P 12 – 14)

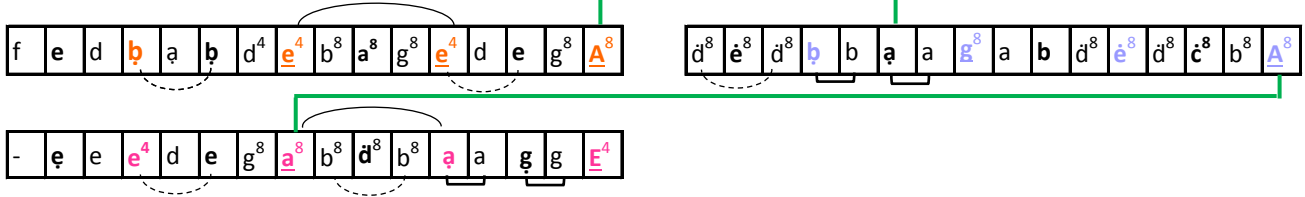

A – 6: Ending of Section A or Introduction of Section B (P 15 – 16)



Phinij Chaisuwan II (TP2): Rhyming Structure: Section B (Phrase 17 – 32)

B – 1: Transition I (17 – 18)

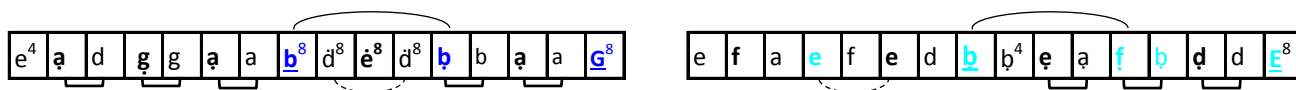

B – 2: Theme IV (P 19 – 22)

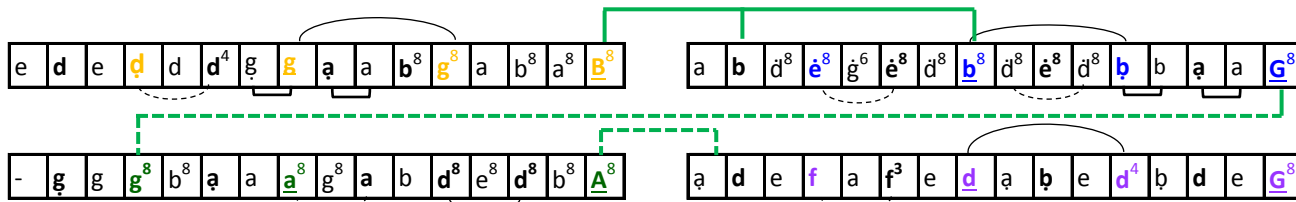

B – 3: Transition II (P 23 – 24)

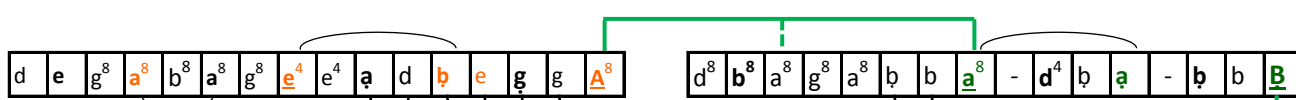

B – 4: Theme V (P 25 – 28)

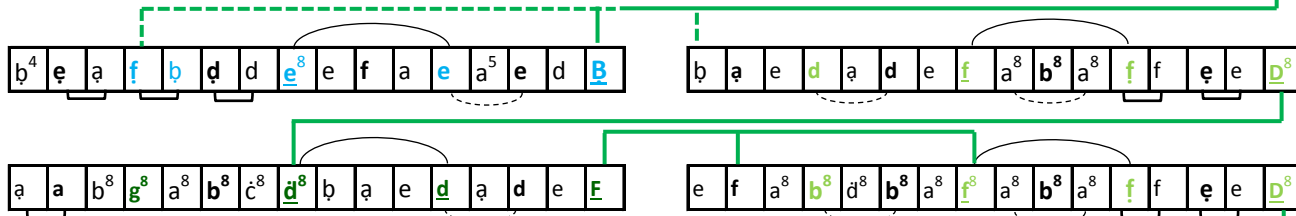

B – 5: Ending of section B [Final Phrase] (P 29 – 32)

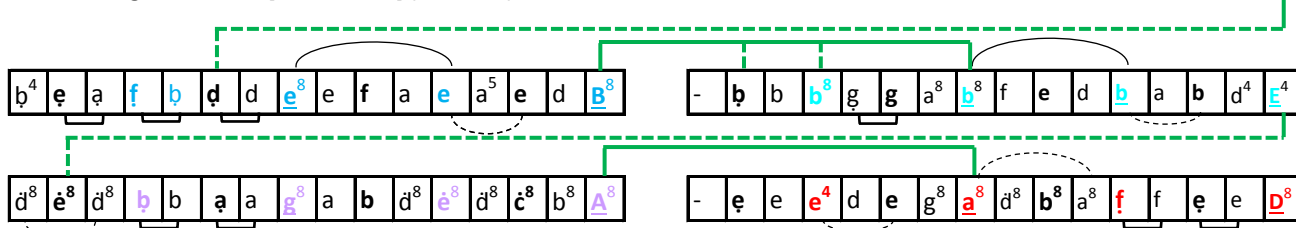

Coda [Transition + Theme I + Final Phrase] (P 51 – 54)

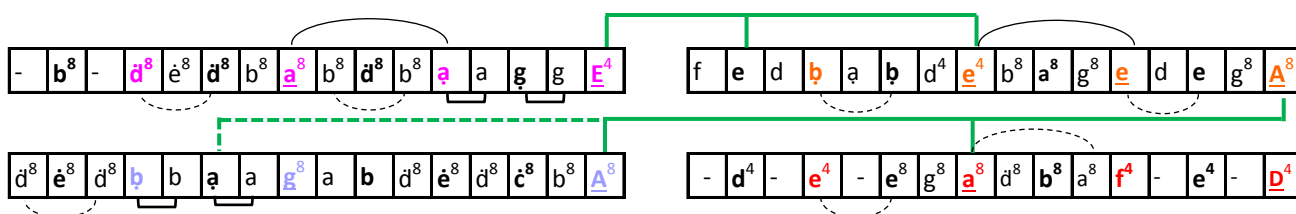

Rasi Phumthongsuk (TR) : Rhyming Structure: Section A [Phrase (P) 0 – 16]

A – 0: Introduction (P0 )

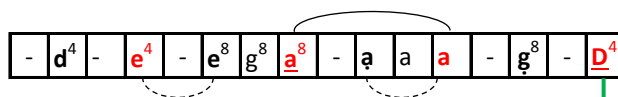

A – 1: Opening phrase (P1) + Theme I (P2 – 4)

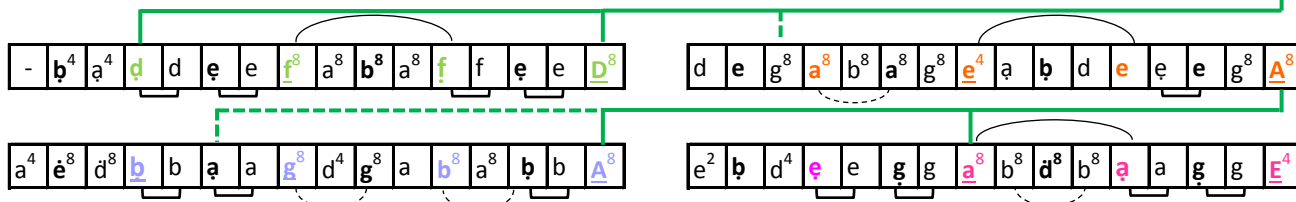

A – 2: Theme II (P 5 – 7)

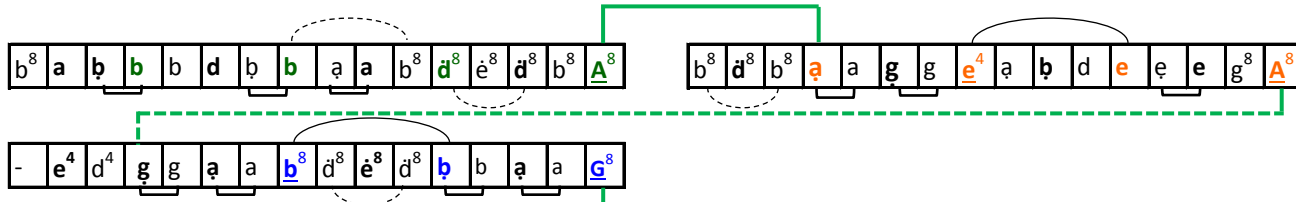

A – 3: Theme III (P 8 – 11)

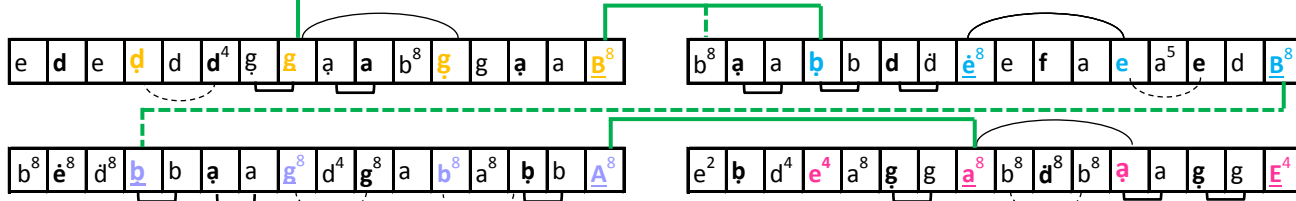

A – 4: Theme I [Repetition] (P 12 – 14)

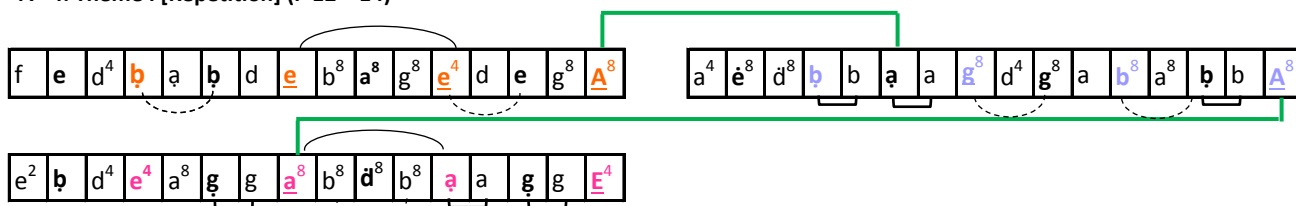

A – 6: Ending of Section A or Introduction of Section B (P 15 – 16)

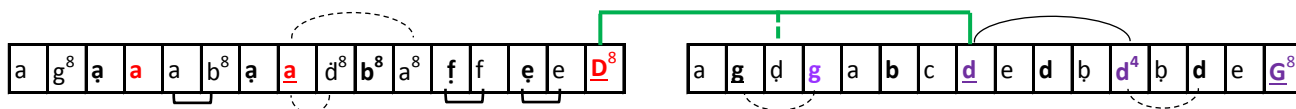

Rasi Phumthongsuk (TR): Rhyming Structure: Section B (Phrase 17 – 32)

B – 1: Transition I (17 – 18)

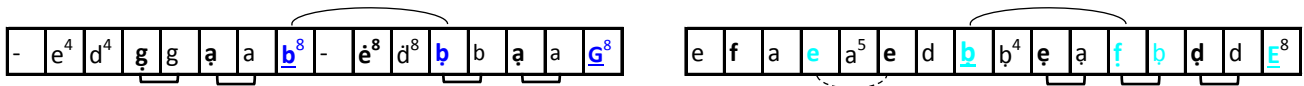

B – 2: Theme IV (P 19 – 22)

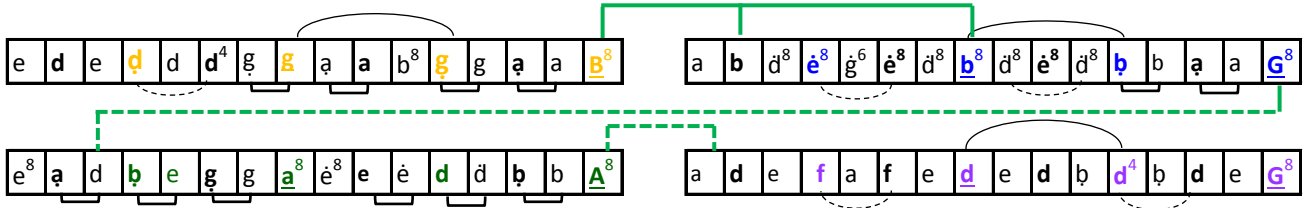

B – 3: Transition II (P 23 – 24)

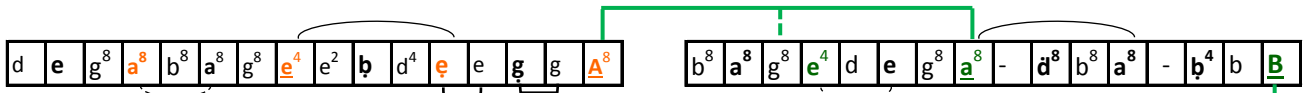

B – 4: Theme V (P 25 – 28)

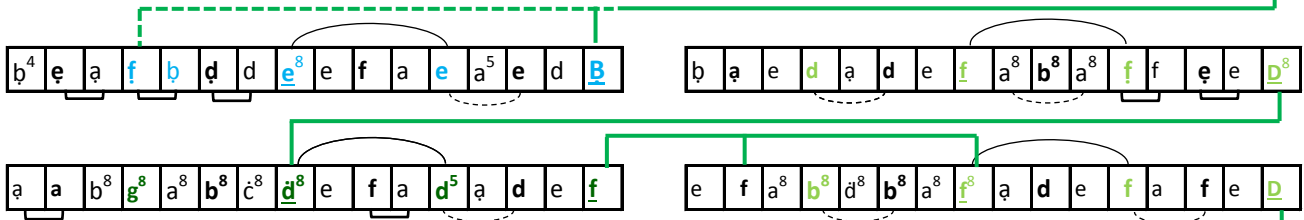

B – 5: Ending of section B [Final Phrase] (P 29 – 32)

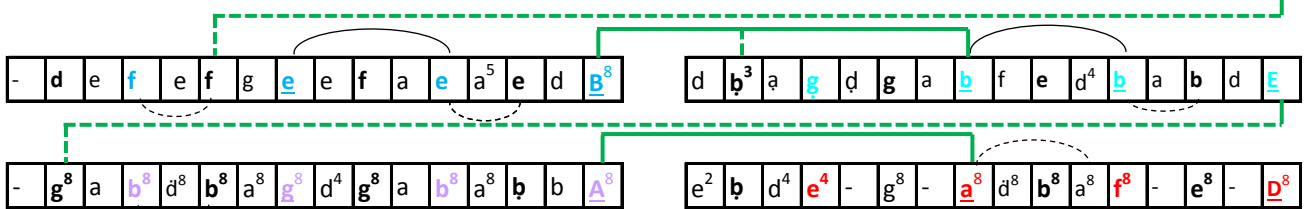

Coda [Transition + Theme I + Final Phrase] (P 51 – 54)

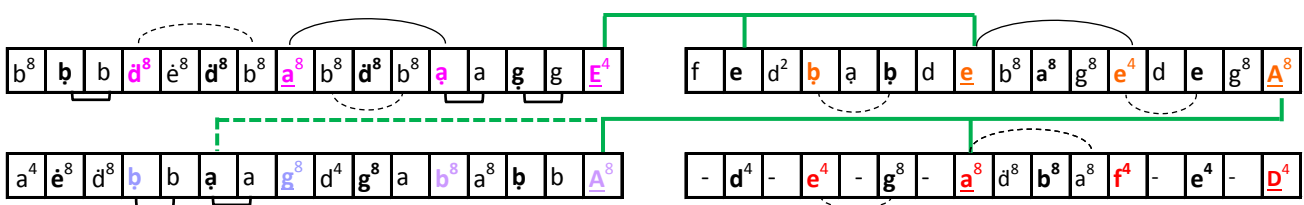

Siri Nakdontri (TN) : Rhyming Structure: Section A [Phrase (P) 0 – 16]

A – 0: Introduction (P0 )



A – 1: Opening phrase (P1) + Theme I (P2 – 4)

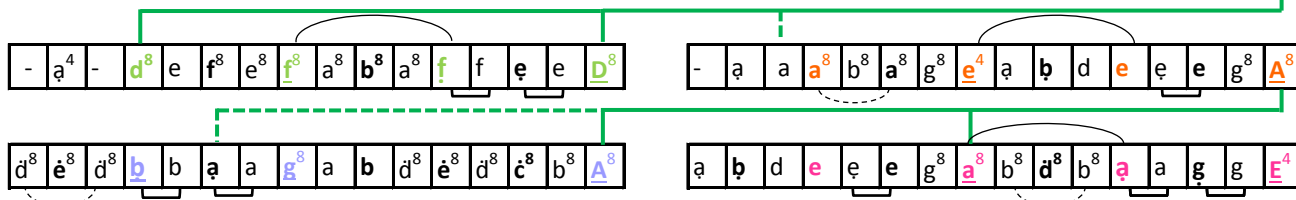

A – 2: Theme II (P 5 – 7)

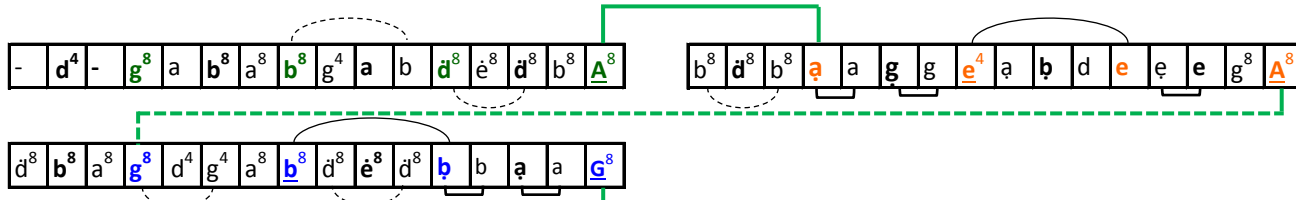

A – 3: Theme III (P 8 – 11)

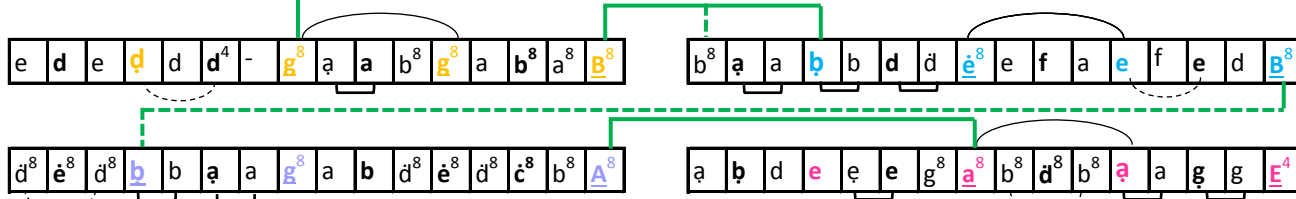

A – 4: Theme I [Repetition] (P 12 – 14)

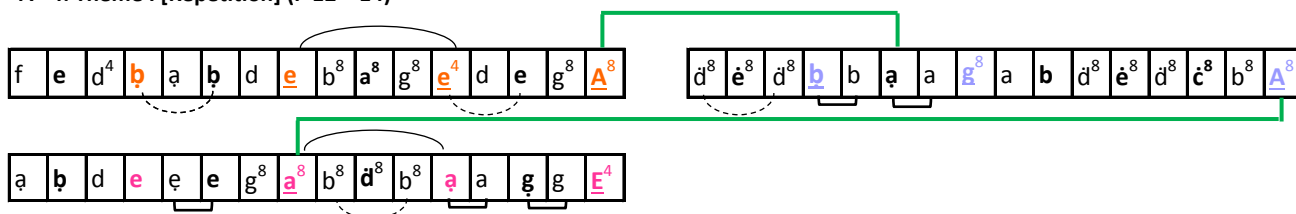

A – 6: Ending of Section A or Introduction of Section B (P 15 – 16)

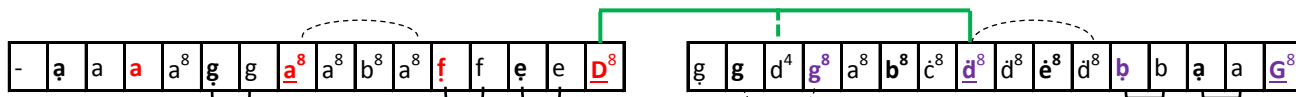



Siri Nakdontri (TN): Rhyming Structure: Section B (Phrase 17 – 32)

B – 1: Transition I (17 – 18)

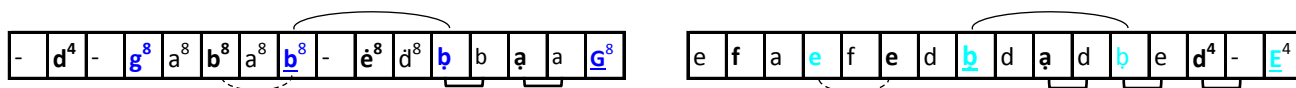

B – 2: Theme IV (P 19 – 22)

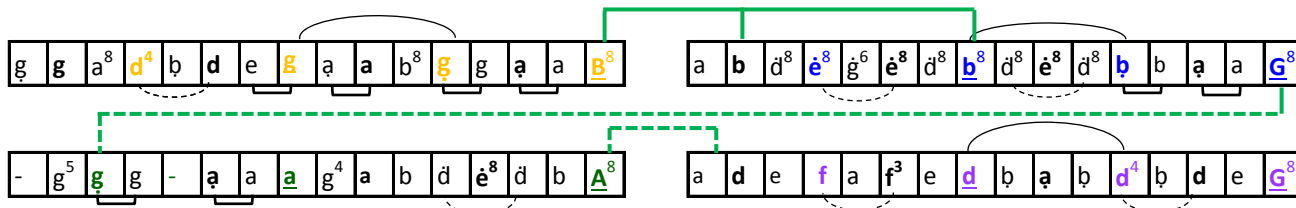

B – 3: Transition II (P 23 – 24)

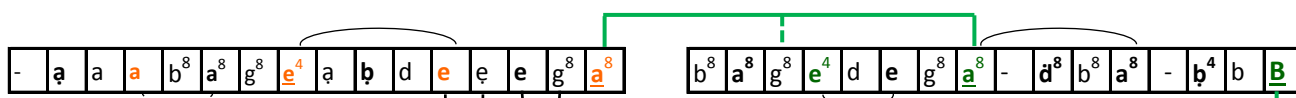

B – 4: Theme V (P 25 – 28)

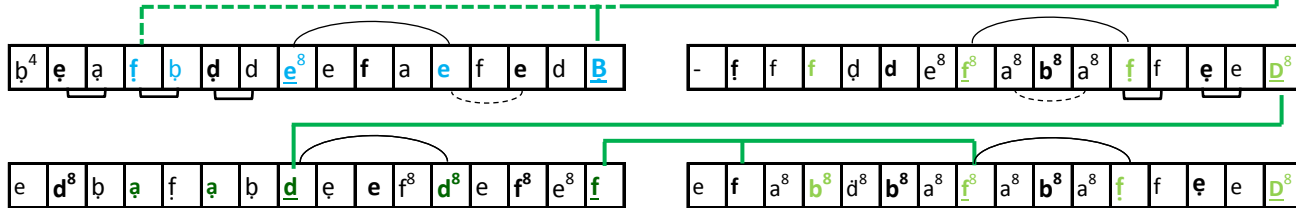

B – 5: Ending of section B [Final Phrase] (P 29 – 32)

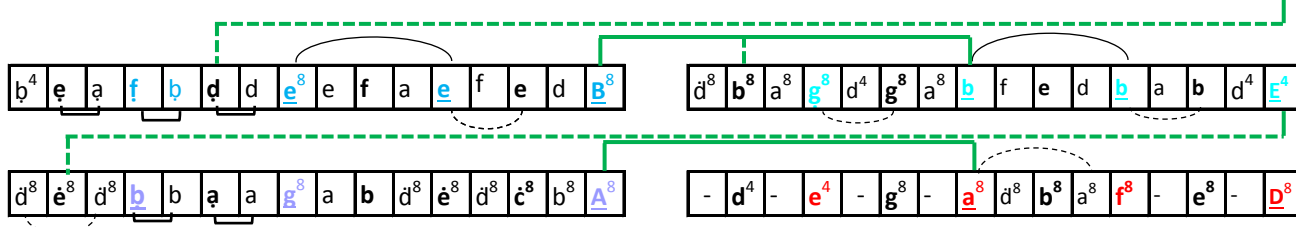

Coda [Transition + Theme I + Final Phrase] (P 51 – 54)

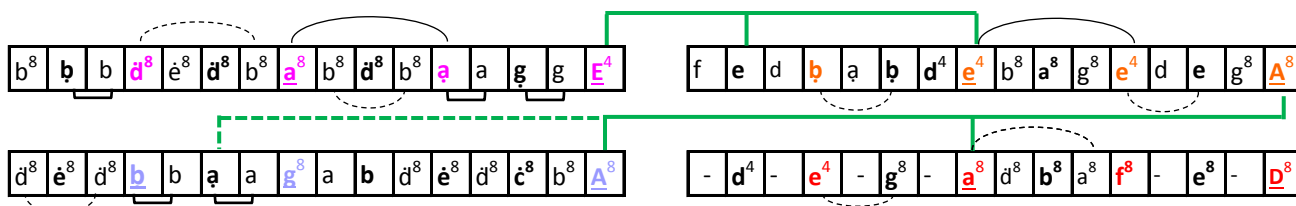

Sangobsuek Dhamvihar [TW]: Rhyming Structure: Section A [Phrase (P) 0 – 16]

A – 0: Introduction (P0 )

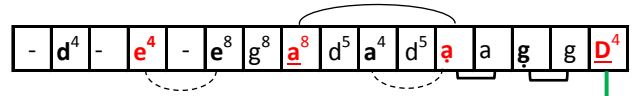

A – 1: Opening phrase (P1) + Theme I (P2 – 4)

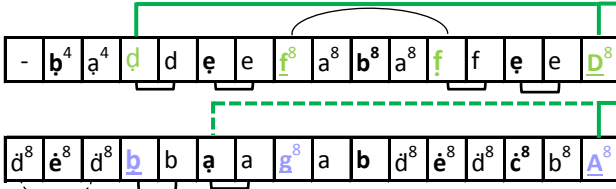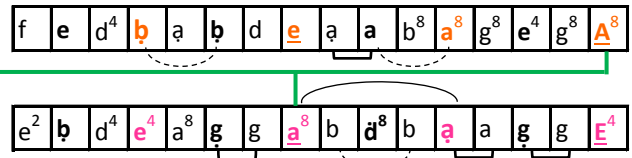

A – 2: Theme II (P 5 – 7)

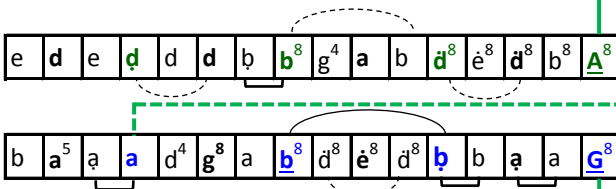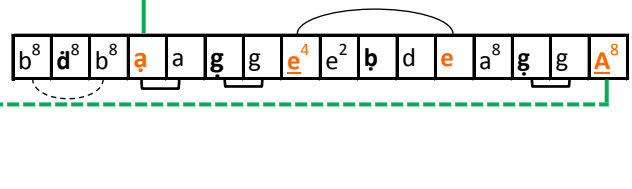

A – 3: Theme III (P 8 – 11)

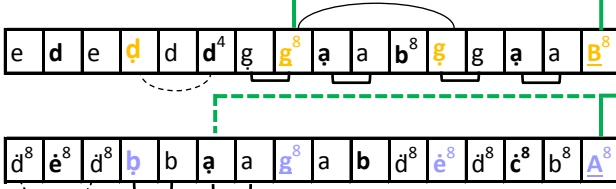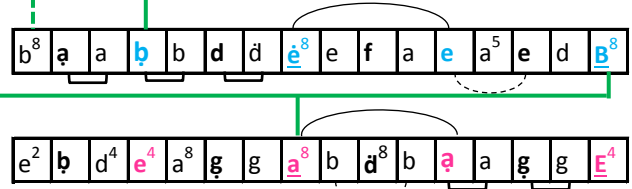

A – 4: Theme I [Repetition] (P 12 – 14)

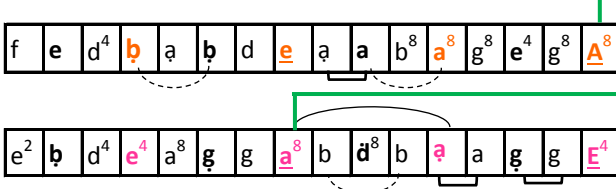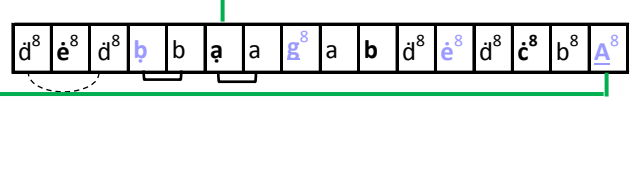

A – 6: Ending of Section A or Introduction of Section B (P 15 – 16)

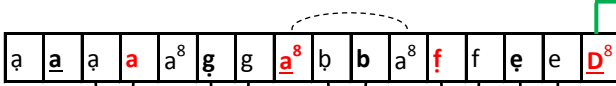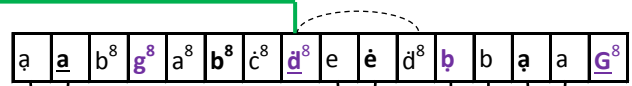

Sangobsuek Dhamvihar [TW]: Rhyming Structure: Section B (Phrase 17 – 32)

B – 1: Transition I (17 – 18)

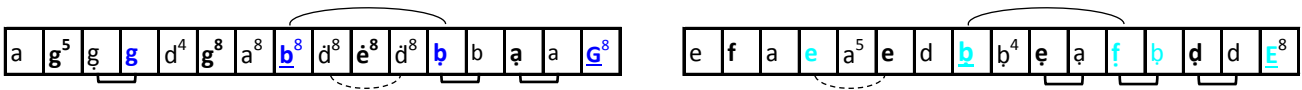

B – 2: Theme IV (P 19 – 22)

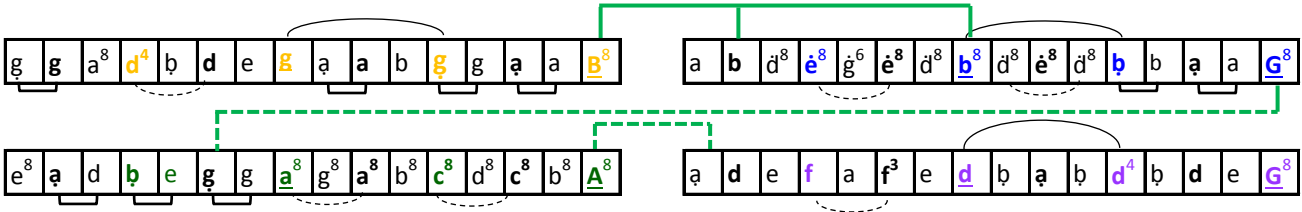

B – 3: Transition II (P 23 – 24)

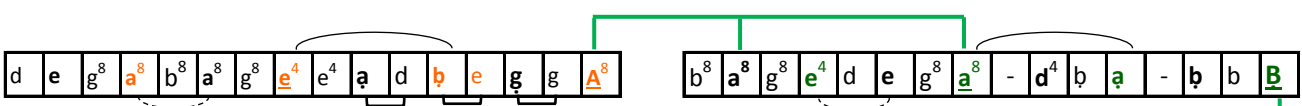

B – 4: Theme V (P 25 – 28)

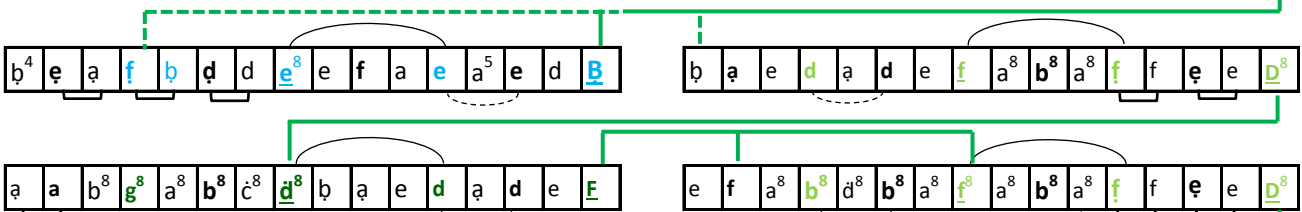

B – 5: Ending of section B [Final Phrase] (P 29 – 32)

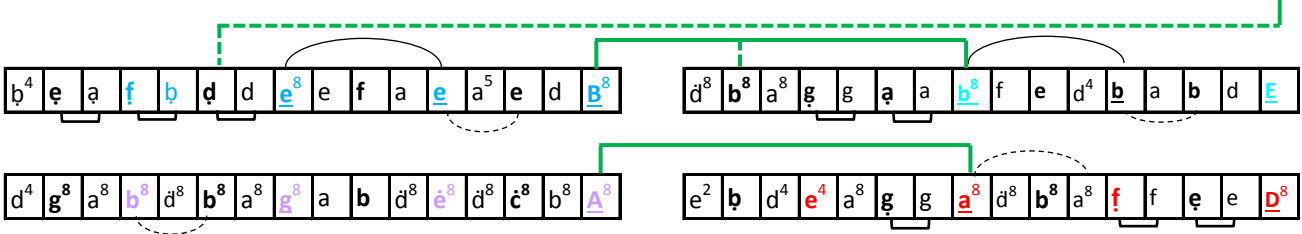

Coda [Transition + Theme I + Final Phrase] (P 51 – 54)

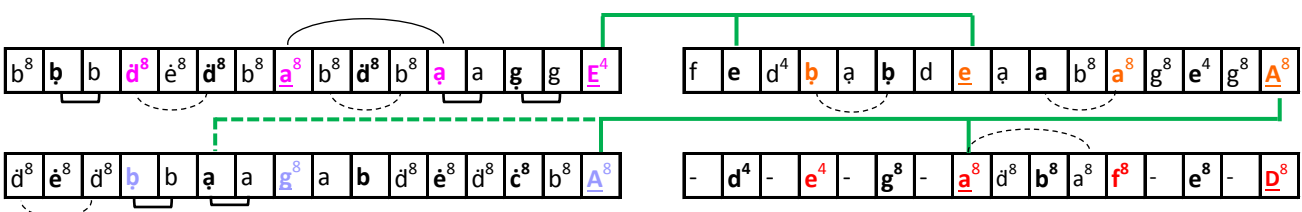

Samran Kerdphol II (TS2): Rhyming Structure: Section A [Phrase (P) 0 – 16]

A – 0: Introduction (P0 )

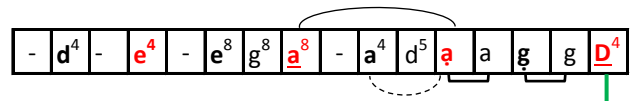

A – 1: Opening phrase (P1) + Theme I (P2 – 4)

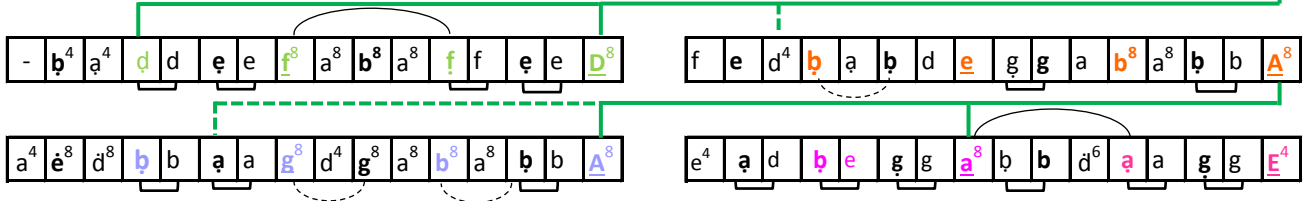

A – 2: Theme II (P 5 – 7)

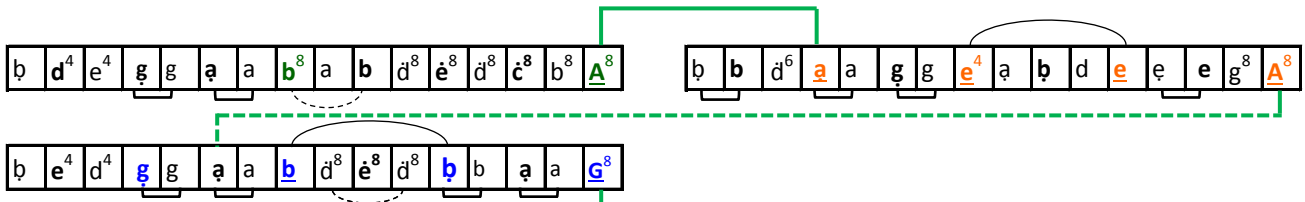

A – 3: Theme III (P 8 – 11)

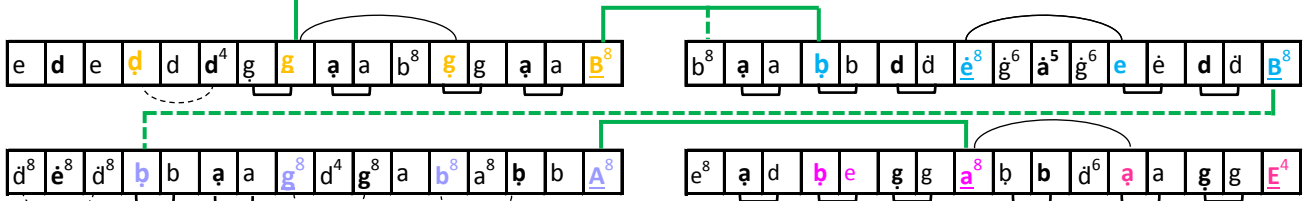

A – 4: Theme I [Repetition] (P 12 – 14)

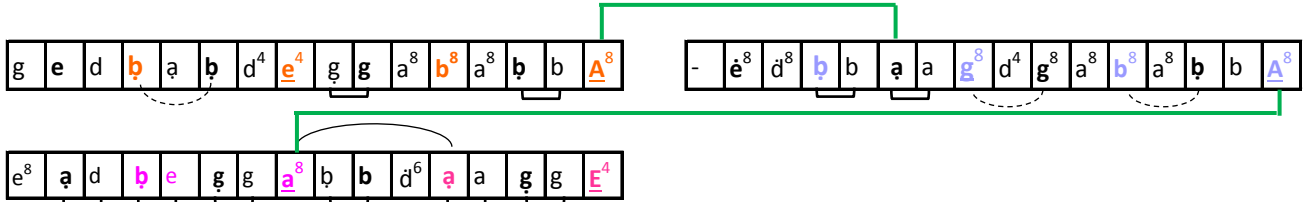

A – 6: Ending of Section A or Introduction of Section B (P 15 – 16)

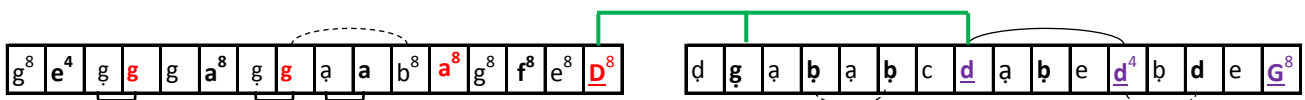

Samran Kerdphol II (TS2): Rhyming Structure: Section B (Phrase 17 – 32)

B – 1: Transition I (17 – 18)

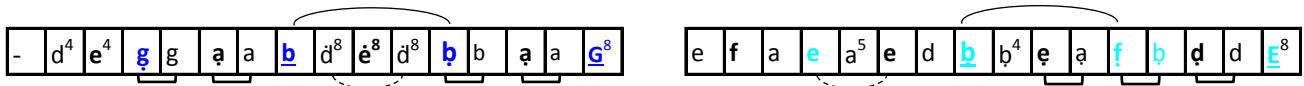

B – 2: Theme IV (P 19 – 22)

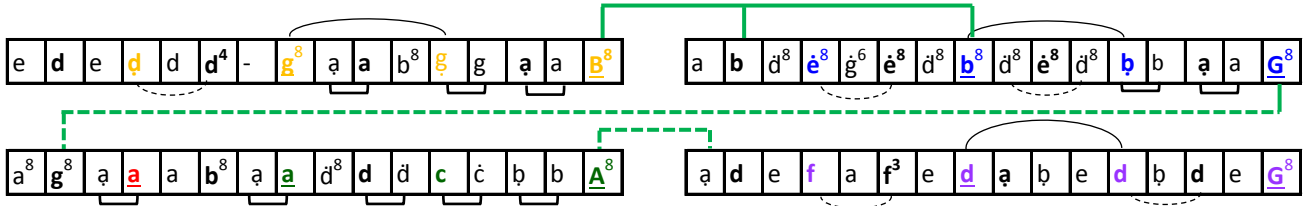

B – 3: Transition II (P 23 – 24)

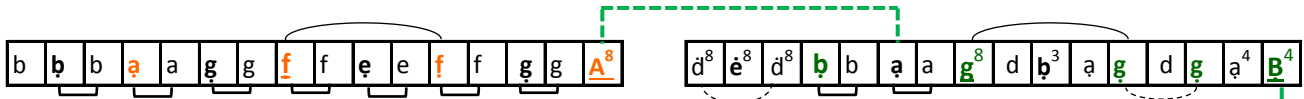

B – 4: Theme V (P 25 – 28)

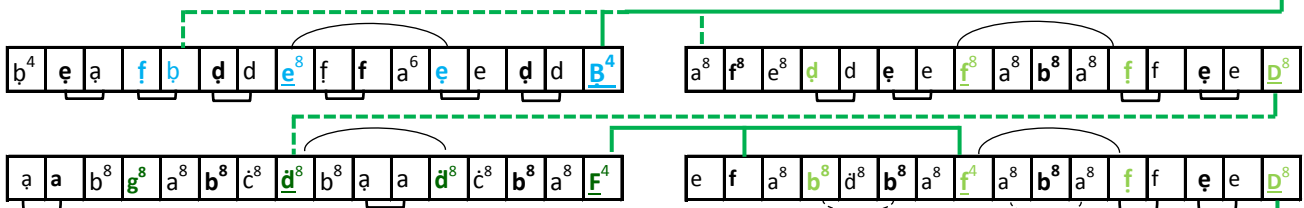

B – 5: Ending of section B [Final Phrase] (P 29 – 32)

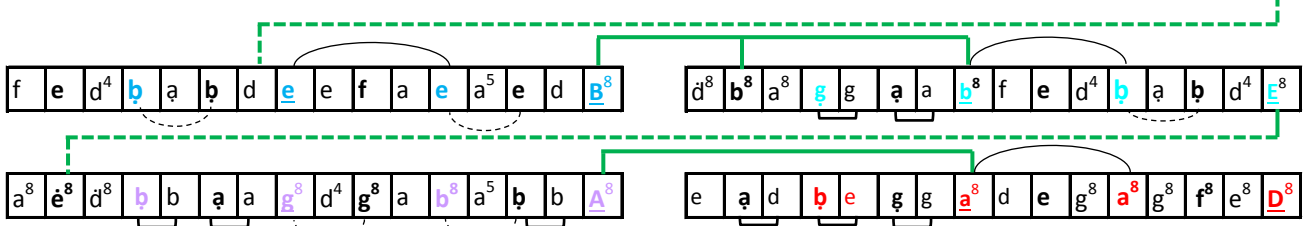

Coda [Transition + Theme I + Final Phrase] (P 51 – 54)

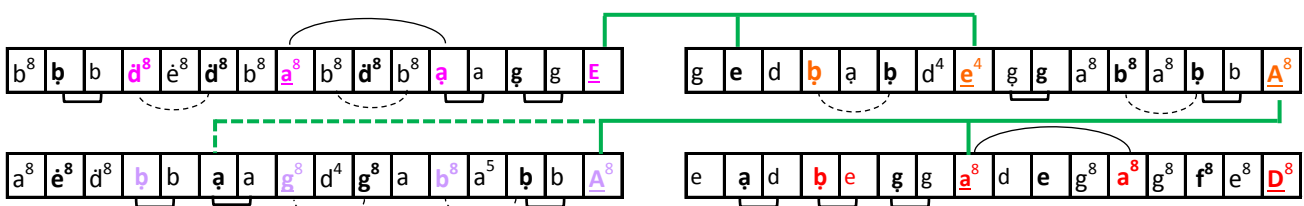

Subin Chankeaw (TJ) : Rhyming Structure: Section A [Phrase (P) 0 – 16]

A – 0: Introduction (P0 )

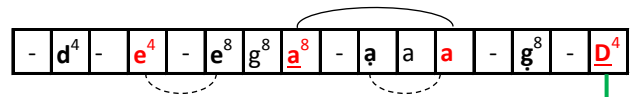

A – 1: Opening phrase (P1) + Theme I (P2 – 4)

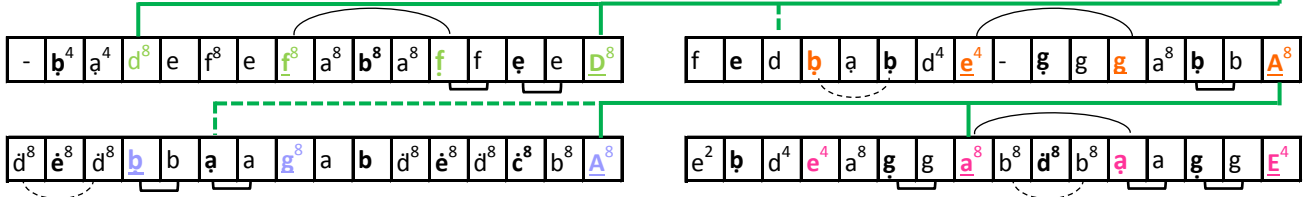

A – 2: Theme II (P 5 – 7)

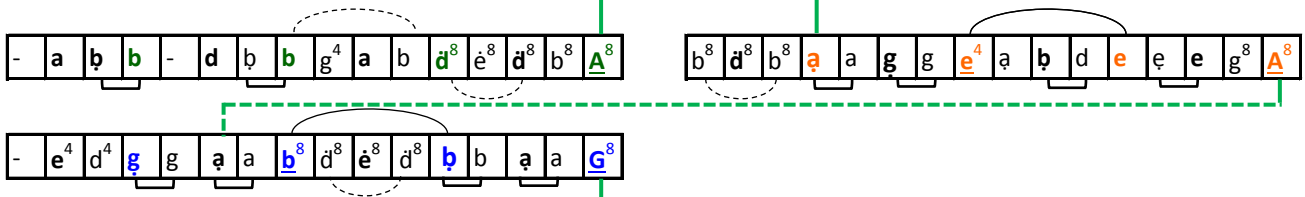

A – 3: Theme III (P 8 – 11)

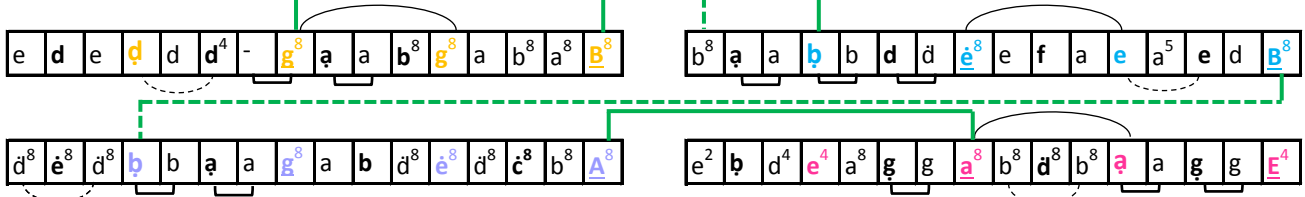

A – 4: Theme I [Repetition] (P 12 – 14)

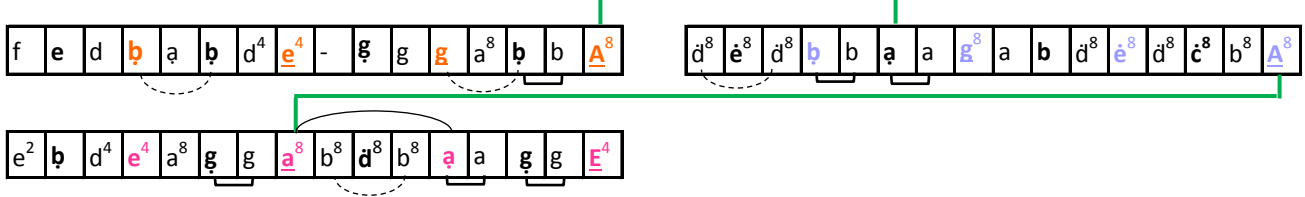

A – 6: Ending of Section A or Introduction of Section B (P 15 – 16)

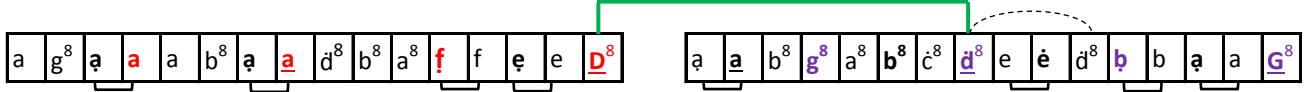

Subin Chankeaw (TJ): Rhyming Structure: Section B (Phrase 17 – 32)

B – 1: Transition I (17 – 18)

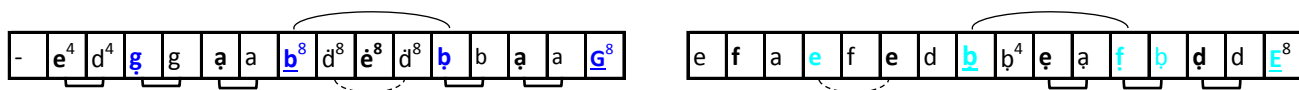

B – 2: Theme IV (P 19 – 22)

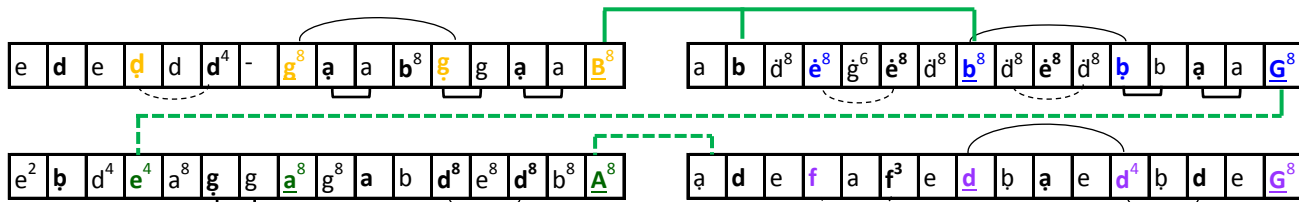

B – 3: Transition II (P 23 – 24)

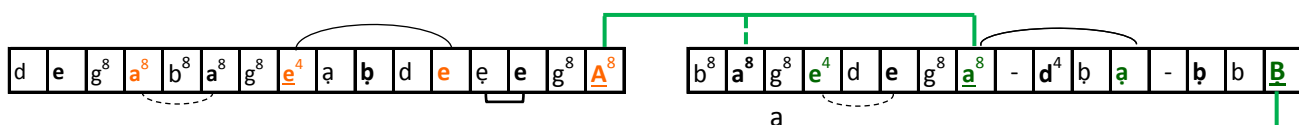

B – 4: Theme V (P 25 – 28)

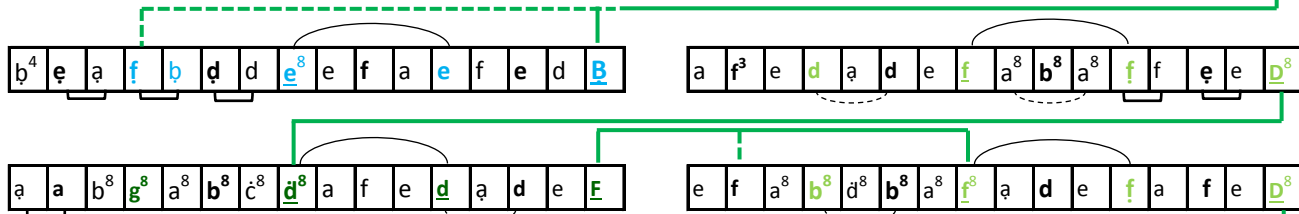

B – 5: Ending of section B [Final Phrase] (P 29 – 32)

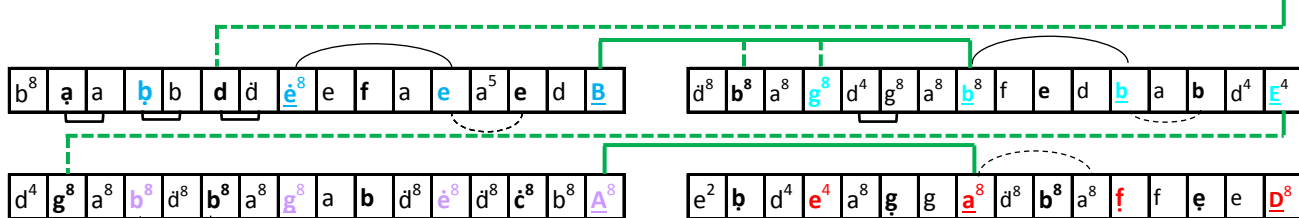

Coda [Transition + Theme I + Final Phrase] (P 51 – 54)

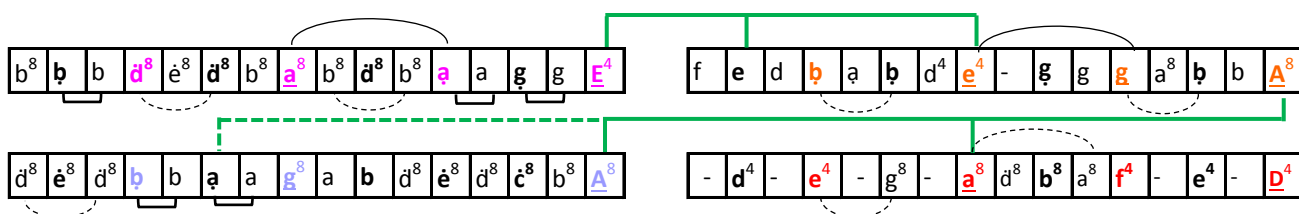

Sadhukarn Chan Diow (TPP): Rhyming Structure: Section A [Phrase (P) 0 – 16]

A:

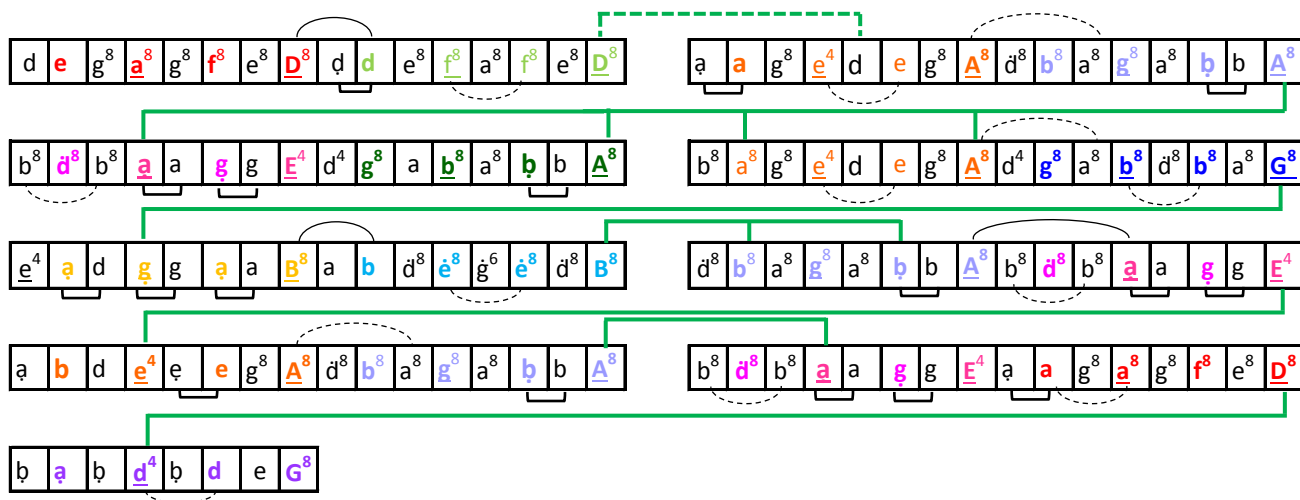

Rhyming Structure: Section B (Phrase 17 – 32)

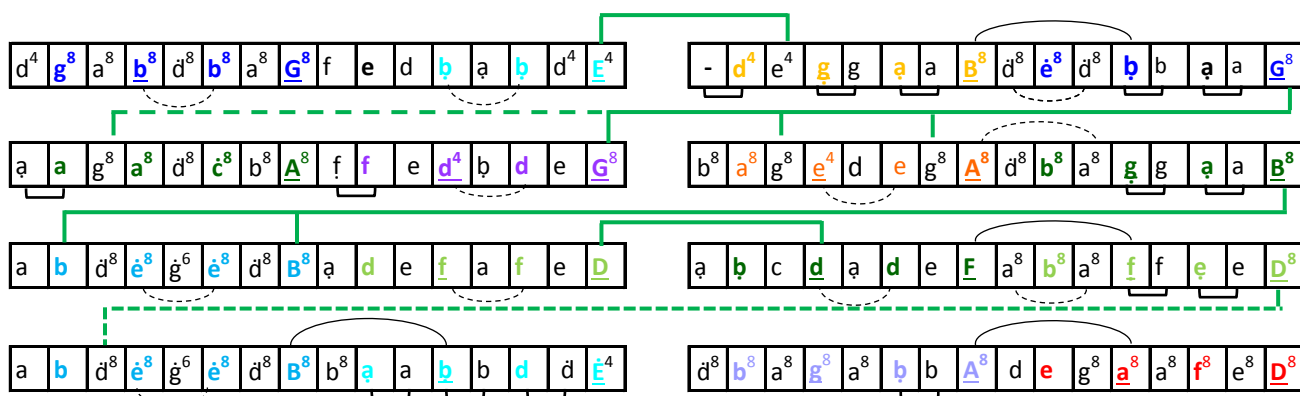

Coda (Phrase 51 - 54)

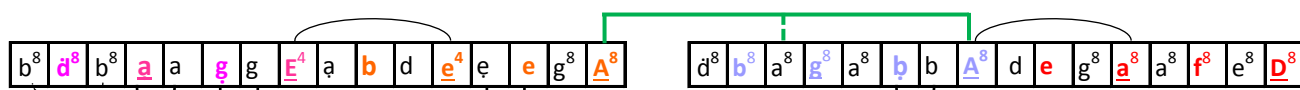



Keo Sananvavai I (KS1) : Rhyming Structure: Section A [Phrase (P) 0 – 4]

A – 0: Introduction (P0 )

|                |   |                |                |   |   |   |                |                |                |                |   |   |   |   |                |
|----------------|---|----------------|----------------|---|---|---|----------------|----------------|----------------|----------------|---|---|---|---|----------------|
| d <sup>8</sup> | b | d <sup>4</sup> | e <sup>4</sup> | g | b | a | a <sup>5</sup> | d <sup>8</sup> | b <sup>8</sup> | a <sup>5</sup> | f | f | e | e | D <sup>4</sup> |
|----------------|---|----------------|----------------|---|---|---|----------------|----------------|----------------|----------------|---|---|---|---|----------------|

A – 1: Opening phrase (P1) + Theme I (P2 – 4)

|                |   |   |   |   |   |   |                |   |   |   |   |   |   |   |   |
|----------------|---|---|---|---|---|---|----------------|---|---|---|---|---|---|---|---|
| b <sup>4</sup> | e | a | d | d | e | e | f <sup>8</sup> | f | b | a | f | d | e | d | D |
|----------------|---|---|---|---|---|---|----------------|---|---|---|---|---|---|---|---|

|                |   |   |   |   |   |                |                |   |   |   |   |   |   |   |   |
|----------------|---|---|---|---|---|----------------|----------------|---|---|---|---|---|---|---|---|
| a <sup>5</sup> | e | d | b | a | b | d <sup>4</sup> | e <sup>4</sup> | a | a | g | e | d | e | g | A |
|----------------|---|---|---|---|---|----------------|----------------|---|---|---|---|---|---|---|---|

|   |   |   |   |                |                |                |                |   |   |   |   |   |                |                |                |
|---|---|---|---|----------------|----------------|----------------|----------------|---|---|---|---|---|----------------|----------------|----------------|
| d | g | b | b | d <sup>6</sup> | b <sup>8</sup> | a <sup>8</sup> | g <sup>8</sup> | c | c | d | e | d | c <sup>8</sup> | b <sup>8</sup> | A <sup>8</sup> |
|---|---|---|---|----------------|----------------|----------------|----------------|---|---|---|---|---|----------------|----------------|----------------|

|   |                |   |                |   |                |                |                |   |   |   |   |   |   |   |                |
|---|----------------|---|----------------|---|----------------|----------------|----------------|---|---|---|---|---|---|---|----------------|
| d | d <sup>4</sup> | - | e <sup>4</sup> | - | g <sup>8</sup> | b <sup>8</sup> | a <sup>8</sup> | d | b | a | f | f | e | e | D <sup>4</sup> |
|---|----------------|---|----------------|---|----------------|----------------|----------------|---|---|---|---|---|---|---|----------------|

Keo Sananvavai II (KS2) : Rhyming Structure: Section A [Phrase (P) 0 – 16]

A – 0: Introduction (P0 )

d<sup>8</sup> b d<sup>4</sup> e<sup>4</sup> g b a a<sup>5</sup> d b<sup>8</sup> a<sup>8</sup> f f f e D

A – 1: Opening phrase (P1) + Theme I (P2 – 4)

d a b d a d e f<sup>8</sup> e f a b a f e D

f e d b a b d<sup>4</sup> e<sup>4</sup> a g e e d e g A

- g a b d<sup>6</sup> b a<sup>8</sup> g<sup>8</sup> c c d e d c<sup>8</sup> b<sup>8</sup> A<sup>8</sup>

e<sup>4</sup> a d b e g g a b b d<sup>6</sup> a d<sup>6</sup> a g E<sup>4</sup>

A – 2: Theme II (P 5 – 7)

d g b b g g a b g a b d g b d<sup>6</sup> A

d e g a b a<sup>8</sup> g<sup>8</sup> e<sup>4</sup> e<sup>4</sup> a d b e g g A

e d d g g a a b g g a b d<sup>6</sup> b<sup>8</sup> a<sup>8</sup> G<sup>4</sup>

A – 3: Theme III (P 8 – 11)

e f g d<sup>5</sup> b d e g e d d g g a a B

a g a b a g f e d f a e f e d B<sup>8</sup>

d g a b d<sup>6</sup> b a<sup>8</sup> g<sup>8</sup> c c d e d c<sup>8</sup> b<sup>8</sup> A<sup>8</sup>

e<sup>4</sup> a d b e g g a b b d<sup>6</sup> a d<sup>6</sup> a g E<sup>4</sup>

A – 4: Theme II (P 12 – 14)

b<sup>8</sup> a<sup>8</sup> b b b g a b g a b c g b d<sup>6</sup> A

e e g a b a<sup>8</sup> g<sup>8</sup> e<sup>4</sup> e<sup>4</sup> a d b e g g A

g<sup>8</sup> e<sup>4</sup> g g d g a b g g a b d<sup>6</sup> b<sup>8</sup> a<sup>8</sup> G<sup>4</sup>

A – 3: Theme III (P 15 – 18)

f e d d b d e g g d e g d g a B

d b a g a b d<sup>4</sup> e<sup>4</sup> f f a e<sup>4</sup> d g a B<sup>8</sup>

g g a b d<sup>6</sup> b a<sup>8</sup> g<sup>8</sup> c c d e d c<sup>8</sup> b<sup>8</sup> A<sup>8</sup>

b<sup>8</sup> a<sup>8</sup> g<sup>8</sup> e<sup>4</sup> d<sup>4</sup> g b a a d e f<sup>4</sup> - b a D<sup>4</sup>

Royal University of Fine Arts (KR) : Rhyming Structure: Section A [Phrase (P) 0 – 16]

A – 0: Introduction (P0)

- d<sup>4</sup> - e<sup>4</sup> - g - a<sup>5</sup> - - - f<sup>4</sup> d d d D<sup>4</sup>

A – 1: Opening phrase (P1) + Theme I (P2 – 4)

d<sup>8</sup> b è ḋ b a f f<sup>8</sup> f b a f e ḋ d D  
 f e d ḃ a ḃ d<sup>4</sup> e<sup>4</sup> a a g e d e g A  
 d ḃ b ḃ a f g ġ ċ ċ ḋ è ḋ ċ b A  
 d ḃ d e g b d<sup>6</sup> a<sup>8</sup> ḃ ḃ d<sup>6</sup> a b a g<sup>8</sup> E<sup>4</sup>

A – 2: Theme II (P 5 – 7)

b ḃ b ḃ a<sup>8</sup> g<sup>8</sup> a<sup>8</sup> ḃ g<sup>8</sup> g<sup>4</sup> a b ḋ<sup>8</sup> è ḋ b<sup>8</sup> A<sup>8</sup>  
 b e g a b a g e<sup>4</sup> e<sup>4</sup> a d ḃ e ġ ġ A<sup>8</sup>  
 e ḋ ḋ ġ ġ a a ḃ ḋ<sup>6</sup> e<sup>5</sup> ḋ<sup>6</sup> ḃ<sup>8</sup> a<sup>8</sup> ġ ġ G<sup>4</sup>

A – 3: Theme III (P 8 – 11)

f f e<sup>8</sup> d<sup>4</sup> ḃ d<sup>4</sup> e<sup>4</sup> g<sup>8</sup> ḃ d e ġ ġ a a B  
 a a ḃ ḃ<sup>8</sup> ḋ ḋ e è ḃ a f e a<sup>5</sup> e d B  
 d ḃ ḃ ḃ a f g ġ ċ ċ ḋ è ḋ ċ b A  
 d ḃ d e ġ b d<sup>6</sup> a<sup>8</sup> ḃ ḃ d<sup>6</sup> a a<sup>8</sup> ġ g<sup>8</sup> E<sup>4</sup>

A – 4: Theme I [Repetition] (P 12 – 14)

f e d ḃ a ḃ d<sup>4</sup> e<sup>4</sup> a a g e d e g A  
 d ḃ ḃ ḃ a f g ġ ċ ċ ḋ è ḋ ċ b A  
 d ḃ d e ġ b d<sup>6</sup> a<sup>8</sup> ḃ ḃ d<sup>6</sup> a a<sup>8</sup> ġ g<sup>8</sup> E<sup>4</sup>

A – 6: Ending of Section A or Introduction of Section B (P 15 – 16)

a<sup>8</sup> a a a g b d<sup>6</sup> a<sup>8</sup> ḋ ḋ a ḟ e<sup>8</sup> ḋ ḋ D  
 g<sup>5</sup> a ġ ḋ a ḃ ċ ḋ a ḃ e d<sup>4</sup> ḃ ḋ e G

Royal University of Fine Arts (KR): Rhyming Structure: Section B (Phrase 17 – 32)

B – 1: Transition I (17 – 18)

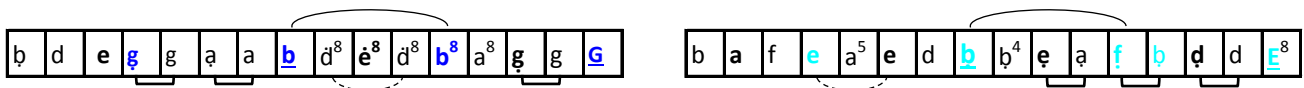

B – 2: Theme IV (P 19 – 22)

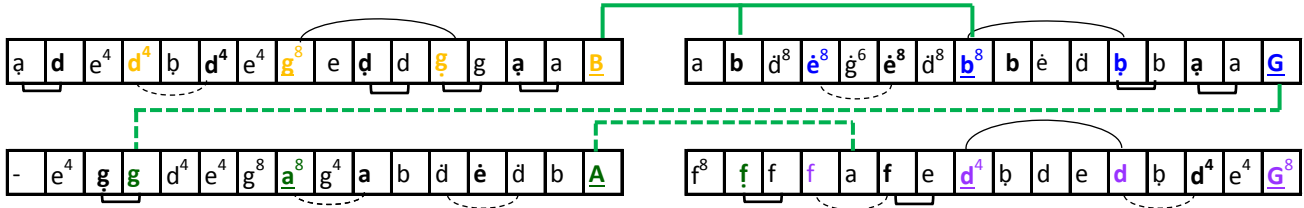

B – 3: Transition II (P 23 – 24)

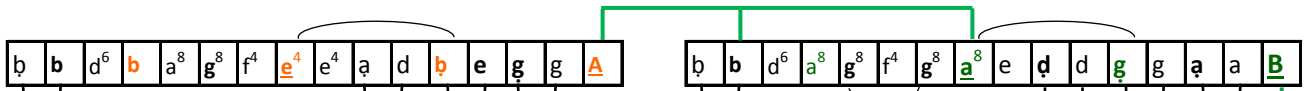

B – 4: Theme V (P 25 – 28)

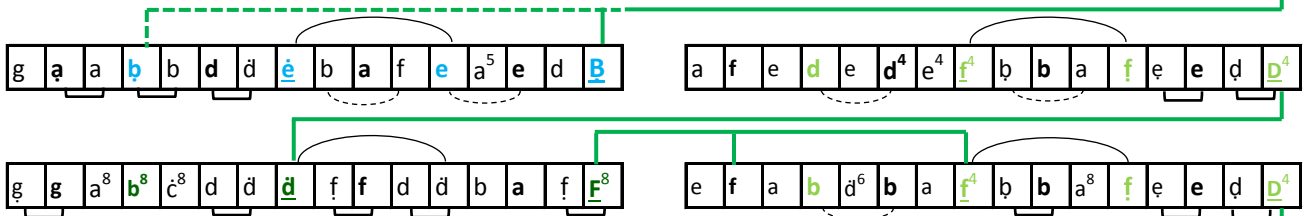

B – 5: Ending of section B [Final Phrase] (P 29 – 32)

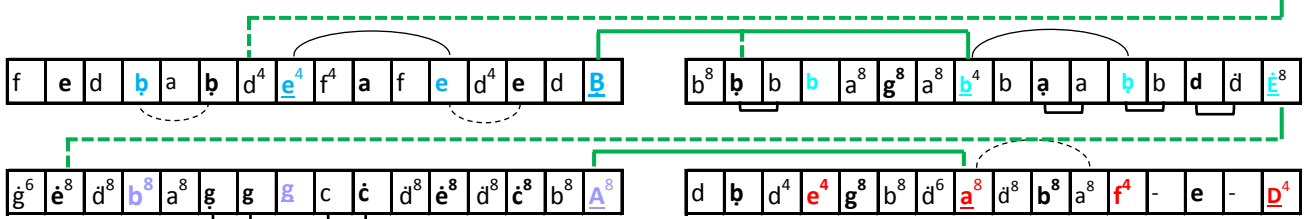

Ban Panglang (IP) : Rhyming Structure: Section A [Phrase (P) 0 – 16]

A – 0: Introduction (P0 )

- d<sup>4</sup> - e<sup>4</sup> - g<sup>8</sup> - a<sup>8</sup> d<sup>8</sup> b<sup>8</sup> a<sup>8</sup> f<sup>4</sup> - e<sup>4</sup> - D<sup>4</sup>

A – 1: Opening phrase (P1) + Theme I (P2 – 4)

- b<sup>4</sup> a<sup>4</sup> d d e f<sup>8</sup> a<sup>8</sup> b<sup>8</sup> a<sup>8</sup> f f e e D<sup>4</sup>

- a a a<sup>8</sup> g<sup>8</sup> b b a<sup>8</sup> c c d<sup>8</sup> e<sup>8</sup> d<sup>8</sup> c<sup>8</sup> b<sup>8</sup> A<sup>8</sup>

d<sup>8</sup> e<sup>8</sup> d<sup>8</sup> b b a a g<sup>8</sup> d<sup>4</sup> g<sup>8</sup> a<sup>8</sup> b<sup>8</sup> e<sup>8</sup> d<sup>8</sup> b<sup>8</sup> A<sup>8</sup>

d b d e g g b a<sup>8</sup> b b b<sup>8</sup> a a<sup>8</sup> g g<sup>8</sup> E<sup>4</sup>

A – 2: Theme II (P 5 – 7)

d e g d b d b b g g a<sup>8</sup> b<sup>8</sup> e<sup>8</sup> d<sup>8</sup> b<sup>8</sup> A<sup>8</sup>

g g a<sup>8</sup> b<sup>8</sup> a<sup>8</sup> g<sup>8</sup> f<sup>4</sup> e<sup>4</sup> d b d<sup>4</sup> e<sup>4</sup> g g<sup>8</sup> b<sup>8</sup> A<sup>8</sup>

d<sup>4</sup> e<sup>4</sup> g b b<sup>4</sup> a<sup>8</sup> b b d<sup>8</sup> e<sup>8</sup> d<sup>8</sup> b b a a G<sup>4</sup>

A – 3: Theme III (P 8 – 11)

d e g d b d g g<sup>8</sup> d<sup>8</sup> b<sup>8</sup> a<sup>8</sup> g g a a B<sup>8</sup>

g g a<sup>8</sup> b<sup>8</sup> a<sup>8</sup> g<sup>8</sup> d<sup>4</sup> e<sup>4</sup> f a f e f e d B

d<sup>8</sup> e<sup>8</sup> d<sup>8</sup> b b a a g<sup>8</sup> d<sup>4</sup> g<sup>8</sup> a<sup>8</sup> b<sup>8</sup> e<sup>8</sup> d<sup>8</sup> b<sup>8</sup> A<sup>8</sup>

d b d e g g b a<sup>8</sup> b b b<sup>8</sup> a a<sup>8</sup> g g<sup>8</sup> E<sup>4</sup>

A– 4: Theme I [Repetition] (P 12 – 14)

f e d b a b d<sup>4</sup> e<sup>4</sup> d<sup>4</sup> g<sup>8</sup> a<sup>8</sup> b<sup>8</sup> e<sup>8</sup> d<sup>8</sup> b<sup>8</sup> A<sup>8</sup>

d<sup>8</sup> e<sup>8</sup> d<sup>8</sup> b b a a g<sup>8</sup> d<sup>4</sup> g<sup>8</sup> a<sup>8</sup> b<sup>8</sup> e<sup>8</sup> d<sup>8</sup> b<sup>8</sup> A<sup>8</sup>

d b d e g g b a<sup>8</sup> b b b<sup>8</sup> a a<sup>8</sup> g g<sup>8</sup> E<sup>4</sup>

A – 6: Ending of Section A or Introduction of Section B (P 15 – 16)

a a a a<sup>8</sup> f f g<sup>8</sup> a<sup>8</sup> b b a<sup>8</sup> f f<sup>8</sup> e e<sup>8</sup> D<sup>8</sup>

a a b<sup>8</sup> g<sup>8</sup> a<sup>8</sup> b<sup>8</sup> c<sup>8</sup> d<sup>8</sup> g g a<sup>8</sup> b<sup>8</sup> d<sup>8</sup> b<sup>8</sup> a<sup>8</sup> G<sup>4</sup>

Ban Panglang (IP): Rhyming Structure: Section B (Phrase 17 – 32)

B – 1: Transition I (17 – 18)

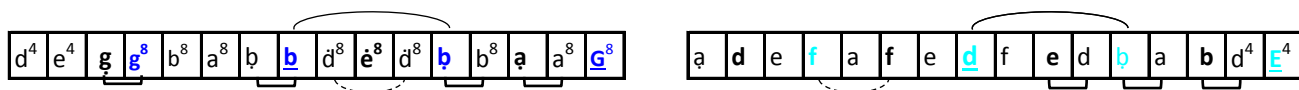

B – 2: Theme IV (P 19 – 22)

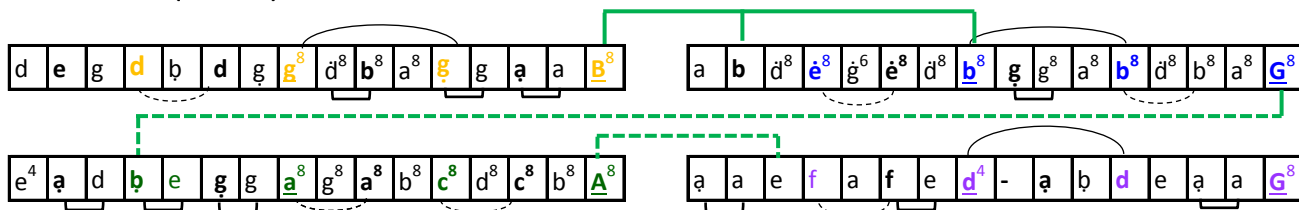

B – 3: Transition II (P 23 – 24)

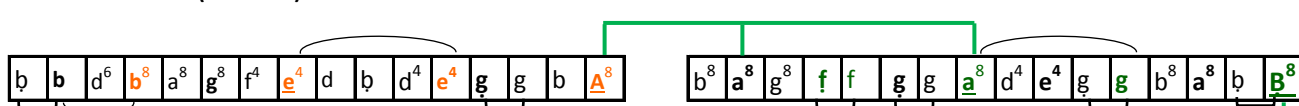

B – 4: Theme V (P 25 – 28)

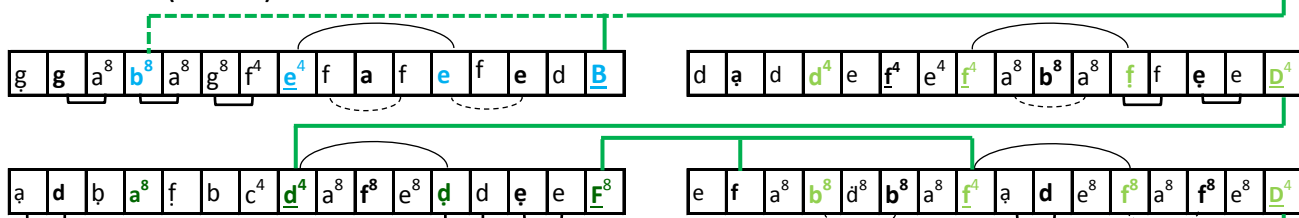

B – 5: Ending of section B [Final Phrase] (P 29 – 32)

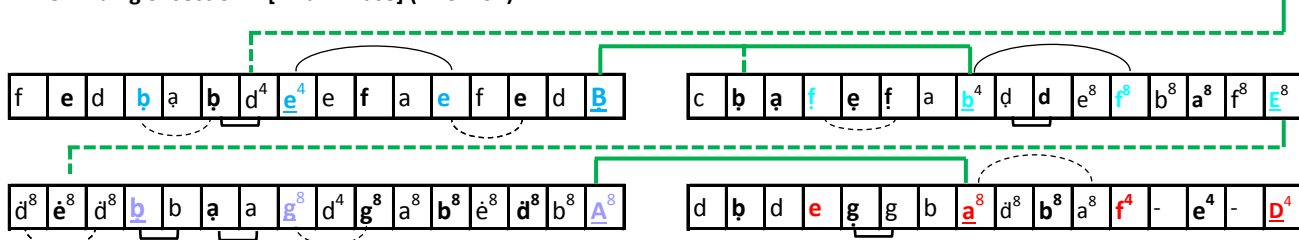

Ban Nongsai (IN) : Rhyming Structure: Section A [Phrase (P) 0 – 16]

A – 0: Introduction (P0 )

- d<sup>4</sup> - e<sup>4</sup> a<sup>8</sup> b<sup>8</sup> b<sup>8</sup> a<sup>8</sup> c<sup>8</sup> f<sup>4</sup> b<sup>8</sup> e<sup>4</sup> D<sup>4</sup>

A – 1: Opening phrase (P1) + Theme I (P2 – 4)

d a<sup>4</sup> d<sup>4</sup> d<sup>4</sup> e<sup>4</sup> f<sup>4</sup> e<sup>4</sup> f<sup>4</sup> a<sup>8</sup> b<sup>8</sup> a<sup>8</sup> c<sup>8</sup> f<sup>4</sup> b<sup>8</sup> e<sup>4</sup> D<sup>4</sup>

a<sup>8</sup> g<sup>8</sup> a<sup>8</sup> a<sup>8</sup> b<sup>8</sup> a<sup>8</sup> a<sup>8</sup> g<sup>8</sup> a<sup>8</sup> b<sup>8</sup> c<sup>8</sup> d<sup>8</sup> c<sup>8</sup> b<sup>8</sup> A<sup>8</sup>

d<sup>8</sup> e<sup>8</sup> d<sup>8</sup> b<sup>8</sup> b<sup>8</sup> a<sup>8</sup> a<sup>8</sup> g<sup>8</sup> c<sup>8</sup> c<sup>8</sup> d<sup>8</sup> e<sup>8</sup> d<sup>8</sup> c<sup>8</sup> b<sup>8</sup> A<sup>8</sup>

a<sup>8</sup> b<sup>8</sup> d<sup>4</sup> e<sup>4</sup> g<sup>8</sup> g<sup>8</sup> b<sup>8</sup> a<sup>8</sup> d<sup>8</sup> b<sup>8</sup> a<sup>8</sup> d<sup>8</sup> a<sup>8</sup> g<sup>8</sup> E<sup>4</sup>

A – 2: Theme II (P 5 – 7)

e d e a<sup>4</sup> d d<sup>4</sup> - b<sup>8</sup> g<sup>8</sup> g<sup>8</sup> a<sup>8</sup> b<sup>8</sup> a<sup>8</sup> d<sup>6</sup> b<sup>8</sup> A<sup>8</sup>

g<sup>8</sup> g<sup>8</sup> a<sup>8</sup> b<sup>8</sup> a<sup>8</sup> g<sup>8</sup> f<sup>4</sup> e<sup>4</sup> a<sup>8</sup> b<sup>8</sup> d<sup>4</sup> e<sup>4</sup> a<sup>8</sup> g<sup>8</sup> A<sup>8</sup>

e<sup>4</sup> d<sup>8</sup> g<sup>8</sup> g<sup>8</sup> b<sup>4</sup> a<sup>8</sup> a<sup>8</sup> b<sup>8</sup> d<sup>6</sup> e<sup>5</sup> d<sup>6</sup> b<sup>8</sup> b<sup>8</sup> a<sup>8</sup> a<sup>8</sup> G<sup>8</sup>

A – 3: Theme III (P 8 – 11)

e d e a<sup>4</sup> d d<sup>4</sup> - g<sup>8</sup> e<sup>4</sup> a<sup>8</sup> d<sup>4</sup> g<sup>8</sup> g<sup>8</sup> a<sup>8</sup> a<sup>8</sup> B<sup>8</sup>

g<sup>8</sup> g<sup>8</sup> a<sup>8</sup> b<sup>8</sup> a<sup>8</sup> b<sup>8</sup> d<sup>4</sup> e<sup>4</sup> f<sup>4</sup> a<sup>8</sup> f<sup>4</sup> e<sup>4</sup> f<sup>4</sup> e<sup>4</sup> d<sup>8</sup> B<sup>8</sup>

d<sup>8</sup> e<sup>8</sup> d<sup>8</sup> b<sup>8</sup> b<sup>8</sup> a<sup>8</sup> a<sup>8</sup> g<sup>8</sup> d<sup>4</sup> g<sup>8</sup> a<sup>8</sup> b<sup>8</sup> e<sup>8</sup> d<sup>8</sup> b<sup>8</sup> A<sup>8</sup>

a<sup>8</sup> b<sup>8</sup> d<sup>8</sup> e<sup>8</sup> g<sup>8</sup> g<sup>8</sup> b<sup>8</sup> a<sup>8</sup> b<sup>8</sup> d<sup>6</sup> b<sup>8</sup> a<sup>8</sup> a<sup>8</sup> g<sup>8</sup> E<sup>4</sup>

A – 4: Theme I [Repetition] (P 12 – 14)

g e d b<sup>8</sup> a<sup>8</sup> b<sup>8</sup> d<sup>4</sup> e<sup>4</sup> g<sup>8</sup> g<sup>8</sup> a<sup>8</sup> b<sup>8</sup> a<sup>8</sup> d<sup>6</sup> b<sup>8</sup> A<sup>8</sup>

d<sup>6</sup> e<sup>5</sup> d<sup>6</sup> b<sup>8</sup> b<sup>8</sup> a<sup>8</sup> a<sup>8</sup> g<sup>8</sup> c<sup>8</sup> c<sup>8</sup> d<sup>8</sup> e<sup>8</sup> d<sup>8</sup> c<sup>8</sup> b<sup>8</sup> A<sup>8</sup>

d b<sup>8</sup> d<sup>8</sup> e<sup>8</sup> g<sup>8</sup> g<sup>8</sup> b<sup>8</sup> a<sup>8</sup> b<sup>8</sup> d<sup>6</sup> b<sup>8</sup> a<sup>8</sup> a<sup>8</sup> g<sup>8</sup> E<sup>4</sup>

A – 6: Ending of Section A or Introduction of Section B (P 15 – 16)

g<sup>8</sup> e<sup>4</sup> g<sup>8</sup> g<sup>8</sup> a<sup>8</sup> g<sup>8</sup> b<sup>8</sup> d<sup>8</sup> e<sup>8</sup> f<sup>4</sup> a<sup>8</sup> f<sup>4</sup> e<sup>4</sup> D<sup>4</sup>

a<sup>8</sup> a<sup>8</sup> b<sup>8</sup> g<sup>8</sup> a<sup>8</sup> b<sup>8</sup> c<sup>8</sup> d<sup>8</sup> g<sup>8</sup> g<sup>8</sup> a<sup>8</sup> b<sup>8</sup> d<sup>6</sup> b<sup>8</sup> a<sup>8</sup> G<sup>4</sup>

Ban Nongsai (IN): Rhyming Structure: Section B (Phrase 17 – 32)

B – 1: Transition I (17 – 18)

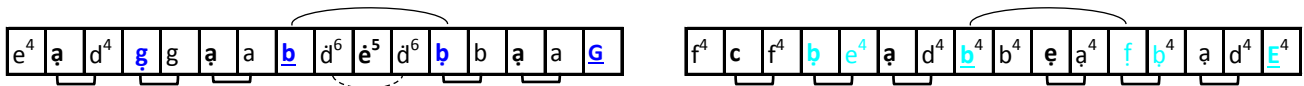

B – 2: Theme IV (P 19 – 22)

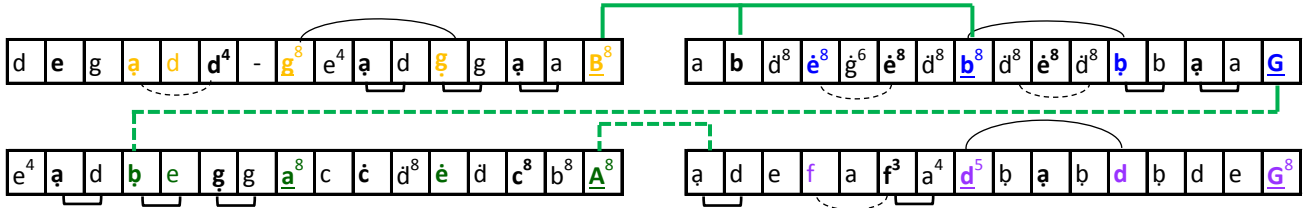

B – 3: Transition II (P 23 – 24)

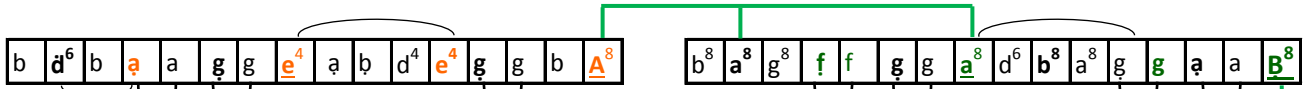

B – 4: Theme V (P 25 – 28)

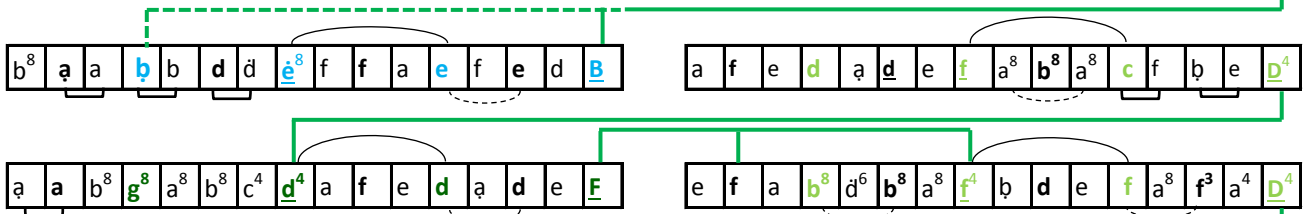

B – 5: Ending of section B [Final Phrase] (P 29 – 32)

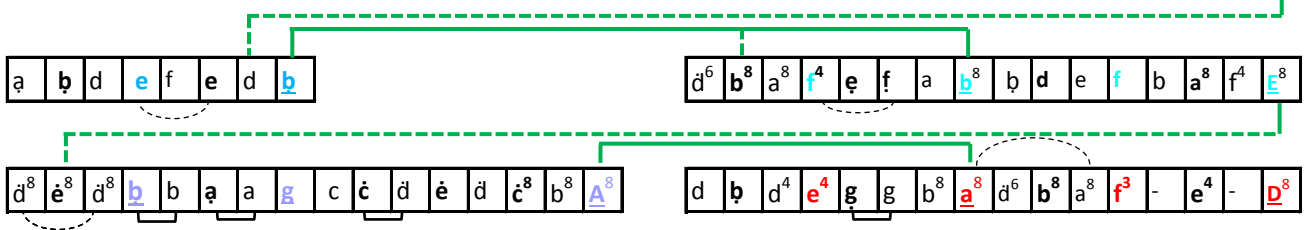



Bunthieng Sisakda I (LB1) : Rhyming Structure: Section A [Phrase (P) 0 – 16]

A – 0: Introduction (P0)

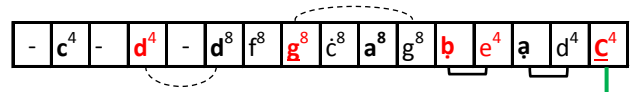

A – 1: Opening phrase (P1) + Theme I (P2 – 4)

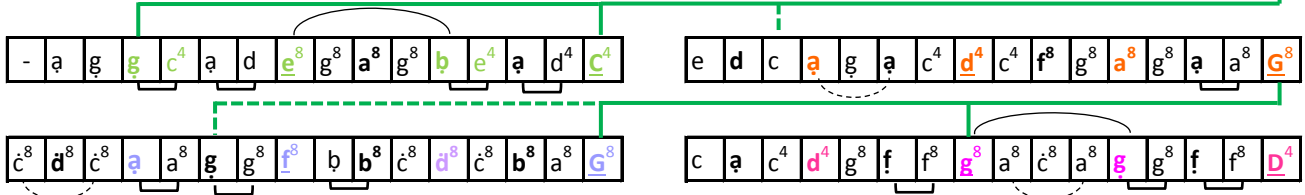

A – 2: Theme II (P 5 – 7)

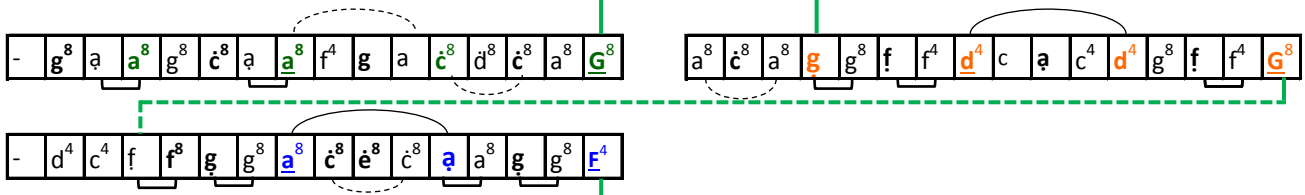

A – 3: Theme III (P 8 – 11)

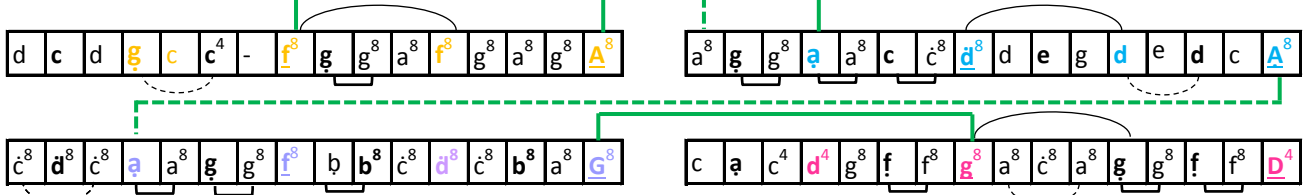

A – 4: Theme I [Repetition] (P 12 – 14)

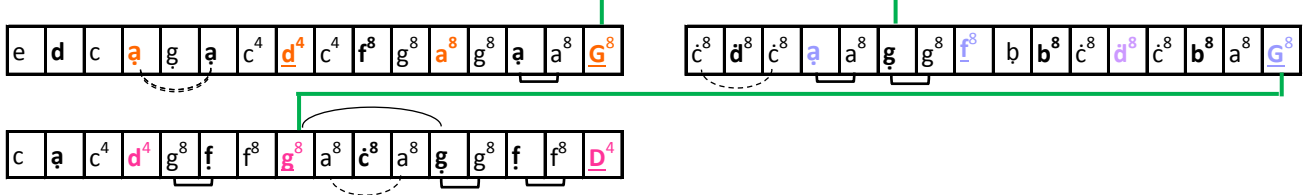

A – 6: Ending of Section A or Introduction of Section B (P 15 – 16)

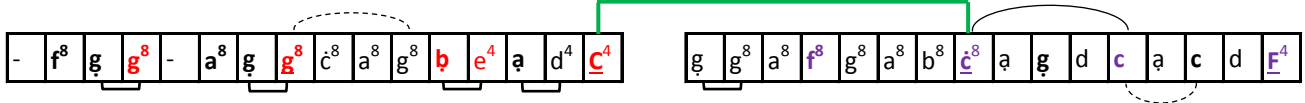

# Bunthieng Sisakda I (LB1) Rhyming Structure: Section B (Phrase 17 – 32)

## B – 1: Transition I (17 – 18)

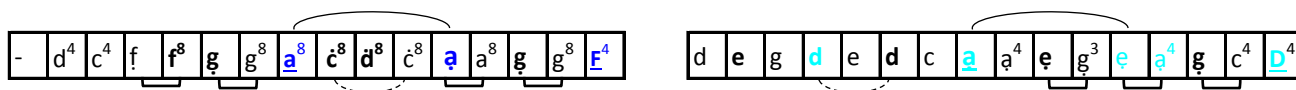

## B – 2: Theme IV (P 19 – 22)

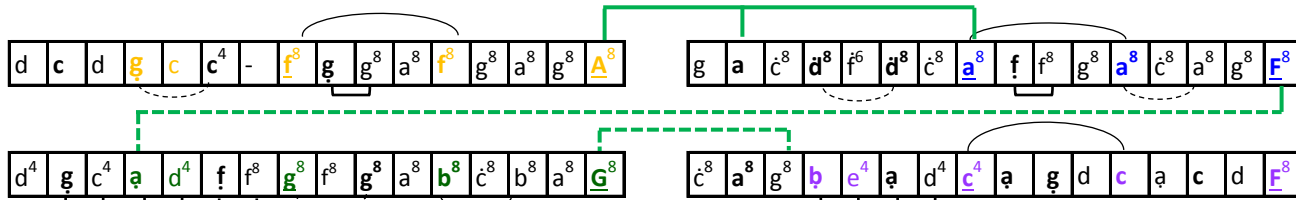

## B – 3: Transition II (P 23 – 24)

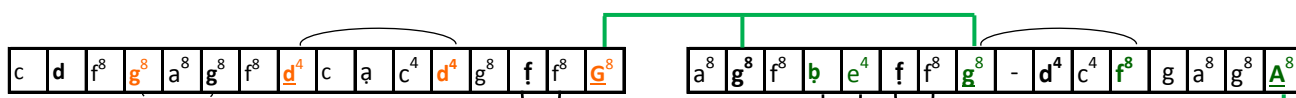

## B – 4: Theme V (P 25 – 28)

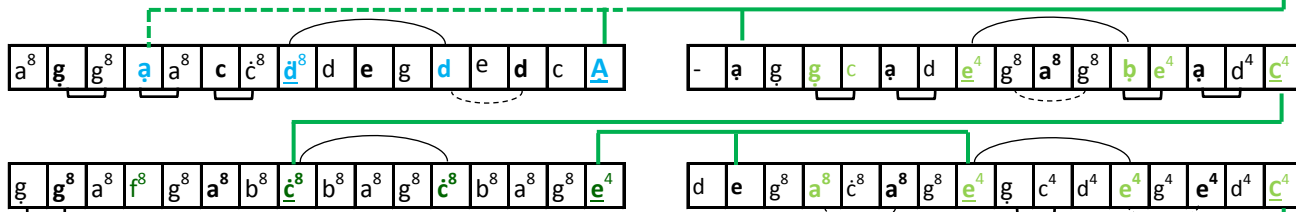

## B – 5: Ending of section B [Final Phrase] (P 29 – 32)

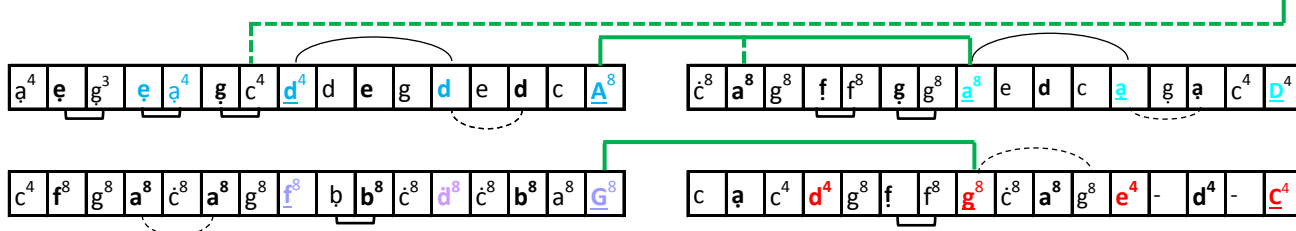

Bunthieng Sisakda II (LB2) : Rhyming Structure: Section A [Phrase (P) 0 – 16]

A – 0: Introduction (P0 )

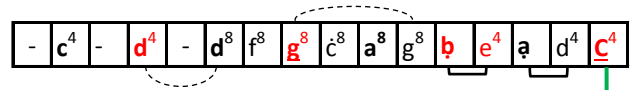

A – 1: Opening phrase (P1) + Theme I (P2 – 4)

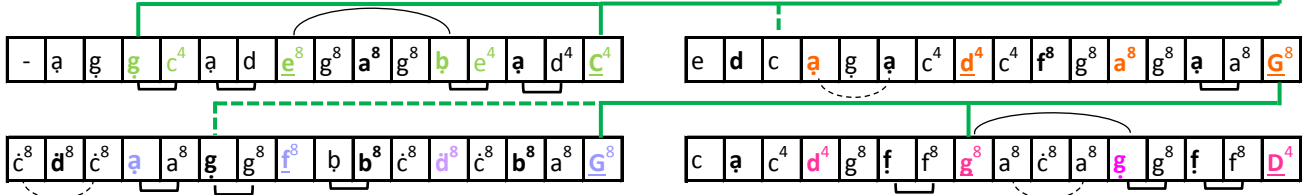

A – 2: Theme II (P 5 – 7)

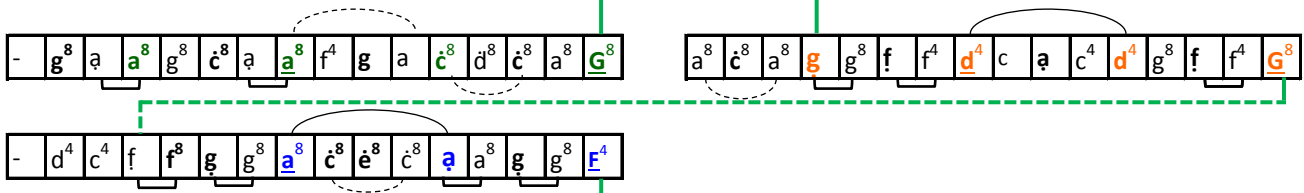

A – 3: Theme III (P 8 – 11)

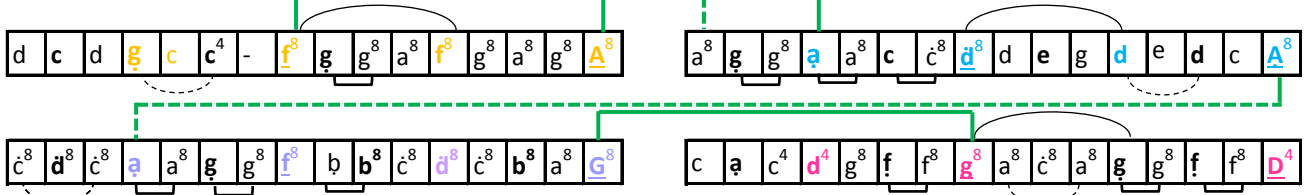

A – 4: Theme I [Repetition] (P 12 – 14)

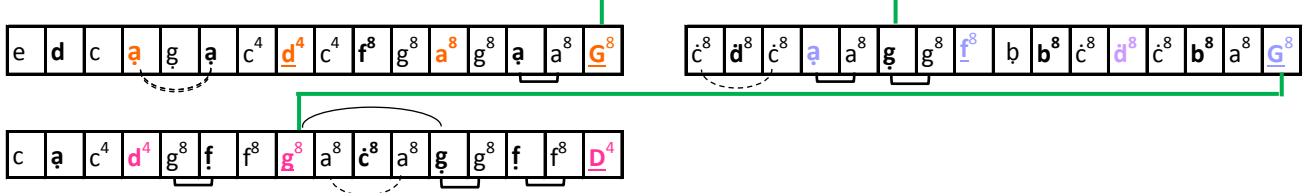

A – 6: Ending of Section A or Introduction of Section B (P 15 – 16)

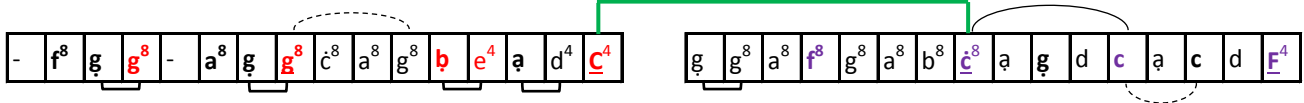

# Bunthieng Sisakda II (LB2): Rhyming Structure: Section B (Phrase 17 – 32)

## B – 1: Transition I (17 – 18)

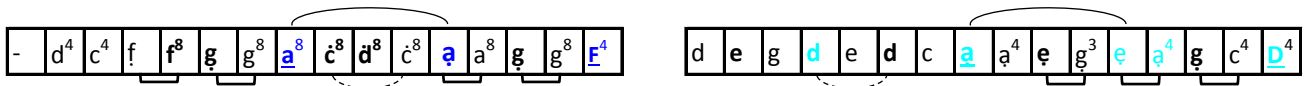

## B – 2: Theme IV (P 19 – 22)

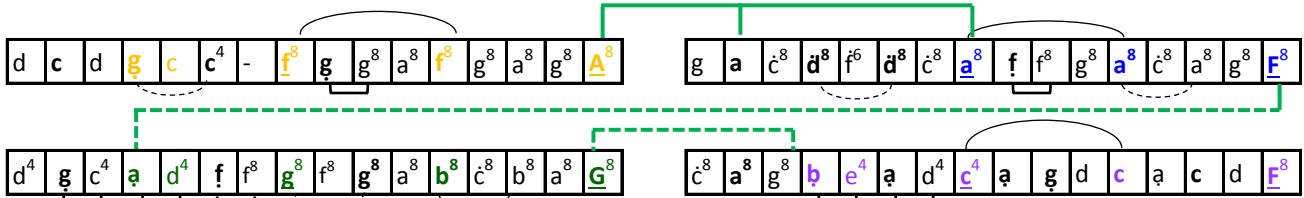

## B – 3: Transition II (P 23 – 24)

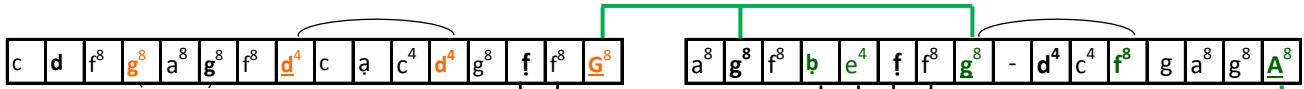

## B – 4: Theme V (P 25 – 28)

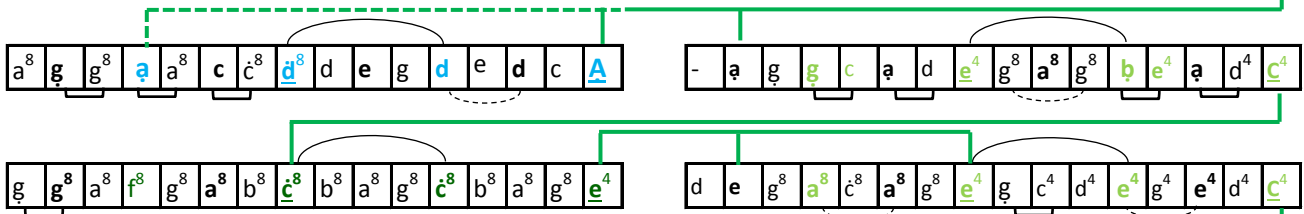

## B – 5: Ending of section B [Final Phrase] (P 29 – 33)

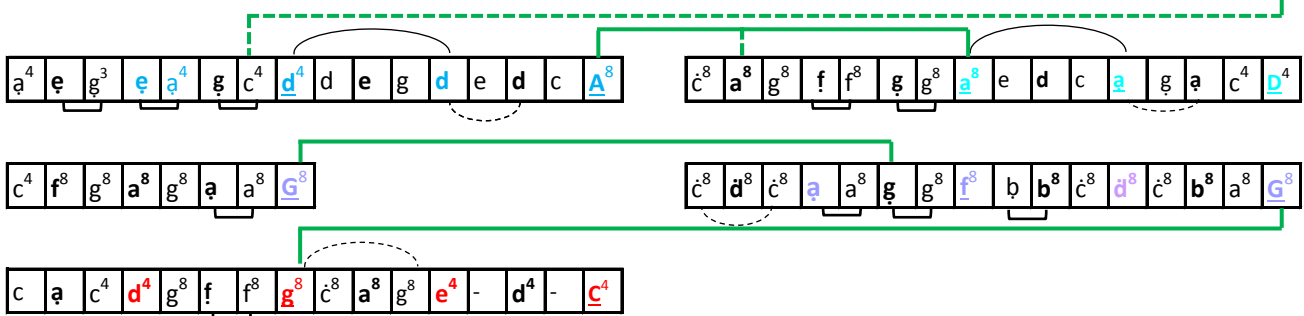

Bunthieng Sisakda III (LB3) : Rhyming Structure: Section A [Phrase (P) 0 – 16]

A – 0: Introduction (P0)

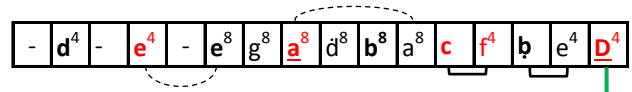

A – 1: Opening phrase (P1) + Theme I (P2 – 4)

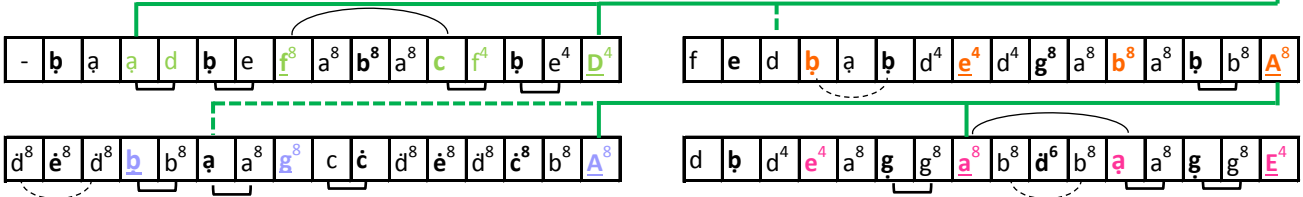

A – 2: Theme II (P 5 – 7)

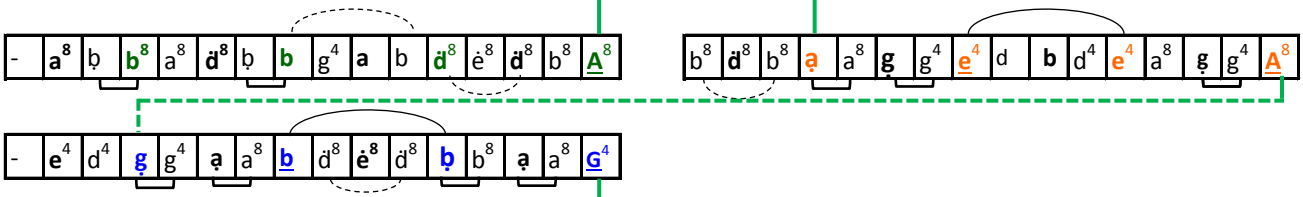

A – 3: Theme III (P 8 – 11)

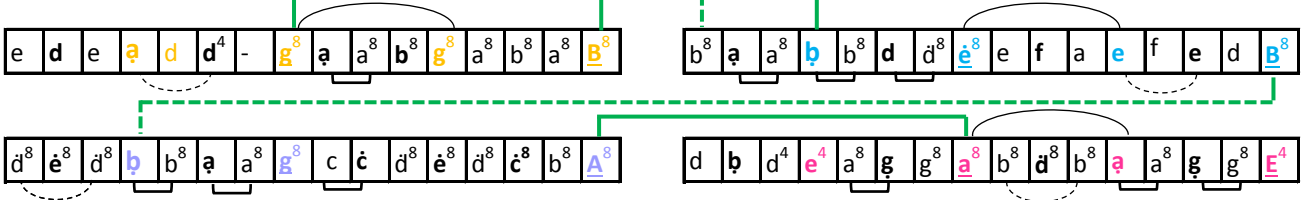

A – 4: Theme I [Repetition] (P 12 – 14)

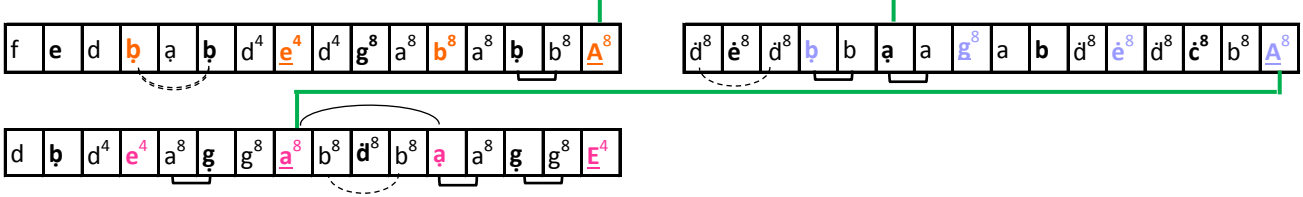

A – 6: Ending of Section A or Introduction of Section B (P 15 – 16)

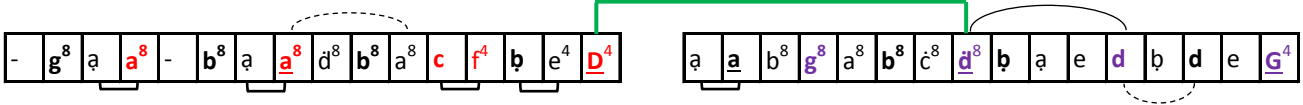

Bunthieng Sisakda III (LB3): Rhyming Structure: Section B (Phrase 17 – 32)

B – 1: Transition I (17 – 18)

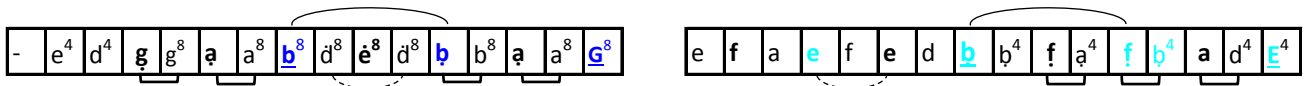

B – 2: Theme IV (P 19 – 22)

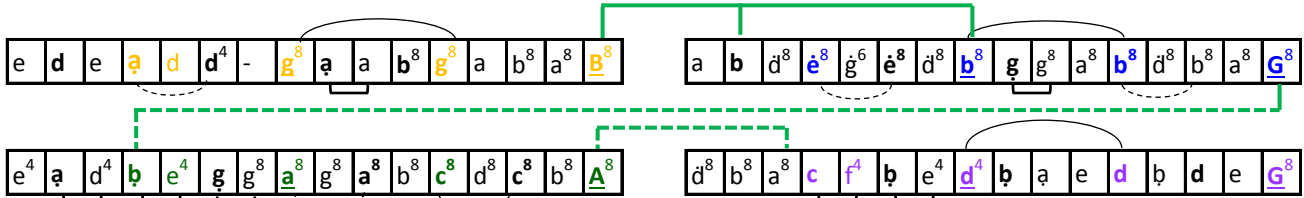

B – 3: Transition II (P 23 – 24)

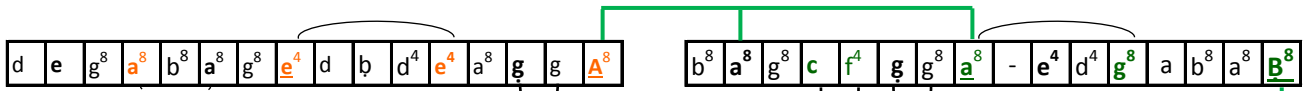

B – 4: Theme V (P 25 – 28)

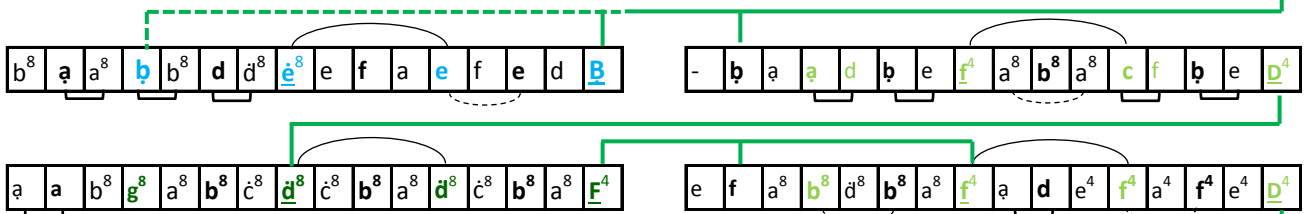

B – 5: Ending of section B [Final Phrase] (P 29 – 32)

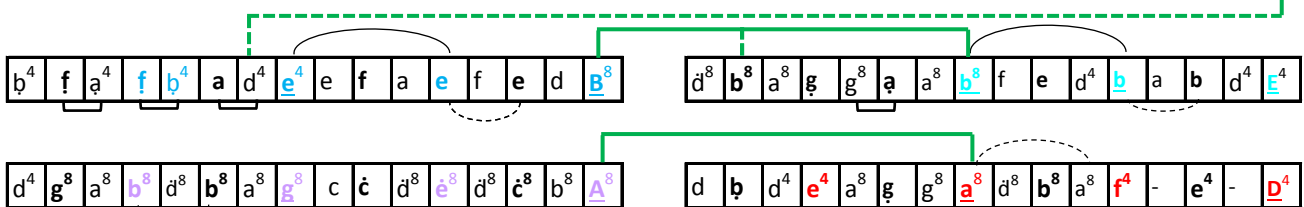

Bunyadet Muensanit III (LY) : Rhyming Structure: Section A [Phrase (P) 0 – 16]

A – 0: Introduction (P0 )

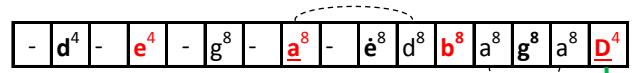

A – 1: Opening phrase (P1) + Theme I (P2 – 4)

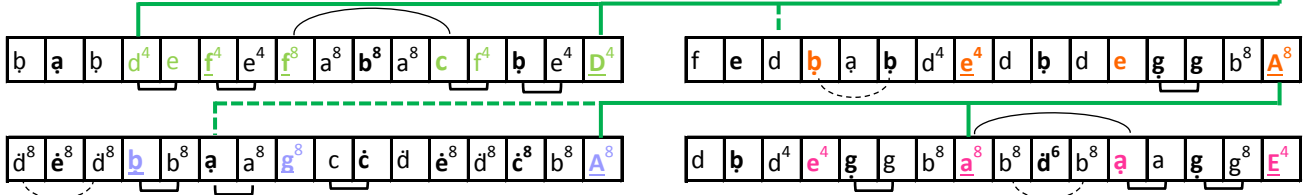

A – 2: Theme II (P 5 – 7)

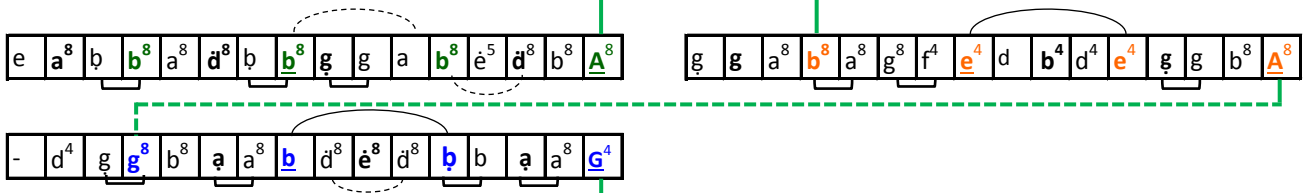

A – 3: Theme III (P 8 – 11)

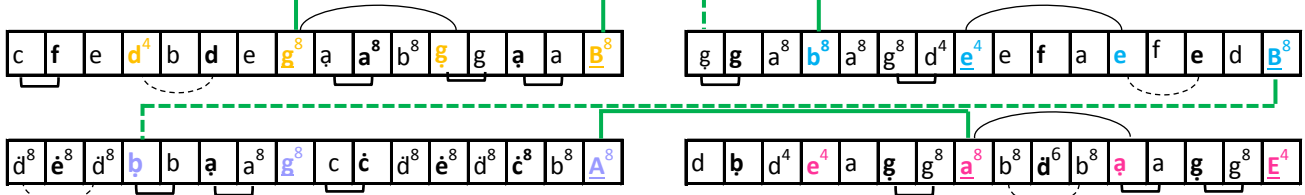

A – 4: Theme I [Repetition] (P 12 – 14)

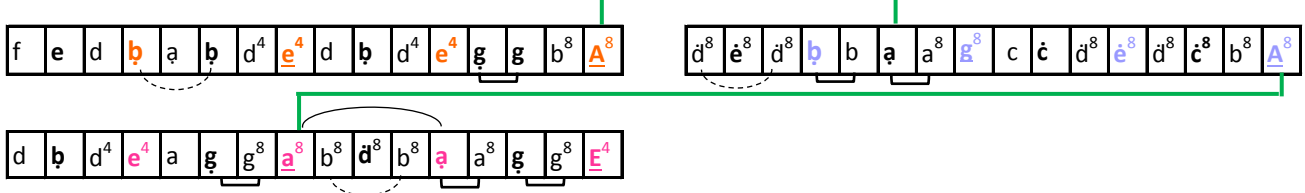

A – 6: Ending of Section A or Introduction of Section B (P 15 – 16)

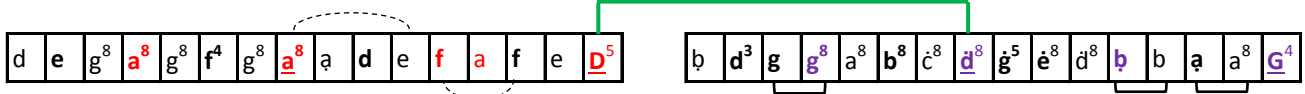

Bunyadet Muensanit III (LY): Rhyming Structure: Section B (Phrase 17 – 32)

B – 1: Transition I (17 – 18)

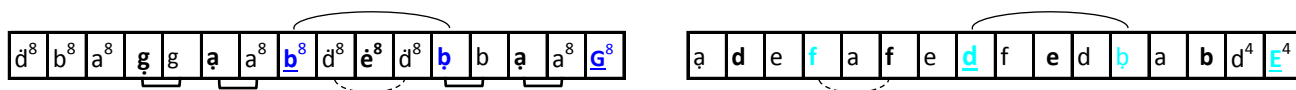

B – 2: Theme IV (P 19 – 22)

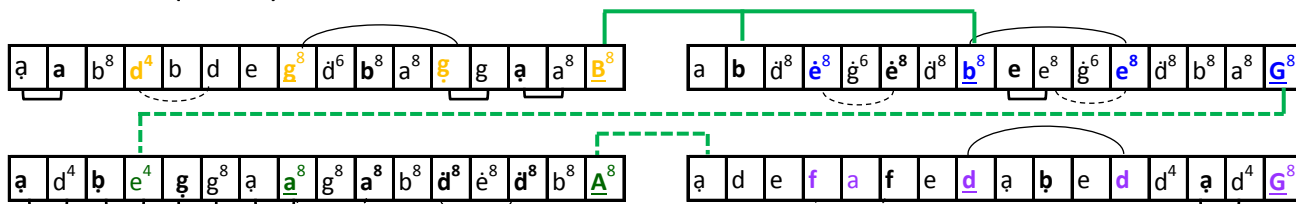

B – 3: Transition II (P 23 – 24)

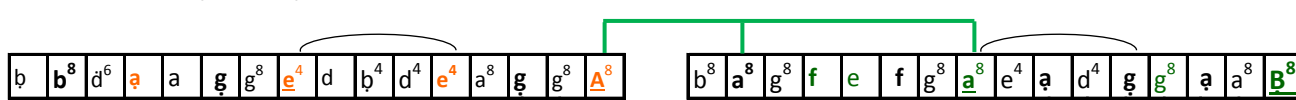

B – 4: Theme V (P 25 – 28)

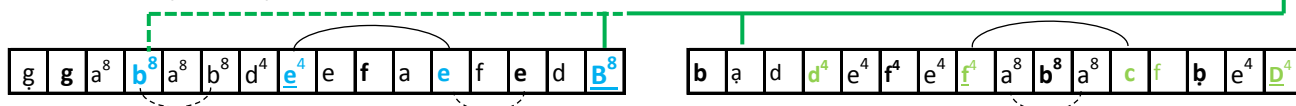

B – 5: Ending of section B [Final Phrase] (P 25 – 27)

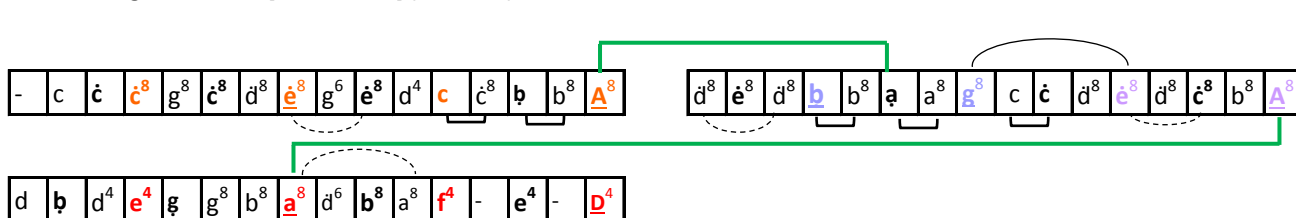

Supplement: s1 [file s1]
