# Supplementary material
Source: MDPI journal article supplement (https://www.mdpi.com/2306-5729/7/11/150)
Supplement: s1 [file s1]

## **Supplementary Materials**

**Title: Manual conversion of Sadhukarn to Thai and Western Music Notations and Their Translation into a Rhyme structure for music analysis.**

**Sumetus Eambangyung <sup>1\*</sup>, Gretel Schwörer – Kohl <sup>1</sup> and Witoon Purahong <sup>2</sup>**

<sup>1</sup> Institut für Musik, Medien- und Sprechwissenschaften (IMMS) Abteilung  
Musikwissenschaft, Martin – Luther – Universität Halle – Wittenberg, 06099 Halle (Saale),  
Germany

<sup>2</sup> Department of Soil Ecology, UFZ-Helmholtz Centre for Environmental Research, D-06120  
Halle (Saale), Germany

\* Author to whom correspondence should be addressed.

**Supplementary File S1:** Western music notation of Sadhukarn main melody collected in Thailand, Cambodia, and Laos.

# Sadhukarn

for large gongs circle

Thai Fine Arts Department (TF)

## Introduction

Taphon

LGC

7 L R R L R R L R R L R R R R

11 R L L R L R R

15 R L R

19

23

27 R R L L

31 R R L L R

35 L R

The musical score for 'Sadhukarn' for large gongs circle is presented in a single system. The Taphon part is written in a single line of music, and the LGC part is written in a single line of music. The score is divided into measures, with some measures containing multiple notes. The notes are color-coded: red, green, blue, orange, and pink. The score includes a key signature of one sharp (F#) and a time signature of 2/4. The title is 'Sadhukarn' for large gongs circle, by Thai Fine Arts Department (TF). The section is labeled 'Introduction'.

39 L R R R L R L L

43

47 R R

51 R L L R L R R

55 R L R L R

59 R L R R

63 R R L L L

67 R L R R R R L L R L L R R

71 L R R R

75 L R R L L R L L R L R **To Coda**

78 R L L R L R R L R R

83

87 L R L R

91 R R L L R R L L R L L R R L L R R L R R

95 L R

99 R L L R R R L

103 L R R R L R L L L R L L R

107 L R L R R

111 R L L R L L L R L R R L R R

115

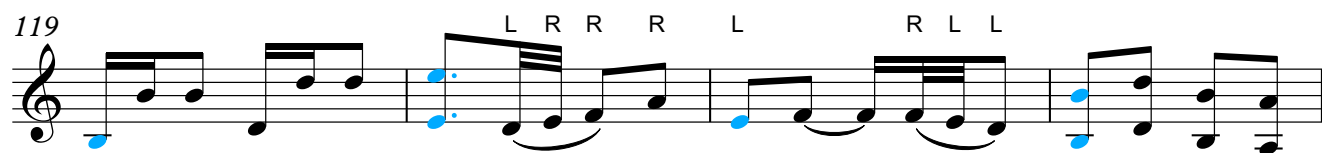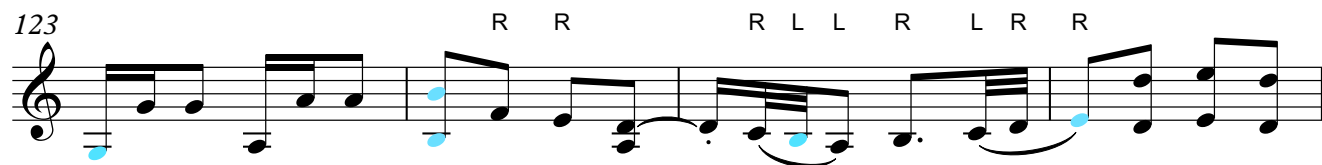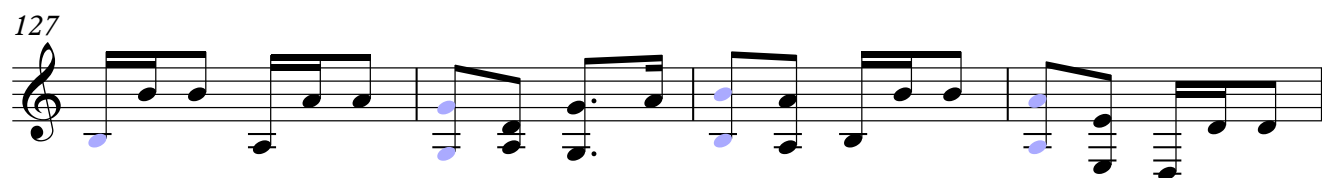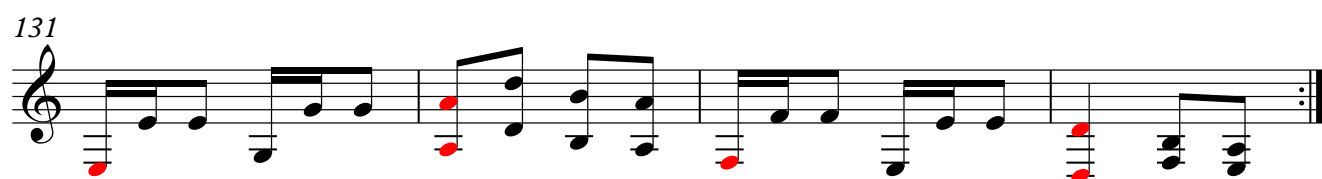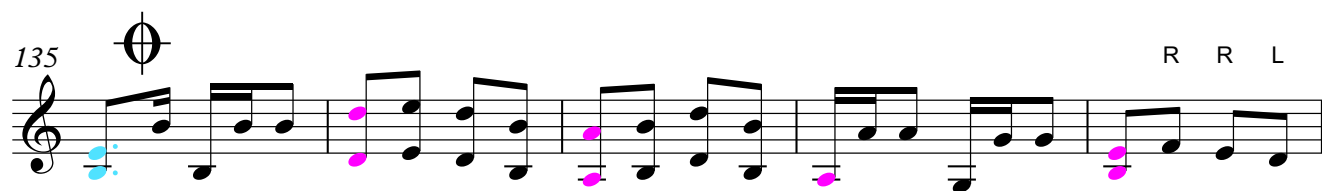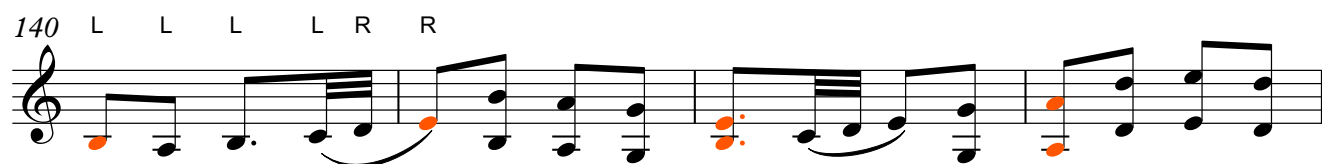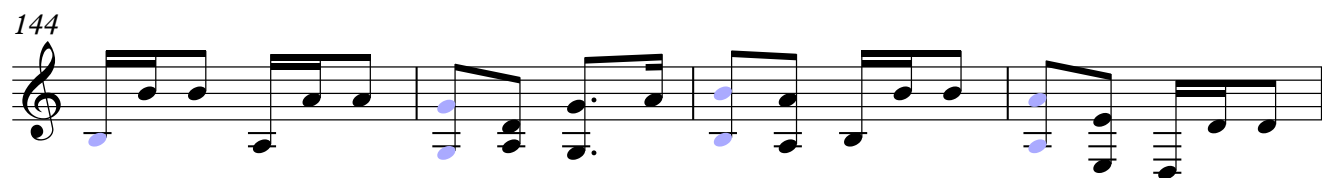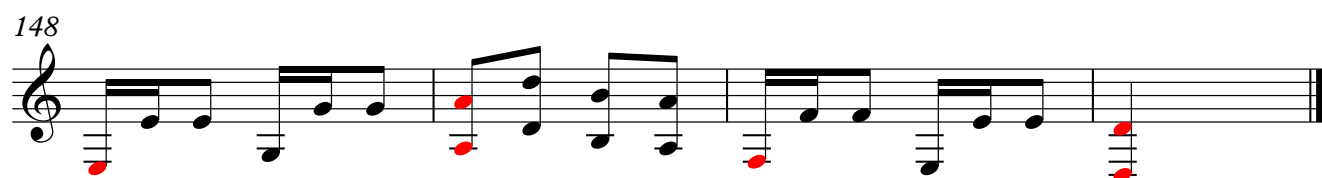

# Sadhukarn

for large gongs circle

Laung Bamroong Chit Charoen (TB)

## Introduction

Taphon

7

11

15

19

23

27

31

35

L R R L R R

R R

R L L R L R R

L R R

L R

R L L R

L R R

L L L R R

R R

R L L R

L R

39 L R R R L R L L

43 L R R L R

47 R R

51 R L L R L R R

55 L R R L R

59

63

67 R R

71 R L R R R

75 L R L L L To Coda

78 L L R R L R R 3

83

87 L R L R

91 R R R L L R L L R L L R R L R R

95

99 L R R R L L R R R L

103 L R R R L R L L L R L L R L

107 L L R L R R

111 R L L R L L L R L R R L R R

115



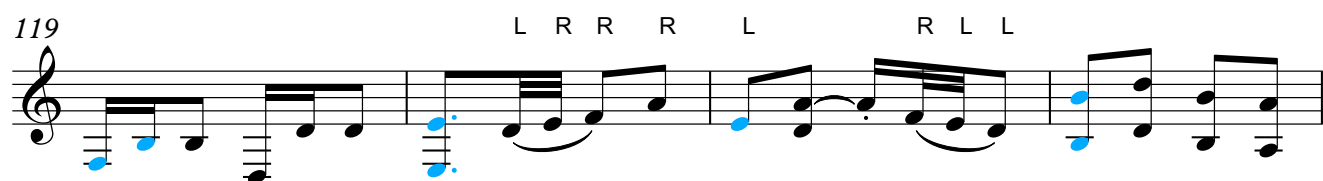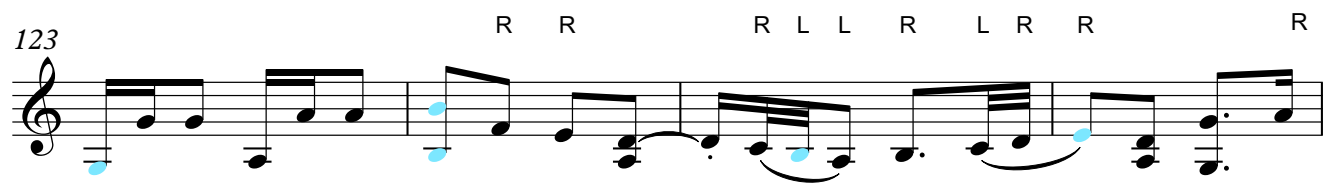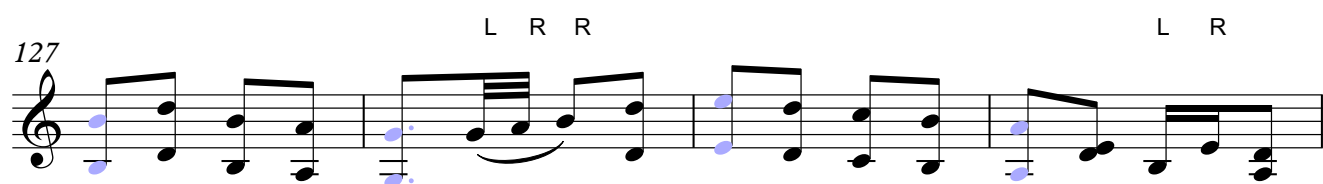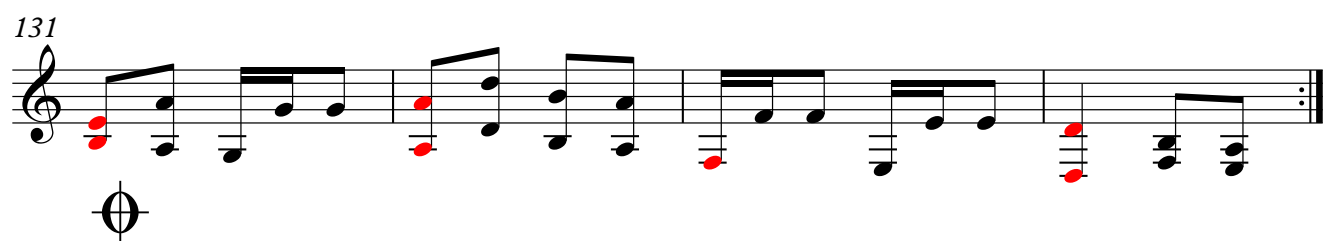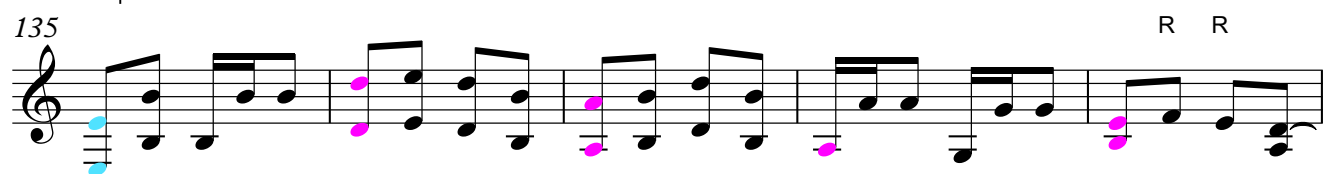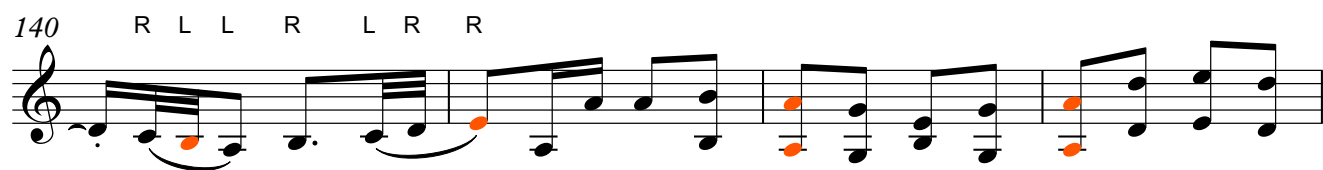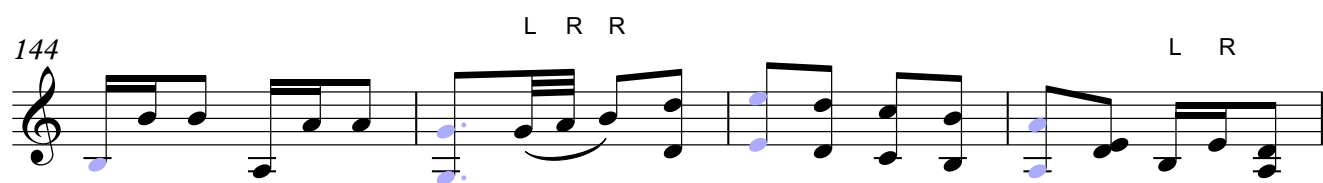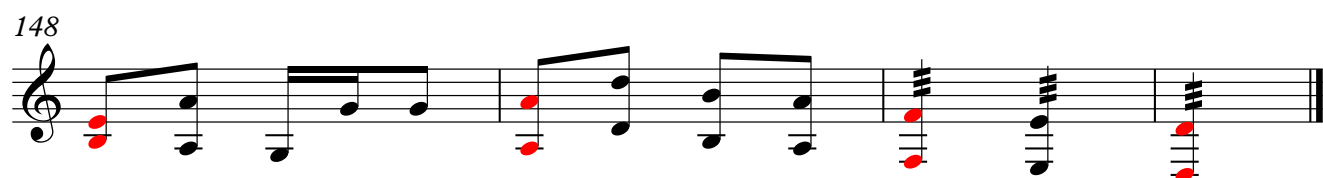

# Sadhukarn

for large gongs circle

Samran Kerdphol (TS1)

## Introduction

Taphon

7

11

15

19

23

27

31

35

L R R L R R

R R L

L L L

L R R

L R L R R

L R R R

L R

39

43

47 R L L R R L

51 L L L

55

59 R

63 R L R L R

67 R L L R L L R L L R R

71 L R R R

75 L R L L L To Coda

The musical score is written on ten staves. The first staff (39) has blue dots on the first and fourth measures. The second staff (43) has purple dots on the first, third, and fifth measures. The third staff (47) has pink dots on the first, third, and fifth measures, with a blue dot on the sixth measure. The fourth staff (51) has orange dots on the first, third, and fifth measures. The fifth staff (55) has purple dots on the first, third, and fifth measures. The sixth staff (59) has pink dots on the first, third, and fifth measures. The seventh staff (63) has red dots on the first, third, and fifth measures. The eighth staff (67) has purple dots on the first, third, and fifth measures. The ninth staff (71) has blue dots on the first, third, and fifth measures. The tenth staff (75) has blue dots on the first, third, and fifth measures. The letters R and L are placed above the staves to indicate right and left hand movements. The piece ends with a 'To Coda' instruction.

78 R L L R L R L R R 3

83 R

87 R L R L R

91 R R R L L L L R L L L R R

95

99 R R L L L R

103

107

111 L R R

115 R R R

119 L L L L R R R L R L L L

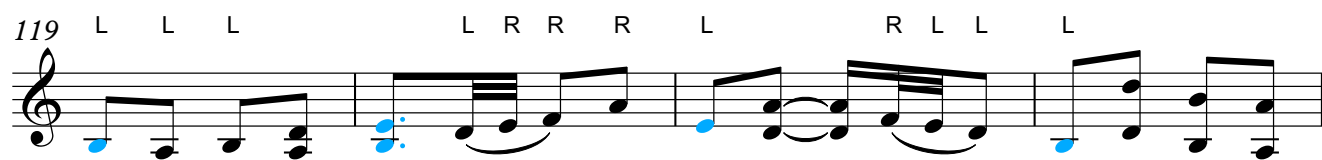

123 R R L L L L

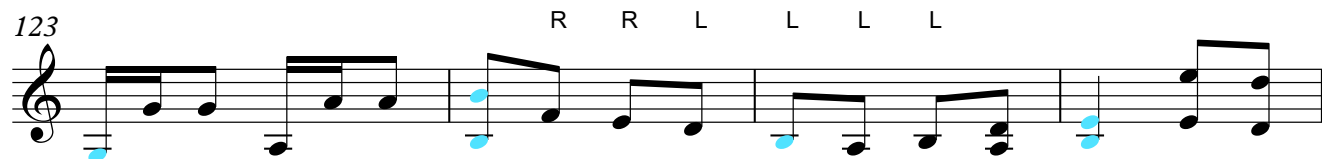

127



131 L R R

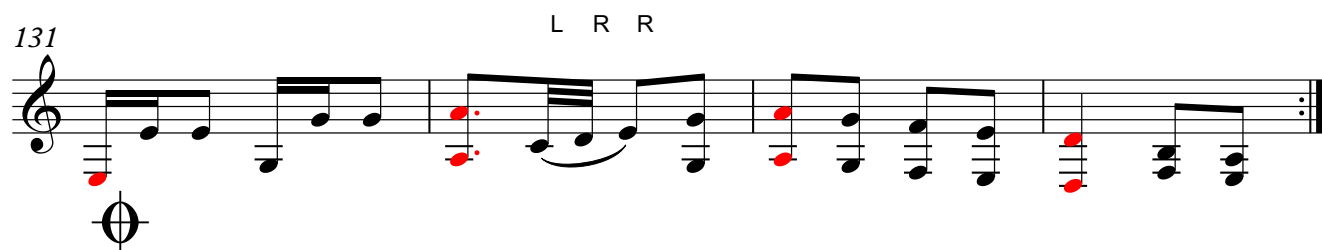

135 R L L R R L

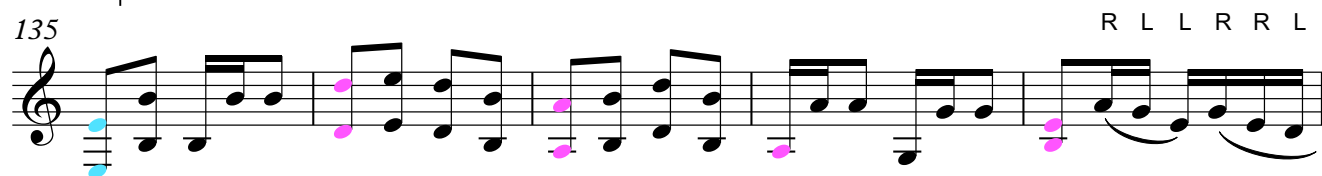

140 L L L

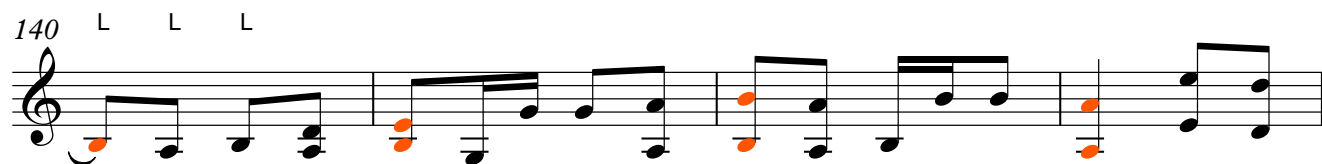

144



148 L R R



# Sadhukarn

for large gongs circle

Phinij Chaisuwan I  
(TP1)

## Introduction

Taphon

7

11

15

19

23

27

31

35

L R

R R

R L L R L R R

L R R L R L R

R

L R R

L R

L R R R

L R

R

39 L R R R L R L L

43 L R R L R L R

47 R R R

51 R L L R L R R

55 L R R L R L R

59 R L R

63

67 L L R L L R R

71 L R R R

75 L R L L L To Coda

78 R L L R L R L R R 3

83 L R

87 L R R L R L R

91 R R R L L L L R L L L R R L R R

95

99 L R R R L L R R R L

103 L R R R L R L L L R L R L

107 L L R L R R

111

115



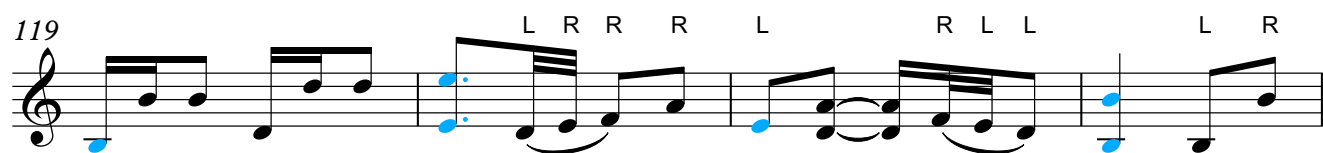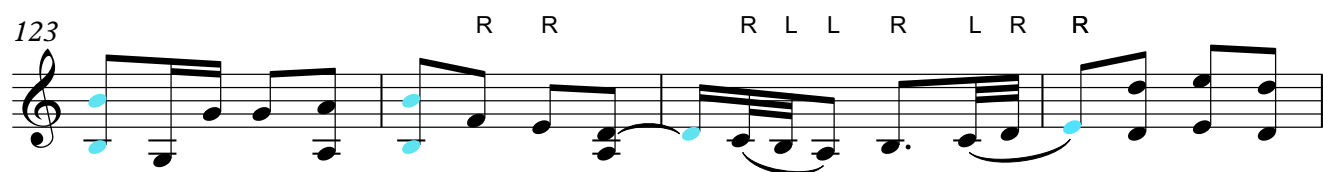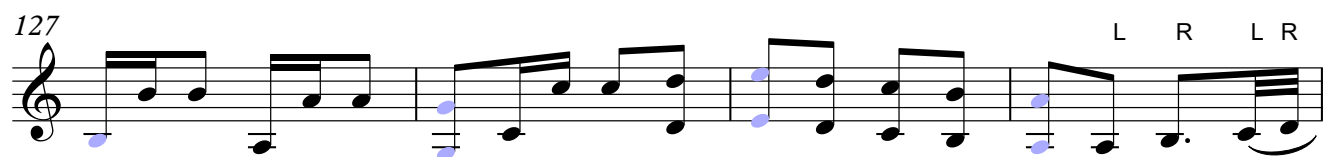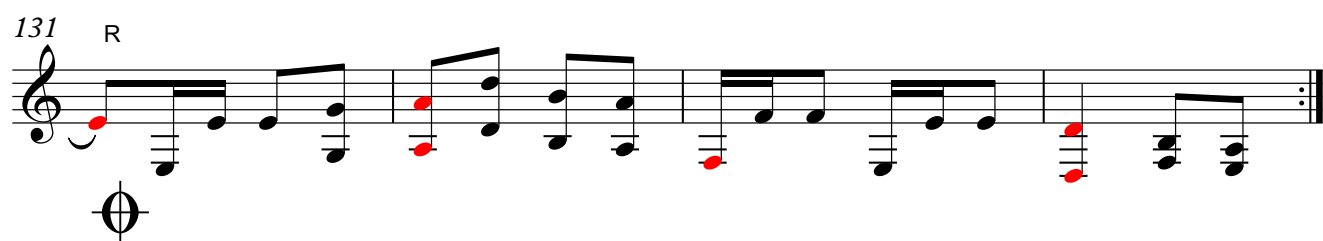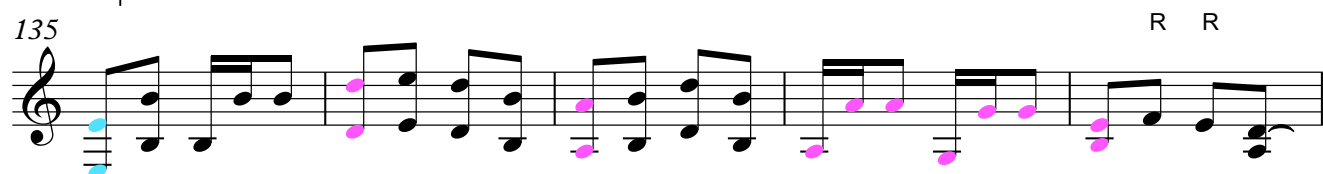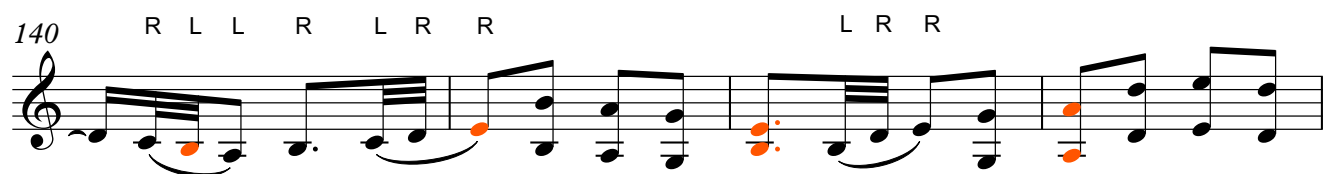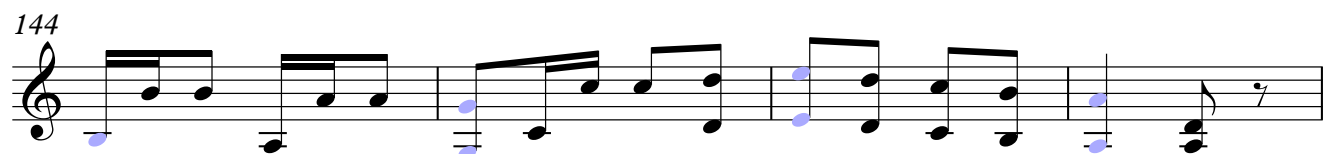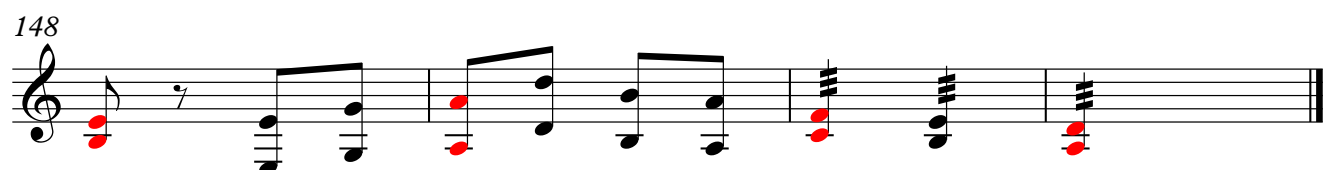

# Sadhukarn

for large gongs circle

Thai music ensemble of Bangkok  
(TK)

## Introduction

Taphon

7

11

15

19

23

27

31

35

L R

R R L

L L L

L R R

L R

L R R

L R

L R R

L R

L R

R

39

43 L R R L R

47 L R R R R L

51 L L L L R R

55 L R R L R

59 L R R L R

63 L R L R R R L L R R L L

67 L L R L L R R

71 L R R R

75 L R R L L

To Coda

78 R L L R L R L R R 3

83 L R

87 L R R L R L R

91 R R L L R R L L R L L R L L R R L R R

95

99 R L L R R R L

103 L R R R L R L L L R L L R L

107 L L R L R R

111 R L L R L L L R L R R L R R

115

119 L R R R L R L L L R



123 R R L L L L



127 L R R L R



131

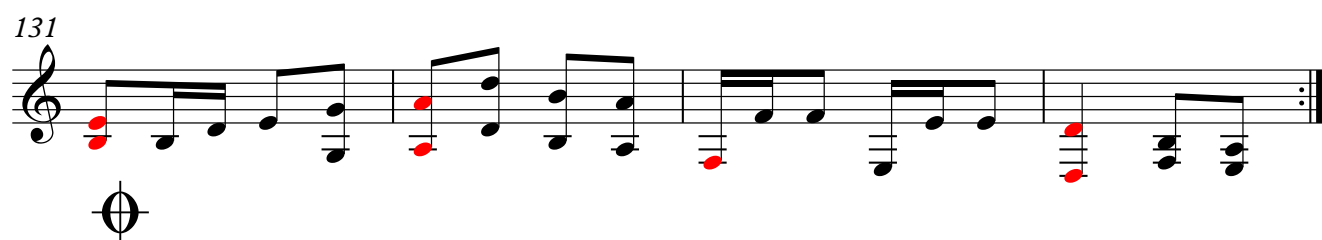

⊙

135 R R L



140 L L L L R R



144 L R R



148



# Sadhukarn

for large gongs circle

Chub Sowat (TC)

## Introduction

Taphon

7

11

15

19

23

27

31

35

L R R L R R

R R

R L L R L R R

L R R

L L R

R

R

L R R

L L L R R

R R

R L L R

L R

39 L R R R L R L L

43 L R R L L R

47 R R R

51 R L L R L R R

55 L R R L L R

59 R

63 R L L

67 L L R R L L R R R L L R L L R R R

71 R L R R R

75 L R L L L

The musical score is written on a single staff with a treble clef. It consists of nine measures, each containing a sequence of notes and rests. The notes are color-coded: blue, purple, pink, orange, red, and light blue. Above each staff is a sequence of letters (L, R) indicating the fingering for the notes. The piece ends with a double bar line and a repeat sign.

79 L L R R L R R 3

83

87 L R R

91 R L L R L L R R L R R

95

99 R L L R L R R R L L R L L R

103 L R R R L R L L L R L L R

107 L R L R R

111 R L L R L L L R L R R L R R

115



123

127

131

135

140

144

148

148 R

The musical notation for measure 148, right hand, is as follows: The staff begins with a treble clef. The first beat contains a quarter note G4 (marked red) and a quarter rest. The second beat contains a quarter note A4 and a quarter note B4. The third beat contains a quarter note C5 (marked red) and a quarter note D5. The fourth beat contains a quarter note E5 (marked red) and a quarter note F5. The fifth beat contains a quarter note G5 (marked red) and a quarter note A5. The sixth beat contains a quarter note B5 (marked red) and a quarter note C6. The seventh beat contains a quarter note D6 (marked red) and a quarter note E6. The eighth beat contains a quarter note F6 (marked red) and a quarter note G6. The measure ends with a double bar line.

# Sadhukarn

for large gongs circle

Chue Dontrirot  
(TD)

## Introduction

Taphon

7

11

15

19

23

27

31

35

L R

R R L

L L L

L R R

L R

L R R

L R

L R R R

L R

39

43 L R R L R

47 L R R R R L

51 L L L

55 L R R L L L R

59 R L R

63 R R R L

67 L L L R R L L R R R L L L L L R R

71 L R R R

75 L R L L L To Coda

The musical score is written on ten staves. The first staff (39) has blue dots above the first, fourth, and eighth notes. The second staff (43) has purple dots above the first, fourth, and eighth notes, and 'L R R' above the second, third, and fourth notes. The third staff (47) has pink dots above the first, fourth, and eighth notes, and 'L R R' above the first three notes, and 'R R L' above the last three notes. The fourth staff (51) has orange dots above the first, fourth, and eighth notes, and 'L L L' above the first three notes. The fifth staff (55) has purple dots above the first, fourth, and eighth notes, and 'L R R' above the second, third, and fourth notes, and 'L L L R' above the last four notes. The sixth staff (59) has pink dots above the first, fourth, and eighth notes, and 'R L R' above the first three notes. The seventh staff (63) has red dots above the first, fourth, and eighth notes, and 'R R R L' above the last four notes. The eighth staff (67) has purple dots above the first, fourth, and eighth notes, and 'L L L R R L L R R R L L L L L R R' above the notes. The ninth staff (71) has blue dots above the first, fourth, and eighth notes, and 'L R R R' above the last four notes. The tenth staff (75) has blue dots above the first, fourth, and eighth notes, and 'L R L L L' above the first five notes, followed by 'To Coda'.

78 L R R R L R L R R 3

83

87 R L R L R

91 R R R L L R L L L L L R R L R

95 R

99 L R R R L L R R R L

103 L R R R L R L L L R L L R L

107 L L R L R R

111 R L R R

115

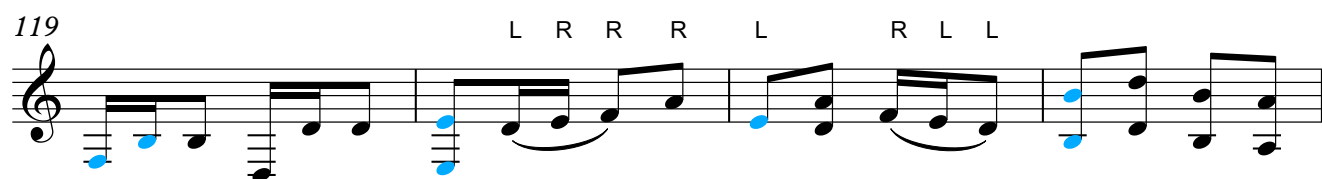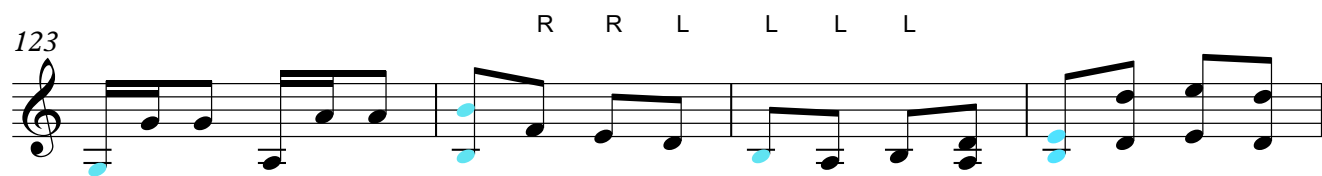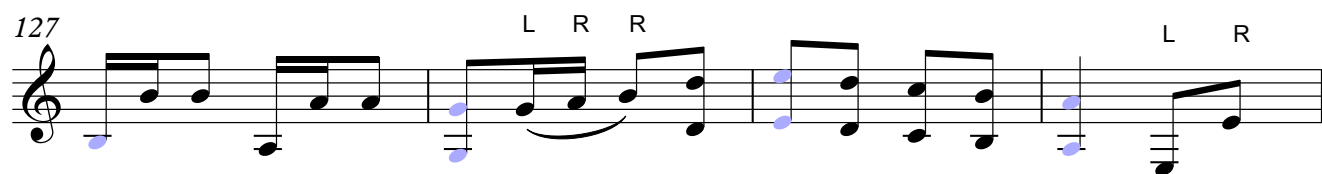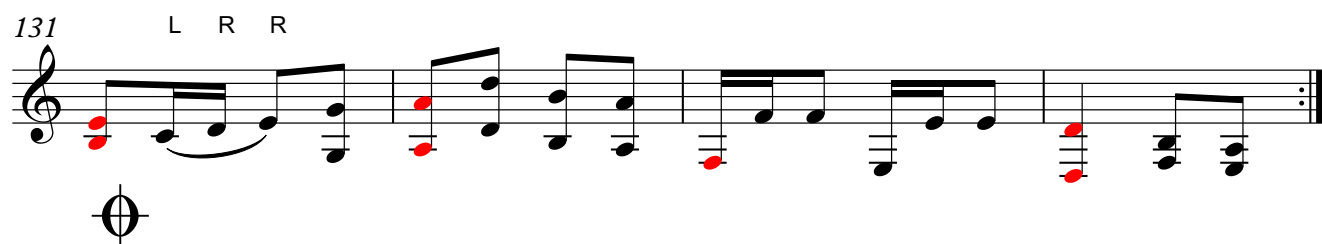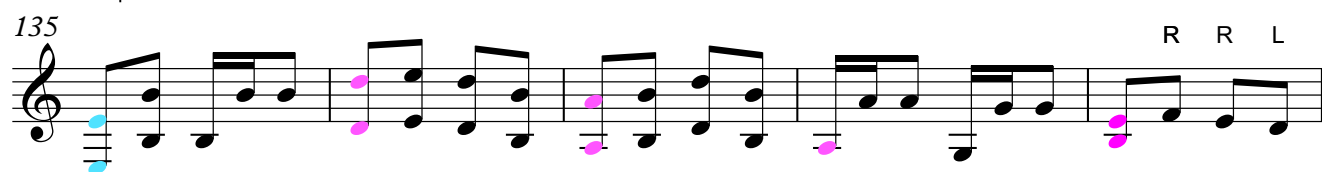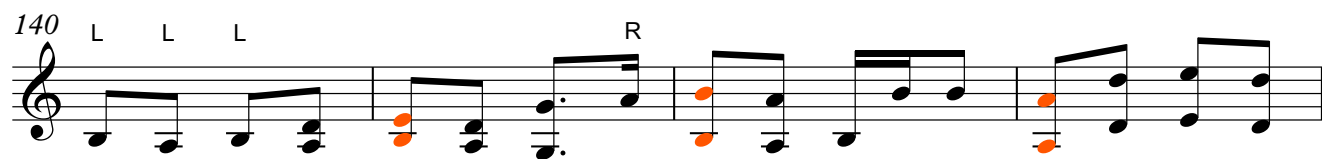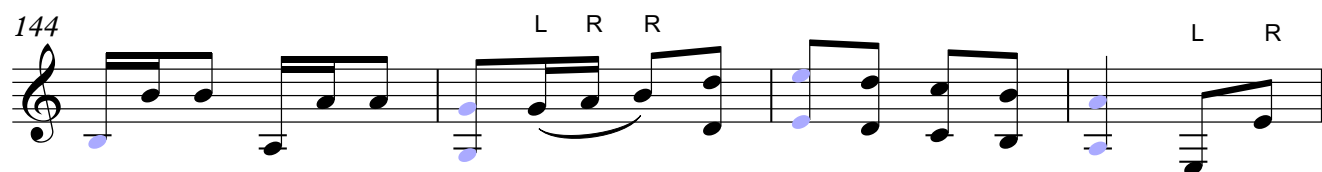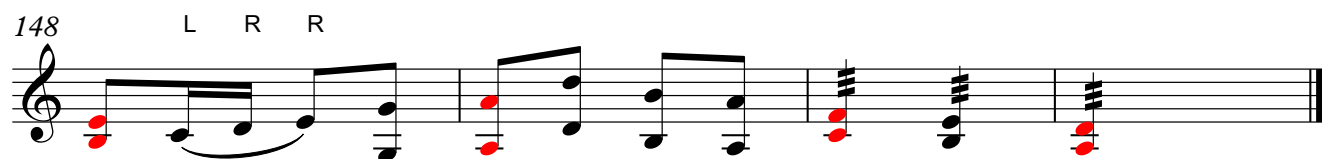

# Sadhukarn

for large gongs circle

Tuen Phatayakul (TP)

## Introduction

Taphon

7

11 L L L L R R

15 L R R

19

23 L R R L R R

27

31 L R R R

35 L R

39 L R R R L R L L

43 L R R

47 R R L

51 R L L R L R R L R R

55 L R R

59

63

67

71 L R R R

75 L R L L L To Coda

The musical score is written on ten staves, each beginning with a measure number. The notes are color-coded to match the letters above them: blue for 'L', purple for 'R', pink for 'L', orange for 'R', and red for 'L'. The letters are placed above the staves in groups corresponding to the measures. The piece concludes with a 'To Coda' instruction.

78 L L R R L R R

83

87 L R L R

91 R R R L L R L L L L L R R L R R

95

99 R L L R R L

103

107

111 R L L L R R L R R

115

Detailed description of the musical score: The score consists of ten staves of music. Each staff begins with a measure number. Above the staves, there are groups of letters 'L' and 'R' that correspond to specific notes in the music. The notes are often beamed together in groups of four or six, suggesting a fast tempo. The colored dots are placed above the notes, possibly indicating fingerings or articulation. The letters 'L' and 'R' are placed above the notes, possibly indicating left and right hand positions or fingerings. The page number '3' is in the top right corner.



127

L R R

131

Exercise 131 is a single-line musical piece in treble clef. It consists of a sequence of eighth and sixteenth notes, some of which are marked with red dots. The notation is as follows:   
Measure 1: Quarter rest, eighth note G4 (red dot), eighth note A4, eighth note B4, eighth note C5.   
Measure 2: Quarter rest, eighth note D5, eighth note E5, eighth note F5, eighth note G5.   
Measure 3: Quarter rest, eighth note A5, eighth note B5, eighth note C6, eighth note D6.   
Measure 4: Quarter rest, eighth note E6, eighth note F6, eighth note G6, eighth note A6.   
Measure 5: Quarter rest, eighth note B6, eighth note C7, eighth note D7, eighth note E7.   
Measure 6: Quarter rest, eighth note F7, eighth note G7, eighth note A7, eighth note B7.   
Measure 7: Quarter rest, eighth note C8, eighth note D8, eighth note E8, eighth note F8.   
Measure 8: Quarter rest, eighth note G8, eighth note A8, eighth note B8, eighth note C9.   
The piece ends with a double bar line and repeat dots.

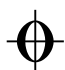

135

Musical notation for measure 135. The staff features a treble clef and a key signature of one flat (B-flat). The melody consists of eighth notes, some of which are accented. There are two rests labeled 'R' at the end of the measure.

140 R L L R L R R L R R



The musical notation for exercise 140 is written on a single staff with a treble clef. It consists of two measures. The first measure contains a sequence of eighth notes: G4 (black), F#4 (orange), E4 (black), D4 (black), C4 (black), B3 (black), A3 (black), and G3 (black). The second measure contains a sequence of eighth notes: F#4 (orange), E4 (black), D4 (black), C4 (black), B3 (black), A3 (black), G3 (black), and F#3 (black). Slurs are placed over the first four notes of each measure. The notes are connected by a continuous line, indicating a rapid sequence of notes.

144

L R R

148

Musical notation for measure 148, featuring a treble clef and a series of notes and rests.

# Sadhukarn

for large gongs circle

Thawin Attakisna (TT)

## Introduction

Taphon

7

11

15

19

23

27

31

35

39 L R R R L R L L

43 L R

47 L R R R R

51 L L L L R R

55 L R

59 L R R

63 R L L

67 L R R R L R L L R L L R R

71 L R R R

75 L R L L L To Coda

The musical score is written in treble clef with a key signature of one flat (B-flat). The notes are color-coded: blue, purple, pink, orange, and red. The letters 'L' and 'R' above the staves indicate left and right hand positions. The piece ends with a double bar line and the text 'To Coda'.

78 L L R R L R R

83

87 L R R

91 L L R L L R R L R

95 R L R

99 L R R

103 L R R R L R L L L R L L R R L

107 L L R L R R

111 L R R

115 R R

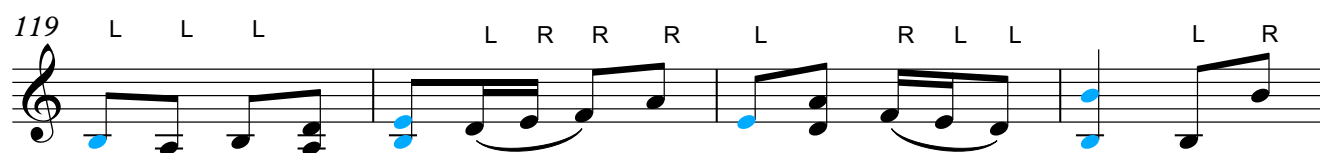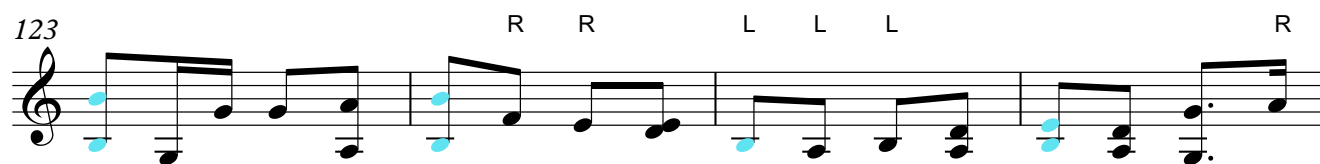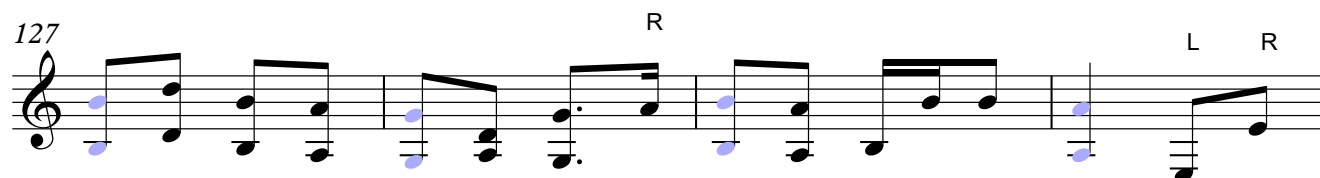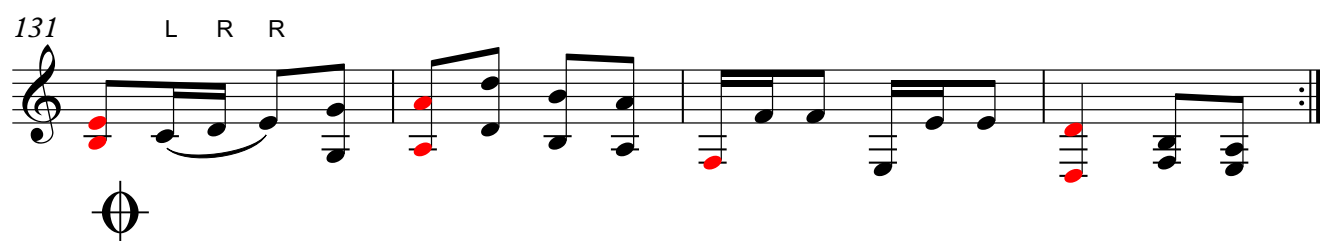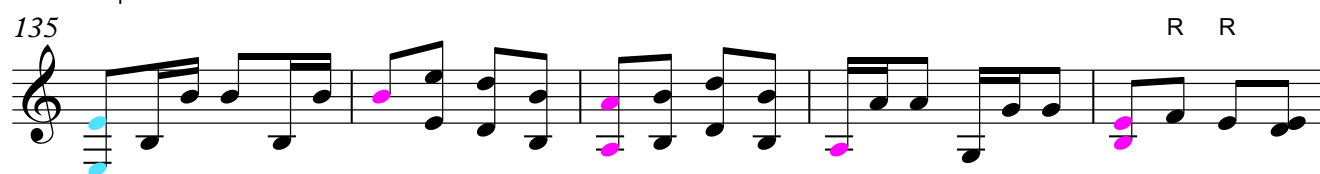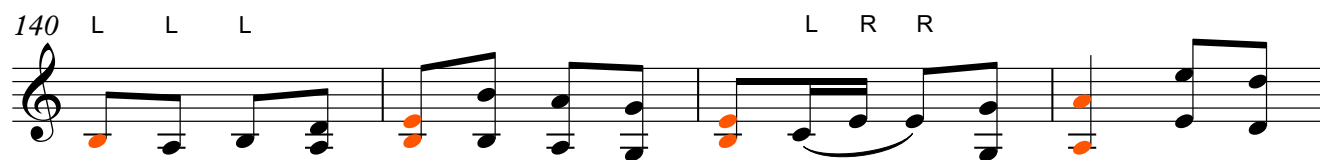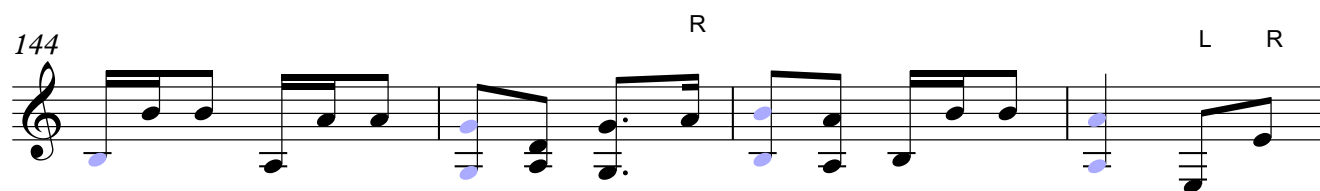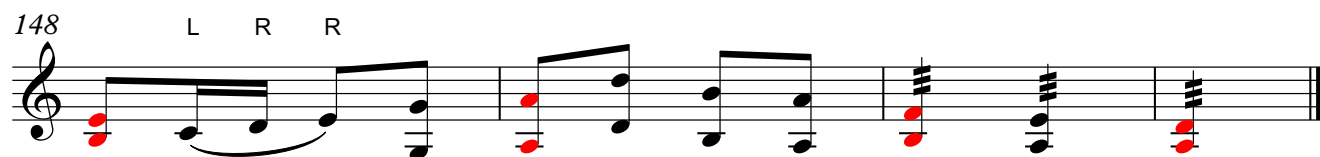

# Sadhukarn

for large gongs circle

Pinij Chaisuwan II  
(TP2)

## Introduction

Taphon

7 R R R L

11 L L L L R R

15 L R R L R

19 L R R

23 L R R

27 L R

31 L R R R

35 L R R

39

43 L R R L R

47 L R R R R L

51 L L L L R R

55 L R R L R

59 L R R L R

63 L R L R R R L L R R L L

67 L L R L L R R

71 L R R R

75 L R R L L To Coda

The musical score is written on ten staves, each containing five measures. The notes are primarily eighth and sixteenth notes, often beamed together. The key signature is one flat (B-flat). The score includes various musical notations such as slurs, ties, and dynamic markings. The colored dots are placed under the following notes: Staff 39: blue under the first note of the first measure. Staff 43: purple under the first note of the first measure, blue under the first note of the second measure, blue under the first note of the third measure, blue under the first note of the fourth measure, blue under the first note of the fifth measure. Staff 47: pink under the first note of the first measure, pink under the first note of the second measure, pink under the first note of the third measure, pink under the first note of the fourth measure, pink under the first note of the fifth measure. Staff 51: orange under the first note of the first measure, orange under the first note of the second measure, orange under the first note of the third measure, orange under the first note of the fourth measure, orange under the first note of the fifth measure. Staff 55: blue under the first note of the first measure, blue under the first note of the second measure, blue under the first note of the third measure, blue under the first note of the fourth measure, blue under the first note of the fifth measure. Staff 59: pink under the first note of the first measure, pink under the first note of the second measure, pink under the first note of the third measure, pink under the first note of the fourth measure, pink under the first note of the fifth measure. Staff 63: red under the first note of the first measure, red under the first note of the second measure, red under the first note of the third measure, red under the first note of the fourth measure, red under the first note of the fifth measure. Staff 67: purple under the first note of the first measure, purple under the first note of the second measure, purple under the first note of the third measure, purple under the first note of the fourth measure, purple under the first note of the fifth measure. Staff 71: blue under the first note of the first measure, blue under the first note of the second measure, blue under the first note of the third measure, blue under the first note of the fourth measure, blue under the first note of the fifth measure. Staff 75: blue under the first note of the first measure, blue under the first note of the second measure, blue under the first note of the third measure, blue under the first note of the fourth measure, blue under the first note of the fifth measure.

78 R L L R L R 3

83 L R

87 L R R L R L R

91 R R L L R R L L R L L R L L R R L R R

95

99 R L L R R R L

103 L R R R L R R L L R L L R L

107 L L R L R R

111 R L L R L L L R L R R L R R

115

Detailed description: This is a musical score for a piano exercise, spanning measures 78 to 115. The notation is on a single staff in treble clef. The music consists of a continuous sequence of eighth and sixteenth notes, frequently beamed in groups. Colored dots are placed above certain notes to indicate specific fingerings: cyan (measures 78, 83), orange (measures 78, 83, 95), blue (measures 83, 103), green (measures 87, 99, 107, 111, 115), and purple (measures 91, 91). Above the staff, letters 'L' and 'R' indicate left and right hand movements. Measure 78 is marked with a '3' above it, indicating a triplet. The exercise concludes at measure 115.



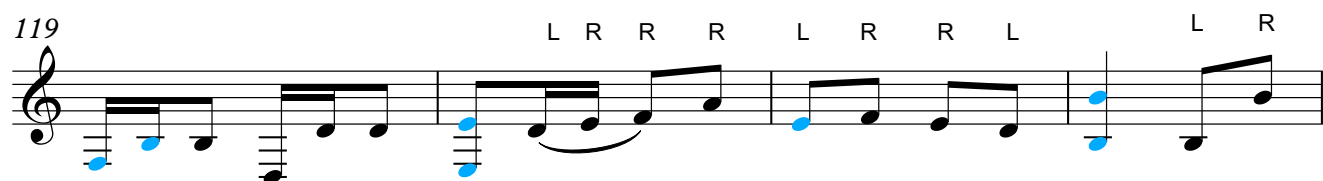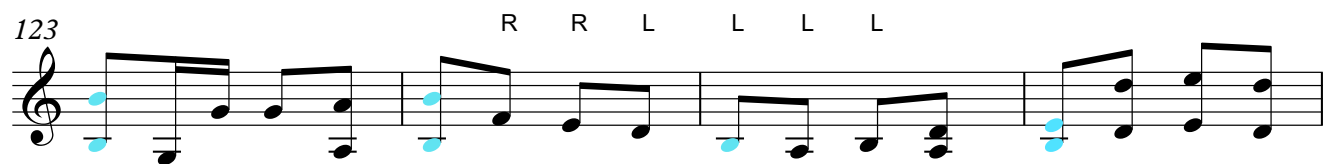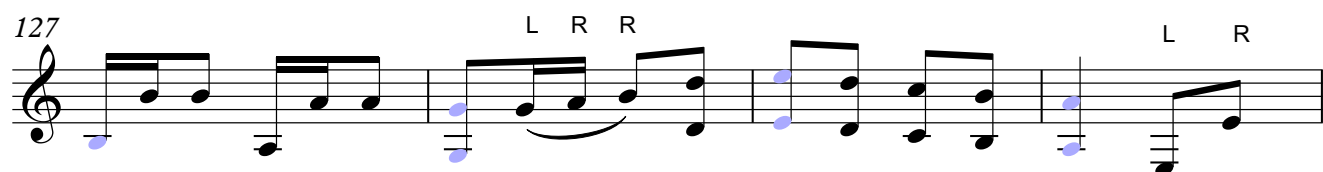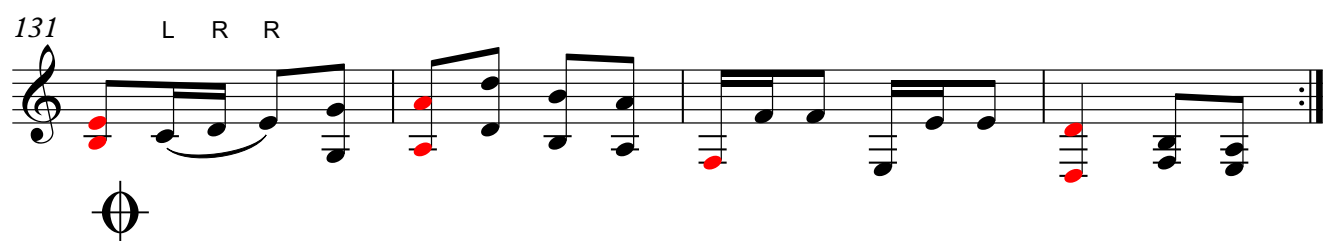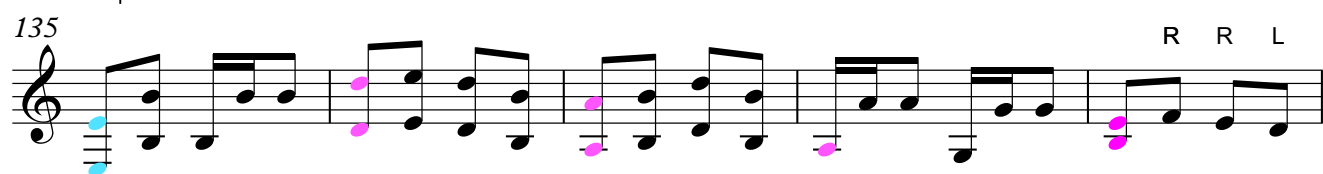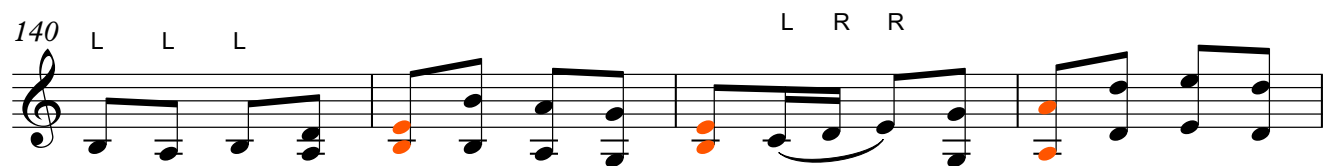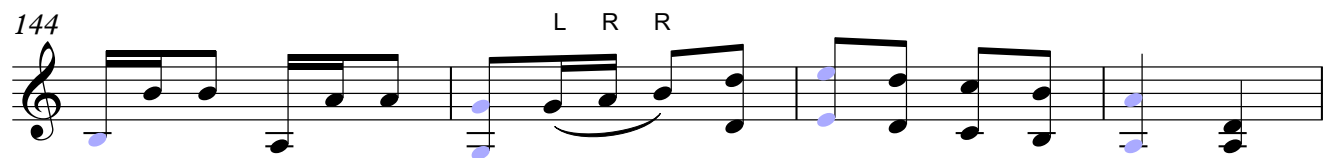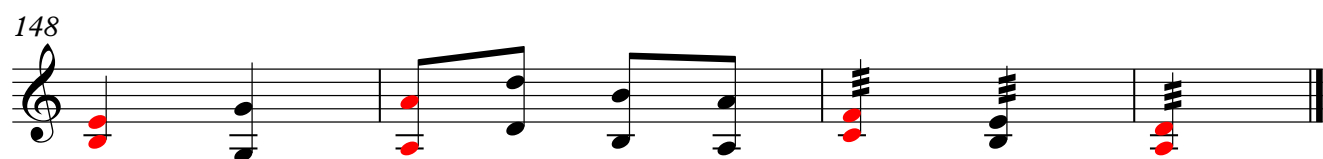

# Sadhukarn

for large gongs circle

Rasi Phumthongsuk (TR)

## Introduction

Taphon

7 L R R

11 L L L R R L R

15 L R

19

23 R L R R

27 L L L R R

31 L R R R

35 L L L R

39 L R R R L R L L

43 L R

47 R R

51 R L L R L R R L R R

55 L R

59

63 R R L L L

67 L L R R R R R L L L L L R R

71 L R R R

75 L R L L L To Coda

The musical score is written in treble clef and consists of ten staves. The notes are primarily eighth and sixteenth notes, often beamed together. The fingerings (L, R) are placed above the notes. The colored notes are: blue (measures 39, 43, 47, 51, 55, 63, 67, 71, 75), purple (measures 43, 47, 51, 55, 63, 67, 71, 75), pink (measures 47, 51, 55, 59, 63, 67, 71, 75), orange (measures 51, 55, 59, 63, 67, 71, 75), and red (measures 63, 67, 71, 75). The piece concludes with a double bar line and the text 'To Coda'.

78 R L L R L R L R R

83

87 L R L R

91 R R L L R R L L R L R R L L L L R R L R R

95 L R

99 L R R

103 L R R R L R L L L R L L R L

107 L L R L R R

111 R L R R L R L R R L R R

115 L R L R R R L L R R L L L R

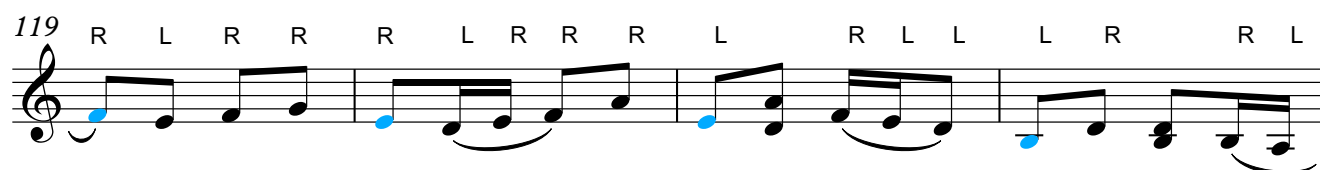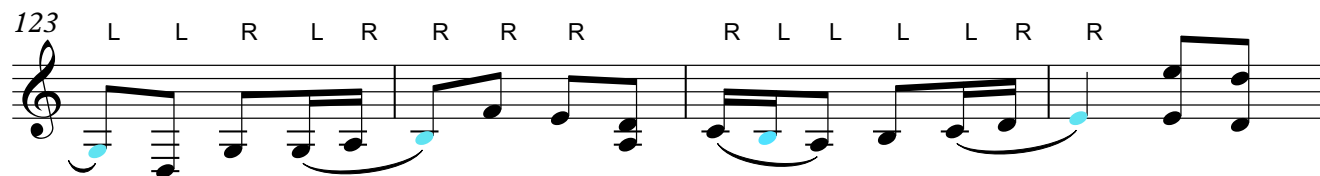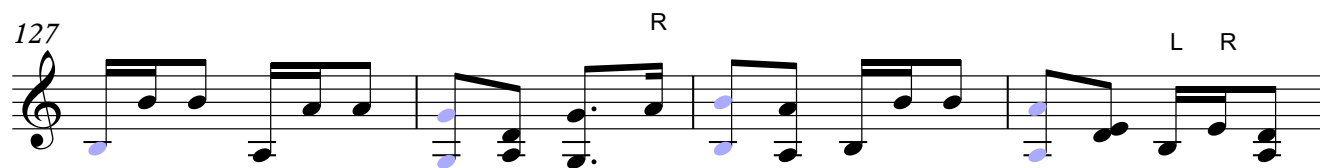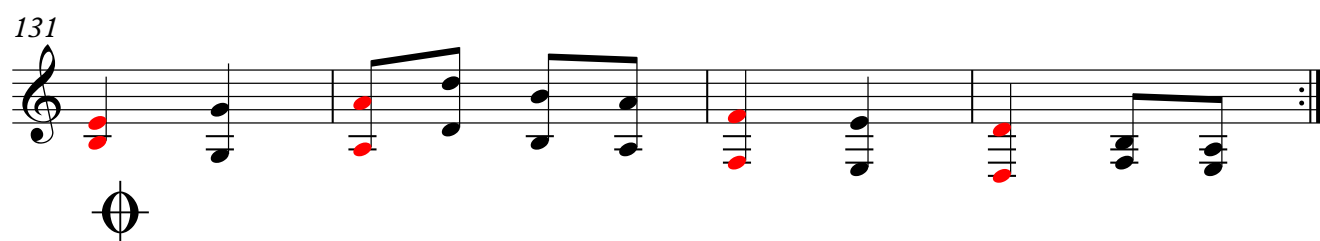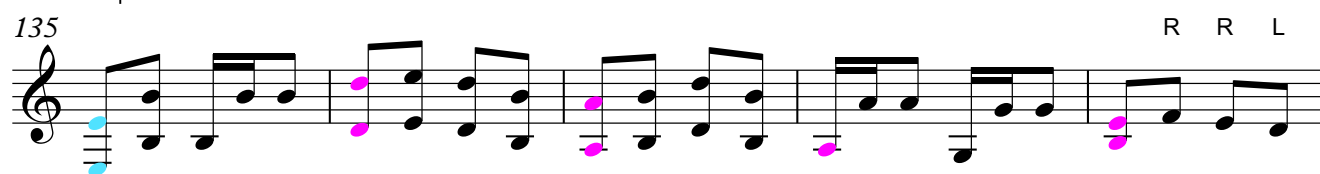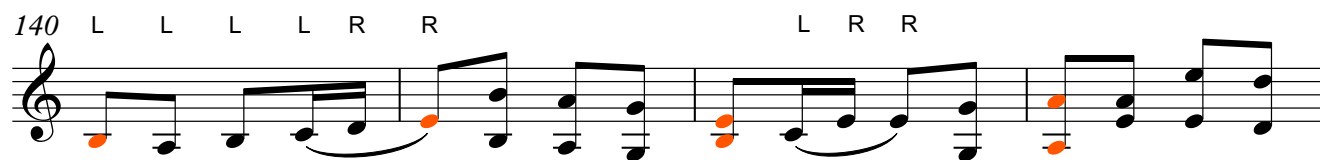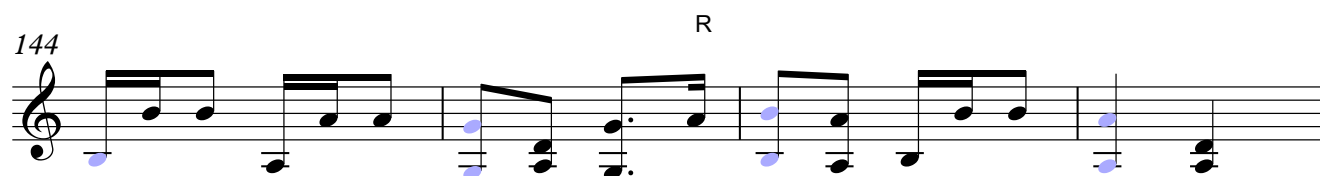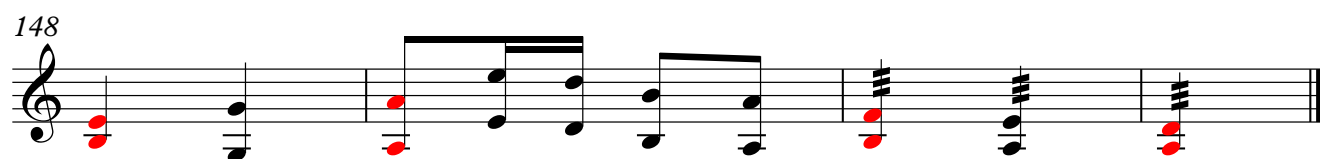

# Sadhukarn

for large gongs circle

Siri Nakdontri (TN)

## Introduction

Taphon

7

11

15

19

23

27

31

35

L R R

L R

R L L L R R

L R R L L L R

R

R

L L L R R

L R R R

L L

39 L R R R L R R L

43 L R R L L L R

47 R R R L

51 L L L L R R

55 L R R L L L R

59 R

63

67

71 L R R R

75 To Coda

The musical score is written on nine staves. The first staff (measures 39-42) has fingerings L R R R L R R L. The second staff (measures 43-46) has fingerings L R R and L L L R. The third staff (measures 47-50) has fingerings R and R R L. The fourth staff (measures 51-54) has fingerings L L L and L R R. The fifth staff (measures 55-58) has fingerings L R R and L L L R. The sixth staff (measures 59-62) has a fingering R. The seventh staff (measures 63-66) has no fingerings. The eighth staff (measures 67-70) has no fingerings. The ninth staff (measures 71-74) has fingerings L R R R. The final staff (measures 75-78) is marked 'To Coda' and has no fingerings. The notes are color-coded: blue (measures 39, 43, 47, 51, 55, 59, 63, 67, 71, 75), purple (measures 43, 55, 67), pink (measures 47, 59), orange (measures 51, 55), and red (measures 63, 67).

78 L L R R L R R 3

83

87 L R R L R L R

91 R R R L L R L L L L L R R L R

95 R L L L R R

99 L R R R L L R R L

103 L R R R L R R L L

107

111 L R R

115 R



[illegible]

131

Musical notation for exercise 131, featuring a treble clef and a key signature of one flat. The melody consists of eighth and quarter notes, with some notes marked in red. The exercise ends with a double bar line and repeat dots.

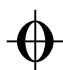

135

R R L

140 L L L L R R R R



The musical notation for exercise 140 is written on a single staff. It begins with a treble clef. The first measure contains two eighth notes, G4 and A4, with a finger number 'L' above the first. The second measure contains two eighth notes, B4 and C5, with a finger number 'L' above the first. The third measure contains two eighth notes, D5 and E5, with a finger number 'L' above the first. The fourth measure contains two eighth notes, F5 and G5, with a finger number 'L' above the first. The fifth measure contains two eighth notes, A5 and B5, with a finger number 'R' above the first. The sixth measure contains two eighth notes, C6 and D6, with a finger number 'R' above the first. The seventh measure contains two eighth notes, E6 and F6, with a finger number 'R' above the first. The eighth measure contains two eighth notes, G6 and A6, with a finger number 'R' above the first. The notes are connected by a series of beams, indicating a continuous melodic line. The notes are colored black, except for the first note of each measure, which is colored orange.

144

L R R

148

Measure 148 of the musical score. It begins with a treble clef. The notation includes a half note G4, a quarter note A4, a quarter note B4, a half note C5, a quarter note D5, a quarter note E5, a quarter note F5, and a quarter note G5. There are also several rests and accidentals (sharps and naturals) throughout the measure.

# Sadhukarn

for large gongs circle

Sangobsuek Dhamvihar(TW)

## Introduction

Taphon

7 R R

11 R L L L L R R

15 L R R L R

19 R L L R

23 L R R L R R

27 L R R R

31 R R L L R

35 L R

39 L R R R L R L L

43 L R R L R

47 R R

51 R L L L L R R

55 L R R L R

59

63

67 R R

71 L R R R

75 L R L L L To Coda

78 L L R R L R R

83

87 L R L R

91 R R R L L R L L L L L R R L R R

95 L R

99 L R R R L L R R R L

103 L R R R L R L L L R L L R L

107 L L R L R R

111 R L L R L L L R L R R L R R

115

119 L R R R L R L L

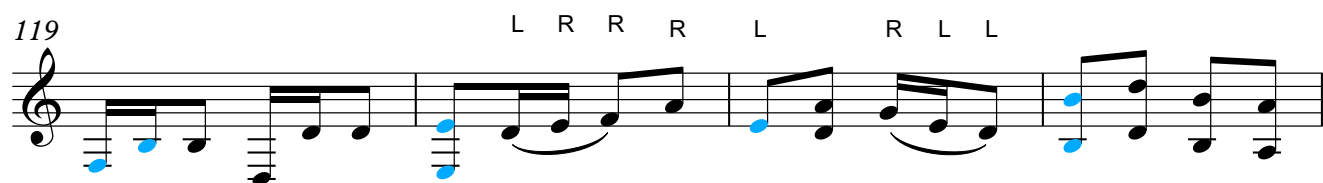

123 R R R L L R L R R R



127 L R R L R

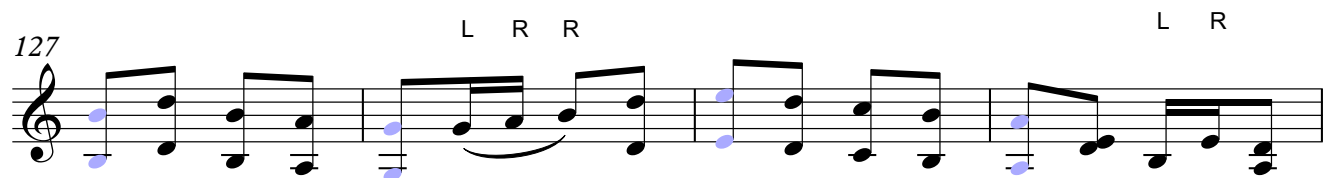

131



♩

135 R R

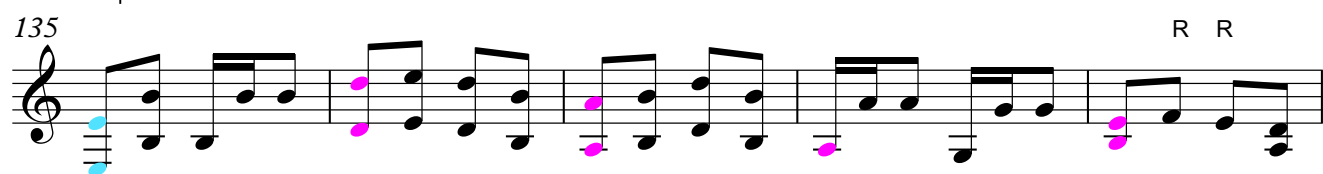

140 R L L L L R R



144 L R R



148



# Sadhukarn

for large gongs circle

Samran Kerdphol II (TS2)

## Introduction

Taphon

7

11

15

19

23

27

31

35

L R R L R R

R R

R L L L L R R L R R

R

L R R

L L L R R

R L L R

L R L R

39

43 R

47 R L L R R L

51 L L L

55 R

59

63 R L R L R

67 R L L R R L L R R L L R R

71 L R R R

75 L R L L L To Coda

78 R L L R L R L R R 3

83 R

87 R L R L R

91 R R R L L L L R L L R R

95

99 R R L L L R

103

107

111 L R R

115 R R R

Detailed description: This is a musical score for a piano exercise, spanning measures 78 to 115. The notation is on a single staff in treble clef. The music consists of a continuous sequence of eighth and sixteenth notes, frequently beamed in groups. Colored dots are placed above certain notes to indicate specific fingerings: cyan (measures 78, 103), orange (measures 78, 95), blue (measures 83, 103), green (measures 87, 99, 111, 115), purple (measures 91, 91), and red (measures 95, 95). Above the staff, letters 'R' and 'L' indicate right and left hand movements. Measure 78 is marked with 'R L L R L R' and ends with a triplet of three notes marked '3'. Measure 83 has an 'R' above it. Measure 87 has 'R L R L R' above it. Measure 91 has 'R R R L L L L R L L R R' above it. Measure 95 has an 'R' above it. Measure 99 has 'R R L L L R' above it. Measure 103 has an 'R' above it. Measure 107 has an 'R' above it. Measure 111 has 'L R R' above it. Measure 115 has 'R R R' above it.



119 R L L R L R R L R R R L R L L L

Musical staff 119: Treble clef, 8 measures. Notes are mostly eighth and sixteenth notes. Some notes are blue. Rhythmic markings are above the staff.

123 R R L L L L

Musical staff 123: Treble clef, 8 measures. Notes are mostly eighth and sixteenth notes. Some notes are blue. Rhythmic markings are above the staff.

127 R

Musical staff 127: Treble clef, 8 measures. Notes are mostly eighth and sixteenth notes. Some notes are blue. Rhythmic markings are above the staff.

131 L R R

Musical staff 131: Treble clef, 8 measures. Notes are mostly eighth and sixteenth notes. Some notes are red. Rhythmic markings are above the staff.

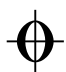

135 R L L R R L

Musical staff 135: Treble clef, 8 measures. Notes are mostly eighth and sixteenth notes. Some notes are pink. Rhythmic markings are above the staff.

140 L L L

Musical staff 140: Treble clef, 8 measures. Notes are mostly eighth and sixteenth notes. Some notes are orange. Rhythmic markings are above the staff.

144 R

Musical staff 144: Treble clef, 8 measures. Notes are mostly eighth and sixteenth notes. Some notes are blue. Rhythmic markings are above the staff.

148 L R R

Musical staff 148: Treble clef, 8 measures. Notes are mostly eighth and sixteenth notes. Some notes are red. Rhythmic markings are above the staff.

# Sadhukarn

for large gongs circle

Subin Chankeaw  
(TJ)

## Introduction

Taphon

7

11

15

19

23

27

31

35

L R

R R L

L L L L R R

L R R L

L R R R

L R

L R R R

L R R

39 L R R R L L

43 L R R L

47 R R L

51 L L L L R R

55 L R R L

59

63 R

67

71 L R R R

75 L R L L L To Coda

The musical score is written on ten staves. The first staff (39) has blue notes and fingerings L R R R L L. The second staff (43) has purple notes and fingerings L R R L. The third staff (47) has pink notes and fingerings R R L. The fourth staff (51) has orange notes and fingerings L L L L R R. The fifth staff (55) has blue notes and fingerings L R R L. The sixth staff (59) has pink notes. The seventh staff (63) has red notes and a fingering R. The eighth staff (67) has purple notes. The ninth staff (71) has blue notes and fingerings L R R R. The tenth staff (75) has blue notes and fingerings L R L L L, ending with a 'To Coda' instruction.

78 R L L R L R L R R 3

83

87 L R R L R L R

91 R R R L L R L L R L L L R R L R R

95 L L L R R

99 L R R R L L R R R L

103 L R R R L R R L L R R L

107 L L R L R R

111 R L L R R L L L R L R R L R R

115 L R L R R R L L R R L L L R R

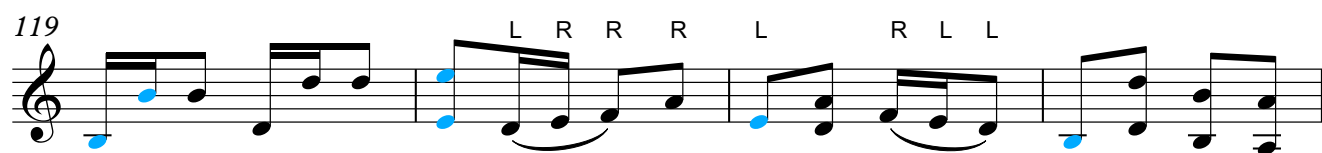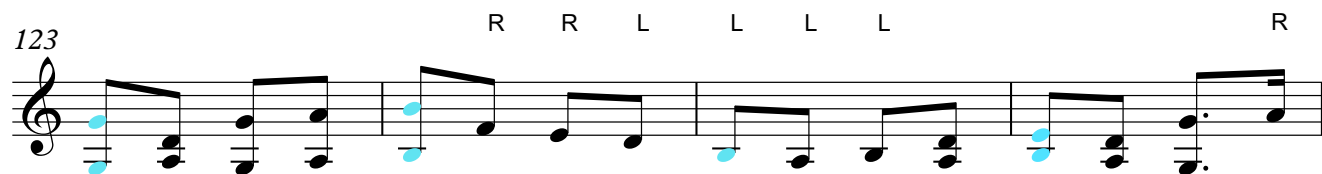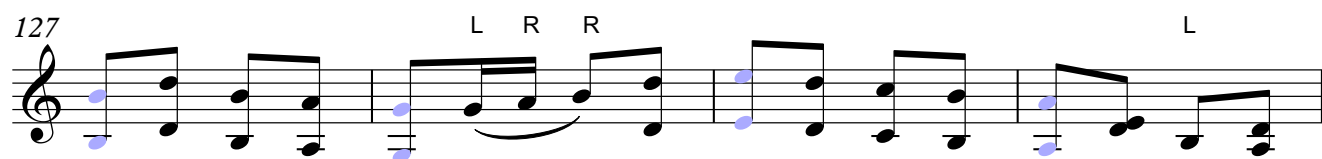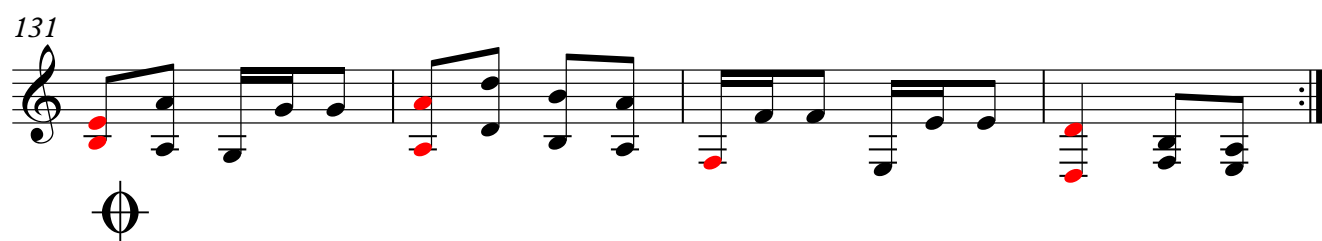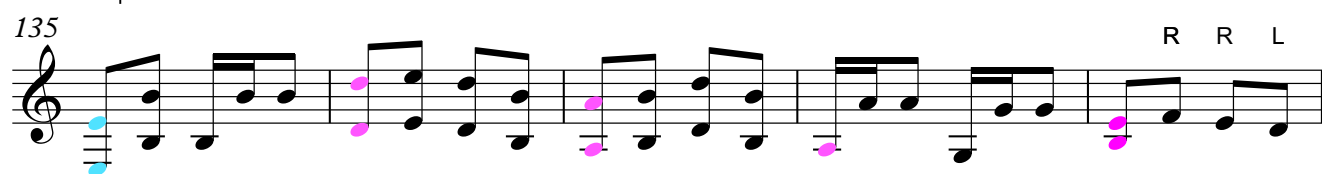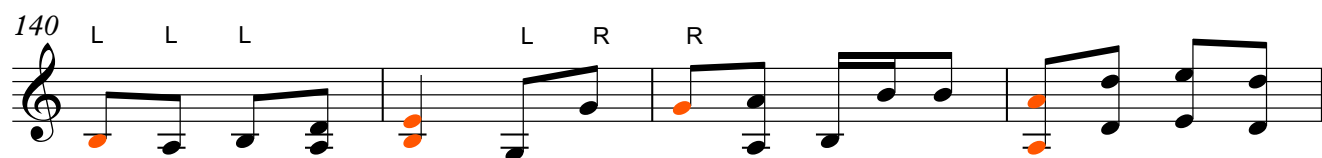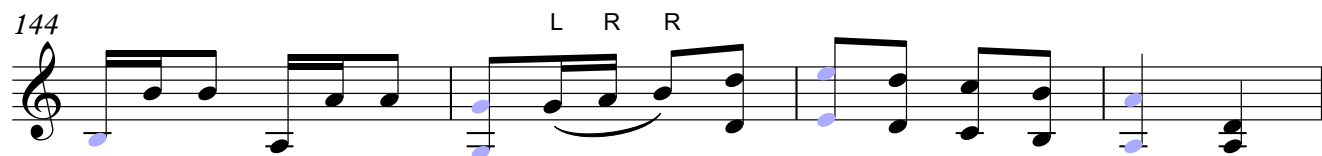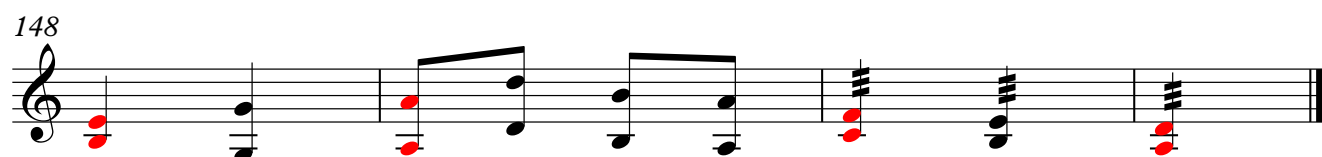

# Sadhukarn Chan Diow

for large gongs circle

Changwang Tua Phatayakosol  
(TTP)

3

7

11

15

19

23

27

31

35

L R R

L R R

R

L R R

R

L R R

L R R

R L L L L L R r

R

L R L R R L L L L

To Coda

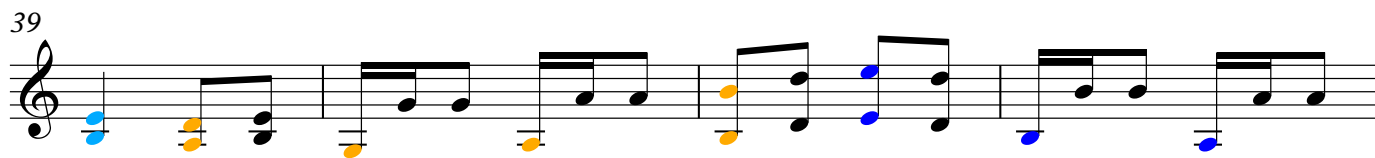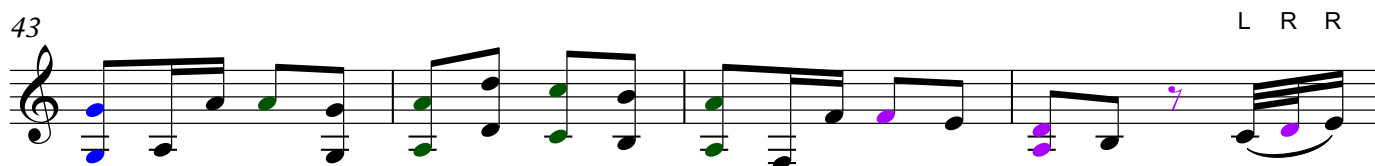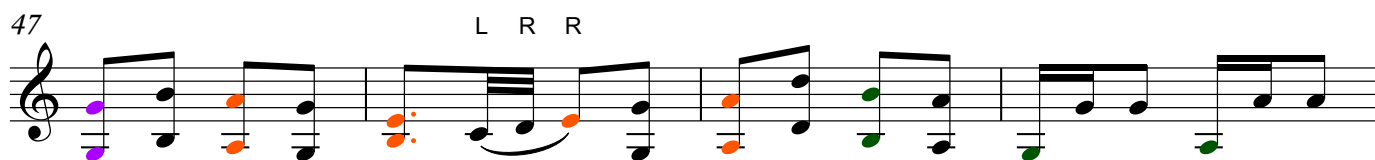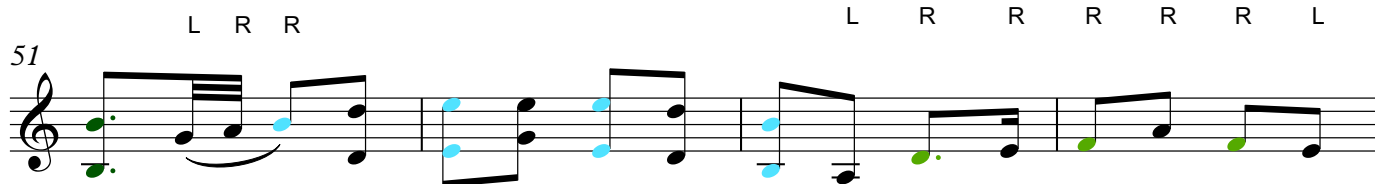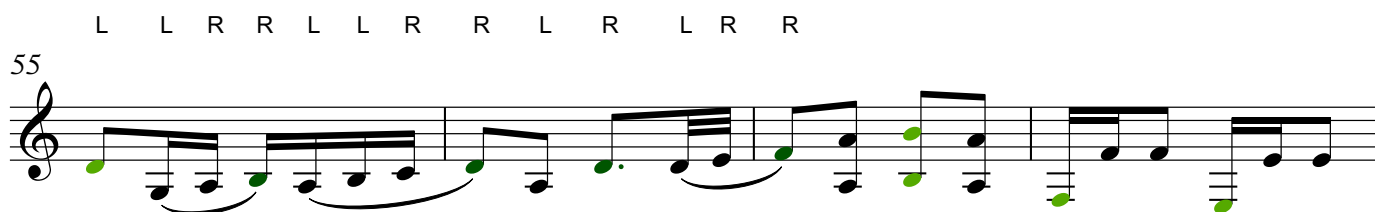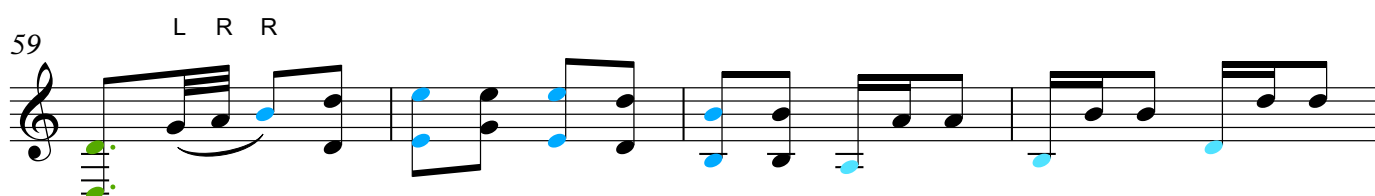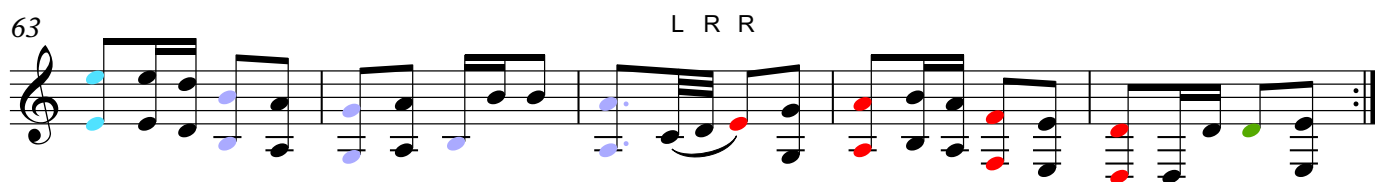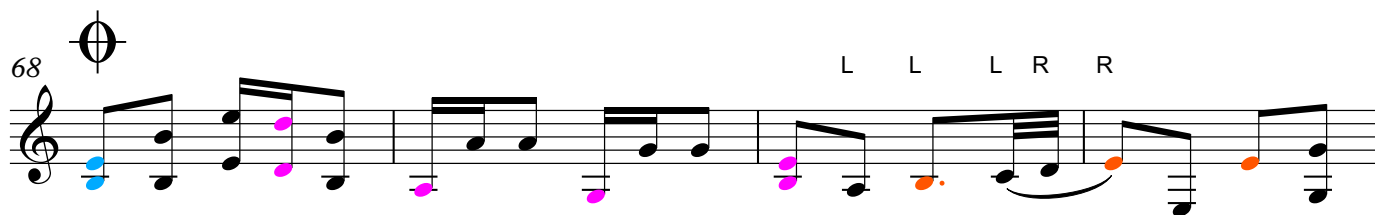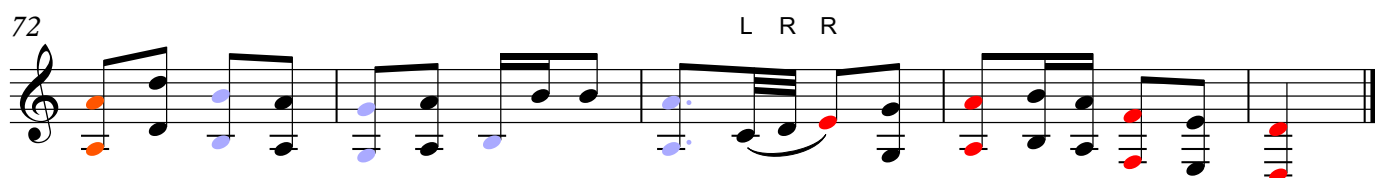

# Sathukar

សាធុការ  
for large gongs circle

Keo Sonankavai I  
(KS1)

## Introduction

Taphon

LGC

## A tempo

5

8

12

16

20



# Sathukar

សាធុការ

for large gongs circle

Keo Sonankavai II  
(KS2)

**Introduction**

Taphon

LGC

**A tempo**

5

8

12

16

20

24

27

31

R R L

R

3

L R R R L L L R L R R R L R L L

R L L L R R L R R L R R L R L R L R R R L R L R L R R R

L R R R L R L R R R R L L

R R

R R R

L R

L R L R L R L R L R L R L R L R R R L R

L R L R R L R L R R L R

R R R L R L R

R R R L R L L R R

L R L R L R R

35 R L R R R L R R R L R L R L R L R L R R

40 R L R R L R R L R L R L R R L R L R R R L R L R L

44 R L R L R L R L R L R L

48 R R R L R L R L R R

52 R R R R L R L R L R L R L

56 R L R R R R R

60 R R L L R R

64 R R L R R L R R L R R L R R R L L R R L R R

68 R R L R L R

72 R R L R L R L R R L R

76 L R R R L R L L R R L

## Sathukar

សាធុការ

for large gongs circle

Royal University of Fine Arts

(KR)

## Introduction

**Taphon**

**LGC**

R L R R L R R L R R L R R L R R L L R R L R

A tempo

6 R R L R R L R L R R L

9 R L R R L R L R L R R L R R L R L R R R r

13 L R R R L R R R L R L R L R L R L R L R L R R L

17 R L R L R R R L R R L R R L R L R L R L R R L R L L R

21 R L R R L R R L R L R L R L R L R L R L R L R L

25 L R R R L R R L R L R L R L R L R L R L R L R L

29 R L L R L R R L R L R L R L R L R L R L R L R L

33 L R L R L R L R L R L R L R L R L R L R L R L

37 L L R R L R R L R R L R

41 R R L L R R L L R R L L R R R L R R L

45 R L R L R R R L R R L R R L R L R L R R R L R L L R

49 R R R L R R R R

53 L R R R L R R R L R R L R R L

57 R L R L R R R L R R L R R L R L R L R R R L R L L R

61 R

65 R L R R L R L R L R R L R R R L

69 L R R L L R R R L R R R L R R L L R R L R R

73 L R R L R R R L L R R L

77 L R R L L

81 L R R L R L R R L R R L R L

85 R L L R R R L R

89 L R R L R L R L R R L

93 R R L R L R L R L

97 R L R

101 R R L R L R R R R L R R L R

105 R R R L R R L R R R L L R R L L R R L L R R R L R L R

109 L L L L R R R R R

113 L R R L R L

117 R L R R R R R R R L R R L

121 L R R R L R R R L L R R L L L R R L

125 R R R L R R R L R R R L R R L R R L R L

129 L R R L R R R L

133 R R L L R R

The image displays three staves of musical notation, each with a treble clef. The first staff, starting at measure 125, features a sequence of rhythmic markings: 'R', 'R R L', 'R R R L', 'R R R L', 'R R L R', and 'R L R L'. Notes are marked with blue dots. The second staff, starting at measure 129, has markings 'L R R L R' and 'R R L'. Notes are marked with purple dots. The third staff, starting at measure 133, has markings 'R R L L R R'. Notes are marked with red dots. The notation includes various note values, rests, and slurs, indicating a complex rhythmic pattern.

# Sadhukarn

for large gongs circle

Ban Pang Lang (IP)

**Introduction**

Taphon

LGC

**A tempo**

7

11

15 L R R L L L R

19 R L R R R R R R L R R R

23 L R R L R

27 R R L L L L R R R R

31 R R L R R R

The musical score is written for two instruments: Taphon and LGC. The time signature is 2/4. The score begins with an Introduction section. The main section is marked 'A tempo'. The score is divided into measures, with some measures containing specific rhythmic patterns (L, R) and others containing specific notes (green, blue, orange, pink). The score is written in treble and bass staves.

[illegible]



75 R R L L R R L L L R L R R L L L L R R L R R R

79 L R R L R L R R

83

87 R R L R

91 R R L L R R L L L R L R R

95 R R L L L L R R

99

103 L R R R L R L R L R L L

107 R L R R L R L

111 L R R L R R L R R

115 R R L

119 L L L R R L R R R L R L R L R R L L

123

127 L R R R L L L L R

131 R R R

The musical score consists of four staves, each representing a measure of music. The first staff (measure 119) contains a sequence of notes with fingerings L, L, L, R, R, L, R, R, R, L, R, L, R, R, L, L. The second staff (measure 123) shows a series of eighth notes with blue dots indicating fingerings. The third staff (measure 127) features a sequence of notes with purple dots indicating fingerings, followed by a group of notes with fingerings L, R, R, R, L, L, L, L, R. The fourth staff (measure 131) begins with a red dot indicating a fingering, followed by a sequence of notes with red dots indicating fingerings, and ends with a double bar line.

# Sadhukarn

for large gongs circle

Ban Nong Sai (IN)

**Introduction**

Taphon

LGC

7

11

15 L R L R L L

19 R L R R R R R R L R

23 L R

27 L L L R R L R L R L

31 R L R L R L R R L R R L R

35 L R

39 R R L R L R R L L R R L L

43 L L

47 L R L R R R R L R L R

51 L R L R L

55 L R L L

59 L R L R

63 L R L R R R R L R L R L

67

71

75 R R L R

79 L R R L R L R R

83

87 L R L R

Musical staff 87-90: Treble clef, 4/4 time. Measures 87-90 contain eighth and sixteenth notes. Measure 87 has a green dot on the first eighth note. Measure 88 has a green dot on the first eighth note. Measure 89 has a green dot on the first eighth note. Measure 90 has a green dot on the first eighth note.

91 R R R R L L L R

Musical staff 91-94: Treble clef, 4/4 time. Measures 91-94 contain eighth and sixteenth notes. Measure 91 has a purple dot on the first eighth note. Measure 92 has a purple dot on the first eighth note. Measure 93 has a purple dot on the first eighth note. Measure 94 has a purple dot on the first eighth note.

95

Musical staff 95-98: Treble clef, 4/4 time. Measures 95-98 contain eighth and sixteenth notes. Measure 95 has an orange dot on the first eighth note. Measure 96 has an orange dot on the first eighth note. Measure 97 has an orange dot on the first eighth note. Measure 98 has an orange dot on the first eighth note.

99

Musical staff 99-102: Treble clef, 4/4 time. Measures 99-102 contain eighth and sixteenth notes. Measure 99 has a green dot on the first eighth note. Measure 100 has a green dot on the first eighth note. Measure 101 has a green dot on the first eighth note. Measure 102 has a green dot on the first eighth note.

103 R R L R L R R L L R R L L R R R L R L R

Musical staff 103-106: Treble clef, 4/4 time. Measures 103-106 contain eighth and sixteenth notes. Measure 103 has a blue dot on the first eighth note. Measure 104 has a blue dot on the first eighth note. Measure 105 has a blue dot on the first eighth note. Measure 106 has a blue dot on the first eighth note.

107 L R L R L R L R

Musical staff 107-110: Treble clef, 4/4 time. Measures 107-110 contain eighth and sixteenth notes. Measure 107 has a green dot on the first eighth note. Measure 108 has a green dot on the first eighth note. Measure 109 has a green dot on the first eighth note. Measure 110 has a green dot on the first eighth note.

111 R R R L R L R L R L R L R L R L R R

Musical staff 111-114: Treble clef, 4/4 time. Measures 111-114 contain eighth and sixteenth notes. Measure 111 has a green dot on the first eighth note. Measure 112 has a green dot on the first eighth note. Measure 113 has a green dot on the first eighth note. Measure 114 has a green dot on the first eighth note.

115 L R R R R L

Musical staff 115-118: Treble clef, 4/4 time. Measures 115-118 contain eighth and sixteenth notes. Measure 115 has a green dot on the first eighth note. Measure 116 has a green dot on the first eighth note. Measure 117 has a green dot on the first eighth note. Measure 118 has a green dot on the first eighth note.

119 L L R R R L R R L L L R R L R L R L R

Musical staff 119-122: Treble clef, 4/4 time. Measures 119-122 contain eighth and sixteenth notes. Measure 119 has a blue dot on the first eighth note. Measure 120 has a blue dot on the first eighth note. Measure 121 has a blue dot on the first eighth note. Measure 122 has a blue dot on the first eighth note.

123 R L R L R R R L R R L

Musical staff 123-126: Treble clef, 4/4 time. Measures 123-126 contain eighth and sixteenth notes. Measure 123 has a blue dot on the first eighth note. Measure 124 has a blue dot on the first eighth note. Measure 125 has a blue dot on the first eighth note. Measure 126 has a blue dot on the first eighth note.

129 R R

Musical staff 129-132: Treble clef, 4/4 time. Measures 129-132 contain eighth and sixteenth notes. Measure 129 has a red dot on the first eighth note. Measure 130 has a red dot on the first eighth note. Measure 131 has a red dot on the first eighth note. Measure 132 has a red dot on the first eighth note.

# Sadhukarn

for large gongs circle

Boonthieng Sisackda I  
(LB1)

## Introduction

Taphon

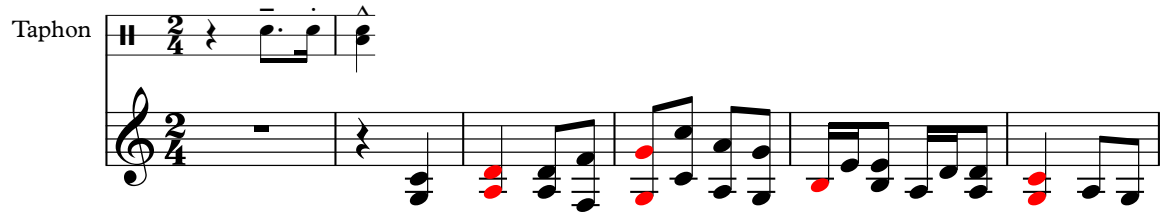

7 R R L



11 L L L

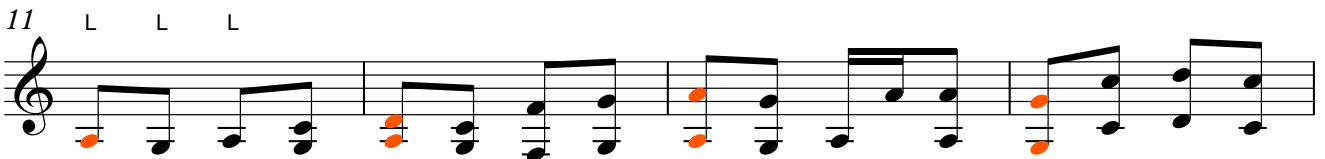

15 R R L R



19

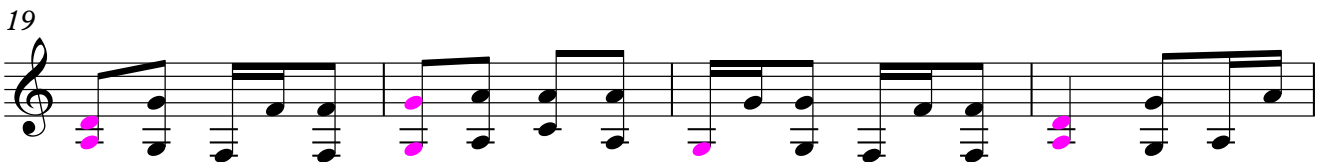

23 L R R



27 R R L R



31 R R L

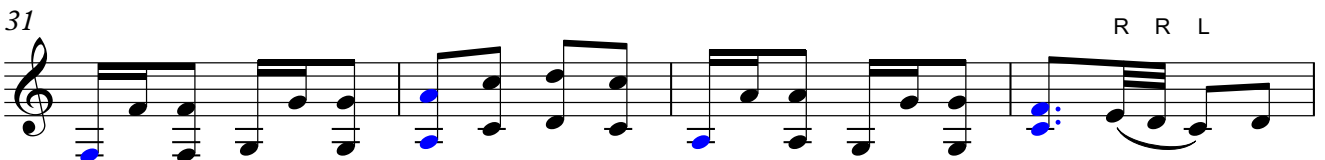

35



39 L R R R L R R L

43 R R L

47 R R L

51 L L L

55 R R L R

59

63

67 R R R L R R R L L L R R

71 L R R

75

78 R R L L R R

83

87

91 R R R L R R R L L L R R L R R

95 R R L

99

103 L R R R L R R L L L L

107

111 L R R

115



119 L R R R L R R L

123 R R L L L L

127 R R L R

131

The musical score consists of four staves, each containing measures 119 through 131. The notation includes various note values (quarter, eighth, and sixteenth notes) and rests. Fingerings are indicated by letters L and R above the notes. The notes are color-coded: blue for measures 119-123, purple for measure 127, and red for measure 131. The score ends with a double bar line at the end of measure 131.

# Sadhukarn

for large gongs circle

Boonthieng Sisackda II  
(LB2)

## Introduction

Taphon



7 R R L



11 L L L



15 R R L R



19

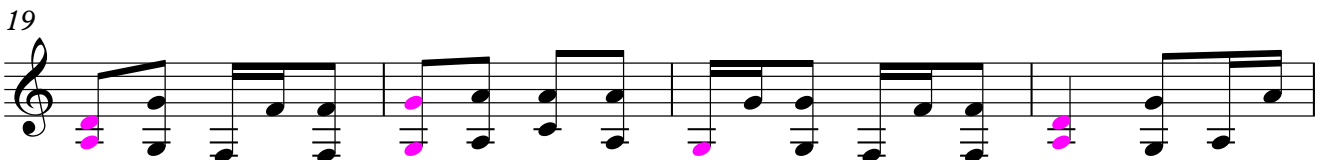

23 L R R



27 R R L R



31 R R L

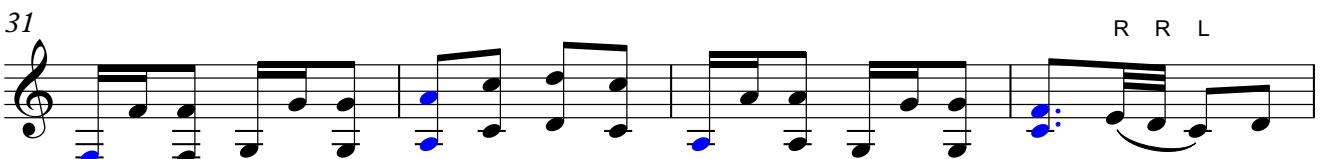

35



39 L R R R L R R L

43 R R L

47 R R L

51 L L L

55 R R L R

59

63

67 R R R L R R R L L L R R

71 L R R

75

78 R R L L R R

83

87

91 R R R L R R R L L L R R L R R

95 R R L

99

103 L R R R L R R L L L L

107

111 L R R

115

119 L R R R L R R L

123 R R L L L L

127 R R L R

133

The image shows a musical score for four staves, measures 119-133. The notation includes treble clefs, eighth and sixteenth notes, rests, and fingerings. Some notes are color-coded: blue for measures 119-123, purple for measure 127, and red for measure 133. Fingerings are indicated by letters L and R above the notes.

# Sadhukarn

for large gongs circle

Boonthieng Sisackda III  
(LB3)

## Introduction

Taphon

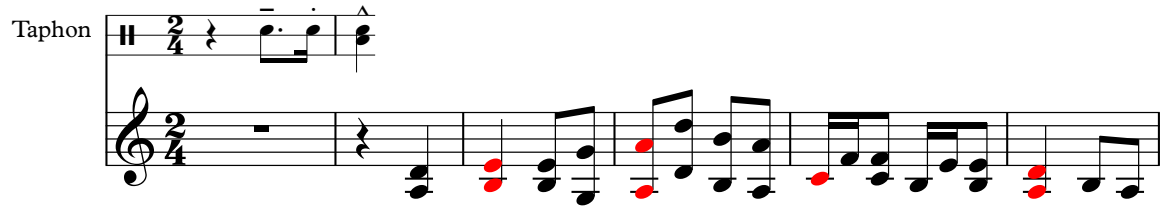

7 R R L



11 L L L



15 R R L R

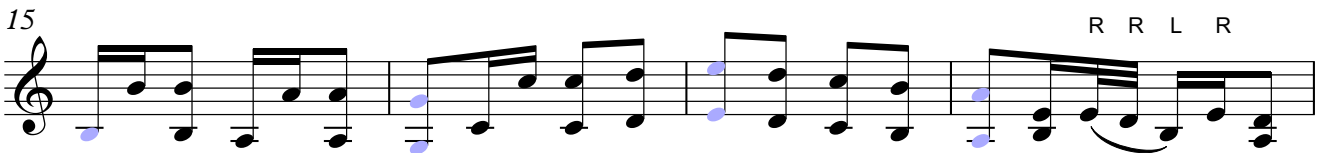

19

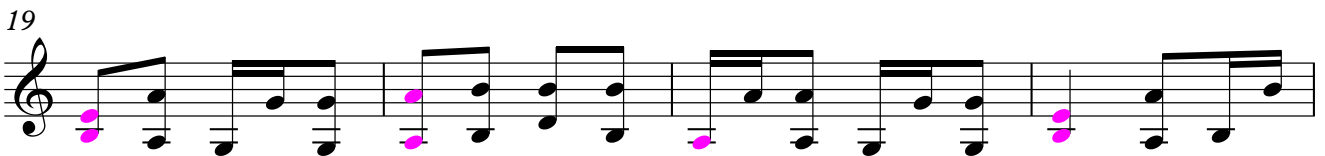

23 L R R



27 R R L R



31 R R L

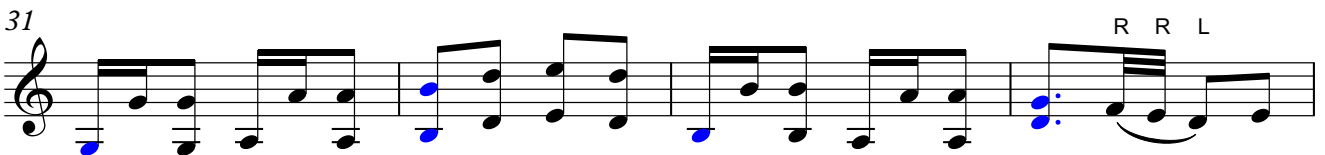

35



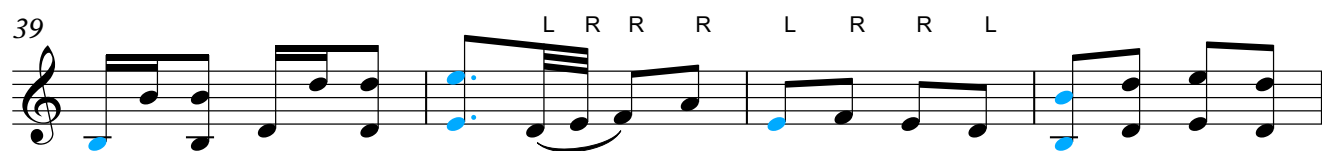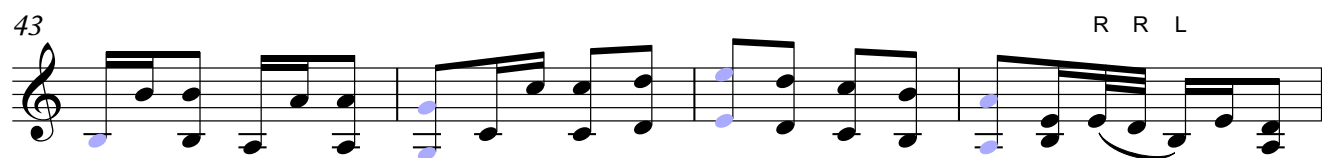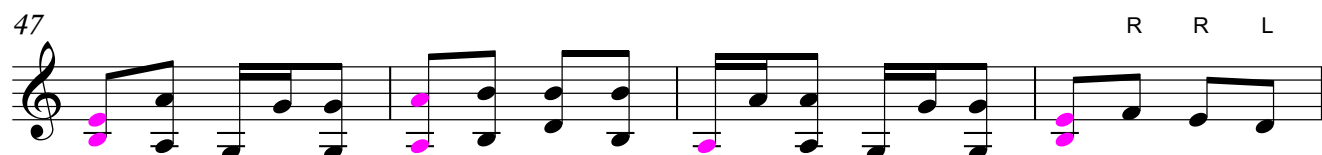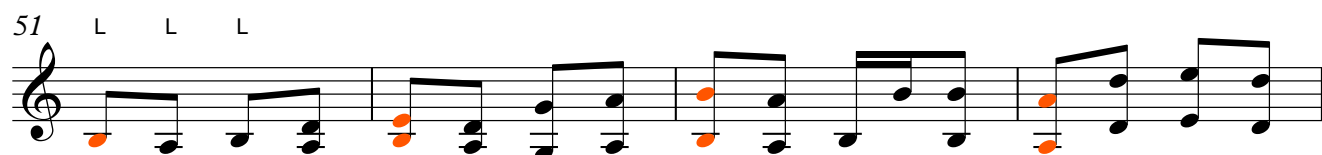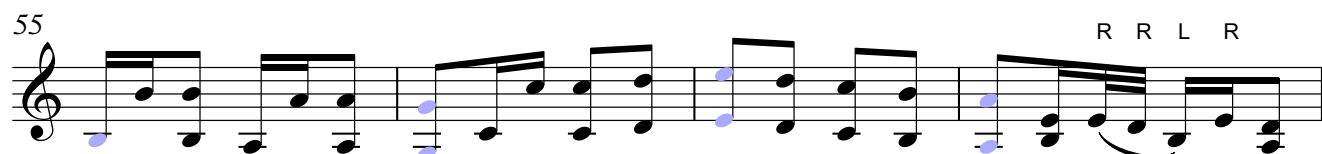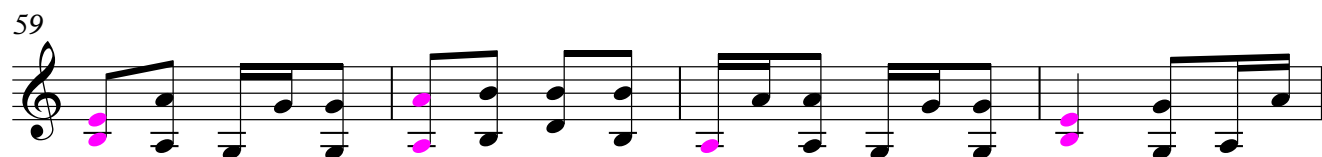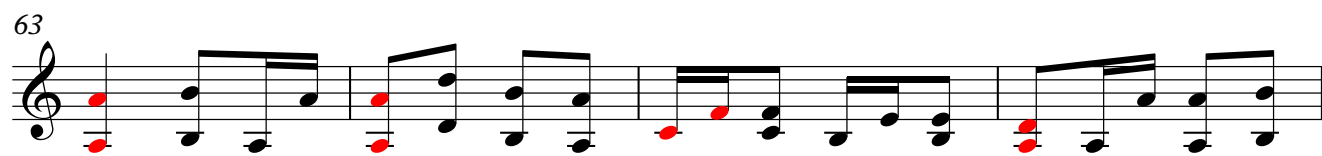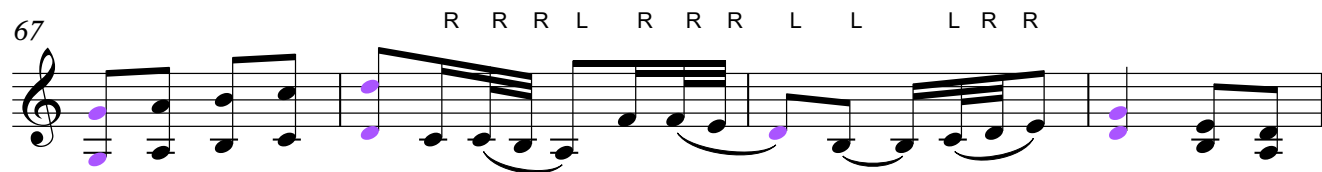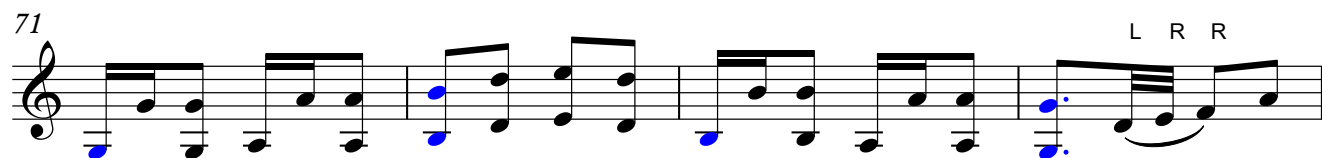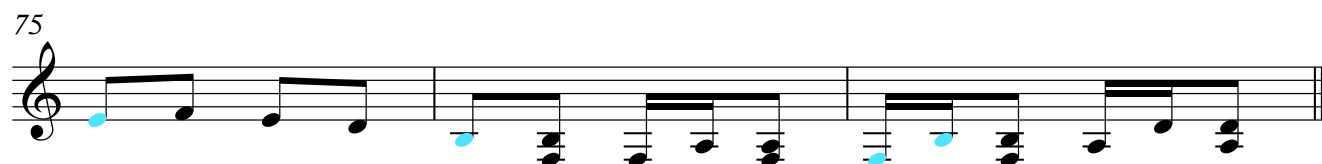

78 R R L L R R

[illegible]

87



Measure 87: Treble clef. The staff contains a series of eighth and sixteenth notes. The notes are primarily black, with some green notes. The rhythm is complex, with many beamed notes.

91

R R R L R R R L L L R R L R R

A musical staff in treble clef showing a sequence of notes and rests. The notes are mostly eighth and sixteenth notes, some beamed together. There are several purple dots placed below specific notes. Above the staff, there is a sequence of letters: R R R L R R R L L L R R L R R.

95

R R L



99

Musical notation for measure 99. The notation is on a single staff with a treble clef. The key signature has one flat (B-flat). The melody is written in eighth and quarter notes. There are green dots under some notes, likely indicating fingerings. The bass line has a whole note chord in the middle of the measure.

103

L R R R L R R L L L L

107



111

L R R

115





119 L R R R L R R L

123 R R L L L L

127 R R L R

131

The image shows a musical score for four staves, measures 119-131. The notation includes treble clefs, eighth and sixteenth notes, rests, and slurs. Colored dots (blue, purple, red) are placed on specific notes. Fingerings (L, R) are indicated above the notes.

Staff 1 (Measures 119-122): Treble clef. Measure 119: eighth notes G4, A4, B4, C5. Measure 120: eighth notes D5, E5, F5, G5. Measure 121: eighth notes G5, F5, E5, D5. Measure 122: eighth notes C5, B4, A4, G4. Fingerings: L, R, R, R, L, R, R, L.

Staff 2 (Measures 123-126): Treble clef. Measure 123: eighth notes G4, A4, B4, C5. Measure 124: eighth notes D5, E5, F5, G5. Measure 125: eighth notes G5, F5, E5, D5. Measure 126: eighth notes C5, B4, A4, G4. Fingerings: R, R, L, L, L, L.

Staff 3 (Measures 127-130): Treble clef. Measure 127: eighth notes G4, A4, B4, C5. Measure 128: eighth notes D5, E5, F5, G5. Measure 129: eighth notes G5, F5, E5, D5. Measure 130: eighth notes C5, B4, A4, G4. Fingerings: R, R, L, R.

Staff 4 (Measures 131-134): Treble clef. Measure 131: eighth notes G4, A4, B4, C5. Measure 132: eighth notes D5, E5, F5, G5. Measure 133: eighth notes G5, F5, E5, D5. Measure 134: eighth notes C5, B4, A4, G4. Fingerings: R, R, L, R.

# Sadhukarn

for large gongs circle

Boonyadet Muensanit (LY)

**Introduction**

Taphon

LGC

7 R R R L R R L

11 L R L R L R L R R L R L R R

15 R R L R

19 R L R R

23 L R R

27 R R L R L R R

31

35 R L L R R L R

39 L R R R L R R L

43 L R R R L R

47 R R R L R R L

51 R L R L R L R R L R L R L R R

55 R R L R

59 R R R

63 L R R R R L L R L R L R

67

71 L R L R

75 R R L L R R L L L R R R L L R L R L R L R

79 L R R

83

87 L R R L

Musical staff 87-90. Treble clef, 4/4 time. Notes: 87 (G4, A4), 88 (B4, C5), 89 (D5, E5), 90 (F5, G5). Fingering: L, R, R, L. Accents on G4, B4, D5, F5.

91 L R L L R R L L R R L R

Musical staff 91-94. Treble clef, 4/4 time. Notes: 91 (G4, A4), 92 (B4, C5), 93 (D5, E5), 94 (F5, G5). Fingering: L, R, L, L, R, R, L, L, R, R, L, R. Accents on G4, B4, D5, F5.

95 R R

Musical staff 95-98. Treble clef, 4/4 time. Notes: 95 (G4, A4), 96 (B4, C5), 97 (D5, E5), 98 (F5, G5). Fingering: R, R. Accents on G4, B4, D5, F5.

99 L R R

Musical staff 99-102. Treble clef, 4/4 time. Notes: 99 (G4, A4), 100 (B4, C5), 101 (D5, E5), 102 (F5, G5). Fingering: L, R, R. Accents on G4, B4, D5, F5.

103 L R R R L R R L

Musical staff 103-106. Treble clef, 4/4 time. Notes: 103 (G4, A4), 104 (B4, C5), 105 (D5, E5), 106 (F5, G5). Fingering: L, R, R, R, L, R, R, L. Accents on G4, B4, D5, F5.

107

Musical staff 107-110. Treble clef, 4/4 time. Notes: 107 (G4, A4), 108 (B4, C5), 109 (D5, E5), 110 (F5, G5). Accents on G4, B4, D5, F5.

111

Musical staff 111-114. Treble clef, 4/4 time. Notes: 111 (G4, A4), 112 (B4, C5), 113 (D5, E5), 114 (F5, G5). Accents on G4, B4, D5, F5.

115 R R L

Musical staff 115-118. Treble clef, 4/4 time. Notes: 115 (G4, A4), 116 (B4, C5), 117 (D5, E5), 118 (F5, G5). Fingering: R, R, L. Accents on G4, B4, D5, F5.

119 L R L R R

Musical staff 119-122. Treble clef, 4/4 time. Notes: 119 (G4, A4), 120 (B4, C5), 121 (D5, E5), 122 (F5, G5). Fingering: L, R, L, R, R. Accents on G4, B4, D5, F5.
