# Supplementary material
Source: MDPI journal article supplement (https://www.mdpi.com/2306-5729/7/11/150)
Supplement: s1 [file s1]

## **Supplementary Materials**

**Title: Manual conversion of Sadhukarn to Thai and Western Music Notations and Their Translation into a Rhyme structure for music analysis.**

**Sumetus Eambangyung <sup>1\*</sup>, Gretel Schwörer – Kohl <sup>1</sup> and Witoon Purahong <sup>2</sup>**

<sup>1</sup> Institut für Musik, Medien- und Sprechwissenschaften (IMMS) Abteilung  
Musikwissenschaft, Martin – Luther – Universität Halle – Wittenberg, 06099 Halle (Saale),  
Germany

<sup>2</sup> Department of Soil Ecology, UFZ-Helmholtz Centre for Environmental Research,  
D-06120 Halle (Saale), Germany

\* Author to whom correspondence should be addressed.

**Supplementary File S2:** Thai solfege notation of Sadhukarn main melody  
collected in Thailand, Cambodia, and Laos.

# Sadhukarn

Intro.

Thai Fine Arts Department (TF)

|     |   |          |         |          |          |          |          |         |           |          |
|-----|---|----------|---------|----------|----------|----------|----------|---------|-----------|----------|
|     | R | - - - ร  | - ม - ม | - - - ม  | - ช - ล  | - - -    | - ล - ล  | - - - ช | - - - ร   | 0        |
|     | F | ล        | ทุ ม    | ทุ       | ช ล      | ล        |          | ช       | ล         |          |
| 1.1 |   | - - - ทุ | - ล -   | ร ร -    | ม ม - ฬ  | - ล - ทุ | - ล -    | ฬ ฬ -   | ม ม - ร   | 1 [33]   |
|     |   | ฬ        | ม ร     | ม        | ฬ        | ล ทุ     | ล ฬ      | ม       | ร         |          |
|     |   | - ฬ - ม  | - ร - - | ด - -    | - - รม   | - ล ล    | - ทุ - ล | - ช - ม | - ช - ล   | 2 [34]   |
|     |   |          | ล       | ทุ       | ทุ       | ด        | ล        | ทุ ล    | ช ทุ      | ช ล      |
|     |   | - ร - ม  | - ร -   | ทุ ทุ -  | ล ล - ช  | - ร - ช  | - - ล ทุ | - ล -   | ทุ ทุ - ล | 3 [35]   |
|     |   | ร ม      | ร ทุ    | ล        | ช        | ล ช      | ทุ       | ล ทุ    | ล         |          |
|     |   | - ม -    | ม ร - ม | - ล -    | ช ช - ล  | - ทุ - ร | - ทุ -   | ล ล -   | ช ช - ม   | 4 [36]   |
|     |   | ร ทุ     | ล ทุ    | ล ช      | ล        | ทุ ร     | ทุ ล     | ช       | ทุ        |          |
| 2.1 |   | - - - ร  | - - - ช | - - ล ทุ | - ล - ทุ | - ล ล    | - ทุ - ร | - ม - ร | - ทุ - ล  | 5 [37]   |
|     |   | ล        | ช       | ทุ       | ล ทุ     | ล        | ทุ ร     | ม ร     | ทุ ล      |          |
|     |   | - ทุ - ร | - ทุ -  | ล ล -    | ช ช - ม  | - ม -    | ม ร - ม  | - ล -   | ช ช - ล   | 6 [38]   |
|     |   | ทุ ร     | ทุ ล    | ช        | ทุ       | ร ทุ     | ล ทุ     | ล ช     | ล         |          |
|     |   | - ทุ ล ล | - - ล   | - ร - ช  | - ล - ทุ | - ร - ม  | - ร -    | ทุ ทุ - | ล ล - ช   | 7 [39]   |
|     |   | ร        | ล       | ล ช      | ล ทุ     | ร ม      | ร ทุ     | ล       | ช         |          |
|     |   | - - ฬ    | - ม -   | - ร - ร  | - - - ช  | - ร - ทุ | - ล -    | ช ช -   | ล ล - ทุ  | 8 [40]   |
|     |   | มร       | ร       | ล        | ช        | ร ทุ     | ล ช      | ล       | ทุ        |          |
| 3.1 |   | - ทุ -   | ล ล -   | ทุ ทุ -  | ร ร - ม  | - - มฬ   | - ล - -  | - ล - - | ฬ - ทุ    | 9 [41]   |
|     |   | ทุ ล     | ทุ      | ร        | ม        | ร        | ม        | ร       | มร        | ทุ       |
|     |   | - ร - ม  | - ร -   | ทุ ทุ -  | ล ล - ช  | - ร - ช  | - - ล ทุ | - ล -   | ทุ ทุ - ล | 10 [42]  |
|     |   | ร ม      | ร ทุ    | ล        | ช        | ล ช      | ทุ       | ล ทุ    | ล         |          |
|     |   | - ม -    | ม ร - ม | - ล -    | ช ช - ล  | - ทุ - ร | - ทุ -   | ล ล -   | ช ช - ม   | 11 [43]  |
|     |   | ร ทุ     | ล ทุ    | ล ช      | ล        | ทุ ร     | ทุ ล     | ช       | ทุ        |          |
|     |   | - ฬ - ม  | - ร - - | ด - -    | - - รม   | - ล ล    | - ทุ - ล | - ช - ม | - ช - ล   | 12 [44]  |
|     |   |          | ล       | ทุ       | ทุ       | ด        | ล        | ทุ ล    | ช ทุ      | ช ล      |
| 4.1 |   | - ร - ม  | - ร -   | ทุ ทุ -  | ล ล - ช  | - ร - ช  | - - ล ทุ | - ล -   | ทุ ทุ - ล | 13 [45]  |
|     |   | ร ม      | ร ทุ    | ล        | ช        | ล ช      | ทุ       | ล ทุ    | ล         |          |
|     |   | - -      | - ร ม   | - - ม    | - ช - ล  | - ทุ - ร | - ทุ -   | ล ล -   | ช ช - ม   | 14 [46]  |
|     |   | ล ทุ     | ทุ      | ม        | ช ล      | ทุ ร     | ทุ ล     | ช       | ทุ        |          |
|     |   | - - ล ช  | - ล ล   | - - ล ทุ | - ล ล    | - ร - ทุ | - ล -    | ฬ ฬ -   | ม ม - ร   | 15 [47]  |
|     |   | ช        | ล       | ทุ       | ล        | ร ทุ     | ล ฬ      | ม       | ร         |          |
|     |   | - - ทุ   | - - ช   | - - ลทุ  | - ด - ร  | - - ด    | - ทุ - ร | - - -   | รม - ช    | 16 [48]  |
|     |   | ลช       | ร       | ช        | ล        | ทุ       | ล        | ทุ      | ด         | ช        |
| 1.2 |   | - - - ม  | - ร -   | ช ช -    | ล ล - ทุ | - ร - ม  | - ร -    | ทุ ทุ - | ล ล - ช   | 17 [49]  |
|     |   | ทุ       | ล ช     | ล        | ทุ       | ร ม      | ร ทุ     | ล       | ช         |          |
|     |   | - - มฬ   | - ล -   | - ฬ - ม  | - -      | - - ม    | - ร -    | - ม - ร | - - - ม   | 18 [50*] |
|     |   | ร        | ม       |          | ร ทุ     | รล       | ทุ       | ล       | ทุ        |          |

|       |         |         |         |         |         |         |       |         |       |
|-------|---------|---------|---------|---------|---------|---------|-------|---------|-------|
|       | - - ฟ   | - ม -   | - ร - ร | - - - ช | - ล ล   | - ท -   | ช ช - | ล ล - ท | 19    |
|       | มร      | ร       | ล       | ช       | ล       | ท ช     | ล     | ท       |       |
|       | - - ลท  | - ร - ม | - ม - ม | - ร - ท | - ร - ม | - ร -   | ท ท - | ล ล - ช | 20    |
|       | ช       | ร ม     | ช ม     | ร ท     | ร ม     | ร ท     | ล     | ช       |       |
| 2.2   | - ม -   | ร ร -   | ม ม -   | ช ช - ล | - ช - ล | - ท -   | ด -   | ร -     | 21    |
|       | ม ร     | ม       | ช       | ล       | ช ล     | ท ค     | ร ค   | ท ล     |       |
|       | - - ร   | - ม ฟ   | - ท     | ช ฟ     | - - ด   | - ท - ร | - - - | ร -     | 22    |
|       | ล       | ร       | ล ฟ     | ม ร     | ทล      | ท       | ด     | ช       |       |
|       | - - ร   | - ช - ล | - ท - ล | - ช - ม | - ม -   | ม ร -   | ม -   | ช ช -   | 23    |
|       | ด       | ช ล     | ท ล     | ช ท     | ร ท     | ล ท     | ล ช   | ล       |       |
|       | - ท - ล | - ช - ม | - - ร   | - ช - ล | - - - ร | - - ด   | - - - | ท -     | 24    |
|       | ท ล     | ช ท     | ด       | ช ล     | ล       | ทล      | ฟ     | ท       |       |
| 3.2   | - ท -   | ล ล -   | ท ท -   | ร ร -   | ม -     | - -     | ม -   | ร -     | 25    |
|       | ฟ ม     | ฟ       | ร       | ม       | ร       | ม       | ร     | ม       |       |
|       | - - ด   | - ท - ร | - - ร   | - -     | ม -     | - ล -   | - ล - | -       | 26    |
|       | ทล      | ล       | ร       | ล ท     | ล ฟ     | ม       | ร     | ร       |       |
|       | - ล ล   | - ท -   | - ล -   | - ท -   | - -     | -       | -     | -       | 27    |
|       | ล       | ท ช     | ล ท     | ด ร     | ทล      | ม       | ล     | ร       |       |
|       | - -     | -       | -       | -       | -       | -       | -     | -       | 28    |
|       | ร       | ล ท     | ร ท     | ล ฟ     | ล ท     | ล ฟ     | ม     | ร       |       |
| 4.2   | - ท -   | ล ล -   | ท ท -   | ร ร -   | ม -     | - -     | ม -   | ร -     | 29    |
|       | ฟ ม     | ฟ       | ร       | ม       | ร       | ม       | ร     | ม       |       |
|       | - ร -   | -       | -       | -       | -       | -       | -     | -       | 30    |
|       | ร ท     | ล ช     | ล       | ท       | ล       | ทล      | ท     | ด       |       |
|       | - ร -   | -       | -       | -       | -       | -       | -     | -       | 31    |
|       | ร ม     | ร ท     | ล       | ช       | ล ช     | ท       | ล ท   | ล       |       |
|       | - ม -   | ม ร -   | ม -     | ช ช -   | -       | -       | -     | -       | 32 :) |
|       | ร ท     | ล ท     | ล ช     | ล       | ร ท     | ล ฟ     | ม     | ร       |       |
| *Coda |         |         |         |         |         |         |       |         |       |
|       | - -     | ท -     | ร -     | -       | -       | -       | -     | -       | 33    |
|       | ท       | ร       | ม       | ร       | ท ล     | ท ร     | ท ล   | ช       |       |
|       | - ฟ -   | -       | -       | -       | -       | -       | -     | -       | 34    |
|       | ร ท     | ล       | ด       | ท ล     | ช ท     | ด       | ช ล   | ล       |       |
|       | - ร -   | -       | -       | -       | -       | -       | -     | -       | 35    |
|       | ร ม     | ร ท     | ล       | ช       | ล ช     | ท       | ล ท   | ล       |       |
|       | - ม -   | ร ร -   | ม ม -   | ช ช -   | -       | -       | -     | -       | 36 // |
|       | ม ร     | ม       | ช       | ล       | ร ท     | ล ฟ     | ม     | ร       |       |

# Sadhukarn

Intro.

Luang Bamrung Chit Charoen (TB)

|     |   |          |         |         |         |         |         |         |           |          |
|-----|---|----------|---------|---------|---------|---------|---------|---------|-----------|----------|
|     | R | - - - ร  | - - - ม | - - - ม | - ช - ล | - ล - ล | - ล -   | ล ล -   | ช ช - ร   | 0        |
|     | F | ล        | ทุ      | ม       | ช ล     | ร ม     | ร ล     | ช       | ล         |          |
| 1.1 |   | - - - ทุ | - ล -   | ร ร -   | ม ม - พ | - ล - ท | - ล -   | พ พ -   | ม ม - ร   | 1 [33]   |
|     |   | พ        | ม ร     | ม       | พ       | ล ท     | ล พ     | ม       | ล         |          |
|     |   | - พ - ม  | - ร - - | ด - - - | ร ม -   | - ล ล   | - ท - ล | - ช - ม | - ช - ล   | 2 [34]   |
|     |   | ล        | ทุ      | ทุ      | ด       | ล       | ทุ ล    | ช ทุ    | ช ล       |          |
|     |   | - ร - ม  | - ร -   | ท ท -   | ล ล - ช | - ล ท   | - ร - ม | - ร - ล | - ท - ล   | 3 [35]   |
|     |   | ร ม      | ร ทุ    | ล       | ช       | ช       | ร ม     | ร ล     | ทุ ล      |          |
|     |   | - ม -    | ม ร - ม | - ล -   | ช ช - ล | - ท - ร | - ท -   | ล ล -   | ช ช - ม   | 4 [36]   |
|     |   | ร ทุ     | ล ทุ    | ล ช     | ล       | ทุ ร    | ทุ ล    | ช       | ทุ        |          |
| 2.1 |   | - พ      | - ม -   | - ร - ร | - ท ท   | - ช - - | ล ท - ร | - ม - ร | - ท - ล   | 5 [37]   |
|     |   | ม ร      | ร       |         | ทุ      | ร       | ช ร     | ม ร     | ทุ ล      |          |
|     |   | - ท - ร  | - ท -   | ล ล -   | ช ช - ม | - - -   | ร ม -   | - ล -   | ช ช - ล   | 6 [38]   |
|     |   | ทุ ร     | ทุ ล    | ช       | ทุ      | ล ทุ    | ด       | ล ช     | ล         |          |
|     |   | - ท ล ล  | - ล ล   | - ร - ช | - - ล ท | - ร - ม | - ร -   | ท ท -   | ล ล - ช   | 7 [39]   |
|     |   | ร ล      | ล ช     | ทุ      | ร ม     | ร ทุ    | ล       | ช       |           |          |
|     |   | - - พ    | - ม -   | - ร - ร | - ช ช   | - ล ล   | - ท -   | ช ช -   | ล ล - ท   | 8 [40]   |
|     |   | ม ร      | ร       | ล       | ช       | ล       | ทุ ช    | ล       | ทุ        |          |
| 3.1 |   | - ท -    | ล ล -   | ท ท -   | ร ร - ม | - - ม พ | - ล - - | - ล - - | พ - ท     | 9 [41]   |
|     |   | ทุ ล     | ทุ      | ร       | ม       | ร       | ม       | ร       | ม ร       |          |
|     |   | - ร - ม  | - ร -   | ท ท -   | ล ล - ช | - - ล ท | - ร - ม | - ร - ล | - ท - ล   | 10 [42]  |
|     |   | ร ม      | ร ทุ    | ล       | ช       | ช       | ร ม     | ร ล     | ทุ ล      |          |
|     |   | - ม -    | ม ร - ม | - ล -   | ช ช - ล | - ท - ร | - ท -   | ล ล -   | ช ช - ม   | 11 [43]  |
|     |   | ร ทุ     | ล ทุ    | ล ช     | ล       | ทุ ร    | ทุ ล    | ช       | ทุ        |          |
|     |   | - พ - ม  | - ร - - | ด - - - | ร ม -   | - ล ล   | - ท - ล | - ช - ม | - ช - ล   | 12 [44]  |
|     |   | ล        | ทุ      | ทุ      | ด       | ล       | ทุ ล    | ช ทุ    | ช ล       |          |
| 4.1 |   | - ร - ม  | - ร -   | ท ท -   | ล ล - ช | - - ล ท | - ร - ม | - ร - ล | - ท - ล   | 13 [45]  |
|     |   | ร ม      | ร ทุ    | ล       | ช       | ช       | ร ม     | ร ล     | ทุ ล      |          |
|     |   | - ม -    | ม ร - ม | - ล -   | ช ช - ล | - ท - ร | - ท -   | ล ล -   | ช ช - ม   | 14 [46]  |
|     |   | ร ทุ     | ล ทุ    | ล ช     | ล       | ทุ ร    | ทุ ล    | ช       | ทุ        |          |
|     |   | - ล ล    | - ล ล   | - ล -   | ช ช - ล | - ท ท   | - ล -   | พ พ -   | ม ม - ร   | 15 [47]  |
|     |   | ล        | ล       | ล ช     | ล       | ทุ      | ล พ     | ม       | ล         |          |
|     |   | - ล ล    | - ท - ช | - ล - ท | - ล - ร | - ม ม   | - ร -   | ท ท -   | - ล ล - ช | 16 [48]  |
|     |   | ล        | ทุ ช    | ล ทุ    | ล       | ร       | ม       | ร ทุ    | ล         |          |
| 1.2 |   | - ล ช ช  | - ช ช   | - ร - ช | - - ล ท | - ร - ม | - ร -   | ท ท -   | ล ล - ช   | 17 [49]  |
|     |   | ล        | ช       | ล ช     | ทุ      | ร ม     | ร ทุ    | ล       | ช         |          |
|     |   | - - ม พ  | - ล -   | - ล - - | พ -     | - ท -   | ล ล -   | ท ท -   | ร ร - ม   | 18 [50*] |
|     |   | ร        | ม       | ร       | ม ร     | ทุ      | ม       | ร       | ม         |          |

2.2

|   |     |   |       |   |     |         |   |     |   |     |       |       |   |
|---|-----|---|-------|---|-----|---------|---|-----|---|-----|-------|-------|---|
| - | ช ช | - | ล - ร | - | - - | ริม - ช | - | ล ล | - | ท - | ช ช - | ล ล - | ท |
| ช |     |   | ล     | ท |     | ด       | ช | ล   |   | ท   | ช     | ล     | ท |

19

|   |   |    |   |     |   |   |     |   |   |     |   |   |     |   |   |     |   |     |       |   |
|---|---|----|---|-----|---|---|-----|---|---|-----|---|---|-----|---|---|-----|---|-----|-------|---|
| - | - | ลท | - | ร - | ม | - | ม - | ม | - | ร - | ท | - | ร - | ม | - | ร - | ท | ท - | ล ล - | ช |
| ช |   |    |   | ร   | ม | ช | ม   | ร | ท | ร   | ม | ร | ท   |   |   |     |   | ล   |       | ช |

20

|   |     |       |       |       |   |   |     |   |   |     |   |   |     |   |   |     |   |
|---|-----|-------|-------|-------|---|---|-----|---|---|-----|---|---|-----|---|---|-----|---|
| - | ม - | ร ร - | ม ม - | ช ช - | ล | - | ช - | ล | - | ท - | ด | - | ร - | ด | - | ท - | ล |
| ท | ล   |       | ท     | ช     |   | ล | ช   | ล | ท | ด   | ร | ด | ท   | ล |   |     |   |

21

|   |   |   |   |   |    |    |     |   |   |   |   |   |   |   |   |     |   |   |   |       |   |
|---|---|---|---|---|----|----|-----|---|---|---|---|---|---|---|---|-----|---|---|---|-------|---|
| - | - | ร | - | - | มฟ | -  | ล - | ล | - | - | ฟ | - | - | ด | - | ท - | ร | - | - | ริม - | ช |
| ล |   |   | ร |   | ฟ  | มร |     |   | ท | ล |   |   | ท |   | ด | ช   |   |   |   |       | ช |

22

|   |   |     |   |     |   |   |     |   |   |     |   |   |     |       |       |       |   |
|---|---|-----|---|-----|---|---|-----|---|---|-----|---|---|-----|-------|-------|-------|---|
| - | - | ริม | - | ช - | ล | - | ท - | ล | - | ช - | ม | - | ม - | ร ร - | ม ม - | ช ช - | ล |
| ด | ช | ล   | ท | ล   | ช | ท | ท   | ล |   |     |   | ร | ร   | ม     | ช     | ล     |   |

23

|   |     |   |   |     |   |   |   |     |   |     |   |   |   |   |   |   |   |   |   |   |   |   |   |   |
|---|-----|---|---|-----|---|---|---|-----|---|-----|---|---|---|---|---|---|---|---|---|---|---|---|---|---|
| - | ท - | ล | - | ช - | ม | - | - | ริม | - | ช - | ล | - | - | - | ร | - | - | ด | - | - | ท | - | ท | ท |
| ท | ล   | ช | ท | ด   | ช | ล |   |     | ล | ท   |   |   |   |   |   |   |   | ท |   |   | ฟ |   | ท |   |

24

3.2

|   |     |   |     |   |     |       |   |   |   |    |   |     |   |     |   |   |   |
|---|-----|---|-----|---|-----|-------|---|---|---|----|---|-----|---|-----|---|---|---|
| - | ท - | ล | ล - | ท | ท - | ร ร - | ม | - | - | มฟ | - | ล - | - | ล - | - | ฟ | - |
| ฟ | ม   |   | ฟ   | ร | ม   | ร     |   | ม | ร |    | ม | ร   |   | ม   | ร | ม | ท |

25

|   |   |   |   |   |   |   |   |   |   |   |    |   |     |   |   |     |   |     |       |   |
|---|---|---|---|---|---|---|---|---|---|---|----|---|-----|---|---|-----|---|-----|-------|---|
| - | - | ด | - | - | ฟ | - | - | ร | - | - | มฟ | - | ล - | ท | - | ล - | ฟ | ฟ - | ม ม - | ร |
|   |   | ท |   |   | ม | ล |   | ร | ล | ท | ล  | ฟ |     | ม |   | ล   |   |     |       | ล |

26

|   |     |   |     |   |   |     |   |   |     |   |   |   |   |   |   |   |   |   |   |   |   |    |
|---|-----|---|-----|---|---|-----|---|---|-----|---|---|---|---|---|---|---|---|---|---|---|---|----|
| - | ล ล | - | ท - | ช | - | ล - | ท | - | ด - | ร | - | - | ด | - | - | ฟ | - | - | ร | - | - | มฟ |
| ล | ท   | ช | ล   | ท | ด | ร   |   |   | ท   |   |   |   | ม |   | ล |   |   | ร |   |   |   | ร  |

27

|   |   |    |   |     |   |   |     |   |   |     |   |   |     |   |   |     |   |     |       |   |
|---|---|----|---|-----|---|---|-----|---|---|-----|---|---|-----|---|---|-----|---|-----|-------|---|
| - | - | มฟ | - | ล - | ท | - | ร - | ท | - | ล - | ฟ | - | ล - | ท | - | ล - | ฟ | ฟ - | ม ม - | ร |
| ร | ล | ท  | ร | ท   | ล | ฟ | ล   | ท | ล | ฟ   |   | ม |     | ร |   |     |   |     |       | ร |

28

4.2

|   |     |   |     |   |     |       |   |   |   |    |   |     |   |     |   |   |   |   |
|---|-----|---|-----|---|-----|-------|---|---|---|----|---|-----|---|-----|---|---|---|---|
| - | ท - | ล | ล - | ท | ท - | ร ร - | ม | - | - | มฟ | - | ล - | - | ล - | - | ฟ | - | ท |
| ฟ | ม   |   | ฟ   | ร | ม   | ร     |   | ม | ร |    | ม | ร   |   | ม   | ร | ม | ท |   |

29

|   |     |   |   |     |       |       |   |   |     |   |   |     |   |   |   |   |   |     |
|---|-----|---|---|-----|-------|-------|---|---|-----|---|---|-----|---|---|---|---|---|-----|
| - | ร - | ท | - | ล - | ช ช - | ล ล - | ท | - | ฟ - | ม | - | ร - | - | ด | - | - | - | ริม |
| ร | ท   | ล | ช | ล   | ท     |       | ท |   | ล   |   | ล |     | ท |   |   |   |   | ด   |

30

|   |     |   |   |   |     |   |     |   |   |     |   |   |   |    |   |     |   |   |     |   |   |     |   |
|---|-----|---|---|---|-----|---|-----|---|---|-----|---|---|---|----|---|-----|---|---|-----|---|---|-----|---|
| - | ร - | ช | - | - | ล ท | - | ร - | ท | - | ล - | ช | - | - | ลท | - | ร - | ม | - | ร - | ด | - | ท - | ล |
| ล | ช   |   | ท | ร | ท   | ล | ช   | ช | ร | ม   | ร | ด | ท | ล  |   |     |   |   |     |   |   |     |   |

31

|   |     |       |   |   |     |       |   |   |     |   |   |     |   |     |       |   |
|---|-----|-------|---|---|-----|-------|---|---|-----|---|---|-----|---|-----|-------|---|
| - | ม - | ม ร - | ม | - | ล - | ช ช - | ล | - | ร - | ท | - | ล - | ฟ | ฟ - | ม ม - | ร |
| ร | ท   | ล     | ท | ล | ช   | ล     | ร | ท | ล   | ฟ |   | ม   |   | ร   |       |   |

32

\*Coda

|   |     |   |     |   |   |     |   |   |     |   |   |     |   |   |     |   |     |       |   |
|---|-----|---|-----|---|---|-----|---|---|-----|---|---|-----|---|---|-----|---|-----|-------|---|
| - | ท - | ท | ท - | ร | - | ม - | ร | - | ท - | ล | - | ท - | ร | - | ท - | ล | ล - | ช ช - | ม |
| ท | ท   |   | ร   | ม | ร | ท   | ล | ท | ร   | ท | ล |     | ช |   |     |   |     |       | ท |

51

|   |     |   |   |     |   |   |   |   |   |     |   |     |   |     |   |   |     |   |   |     |   |
|---|-----|---|---|-----|---|---|---|---|---|-----|---|-----|---|-----|---|---|-----|---|---|-----|---|
| - | ฟ - | ม | - | ร - | - | ด | - | - | - | ริม | - | ล ล | - | ท - | ล | - | ช - | ม | - | ช - | ล |
|   | ล   |   | ท |     |   | ด |   |   | ล |     | ท | ล   | ช | ท   | ช | ล |     |   |   |     |   |

52

|   |     |   |   |     |   |     |   |     |   |   |   |    |   |     |   |   |     |   |   |     |   |
|---|-----|---|---|-----|---|-----|---|-----|---|---|---|----|---|-----|---|---|-----|---|---|-----|---|
| - | ร - | ม | - | ร - | ท | ท - | ล | ล - | ช | - | - | ลท | - | ร - | ม | - | ร - | ด | - | ท - | ล |
| ร | ม   | ร | ท |     | ล | ช   | ช | ร   | ม | ร | ด | ท  | ล |     |   |   |     |   |   |     |   |

53

|   |     |       |   |   |     |       |   |   |     |   |   |     |   |   |   |   |   |   |   |   |
|---|-----|-------|---|---|-----|-------|---|---|-----|---|---|-----|---|---|---|---|---|---|---|---|
| - | ม - | ม ร - | ม | - | ล - | ช ช - | ล | - | ร - | ท | - | ล - | ฟ | - | - | ม | - | - | - | ร |
| ร | ท   | ล     | ท | ล | ช   | ล     | ร | ท | ล   | ฟ |   | ม   |   |   |   |   |   |   |   | ร |

54

# Sadhukarn

Intro.

Samran Kerdphol (TS1)

|     |         |         |         |         |         |         |         |         |          |
|-----|---------|---------|---------|---------|---------|---------|---------|---------|----------|
| R   | - - - ร | - - - ม | - - - ม | - ช - ล | - - - ล | - ล -   | ล ล -   | ช ช - ร | 0        |
| F   | ล       | ท       | ม       | ช ล     | ม       | ร ล     | ช       | ล       |          |
| 1.1 | - - - ท | - ล -   | ร ร -   | ม ม - พ | - ล - ท | - ล -   | พ พ -   | ม ม - ร | 1 [33]   |
|     | พ       | ม ร     | ม       | พ       | ล ท     | ล พ     | ม       | ล       |          |
|     | - พ - ม | - -     | - - -   | - ร - ม | - ช ช   | - ล - ท | - ล -   | ท ท - ล | 2 [34]   |
|     |         | ร ท     | ล ท     | ล ท     | ช       | ล ท     | ล ท     | ล       |          |
|     | - - - ม | - ร -   | ท ท -   | ล ล - ช | - ร - ช | - ล - ท | - ล -   | ท ท - ล | 3 [35]   |
|     | ม       | ร ท     | ล       | ช       | ล ช     | ล ท     | ล ท     | ล       |          |
|     | - ม -   | ร ร -   | ม ม -   | ช ช - ล | - ท ท   | - ท -   | ล ล -   | ช ช - ม | 4 [36]   |
|     | ม ร     | ม       | ช       | ล       | ท       | ร ล     | ช       | ท       |          |
| 2.1 | - - - ร | - ม -   | ช ช -   | ล ล - ท | - - ลท  | - ร - ม | - ร - ล | - ท - ล | 5 [37]   |
|     | ล       | ท ช     | ล       | ท       | ช       | ร ม     | ร ล     | ท ล     |          |
|     | - ท - ร | - ท -   | ล ล -   | ช ช - ม | - -     | - - รม  | - ม ม   | ช - ล   | 6 [38]   |
|     | ท ร     | ท ล     | ช       | ท       | ล ท     | ล       | ม       | ช ล     |          |
|     | - - - ร | - ม -   | ช ช -   | ล ล - ท | - ร - ม | - ร -   | ท ท -   | ล ล - ช | 7 [39]   |
|     | ล       | ท ช     | ล       | ท       | ร ม     | ร ท     | ล       | ช       |          |
|     | - - พ   | - ม -   | - ร - ร | - - - ช | - ล ล - | - ท -   | ช ช -   | ล ล - ท | 8 [40]   |
|     | มร      | ร       | ล       | ช       | ล       | ท ช     | ล       | ท       |          |
| 3.1 | - ท -   | ล ล -   | ท ท -   | ร ร - ม | - ม - ม | - ม -   | ม ม -   | ร ร - ท | 9 [41]   |
|     | ท ล     | ท       | ร       | ม       | ช ล     | ช ม     | ร       | ท       |          |
|     | - ร - ม | - ร -   | ท ท -   | ล ล - ช | - ร - ช | - ล - ท | - ล -   | ท ท - ล | 10 [42]  |
|     | ร ม     | ร ท     | ล       | ช       | ล ช     | ล ท     | ล ท     | ล       |          |
|     | - ม -   | ร ร -   | ม ม -   | ช ช - ล | - ท ท   | - ท -   | ล ล -   | ช ช - ม | 11 [43]  |
|     | ม ร     | ม       | ช       | ล       | ท       | ร ล     | ช       | ท       |          |
|     | - ล     | ช ม     | - - -   | - ร - ม | - ช ช   | - ล - ท | - ล -   | ท ท - ล | 12 [44]  |
|     | ช ม     | ร ท     | ล ท     | ล ท     | ช       | ล ท     | ล ท     | ล       |          |
| 4.1 | - - - ม | - ร -   | ท ท -   | ล ล - ช | - ร - ช | - ล - ท | - ล -   | ท ท - ล | 13 [45]  |
|     | ม       | ร ท     | ล       | ช       | ล ช     | ล ท     | ล ท     | ล       |          |
|     | - ม -   | ร ร -   | ม ม -   | ช ช - ล | - ท ท   | - ท -   | ล ล -   | ช ช - ม | 14 [46]  |
|     | ม ร     | ม       | ช       | ล       | ท       | ร ล     | ช       | ท       |          |
|     | - - ช ม | - ช ช   | - - ช ล | - ช ช   | - ล ล   | - ท - ล | - ช - พ | - ม - ร | 15 [47]  |
|     | ท       | ช       | ล       | ช       | ล       | ท ล     | ช พ     | ม ร     |          |
|     | - - ช   | - - ลท  | - -     | - ล - ร | - -     | - ม - ร | - - -   | ร - ช   | 16 [48]  |
|     | ร       | ช       | ล ท     | ล       | ล ท     | ล       | ท       | ล       |          |
| 1.2 | - - - ร | - ม -   | ช ช -   | ล ล - ท | - ร - ม | - ร -   | ท ท -   | ล ล - ช | 17 [49]  |
|     | ล       | ท ช     | ล       | ท       | ร ม     | ร ท     | ล       | ช       |          |
|     | - - มพ  | - ล -   | - ล - - | พ -     | - ท -   | ล ล -   | ท ท -   | ร ร - ม | 18 [50*] |
|     | ร       | ม       | ร       | มร      | ท       | ท       | ม       | ร       |          |

2.2

|       |       |         |         |       |       |       |         |
|-------|-------|---------|---------|-------|-------|-------|---------|
| - - พ | - ม - | - ร - ร | - - - ช | - ล ล | - ท - | ช ช - | ล ล - ท |
| มร    | ร     | ล       | ช       | ล     | ท     | ช     | ล       |

19

|        |         |         |         |         |       |       |         |
|--------|---------|---------|---------|---------|-------|-------|---------|
| - - ลท | - ร - ม | - ม - ม | - ร - ท | - ร - ม | - ร - | ท ท - | ล ล - ช |
| ช      | ร       | ม       | ช       | ม       | ร     | ท     | ล       |

20

|         |       |         |       |       |       |       |         |
|---------|-------|---------|-------|-------|-------|-------|---------|
| - - ล ช | - ล ล | - - ล ท | - ล ล | - ร - | ร ร - | ด ด - | ท ท - ล |
| ช       | ล     | ท       | ล     | ร     | ร     | ด     | ท       |

21

|       |        |         |       |   |         |       |         |
|-------|--------|---------|-------|---|---------|-------|---------|
| - - ร | - - มพ | - ล - ล | - - พ | - | - ม - ร | - - - | รรม - ช |
| ล     | ร      | พ       | มร    | ล | ท       | ล     | ท       |

22

|       |       |       |       |       |       |       |         |
|-------|-------|-------|-------|-------|-------|-------|---------|
| - ท - | ท ท - | ล ล - | ช ช - | พ พ - | ม ม - | พ พ - | ช ช - ล |
| ท     | ท     | ล     | ช     | พ     | ม     | พ     | ช       |

23

|         |       |     |         |         |       |       |         |
|---------|-------|-----|---------|---------|-------|-------|---------|
| - ร - ม | - ร - | ท ท | ล ล - ช | - ร - ร | - - ท | - - ช | - ล - ท |
| ร       | ม     | ร   | ท       | ล       | ช     | ท     | ล       |

24

3.2

|       |       |       |         |       |       |       |         |
|-------|-------|-------|---------|-------|-------|-------|---------|
| - ท - | ล ล - | ท ท - | ร ร - ม | - พ พ | - พ - | ม ม - | ร ร - ท |
| ท     | ล     | ท     | ร       | พ     | พ     | ม     | ร       |

25

|         |       |       |         |         |       |       |         |
|---------|-------|-------|---------|---------|-------|-------|---------|
| - ล - พ | - ม - | ร ร - | ม ม - พ | - ล - ท | - ล - | พ พ - | ม ม - ร |
| ล       | พ     | ม     | พ       | ล       | ท     | พ     | ร       |

26

|       |         |         |         |       |         |         |         |
|-------|---------|---------|---------|-------|---------|---------|---------|
| - ล ล | - ท - ช | - ล - ท | - ด - ร | - ท - | ล ล - ร | - ด - ท | - ล - พ |
| ล     | ท       | ล       | ด       | ท     | ล       | ด       | ล       |

27

|        |         |         |         |         |       |       |         |
|--------|---------|---------|---------|---------|-------|-------|---------|
| - - มพ | - ล - ท | - ร - ท | - ล - พ | - ล - ท | - ล - | พ พ - | ม ม - ร |
| ร      | ล       | ท       | ล       | พ       | ล     | พ     | ม       |

28

4.2

|         |     |       |         |        |       |         |     |
|---------|-----|-------|---------|--------|-------|---------|-----|
| - พ - ม | - - | - - - | - ร - ม | - - มพ | - ล - | - ล - - | พ - |
| พ       | ร   | ล     | ล       | ร      | ล     | ร       | ม   |

29

|         |       |       |         |         |     |       |         |
|---------|-------|-------|---------|---------|-----|-------|---------|
| - ร - ท | - ล - | ช ช - | ล ล - ท | - พ - ม | - - | - - - | - ร - ม |
| ร       | ท     | ล     | ล       | พ       | ร   | ล     | ล       |

30

|         |       |       |         |         |         |       |         |
|---------|-------|-------|---------|---------|---------|-------|---------|
| - - - ม | - ร - | ท ท - | ล ล - ช | - ร - ช | - ล - ท | - ล - | ท ท - ล |
| ม       | ร     | ท     | ล       | ช       | ล       | ท     | ล       |

31

|       |       |       |         |         |         |         |         |
|-------|-------|-------|---------|---------|---------|---------|---------|
| - ม - | ร ร - | ม ม - | ช ช - ล | - - รรม | - ช - ล | - ช - พ | - ม - ร |
| ม     | ร     | ม     | ช       | ด       | ช       | พ       | ร       |

32

\*Coda

|       |         |         |         |         |       |       |         |
|-------|---------|---------|---------|---------|-------|-------|---------|
| - ท - | ท ท - ร | - ม - ร | - ท - ล | - ท - ร | - ท - | ล ล - | ช ช - ม |
| ท     | ท       | ร       | ล       | ร       | ล     | ช     | ม       |

51

|     |     |       |         |       |         |       |         |
|-----|-----|-------|---------|-------|---------|-------|---------|
| - ล | ช ม | - - - | - ร - ม | - ช ช | - ล - ท | - ล - | ท ท - ล |
| ล   | ช   | ร     | ล       | ช     | ล       | ล     | ล       |

52

|         |       |       |         |         |         |       |         |
|---------|-------|-------|---------|---------|---------|-------|---------|
| - - - ม | - ร - | ท ท - | ล ล - ช | - ร - ช | - ล - ท | - ล - | ท ท - ล |
| ม       | ร     | ท     | ล       | ช       | ล       | ท     | ล       |

53

|       |       |       |         |         |         |         |         |
|-------|-------|-------|---------|---------|---------|---------|---------|
| - ม - | ร ร - | ม ม - | ช ช - ล | - - รรม | - ช - ล | - ช - พ | - ม - ร |
| ม     | ร     | ม     | ช       | ด       | ช       | พ       | ร       |

54

# Sadhukarn

Intro.

Phinij Chaisuwan (TP1)

|     |   |          |         |         |         |          |         |         |         |          |
|-----|---|----------|---------|---------|---------|----------|---------|---------|---------|----------|
|     | R | - - - ร  | - - - ม | - - - ม | - ช - ล | - - -    | - ล - ล | - - - ช | - - - ร | 0        |
|     | F | ล        | ทุ      | ม       | ช ล     | ล        | ล       | ช       | ล       |          |
| 1.1 |   | - - - ทุ | - ล -   | ร ร -   | ม ม - ฬ | - ล - ทุ | - ล -   | ฬ ฬ -   | ม ม - ร | 1 [33]   |
|     |   | ฬ        | ม ร     | ม       | ฬ       | ล ทุ     | ล ฬ     | ม       | ร       |          |
|     |   | - ฬ - ม  | - ร - - | ด - -   | - - รม  | - ล ล    | - ท - ล | - ช - ม | - ช - ล | 2 [34]   |
|     |   | ล        | ทุ      | ทุ      | ด       | ล        | ทุ ล    | ช ทุ    | ช ล     |          |
|     |   | - ร - ม  | - ร -   | ท ท -   | ล ล - ช | - - ลท   | - ร - ม | - ร - ด | - ท - ล | 3 [35]   |
|     |   | ร ม      | ร ทุ    | ล       | ช       | ช        | ร ม     | ร ด     | ทุ ล    |          |
|     |   | - -      | - ร ม   | - ม ม   | - ช - ล | - ท - ร  | - ท -   | ล ล -   | ช ช - ม | 4 [36]   |
|     |   | ล ทุ     | ด       | ม       | ช ล     | ทุ ร     | ทุ ล    | ช       | ทุ      |          |
| 2.1 |   | - - - ล  | - ท ท   | - - - ร | - ท ท   | - ช - -  | ลท - ร  | - ม - ร | - ท - ล | 5 [37]   |
|     |   | ล        | ทุ      | ร       | ทุ      | ร        | ช ร     | ม ร     | ทุ ล    |          |
|     |   | - ท - ร  | - ท -   | ล ล -   | ช ช - ม | - ม -    | ร ร -   | ม ม -   | ช ช - ล | 6 [38]   |
|     |   | ทุ ร     | ทุ ล    | ช       | ทุ      | ทุ ล     | ทุ      | ช       | ล       |          |
|     |   | - - -    | - ล - ล | - ช ช   | - ล - ท | - ร - ม  | - ร -   | ท ท -   | ล ล - ช | 7 [39]   |
|     |   | ล        | ล       | ช       | ล ทุ    | ร ม      | ร ทุ    | ล       | ช       |          |
|     |   | - - ฬ    | - ม -   | - ร - ร | - - - ช | - ล ล    | - ท - ช | - - ล ท | - ล - ท | 8 [40]   |
|     |   | มร       | ร       | ล       | ช       | ล        | ทุ ช    | ทุ      | ล ทุ    |          |
| 3.1 |   | - ท -    | ล ล -   | ท ท -   | ร ร - ม | - - มฬ   | - ล - - | - ล - - | ฬ - ท   | 9 [41]   |
|     |   | ทุ ล     | ทุ      | ร       | ม       | ร        | ม       | ร       | มร      |          |
|     |   | - ร - ม  | - ร -   | ท ท -   | ล ล - ช | - - ลท   | - ร - ม | - ร - ด | - ท - ล | 10 [42]  |
|     |   | ร ม      | ร ทุ    | ล       | ช       | ช        | ร ม     | ร ด     | ทุ ล    |          |
|     |   | - -      | - ร ม   | - ม ม   | - ช - ล | - ท - ร  | - ท -   | ล ล -   | ช ช - ม | 11 [43]  |
|     |   | ล ทุ     | ด       | ม       | ช ล     | ทุ ร     | ทุ ล    | ช       | ทุ      |          |
|     |   | - ฬ - ม  | - ร - - | ด - -   | - - รม  | - ล ล    | - ท - ล | - ช - ม | - ช - ล | 12 [44]  |
|     |   | ล        | ทุ      | ทุ      | ด       | ล        | ทุ ล    | ช ทุ    | ช ล     |          |
| 4.1 |   | - ร - ม  | - ร -   | ท ท -   | ล ล - ช | - - ลท   | - ร - ม | - ร - ด | - ท - ล | 13 [45]  |
|     |   | ร ม      | ร ทุ    | ล       | ช       | ช        | ร ม     | ร ด     | ทุ ล    |          |
|     |   | - -      | - - รม  | - ม ม   | - ช - ล | - ท - ร  | - ท -   | ล ล -   | ช ช - ม | 14 [46]  |
|     |   | ล ทุ     | ด       | ม       | ช ล     | ทุ ร     | ทุ ล    | ช       | ทุ      |          |
|     |   | - - -    | - ล - ล | - ล -   | ช ช - ล | - ร - ท  | - ล -   | ฬ ฬ -   | ม ม - ร | 15 [47]  |
|     |   | ล        | ล       | ล ช     | ล       | ร ทุ     | ล ฬ     | ม       | ร       |          |
|     |   | - ล ล    | - ท - ช | - ล - ท | - ด - ร | - -      | - ม - ร | - - -   | รม - ช  | 16 [48]  |
|     |   | ล        | ทุ ช    | ล ทุ    | ด ร     | ล ทุ     | ล ทุ    | ทุ      | ด ช     |          |
| 1.2 |   | - ม -    | ร ร -   | ช ช -   | ล ล - ท | - ร - ม  | - ร -   | ท ท -   | ล ล - ช | 17 [49]  |
|     |   | ทุ ล     | ช       | ล       | ทุ      | ร ม      | ร ทุ    | ล       | ช       |          |
|     |   | - - มฬ   | - ล -   | - ล - - | ฬ -     | - ท -    | ล ล -   | ทุ ทุ - | ร ร - ม | 18 [50*] |
|     |   | ร        | ม       | ร       | มร      | ทุ       | ฬ       | ม       | ฬ       |          |



|       |         |         |         |         |         |         |         |         |       |
|-------|---------|---------|---------|---------|---------|---------|---------|---------|-------|
|       | - - ฟ   | - ม -   | - ร - ร | - - - ช | - ล ล   | - ท - ช | - - ล ท | - ล - ท | 19    |
|       | มร      | ร       | ล       | ช       | ล       | ท ช     | ท       | ล ท     |       |
|       | - - ลท  | - ร - ม | - ม - ม | - ร - ท | - ร - ม | - ร -   | ท ท -   | ล ล - ช | 20    |
|       | ช       | ร ม     | ช ม     | ร ท     | ร ม     | ร ท     | ล       | ช       |       |
| 2.2   | - - -   | - ช - ช | - ท -   | - ล - ล | - ช - - | ลท - ร  | - ม - ร | - ท - ล | 21    |
|       | ช       | ช       | ท ล     | ล       | ร       | ช ร     | ม ร     | ท ล     |       |
|       | - - ร   | - - มฟ  | - ล - ล | - - ฟ   | - -     | - ม - ร | - - -   | รรม - ช | 22    |
|       | ล       | ร       | ฟ       | มร      | ล ท     | ล       | ท       | ด ช     |       |
|       | - - รรม | - ช - ล | - ท - ล | - ช - ม | - ม -   | ร ร -   | ม ม -   | ช ช - ล | 23    |
|       | ด       | ช ล     | ท ล     | ช ท     | ท ล     | ท       | ช       | ล       |       |
|       | - ท - ล | - ช - ม | - - รรม | - ช - ล | - - - ร | - - ด   | - - - ท | - - ทท  | 24    |
|       | ท ล     | ช ท     | ด       | ช ล     | ล       | ทล      | ฟ       | ท       |       |
| 3.2   | - ท -   | ล ล -   | ท ท -   | ร ร - ม | - - มฟ  | - ล -   | - ล - - | ฟ -     | 25    |
|       | ท ม     | ฟ       | ร       | ม       | ร       | ม       | ร       | มร      | ท     |
|       | - - ด   | - - ฟ   | - - ร   | - - มฟ  | - ล - ท | - ล -   | ฟ ฟ -   | ม ม - ร | 26    |
|       | ทล      | มร      | ล       | ร       | ล ท     | ล ฟ     | ม       | ร       |       |
|       | - ล ล   | - ท - ช | - ล - ท | - ค - ร | - ท -   | ล ล - ร | - ค - ท | - ล - ฟ | 27    |
|       | ล       | ท ช     | ล ท     | ด ร     | ท ล     | ร       | ด ท     | ล ด     |       |
|       | - ค -   | ค ค -   | ท ท -   | ล ล - ฟ | - ล - ท | - ล -   | ฟ ฟ -   | ม ม - ร | 28    |
|       | ด ด     | ท       | ล       | ด       | ล ท     | ล ฟ     | ม       | ร       |       |
| 4.2   | - ท -   | ล ล -   | ท ท -   | ร ร - ม | - - มฟ  | - ล -   | - ล - - | ฟ - ท   | 29    |
|       | ท ล     | ท       | ร       | ม       | ร       | ม       | ร       | มร      | ท     |
|       | - - -   | - ท - ท | - ช ช   | - ล - ท | - ฟ - ม | - ร - - | ด - -   | - - รรม | 30    |
|       | ท       | ท       | ช       | ล ท     | ล       | ล       | ทล      | ท       | ด     |
|       | - ร - ม | - ร -   | ท ท -   | ล ล - ช | - ค ค   | - ร - ม | - ร - ค | - ท - ล | 31    |
|       | ร ม     | ร ท     | ล       | ช       | ด       | ร ม     | ร ด     | ท ล     |       |
|       | - -     | - - รรม | - ม ม   | - ช - ล | - ร - ท | - ล -   | ฟ ฟ -   | ม ม - ร | 32 :) |
|       | ล ท     | ด       | ม       | ช ล     | ร ท     | ล ฟ     | ม       | ร       |       |
| *Coda |         |         |         |         |         |         |         |         |       |
|       | - ท -   | ท ท - ร | - ม - ร | - ท - ล | - ท - ร | - ท -   | ล ล -   | ช ช - ม | 33    |
|       | ท ท     | ร       | ม ร     | ท ล     | ท ร     | ท ล     | ช       | ท       |       |
|       | - ฟ - ม | - ร - - | ด - -   | - - รรม | - ท - ล | - ช - ม | - - รรม | - ช - ล | 34    |
|       | ล       | ทล      | ท       | ด       | ท ล     | ช ท     | ด       | ช ล     |       |
|       | - ร - ม | - ร -   | ท ท -   | ล ล - ช | - ค ค   | - ร - ม | - ร - ค | - ท - ล | 35    |
|       | ร ม     | ร ท     | ล       | ช       | ด       | ร ม     | ร ด     | ท ล     |       |
|       | - - - ร | - - - ม | - - - ม | - ช - ล | - ร - ท | - ล - ฟ | - - - ม | - - - ร | 36 // |
|       | ล       | ท       | ม       | ช ล     | ร ท     | ล ด     | ท       | ล       |       |

# Sadhukarn

Intro.

Thai music ensemble of Bangkok (TK)

|     |   |          |         |          |           |          |          |          |           |          |
|-----|---|----------|---------|----------|-----------|----------|----------|----------|-----------|----------|
|     | R | - - - รั | - - - ม | - - - ม  | - ช - ล   | - - -    | - ล - ล  | - - - ช  | - - - รั  | 0        |
|     | F | ล        | ทุ      | ม        | ช ล       | ล        | ล        | ช        | ล         |          |
| 1.1 |   | - - - ทุ | - ล -   | รั รั -  | ม ม - ฟ   | - ล - ท  | - ล -    | ฟ ฟ -    | ม ม - รั  | 1 [33]   |
|     |   | ฟ        | ม รั    | ม        | ฟ         | ล ทุ     | ล ทุ     | ม        | รั        |          |
|     |   | - ฟ - ม  | - -     | - - -    | - รั - ม  | - ท - ล  | - ช - ม  | - - รัม  | - ช - ล   | 2 [34]   |
|     |   | รั ทุ    | ล ทุ    | ล ทุ     | ทุ ล      | ช ทุ     | ทุ       | ทุ       | ช ล       |          |
|     |   | - รั - ม | - รั -  | ท ท -    | ล ล - ช   | - - ลท   | - รั - ม | - รั - ค | - ท - ล   | 3 [35]   |
|     |   | ร ม      | ร ทุ    | ล        | ช         | ช        | ร ม      | ร ค      | ทุ ล      |          |
|     |   | - - -    | - ม - ม | - ร ม    | - ช - ล   | - ท - รั | - ท -    | ล ล -    | ช ช - ม   | 4 [36]   |
|     |   | ม        | ทุ      | ทุ       | ช ล       | ทุ ร     | ทุ ล     | ช        | ทุ        |          |
| 2.1 |   | - - - ล  | - ท ท   | - - - รั | - ท ท     | - ช - -  | ลท - รั  | - ม - รั | - ท - ล   | 5 [37]   |
|     |   | ล        | ทุ      | ร        | ทุ        | ร        | ช ร      | ม ร      | ทุ ล      |          |
|     |   | - ท - รั | - ท -   | ล ล -    | ช ช - ม   | - ม -    | รั รั -  | ม ม -    | ช ช - ล   | 6 [38]   |
|     |   | ทุ ร     | ทุ ล    | ช        | ทุ        | ทุ ล     | ทุ       | ช        | ล         |          |
|     |   | - - -    | - ล - ล | - ช ช    | - ล - ท   | - รั - ม | - รั -   | ท ท -    | ล ล - ช   | 7 [39]   |
|     |   | ล        | ล       | ช        | ล ทุ      | ร ม      | ร ทุ     | ล        | ช         |          |
|     |   | - - ฟ    | - ม -   | - ร - ร  | - - - ช   | - ล ล    | - ท - ช  | - - ล ท  | - ล - ท   | 8 [40]   |
|     |   | มร       | รั      | ล        | ช         | ล        | ทุ ช     | ทุ       | ล ทุ      |          |
| 3.1 |   | - ท -    | ล ล -   | ท ท -    | รั รั - ม | - ม - ม  | - ม - -  | ม ม -    | รั รั - ท | 9 [41]   |
|     |   | ทุ ล     | ทุ      | ร        | ม         | ช ล      | ช ม      | ร        | ทุ        |          |
|     |   | - รั - ม | - รั -  | ท ท -    | ล ล - ช   | - - ลท   | - รั - ม | - รั - ค | - ท - ล   | 10 [42]  |
|     |   | ร ม      | ร ทุ    | ล        | ช         | ช        | ร ม      | ร ค      | ทุ ล      |          |
|     |   | - - -    | - ม - ม | - ร ม    | - ช - ล   | - ท - รั | - ท -    | ล ล -    | ช ช - ม   | 11 [43]  |
|     |   | ม        | ทุ      | ทุ       | ช ล       | ทุ ร     | ทุ ล     | ช        | ทุ        |          |
|     |   | - ฟ - ม  | - -     | - - -    | - รั - ม  | - ท - ล  | - ช - ม  | - - รัม  | - ช - ล   | 12 [44]  |
|     |   | ร ทุ     | ล ทุ    | ล ทุ     | ทุ ล      | ช ทุ     | ทุ       | ทุ       | ช ล       |          |
| 4.1 |   | - รั - ม | - รั -  | ท ท -    | ล ล - ช   | - - ลท   | - รั - ม | - รั - ค | - ท - ล   | 13 [45]  |
|     |   | ร ม      | ร ทุ    | ล        | ช         | ช        | ร ม      | ร ค      | ทุ ล      |          |
|     |   | - - -    | - ม - ม | - ร ม    | - ช - ล   | - ท - รั | - ท -    | ล ล -    | ช ช - ม   | 14 [46]  |
|     |   | ม        | ทุ      | ทุ       | ช ล       | ทุ ร     | ทุ ล     | ช        | ทุ        |          |
|     |   | - - -    | - ล - ล | - ฟ ฟ    | - ช - ล   | - - ร    | - ม ฟ    | - ท      | ล ฟ       | 15 [47]  |
|     |   | ล        | ล       | ฟ        | ช ล       | ล        | ร        | ล ฟ      | ม ร       |          |
|     |   | - ล ล    | - ท - ช | - ล - ท  | - ค - รั  | - -      | - ม - ร  | - - -    | รัม - ช   | 16 [48]  |
|     |   | ล        | ทุ ช    | ล ทุ     | ค ร       | ล ทุ     | ล ทุ     | ทุ       | ค ช       |          |
| 1.2 |   | - ม -    | รั รั - | ช ช -    | ล ล - ท   | - รั - ม | - รั -   | ท ท -    | ล ล - ช   | 17 [49]  |
|     |   | ทุ ล     | ช       | ล        | ทุ        | ร ม      | ร ทุ     | ล        | ช         |          |
|     |   | - - มฟ   | - ล -   | - ฟ - ม  | - -       | - ท -    | ล ล -    | ทุ ทุ -  | ร ร - ม   | 18 [50*] |
|     |   | ร        | ม       |          | ร ทุ      | ฟ ม      | ฟ        | ร        | ม         |          |

|     |         |         |         |         |         |         |         |         |       |
|-----|---------|---------|---------|---------|---------|---------|---------|---------|-------|
|     | - - ฟ   | - ม -   | - ร - ร | - - - ช | - ล ล   | - ท - ช | - - ล ท | - ล - ท | 19    |
|     | มร      | ร       | ล       | ช       | ล       | ท ช     | ท       | ล ท     |       |
|     | - - ลท  | - ร - ม | - ม - ม | - ร - ท | - ร - ม | - ร -   | ท ท -   | ล ล - ช | 20    |
|     | ช       | ร ม     | ช ม     | ร ท     | ร ม     | ร ท     | ล       | ช       |       |
| 2.2 | - - -   | - ช - ช | - ท -   | - ล - ล | - ช - - | ลท - ร  | - ม - ร | - ท - ล | 21    |
|     | ช       | ช       | ท ล     | ล       | ร       | ช ร     | ม ร     | ท ล     |       |
|     | - - ร   | - - มฟ  | - ท     | ล ฟ     | - - ด   | - ท - ร | - - -   | ร ม - ช | 22    |
|     | ล       | ร       | ล ฟ     | ม ร     | ทล      | ล       | ท       | ด ช     |       |
|     | - - รม  | - ช - ล | - ท - ล | - ช - ม | - ม -   | ร ร -   | ม ม -   | ช ช - ล | 23    |
|     | ท       | ช ล     | ท ล     | ช ท     | ท ล     | ท       | ช       | ล       |       |
|     | - ร - ท | - ล - ช | - ล -   | ท ท - ล | - - - ร | - - ด   | - - - ท | - - ทท  | 24    |
|     | ร ท     | ล ช     | ล ท     | ล       | ล       | ทล      | ฟ       | ท       |       |
| 3.2 | - ท -   | ล ล -   | ท ท -   | ร ร - ม | - - มฟ  | - ล -   | - ล - - | ฟ -     | 25    |
|     | ท ม     | ฟ       | ร       | ม       | ร       | ม       | ร       | มร      | ท     |
|     | - - ด   | - - ฟ   | - - ร   | - - มฟ  | - ล - ท | - ล -   | ฟ ฟ -   | ม ม - ร | 26    |
|     | ทล      | มร      | ล       | ร       | ล ท     | ล ฟ     | ม       | ร       |       |
|     | - ล ล   | - ท - ช | - ล - ท | - ค - ร | - - ด   | - - ฟ   | - - ร   | - - มฟ  | 27    |
|     | ล       | ท ช     | ล ท     | ด ร     | ทล      | มร      | ล       | ร       |       |
|     | - - มฟ  | - ล - ท | - ร - ท | - ล - ฟ | - ล - ท | - ล -   | ฟ ฟ -   | ม ม - ร | 28    |
|     | ร       | ล ท     | ร ท     | ล ฟ     | ล ท     | ล ฟ     | ม       | ร       |       |
| 4.2 | - ท -   | ล ล -   | ท ท -   | ร ร - ม | - - มฟ  | - ล -   | - ล - - | ฟ - ท   | 29    |
|     | ท ม     | ฟ       | ร       | ม       | ร       | ม       | ร       | มร      | ท     |
|     | - - -   | - ท - ท | - ช ช   | - ล - ท | - ฟ - ม | - -     | - - -   | - ร - ม | 30    |
|     | ท       | ท       | ช       | ล ท     | ร ท     | ล       | ท       | ล ท     |       |
|     | - ร - ม | - ร -   | ท ท -   | ล ล - ช | - - ลท  | - ร - ม | - ร - ค | - ท - ล | 31    |
|     | ร ม     | ร ท     | ล       | ช       | ช       | ร ม     | ร ค     | ท ล     |       |
|     | - - -   | - ม - ม | - ร ม   | - ช - ล | - ร - ท | - ล -   | ฟ ฟ -   | ม ม - ร | 32 :) |
|     | ม       | ท       | ท       | ช ล     | ร ท     | ล ฟ     | ม       | ร       |       |

\*Coda

|  |         |         |         |         |         |         |         |         |       |
|--|---------|---------|---------|---------|---------|---------|---------|---------|-------|
|  | - - ท   | ท ท - ร | - ม - ร | - ท - ล | - ท - ร | - ท -   | ล ล -   | ช ช - ม | 33    |
|  | ท       | ร       | ม ร     | ท ล     | ท ร     | ท ล     | ช       | ท       |       |
|  | - ฟ - ม | - -     | - - -   | - ร - ม | - ท - ล | - ช - ม | - - รม  | - ช - ล | 34    |
|  | ร       | ท       | ล       | ท       | ล       | ช       | ท       | ท       |       |
|  | - ร - ม | - ร -   | ท ท -   | ล ล - ช | - - ลท  | - ร - ม | - ร - ค | - ท - ล | 35    |
|  | ร ม     | ร ท     | ล       | ช       | ช       | ร ม     | ร ค     | ท ล     |       |
|  | - - - ร | - - - ม | - - - ม | - ช - ล | - ร - ท | - ล - ฟ | - - - ม | - - - ร | 36 // |
|  | ล       | ท       | ม       | ช ล     | ร ท     | ล ค     | ท       | ล       |       |

# Sadhukarn

Intro.

Chub Sowat (TC)

|     |   |          |           |          |          |          |          |         |          |          |
|-----|---|----------|-----------|----------|----------|----------|----------|---------|----------|----------|
|     | R | - - - ร  | - - - ม   | - - - ม  | - ช - ล  | - ล - ล  | - ล -    | ล ล -   | ช ช - ร  | 0        |
|     | F | ล        | ทุ        | ม        | ช ล      | ร ม      | ร ล      | ช       | ล        |          |
| 1.1 |   | - - - ทุ | - ล -     | ร ร -    | ม ม - ฬ  | - ล - ทุ | - ล -    | ฬ ฬ -   | ม ม - ร  | 1 [33]   |
|     |   | ฬ        | ม ร       | ม        | ฬ        | ล ทุ     | ล ฬ      | ม       | ล        |          |
|     |   | - ฬ - ม  | - ร - ด   | - -      | - - ร ม  | - ล ล    | - ทุ - ล | - ช - ม | - ช - ล  | 2 [34]   |
|     |   |          | ล         | ทุ ล ทุ  | ด        | ล        | ทุ ล     | ช ทุ    | ช ล      |          |
|     |   | - ร - ม  | - ร -     | ทุ ทุ -  | ล ล - ช  | - ช - -  | ล ทุ - ร | - ม - ร | - ทุ - ล | 3 [35]   |
|     |   | ร ม      | ร ทุ      | ล        | ช        | ร ช      | ร        | ม ร     | ทุ ล     |          |
|     |   | - ร -    | - ร ม     | - ล -    | ช ช - ล  | - ทุ - ร | - ทุ -   | ล ล -   | ช ช - ม  | 4 [36]   |
|     |   | ล ทุ     | ด         | ล ช      | ล        | ทุ ร     | ทุ ล     | ช       | ทุ       |          |
| 2.1 |   | - - ทุ ล | - - ทุ ทุ | - - ทุ ร | - ทุ ทุ  | - ช - -  | ล ทุ - ร | - ม - ร | - ทุ - ล | 5 [37]   |
|     |   | ล        | ทุ        | ร        | ทุ       | ร ช      | ร        | ม ร     | ทุ ล     |          |
|     |   | - ทุ - ร | - ทุ -    | ล ล -    | ช ช - ม  | - -      | - ร ม    | - ล -   | ช ช - ล  | 6 [38]   |
|     |   | ทุ ร     | ทุ ล      | ช        | ทุ       | ล ทุ     | ด        | ล ช     | ล        |          |
|     |   | - ทุ ล ล | - ล ล     | - ร - ช  | - - ล ทุ | - ร - ม  | - ร -    | ทุ ทุ - | ล ล - ช  | 7 [39]   |
|     |   | ร        | ล         | ล ช      | ทุ       | ร ม      | ร ทุ     | ล       | ช        |          |
|     |   | - ฬ      | - ม -     | - ร - ร  | - ช ช    | - ล ล    | - ทุ -   | ช ช -   | ล ล - ทุ | 8 [40]   |
|     |   | ม ร      | ร         | ล        | ช        | ล        | ทุ ช     | ล       | ทุ       |          |
| 3.1 |   | - ทุ -   | ล ล -     | ทุ ทุ -  | ร ร - ม  | - - ม ฬ  | - ล - -  | - ล - ฬ | - ทุ     | 9 [41]   |
|     |   | ทุ ล     | ทุ        | ร        | ม        | ร        | ม        | ร       | ม ร ทุ   |          |
|     |   | - ร - ม  | - ร -     | ทุ ทุ -  | ล ล - ช  | - ช - -  | ล ทุ - ร | - ม - ร | - ทุ - ล | 10 [42]  |
|     |   | ร ม      | ร ทุ      | ล        | ช        | ร ช      | ร        | ม ร     | ทุ ล     |          |
|     |   | - ร -    | - ร ม     | - ล -    | ช ช - ล  | - ทุ - ร | - ทุ -   | ล ล -   | ช ช - ม  | 11 [43]  |
|     |   | ล ทุ     | ด         | ล ช      | ล        | ทุ ร     | ทุ ล     | ช       | ทุ       |          |
|     |   | - ฬ - ม  | - ร - ด   | - -      | - - ร ม  | - ล ล    | - ทุ - ล | - ช - ม | - ช - ล  | 12 [44]  |
|     |   |          | ล         | ทุ ล ทุ  | ด        | ล        | ทุ ล     | ช ทุ    | ช ล      |          |
| 4.1 |   | - ร - ม  | - ร -     | ทุ ทุ -  | ล ล - ช  | - ช - -  | ล ทุ - ร | - ม - ร | - ทุ - ล | 13 [45]  |
|     |   | ร ม      | ร ทุ      | ล        | ช        | ร ช      | ร        | ม ร     | ทุ ล     |          |
|     |   | - ร -    | - ร ม     | - ล -    | ช ช - ล  | - ทุ - ร | - ทุ -   | ล ล -   | ช ช - ม  | 14 [46]  |
|     |   | ล ทุ     | ด         | ล ช      | ล        | ทุ ร     | ทุ ล     | ช       | ทุ       |          |
|     |   | - ล ล    | - ล ล     | - ล -    | ช ช - ล  | - ร - ทุ | - ล -    | ฬ ฬ -   | ม ม - ร  | 15 [47]  |
|     |   | ล        | ล         | ล ช      | ล        | ร ทุ     | ล ฬ      | ม       | ร        |          |
|     |   | - ร - ทุ | - -       | - ล ทุ   | ด ร      | - ด      | - ทุ - ร | - -     | ร ม - ช  | 16 [48]  |
|     |   | ช        | ล ช ร     | ช        | ล ทุ     | ทุ ล     | ล        | ทุ ด    | ช        |          |
| 1.2 |   | - ล ช ช  | - ช ช     | - ร - ช  | - - ล ทุ | - ร - ม  | - ร -    | ทุ ทุ - | ล ล - ช  | 17 [49]  |
|     |   | ด        | ช         | ล ช      | ทุ       | ร ม      | ร ทุ     | ล       | ช        |          |
|     |   | - ม ฬ    | - ล - -   | - ล - ฬ  | -        | - ทุ -   | ล ล -    | ทุ ทุ - | ร ร - ม  | 18 [50*] |
|     |   | ร        | ม         | ร        | ม ร ทุ   | ฬ ม      | ฬ        | ร       | ม        |          |

|       |  |                                                             |       |
|-------|--|-------------------------------------------------------------|-------|
| 2.2   |  | - ช ช - ล - ร - - - ร ม - ช - ล ล - ท - ช ช - ล ล - ท       | 19    |
|       |  | ช ล ท - ร - ม - ม - ร - ท - ร - ม - ร - ท ท - ล ล - ช       | 20    |
|       |  | ช ร ม ช ม ร ท ร ม ร ท ล ช                                   |       |
|       |  | - ม - ร ร - ม ม - ช ช - ล - ช - - ล ท - ร - ม - ร - ท - ล   | 21    |
|       |  | ท ล ท ล ช ร ช ร ม ร ท ล                                     |       |
|       |  | - ร - ท - ล - ฟ ฟ - ม ม - ร - ด - ท - ร - - - ร ม - ช       | 22    |
|       |  | ร ท ล ฟ ม ร ท ล ล ท ล ท ค ช                                 |       |
|       |  | - ร ม - ช - ล - ท - ล - ช - ม - ม - ร ร - ม ม - ช ช - ล     | 23    |
|       |  | ด ช ล ท ล ช ท ท ล ท ช ล                                     |       |
|       |  | - ท - ล - ช - ฟ - ม - ช ล - - - ร - - ด - - - ท - - ทท      | 24    |
|       |  | ท ล ช ม ร ฟ ล ทล ฟ ท                                        |       |
| 3.2   |  | - ท - ล ล - ท ท - ร ร - ม - ม ฟ - ล - - ล - ฟ -             | 25    |
|       |  | ฟ ม ฟ ร ม ร ม ร ม ร ท                                       |       |
|       |  | - ด - ท - ร - - - ร - ม ฟ - ล - ท - ล - ฟ ฟ - ม ม - ร       | 26    |
|       |  | ท ล ล ร ล ร ล ท ล ฟ ม ร                                     |       |
|       |  | - ล ล - ท - ช - ล - ท - ค - ร - ด - ฟ - - - ร - ม ฟ         | 27    |
|       |  | ล ท ช ล ท ค ร ท ล ม ร ล ร                                   |       |
| 4.2   |  | - ม ฟ - ล - ท - ร - ท - ล - ฟ - ล - ท - ล - ฟ ฟ - ม ม - ร   | 28    |
|       |  | ร ล ท ร ท ล ฟ ล ท ล ฟ ม ร                                   |       |
|       |  | - ท - ล ล - ท ท - ร - ม - - ม ฟ - ล - - - ล - ฟ - - ท       | 29    |
|       |  | ฟ ม ฟ ร ม ร ม ร ม ร ท                                       |       |
|       |  | - ร - ท - ล - ช ช - ล ล - ท - ฟ - ม - ร - ด - - - - ร ม     | 30    |
|       |  | ร ท ล ช ล ท ฟ ล ล ล ล ท ล ท ค                               |       |
|       |  | - ร - ม - ร - ท ท - ล ล - ช - ล ท - ร - ม - ร - ค - ท - ล   | 31    |
|       |  | ร ม ร ท ล ช ช ร ม ร ค ท ล                                   |       |
|       |  | - ร - - ร ม - ล - ช ช - ล - ร - ท - ล - ฟ ฟ - ม ม - ร       | 32 :) |
|       |  | ล ท ค ล ช ล ร ท ล ฟ ม ร                                     |       |
| *Coda |  |                                                             |       |
|       |  | - - - ท - - - ร - ม - ร - ท - ล - ท - ร - ท - ล ล - ช ช - ม | 33    |
|       |  | ท ร ม ร ท ล ท ร ท ล ช ท                                     |       |
|       |  | - ฟ - ม - ร - ค - - - - ร ม - ล ล - ท - ล - ช - ม - ช - ล   | 34    |
|       |  | ล ล ท ล ท ค ล ท ล ช ท ช ล                                   |       |
|       |  | - ร - ม - ร - ท ท - ล ล - ช - - ล ท - ร - ม - ร - ค - ท - ล | 35    |
|       |  | ร ม ร ท ล ช ช ร ม ร ค ท ล                                   |       |
|       |  | - ร - - ร ม - ล - ช ช - ล - ม ร ท - ล - ฟ - - - ม - - - ร   | 36 // |
|       |  | ล ท ค ล ช ม ร ท ล ฟ ม ร                                     |       |

# Sadhukarn

Intro.

Chue Dontrirot (TD)

|     |   |         |         |         |         |         |         |         |         |          |
|-----|---|---------|---------|---------|---------|---------|---------|---------|---------|----------|
|     | R | - - - ร | - - - ม | - - - ม | - ช - ล | - - -   | - ล - ล | - - - ช | - - - ร | 0        |
|     | F | ล       | ท       | ม       | ช ล     | ล       | ล       | ช       | ล       |          |
| 1.1 |   | - - - ท | - ล -   | ร ร -   | ม ม - ฟ | - ล - ท | - ล -   | ฟ ฟ -   | ม ม - ร | 1 [33]   |
|     |   | ฟ       | ม ร     | ม       | ฟ       | ล ท     | ล ฟ     | ม       | ร       |          |
|     |   | - ฟ - ม | - -     | - - -   | - ร - ม | - ร - ช | - ล - ท | - ล -   | ท ท - ล | 2 [34]   |
|     |   |         | ร ท     | ล ท     | ล ท     | ล ช     | ล ท     | ล ท     | ล       |          |
|     |   | - ร - ม | - ร -   | ท ท -   | ล ล - ช | - - ล ท | - ร - ม | - ร - ค | - ท - ล | 3 [35]   |
|     |   | ร ม     | ร ท     | ล       | ช       | ช       | ร ม     | ร ค     | ท ล     |          |
|     |   | - - -   | - ม - ม | - ร ม   | - ช - ล | - ท - ร | - ท -   | ล ล -   | ช ช - ม | 4 [36]   |
|     |   | ม       |         | ค       | ช ล     | ท ร     | ท ล     | ช       | ท       |          |
| 2.1 |   | - ฟ     | - ม -   | - ร - ร | - - - ท | - ช - - | ล ท - ร | - ม - ร | - ท - ล | 5 [37]   |
|     |   | ม ร     | ร       | ล       | ท       | ร ช     | ร       | ม ร     | ท ล     |          |
|     |   | - ท - ร | - ท -   | ล ล -   | ช ช - ม | - -     | - ร ม   | - - ม   | - ช - ล | 6 [38]   |
|     |   | ท ร     | ท ล     | ช       | ท       | ล ท     | ค       | ม       | ช ล     |          |
|     |   | - - - ม | - ร -   | ช ช -   | ล ล - ท | - ร - ม | - ร -   | ท ท -   | ล ล - ช | 7 [39]   |
|     |   | ท       | ล ช     | ล       | ท       | ร ม     | ร ท     | ล       | ช       |          |
|     |   | - ฟ     | - ม -   | - ร - ร | - - - ช | - ร - ท | - ล -   | ช ช -   | ล ล - ท | 8 [40]   |
|     |   | ม ร     | ร       | ล       | ช       | ร ท     | ล ช     | ล       | ท       |          |
| 3.1 |   | - ท -   | ล ล -   | ท ท -   | ร ร - ม | - - ม ฟ | - ล - - | - ล - ฟ | - ท     | 9 [41]   |
|     |   | ท ล     | ท       | ร       | ม       | ร       | ม       | ร       | ม ร ท   |          |
|     |   | - ร - ม | - ร -   | ท ท -   | ล ล - ช | - - ล ท | - ร - ม | - ร - ค | - ท - ล | 10 [42]  |
|     |   | ร ม     | ร ท     | ล       | ช       | ช       | ร ม     | ร ค     | ท ล     |          |
|     |   | - - -   | - ม - ม | - ร ม   | - ช - ล | - ท - ร | - ท -   | ล ล -   | ช ช - ม | 11 [43]  |
|     |   | ม       |         | ค       | ช ล     | ท ร     | ท ล     | ช       | ท       |          |
|     |   | - ฟ - ม | - -     | - - -   | - ร - ม | - ร - ช | - - ล ท | - ล -   | ท ท - ล | 12 [44]  |
|     |   |         | ร ท     | ล ท     | ล ท     | ล ช     | ท       | ล ท     | ล       |          |
| 4.1 |   | - ร - ม | - ร -   | ท ท -   | ล ล - ช | - - ล ท | - ร - ม | - ร - ค | - ท - ล | 13 [45]  |
|     |   | ร ม     | ร ท     | ล       | ช       | ช       | ร ม     | ร ค     | ท ล     |          |
|     |   | - -     | - ร ม   | - - ม   | - ช - ล | - ท - ร | - ท -   | ล ล -   | ช ช - ม | 14 [46]  |
|     |   | ล ท     | ค       | ม       | ช ล     | ท ร     | ท ล     | ช       | ท       |          |
|     |   | - - - ช | - ล ล   | - - - ท | - ล ล   | - ล - ท | - ล -   | ฟ ฟ -   | ม ม - ร | 15 [47]  |
|     |   | ช       | ล       | ท       | ล       | ล ท     | ล ฟ     | ม       | ร       |          |
|     |   | - ค - ร | ม ร -   | ล ท     | ค ร     | - ค     | - ท - ร | - -     | ร ม - ช | 16 [48]  |
|     |   | ช       | ค ท     | ล ช     | ล ท     | ท ล     | ล       | ท ค     | ช       |          |
| 1.2 |   | - ม -   | ร ร -   | ช ช -   | ล ล - ท | - ร - ม | - ร -   | ท ท -   | ล ล - ช | 17 [49]  |
|     |   | ท ล     | ช       | ล       | ท       | ร ม     | ร ท     | ล       | ช       |          |
|     |   | - ม ฟ   | - ล - - | - ล - ฟ | -       | - ท -   | ล ล -   | ท ท -   | ร ร - ม | 18 [50*] |
|     |   | ร       | ม       | ร       | ม ร ท   | ฟ       | ม       | ฟ       | ร       | ม        |

|     |  |                   |                   |                   |                   |                   |                   |                   |                  |       |
|-----|--|-------------------|-------------------|-------------------|-------------------|-------------------|-------------------|-------------------|------------------|-------|
| 2.2 |  | -    ม    ฟ       | -    ม    -       | -    ร    -    ร  | -    -    ช       | -    รึ    -    ท | -    ล    -       | ช    ช    -       | ล    ล    -    ท | 19    |
|     |  | ร                 | รึ                | ล                 | ช                 | ร    ท            | ล    ช            | ล                 | ท                |       |
|     |  | -    ล    ท       | -    รึ    -    ม | -    ม    -    ม  | -    รึ    -    ท | -    รึ    -    ม | -    รึ    -      | ท    ท    -       | ล    ล    -    ช | 20    |
|     |  | ช                 | ร    ม            | ช    ม            | ร    ท            | ร    ม            | ร    ท            | ล                 | ช                |       |
|     |  | -    ม    -       | ร    ร    -       | ม    ม    -       | ช    ช    -    ล  | -    ช    -    -  | ล    ท    -    รึ | -    ม    -    รึ | -    ท    -    ล | 21    |
|     |  | ท    ล            | ท                 | ช                 | ล                 | ช                 | ท    ร            | ม    ร            | ท    ล           |       |
|     |  | -    -    ร       | -    -    ม    ฟ  | -    ล    -    ล  | -    ฟ            | -    ด            | -    ท    -    ร  | -    -            | ร    ม    -    ช | 22    |
|     |  | ล                 | ร                 | ฟ                 | ม    ร            | ท    ล            | ล                 | ท    ด            | ช                |       |
|     |  | -    -    -       | -    ล    -    ล  | -    ท    -    ล  | -    ช    -    ม  | -    ม    -       | ร    ร    -       | ม    ม    -       | ช    ช    -    ล | 23    |
|     |  | ล                 | ท    ล            | ช    ท            | ท    ล            | ท                 | ช                 | ล                 |                  |       |
| 3.2 |  | -    ท    -    ล  | -    ช    -    ฟ  | -    ม            | -    ช    ล       | -    -    -    ร  | -    -    ด       | -    -    -    ท  | -    -    ท    ท | 24    |
|     |  | ท    ล            | ช                 | ม    ร            | ฟ                 | ล                 | ท    ล            | ฟ                 | ท                |       |
|     |  | -    ท    -       | ล    ล    -       | ท    ท    -       | ร    ร    -    ม  | -    ม    ฟ       | -    ล    -    -  | -    ล    -    ฟ  | -                | 25    |
|     |  | ฟ    ม            | ฟ                 | รึ                | ม    ร            | ม    ร            | ม    ร            | ม    ร    ท       |                  |       |
|     |  | -    ด            | -    ฟ            | -    -    ร       | -    ม    ฟ       | -    ล    -    ท  | -    ล    -       | ฟ    ฟ    -       | ม    ม    -    ร | 26    |
|     |  | ท    ล            | ม    ร            | ล                 | ร                 | ล    ท            | ล    ฟ            | ม                 | ร                |       |
|     |  | -    ล    ล       | -    ท    -    ช  | -    ล    -    ท  | -    ค    -    รึ | -    ท    -       | ล    ล    -    รึ | -    ค    -    ท  | -    ล    -    ฟ | 27    |
|     |  | ล                 | ท    ช            | ล    ท            | ด    ร            | ท    ล            | ร                 | ด    ท            | ล    ด           |       |
|     |  | -    ม    ฟ       | -    ล    -    ท  | -    รึ    -    ท | -    ล    -    ฟ  | -    ล    -    ท  | -    ล    -       | ฟ    ฟ    -       | ม    ม    -    ร | 28    |
|     |  | ร                 | ล    ท            | ร    ท            | ล    ด            | ล    ท            | ล    ฟ            | ม                 | ร                |       |
| 4.2 |  | -    ท    -       | ล    ล    -       | ท    ท    -       | ร    ร    -    ม  | -    ม    ฟ       | -    ล    -       | -    ล    -    ฟ  | -    ท           | 29    |
|     |  | ฟ    ม            | ฟ                 | รึ                | ม    ร            | ม    ร            | ม    ร            | ม    ร    ท       |                  |       |
|     |  | -    รึ    -    ท | -    ล    -       | ช    ช    -       | ล    ล    -    ท  | -    ฟ    -    ม  | -    -            | -    -    -       | -    ร    -    ม | 30    |
|     |  | ร    ท            | ล    ช            | ล                 | ท                 | ร    ท            | ล    ท            | ล    ท            |                  |       |
|     |  | -    รึ    -    ม | -    รึ    -      | ท    ท    -       | ล    ล    -    ช  | -    ล    ท       | -    รึ    -    ม | -    รึ    -    ค | -    ท    -    ล | 31    |
|     |  | ร    ม            | ร    ท            | ล                 | ช                 | ช                 | ร    ม            | ร    ด            | ท    ล           |       |
|     |  | -    -    -       | -    ม    -    ม  | -    ร    ม       | -    ช    -    ล  | -    รึ    -    ท | -    ล    -       | ฟ    ฟ    -       | ม    ม    -    ร | 32 :) |
|     |  | ม                 | ด                 | ช    ล            | ร    ท            | ล    ฟ            | ม                 | ร                 |                  |       |
|     |  | *Coda             |                   |                   |                   |                   |                   |                   |                  |       |
|     |  | -    -    -    ท  | -    -    -    รึ | -    ม    -    รึ | -    ท    -    ล  | -    ท    -    รึ | -    ท    -       | ล    ล    -       | ช    ช    -    ม | 33    |
|     |  | ท                 | ร                 | ม    ร            | ท    ล            | ท    ร            | ท    ล            | ช                 | ท                |       |
|     |  | -    ฟ    -    ม  | -    -            | -    -    -       | -    ร    -    ม  | -    ร    -    ช  | -    -    ล    ท  | -    ล    -       | ท    ท    -    ล | 34    |
|     |  |                   | ร    ท            | ล    ท            | ล    ท            | ล    ช            | ท                 | ล    ท            | ล                |       |
|     |  | -    รึ    -    ม | -    รึ    -      | ท    ท    -       | ล    ล    -    ช  | -    -    ล    ท  | -    รึ    -    ม | -    รึ    -    ค | -    ท    -    ล | 35    |
|     |  | ร    ม            | ร    ท            | ล                 | ช                 | ช                 | ร    ม            | ร    ด            | ท    ล           |       |
|     |  | -    -    -       | -    ม    -    ม  | -    ร    ม       | -    ช    -    ล  | -    รึ    -    ท | -    ล    -    ฟ  | -    -    -    ม  | -    -    -    ร | 36 // |
|     |  | ม                 | ด                 | ช    ล            | ร    ท            | ล    ด            | ท                 | ล                 | ล                |       |

# Sadhukarn

Intro.

Tuen Phatayakul (TP)

|     |   |   |   |   |   |   |   |   |   |   |   |   |   |   |   |   |   |   |   |   |   |   |   |   |   |   |   |        |         |          |         |         |
|-----|---|---|---|---|---|---|---|---|---|---|---|---|---|---|---|---|---|---|---|---|---|---|---|---|---|---|---|--------|---------|----------|---------|---------|
| R   | - | - | - | ร | - | - | - | ม | - | - | - | ช | - | - | - | ล | - | ร | - | ท | - | ล | - | ฟ | ฟ | - | ม | ม      | -       | ร        | 0       |         |
|     | F |   |   | ล |   |   |   | ท |   |   |   | ช |   |   |   | ล |   | ร | ท |   | ล | ฟ |   |   |   | ม |   |        |         | ร        |         |         |
| 1.1 | - | - | - | ล | - | ท | - |   | ร | ร | - |   | ม | ม | - | ฟ | - | ล | - | ท | - | ล | - | ฟ | ฟ | - | ม | ม      | -       | ร        | 1 [33]  |         |
|     |   |   |   | ม |   | ฟ | ร |   |   |   | ม |   |   | ฟ |   | ล | ท | ล | ฟ |   |   | ม |   |   |   |   |   |        |         | ร        |         |         |
|     | - | ฟ | - | ม | - |   | - |   | - |   | - | ร | - | ม | - | ล | ล | - | ช | - | ม | - | ร | ม | - | ช | - | ล      | 2 [34]  |          |         |         |
|     |   |   |   |   |   |   |   | ร | ท |   | ล | ท |   | ล | ท |   |   | ช | ท |   | ด |   |   | ช |   |   |   |        |         | ล        |         |         |
|     | - | ร | - | ม | - | ร | - |   | ท | ท | - |   | ล | ล | - | ช | - | ล | ท | - | ร | - | ม | - | ร | - | ด | -      | ท       | -        | ล       | 3 [35]  |
|     |   | ร |   | ม |   | ร |   | ท |   |   |   | ล |   | ช |   | ช |   |   | ร | ม |   | ร | ด |   | ท |   |   | ล      |         | ล        |         |         |
|     | - | ม | - |   | ม | ร | - | ม | - | ล | - |   | ช | ช | - | ล | - | ท | - | ร | - | ท | - | ล | ล | - | ช | ช      | -       | ม        | 4 [36]  |         |
|     |   | ร |   | ท |   | ล |   | ท |   | ล | ช |   |   | ล |   | ท | ร | ท |   | ล |   |   | ช |   |   |   |   |        | ท       |          |         |         |
| 2.1 | - | - | - | ร | - | ม | - |   | ช | ช | - |   | ล | ล | - | ท | - | ล | ท | - | ร | - | ม | - | ร | - | ด | -      | ท       | -        | ล       | 5 [37]  |
|     |   |   |   | ล |   | ท | ช |   |   |   | ล |   |   | ท |   | ช |   |   | ร | ม |   | ร | ด |   | ท |   |   | ล      |         | ล        |         |         |
|     | - |   | ร | ม | - | ช | - | ล | - | ท | - | ล | - | ช | - | ม | - | ม | - |   | ร | ร | - | ม | ม | - | ช | ช      | -       | ล        | 6 [38]  |         |
|     |   |   |   |   |   | ช |   | ล |   | ท |   | ล | ช | ท |   | ท |   | ล |   |   |   | ท |   |   | ช |   |   |        | ล       |          |         |         |
|     | - | - | - | ร | - | ม | - |   | ช | ช | - |   | ล | ล | - | ท | - | ร | - | ม | - | ร | - |   | ท | ท | - | ล      | ล       | -        | ช       | 7 [39]  |
|     |   |   |   | ล |   | ท | ช |   |   |   | ล |   | ท |   | ร | ม |   | ร | ท |   |   | ล |   |   |   |   |   | ช      |         | ช        |         |         |
|     | - | ฟ |   |   | - | ม | - |   | - | ร | - | ร | - | - | ช | - | ร | - | ท | - | ล | - | ช | ช | - | ล | ล | -      | ท       | 8 [40]   |         |         |
|     |   | ม | ร |   |   | ร |   |   | ล |   | ช |   | ร | ท |   | ล | ช |   |   | ล |   |   |   |   |   |   |   | ท      |         |          |         |         |
| 3.1 | - | ท | - |   | ล | ล | - |   | ท | ท | - |   | ร | ร | - | ม | ฟ | - | ล | - |   | ล | - | ฟ |   | - | ท | 9 [41] |         |          |         |         |
|     |   | ท |   | ล |   |   | ท |   |   | ร |   | ม | ร |   |   | ม |   | ร |   | ม | ร |   |   | ม | ร |   | ท |        |         |          |         |         |
|     | - | ร | - | ม | - | ร | - |   | ท | ท | - |   | ล | ล | - | ช | - | ล | ท | - | ร | - | ม | - | ร | - | ด | -      | ท       | -        | ล       | 10 [42] |
|     |   | ร |   | ม |   | ร |   | ท |   |   | ล |   | ช |   | ช |   |   | ร | ม |   | ร | ด |   | ท |   |   | ล |        | ล       |          |         |         |
|     | - | ม | - |   | ร | ร | - |   | ม | ม | - |   | ช | ช | - | ล | - | ท | - | ร | - | ท | - | ล | ล | - | ช | ช      | -       | ม        | 11 [43] |         |
|     |   | ท |   | ล |   |   | ท |   |   | ช |   | ล |   | ท | ร | ท |   | ล |   | ล |   | ช |   |   |   |   |   | ท      |         |          |         |         |
|     | - | ฟ | - | ม | - | ร | - | ด |   | - |   | - | ร | ม | - | ล | ล | - | ช | - | ม | - | ร | ม | - | ช | - | ล      | 12 [44] |          |         |         |
|     |   |   |   | ล |   | ท | ล | ท |   | ด |   |   | ล |   |   | ช | ท |   | ด |   |   | ช |   |   |   |   |   | ล      |         |          |         |         |
| 4.1 | - | ร | - | ม | - | ร | - |   | ท | ท | - |   | ล | ล | - | ช | - | ล | ท | - | ร | - | ม | - | ร | - | ด | -      | ท       | -        | ล       | 13 [45] |
|     |   | ร |   | ม |   | ร |   | ท |   |   | ล |   | ช |   | ช |   |   | ร | ม |   | ร | ด |   | ท |   |   | ล |        | ล       |          |         |         |
|     | - | ม | - |   | ร | ร | - |   | ม | ม | - |   | ช | ช | - | ล | - | ท | - | ร | - | ท | - | ล | ล | - | ช | ช      | -       | ม        | 14 [46] |         |
|     |   | ท |   | ล |   |   | ท |   |   | ช |   | ล |   | ท | ร | ท |   | ล |   | ล |   | ช |   |   |   |   |   | ท      |         |          |         |         |
|     | - | - | ล | ช | - |   | ล | ล | - | - | ล | ท | - |   | ล | ล | - | ร | - | ท | - | ล | - | ฟ | ฟ | - | ม | ม      | -       | ร        | 15 [47] |         |
|     |   |   | ช |   | ล |   |   | ท |   | ล |   |   | ร | ท |   | ล | ฟ |   |   | ม |   |   |   |   |   |   |   | ร      |         |          |         |         |
|     | - |   | ช | ช | - | ร | - | ช | - | ล | - | ท | - | ด | - | ร | - | ม | ม | - | ร | - |   | ท | ท | - | ล | ล      | -       | ช        | 16 [48] |         |
|     |   | ช |   | ล | ช |   | ล | ท |   | ด | ร | ม |   |   | ร | ท |   |   | ล |   |   |   |   |   |   |   |   | ช      |         |          |         |         |
| 1.2 | - | ม | - |   | ร | ร | - |   | ช | ช | - |   | ล | ล | - | ท | - | ร | - | ม | - | ร | - |   | ท | ท | - | ล      | ล       | -        | ช       | 17 [49] |
|     |   | ท |   | ล |   |   | ช |   |   | ล |   | ท |   | ร | ม |   | ร | ท |   |   | ล |   |   |   |   |   | ช |        | ช       |          |         |         |
|     | - |   | ม | ฟ | - | ล | - |   | - | ล | - | ฟ |   | - | ท | - |   | - | ท | - |   | - | ล | ล | - | ท | ท | -      | ม       | 18 [50*] |         |         |
|     |   | ร |   |   | ม |   | ร |   | ม | ร | ท |   | ฟ | ม |   | ฟ |   |   | ร |   |   |   |   |   |   |   |   | ม      |         |          |         |         |



|     |         |         |         |         |         |         |         |         |       |    |
|-----|---------|---------|---------|---------|---------|---------|---------|---------|-------|----|
|     | - ช ช - | - ล - ร | - - -   | ร ม - ช | - ร - ท | - ล -   | ช ช -   | ล ล - ท | 19    |    |
|     | ช       | ล       | ท       | ด       | ช       | ร       | ท       | ล       | ท     |    |
|     | - ล ท   | - ร - ม | - ม - ม | - ร - ท | - ร - ม | - ร -   | ท ท -   | ล ล - ช | 20    |    |
|     | ช       | ร       | ม       | ช       | ม       | ร       | ท       | ล       | ช     |    |
| 2.2 | - - ช ช | - - ช ช | - ล ล   | - ล ล   | - ช - ล | - ท -   | ด -     | ร -     | ล     | 21 |
|     | ช       | ช       | ล       | ล       | ช       | ล       | ท       | ด       | ร     | ล  |
|     | - - ร   | - - ม ฟ | - ล - ล | - ฟ     | - ด     | - ท - ร | - - -   | ร ม - ช | 22    |    |
|     | ล       | ร       | ฟ       | ม       | ร       | ท       | ล       | ท       | ด     | ช  |
|     | - ร ม   | - ช - ล | - ท - ล | - ช - ม | - ม -   | ร ร -   | ม ม -   | ช ช - ล | 23    |    |
|     | ด       | ช       | ล       | ท       | ล       | ช       | ท       | ล       | ช     | ล  |
|     | - ร - ท | - ล - ช | - ล -   | ท ท - ล | - - - ร | - - ด   | - - - ท | - - ท   | 24    |    |
|     | ร       | ท       | ล       | ช       | ล       | ท       | ล       | ท       | ล     | ท  |
| 3.2 | - ท -   | ล ล -   | ท ท -   | ร ร - ม | - ฟ ฟ   | - ฟ -   | ม ม -   | ร ร - ท | 25    |    |
|     | ฟ       | ม       | ฟ       | ร       | ม       | ฟ       | ล       | ม       | ร     | ฟ  |
|     | - ล - ฟ | - ม -   | ร ร -   | ม ม - ฟ | - ล - ท | - ล -   | ฟ ฟ -   | ม ม - ร | 26    |    |
|     | ล       | ฟ       | ม       | ร       | ม       | ฟ       | ล       | ท       | ล     | ฟ  |
|     | - ล ล   | - ท - ช | - ล - ท | - ด - ร | - ล - ล | - ฟ     | - - ร   | - ม ฟ   | 27    |    |
|     | ล       | ท       | ช       | ล       | ท       | ด       | ร       | ฟ       | ม     | ร  |
|     | - ม ฟ   | - ล - ท | - ร - ท | - ล - ฟ | - ล - ท | - ล -   | ฟ ฟ -   | ม ม - ร | 28    |    |
|     | ร       | ล       | ท       | ร       | ท       | ล       | ด       | ล       | ฟ     | ม  |
| 4.2 | - ท -   | ล ล -   | ท ท -   | ร ร - ม | - ม ฟ   | - ล -   | - ล - ฟ | - ท     | 29    |    |
|     | ฟ       | ม       | ฟ       | ร       | ม       | ร       | ล       | ฟ       | ม     | ร  |
|     | - ร - ท | - ล -   | ช ช -   | ล ล - ท | - ฟ - ม | - -     | - ม - ร | - - - ม | 30    |    |
|     | ร       | ท       | ล       | ช       | ล       | ท       | ร       | ท       | ล     | ท  |
|     | - ร - ม | - ร -   | ท ท -   | ล ล - ช | - ล ท   | - ร - ม | - ร -   | ด -     | ล     | 31 |
|     | ร       | ม       | ร       | ท       | ล       | ช       | ร       | ม       | ร     | ด  |
|     | - ม -   | ร ร -   | ม ม -   | ช ช - ล | - ร - ท | - ล -   | ฟ ฟ -   | ม ม - ร | 32 :  |    |
|     | ท       | ล       | ท       | ช       | ล       | ร       | ท       | ล       | ฟ     | ม  |
|     | *Coda   |         |         |         |         |         |         |         |       |    |
|     | - ท -   | ท ท - ร | - ม - ร | - ท - ล | - ท - ร | - ท -   | ล ล -   | ช ช - ม | 33    |    |
|     | ท       | ท       | ร       | ม       | ร       | ท       | ล       | ท       | ล     | ช  |
|     | - ฟ - ม | - ร - ด | -       | - ร ม   | - ล ล   | - ช - ม | - ร ม   | - ช - ล | 34    |    |
|     | ฟ       | ม       | ร       | ด       | ล       | ช       | ท       | ล       | ช     | ล  |
|     | - ร - ม | - ร -   | ท ท -   | ล ล - ช | - ล ท   | - ร - ม | - ร -   | ด -     | ล     | 35 |
|     | ร       | ม       | ร       | ท       | ล       | ช       | ร       | ม       | ร     | ด  |
|     | - - - ร | - - - ม | - - - ช | - - - ล | - ร - ท | - ล -   | ฟ ฟ -   | ม ม - ร | 36 // |    |
|     | ล       | ท       | ช       | ล       | ร       | ท       | ล       | ฟ       | ม     | ร  |

# Sadhukarn

Intro.

Thawin Attakisna (TT)

|     |   |          |         |         |           |          |          |          |         |         |          |
|-----|---|----------|---------|---------|-----------|----------|----------|----------|---------|---------|----------|
|     | R | - - - ร  | - - - ม | - - - ม | - ช - ล   | - - -    | - ล - ล  | - - - ช  | - - - ร | 0       |          |
|     | F | ล        | ทุ      | ม       | ช ล       | ล        |          | ช        | ล       |         |          |
| 1.1 |   | - - - ทุ | - ล -   | ร ร -   | ม ม - ฬ   | - ล - ท  | - ล -    | ฬ ฬ -    | ม ม - ร | 1 [33]  |          |
|     |   | ฬ        | ม ร     | ม       | ฬ         | ล ทุ     | ล ฬ      | ม        | ร       |         |          |
|     |   | - ท - รั | - ท -   | ล ล -   | ช ช - ม   | - -      | - ร ม    | - ม ม    | - ช - ล | 2 [34]  |          |
|     |   | ทุ ร     | ทุ ล    | ช       | ทุ        | ล ทุ     | ด        | ม        | ช ล     |         |          |
|     |   | - - - ม  | - รั -  | ท ท -   | ล ล - ช   | - ร - ช  | - - ล ท  | - ล -    | ท ท - ล | 3 [35]  |          |
|     |   | ม        | ร ทุ    | ล       | ช         | ล ช      | ทุ       | ล ทุ     | ล       |         |          |
|     |   | - - -    | - ม - ม | - ร ม   | - ช - ล   | - ท - รั | - ท -    | ล ล -    | ช ช - ม | 4 [36]  |          |
|     |   | ม        |         | ด       | ช ล       | ทุ ร     | ทุ ล     | ช        | ทุ      |         |          |
| 2.1 |   | - ฬ      | - ม -   | - ร - ร | - - ท ท   | - ล ล    | - ท - รั | - ม - รั | - ท - ล | 5 [37]  |          |
|     |   | ม ร      | ร       | ล       | ทุ        | ล        | ทุ ร     | ม ร      | ทุ ล    |         |          |
|     |   | - ท - รั | - ท -   | ล ล -   | ช ช - ม   | - -      | - ร ม    | - ม ม    | - ช - ล | 6 [38]  |          |
|     |   | ทุ ร     | ทุ ล    | ช       | ทุ        | ล ทุ     | ด        | ม        | ช ล     |         |          |
|     |   | - - - ม  | - ร -   | ช ช -   | ล ล - ท   | - รั - ม | - รั -   | ท ท -    | ล ล - ช | 7 [39]  |          |
|     |   | ทุ       | ล ช     | ล       | ทุ        | ร ม      | ร ทุ     | ล        | ช       |         |          |
|     |   | - ฬ      | - ม -   | - ร - ร | - ช ช     | - ล ล    | - ท - ช  | - - ล ท  | - ล - ท | 8 [40]  |          |
|     |   | ม ร      | ร       | ล       | ช         | ล        | ทุ ช     | ทุ       | ล ทุ    |         |          |
| 3.1 |   | - ท -    | ล ล -   | ท ท -   | รั รั - ม | - ม ฬ    | - ล -    | - ล - ฬ  | - ท     | 9 [41]  |          |
|     |   | ทุ ล     | ทุ      | ร       | ม         | ร        | ม        | ร        | ม ร ทุ  |         |          |
|     |   | - - - ม  | - รั -  | ท ท -   | ล ล - ช   | - ร - ช  | - - ล ท  | - ล -    | ท ท - ล | 10 [42] |          |
|     |   | ม        | ร ทุ    | ล       | ช         | ล ช      | ทุ       | ล ทุ     | ล       |         |          |
|     |   | - - -    | - ม - ม | - ร ม   | - ช - ล   | - ท - รั | - ท -    | ล ล -    | ช ช - ม | 11 [43] |          |
|     |   | ม        |         | ด       | ช ล       | ทุ ร     | ทุ ล     | ช        | ทุ      |         |          |
|     |   | - ฬ - ม  | - ม -   | - - -   | - ร - ม   | - ท - ล  | - ช - ม  | - ร ม    | - ช - ล | 12 [44] |          |
|     |   |          | ร ทุ    | ล ทุ    | ล ทุ      | ทุ ล     | ช ทุ     | ด        | ช ล     |         |          |
| 4.1 |   | - - - ม  | - รั -  | ท ท -   | ล ล - ช   | - ร - ช  | - - ล ท  | - ล -    | ท ท - ล | 13 [45] |          |
|     |   | ม        | ร ทุ    | ล       | ช         | ล ช      | ทุ       | ล ทุ     | ล       |         |          |
|     |   | - -      | - ร ม   | - - ม   | - ช - ล   | - ท - รั | - ท -    | ล ล -    | ช ช - ม | 14 [46] |          |
|     |   | ล ทุ     | ด       | ม       | ช ล       | ทุ ร     | ทุ ล     | ช        | ทุ      |         |          |
|     |   | - - ล ช  | - ล ล   | - - ล ท | - ล ล     | - รั - ท | - ล -    | ฬ ฬ -    | ม ม - ร | 15 [47] |          |
|     |   | ล ช      | ล       | ทุ      | ล         | ร ทุ     | ล ฬ      | ม        | ร       |         |          |
|     |   | - ร - ทุ | -       | - ล ทุ  | ด - ร     | - -      | - ม - ร  | - -      | ร ม - ช | 16 [48] |          |
|     |   | ช        | ล ช ร   | ช       | ร         | ล ทุ     | ล        | ทุ ด     | ช       |         |          |
| 1.2 |   | - - - ม  | - ร -   | ช ช -   | ล ล - ท   | - รั - ม | - รั -   | ท ท -    | ล ล - ช | 17 [49] |          |
|     |   | ทุ       | ล ช     | ล       | ทุ        | ร ม      | ร ทุ     | ล        | ช       |         |          |
|     |   | - ม ฬ    | - ล - - | - ล - ฬ | -         | - ท -    | ล ล -    | ทุ ทุ -  | ทุ ทุ - | ร ร - ม | 18 [50*] |
|     |   | ร        | ม       | ร       | ม ร ทุ    | ฬ ม      | ฬ        | ร        | ม       |         |          |

|       |           |           |           |           |           |           |           |           |       |
|-------|-----------|-----------|-----------|-----------|-----------|-----------|-----------|-----------|-------|
|       | - ช ช -   | - ล - ร - | - - -     | ร ม - ช - | - ล ล -   | - ท -     | ช ช -     | ล ล - ท   | 19    |
|       | ช         | ล         | ท         | ล         | ช         | ล         | ท         | ล         |       |
|       | - ล ท -   | - ร - ม - | - ม - ม - | - ร - ท - | - ร - ม - | - ร -     | ท ท -     | ล ล - ช   | 20    |
|       | ช         | ร         | ม         | ช         | ร         | ท         | ร         | ล         | ช     |
| 2.2   | - ท - ล - | - ช - ม - | - ร ม -   | - ช - ล - | - ช - ล - | - ท -     | ล -       | ล - ล -   | 21    |
|       | ท         | ล         | ช         | ล         | ช         | ล         | ท         | ล         |       |
|       | - ล - ท - | - ล -     | ฟ ฟ -     | ม ม - ร - | - -       | - ม - ร - | - -       | ร ม - ช   | 22    |
|       | ล         | ท         | ฟ         | ม         | ร         | ล         | ท         | ล         | ช     |
|       | - - -     | - ล - ล - | - ท - ล - | - ช - ม - | - ม -     | ม ร - ม - | - ล -     | ช ช - ล   | 23    |
|       | ล         | ล         | ท         | ช         | ม         | ร         | ล         | ช         | ล     |
|       | - ท - ล - | - ช - ม - | - ร ม -   | - ช - ล - | - ม - ร - | - ท - ล - | - - -     | - ท - ท   | 24    |
|       | ท         | ล         | ช         | ล         | ม         | ร         | ท         | ล         |       |
| 3.2   | - ท -     | ล ล -     | ท ท -     | ร ร - ม - | - ม ฟ -   | - ล - -   | - ล - ฟ - | -         | 25    |
|       | ท         | ล         | ท         | ร         | ม         | ฟ         | ล         | ฟ         |       |
|       | - ท       | ล ฟ       | - - ร -   | - ม ฟ -   | - ล - ท - | - ล -     | ฟ ฟ -     | ม ม - ร   | 26    |
|       | ล         | ฟ         | ร         | ม         | ล         | ท         | ฟ         | ร         |       |
|       | - ล ล -   | - ท - ช - | - ล - ท - | - ล - ร - | - ท -     | ล ล - ร - | - ล - ท - | - ล - ฟ - | 27    |
|       | ล         | ท         | ล         | ล         | ท         | ล         | ล         | ล         |       |
|       | - ม ฟ -   | - ล - ท - | - ร - ท - | - ล - ฟ - | - ล - ท - | - ล -     | ฟ ฟ -     | ม ม - ร   | 28    |
|       | ร         | ล         | ท         | ล         | ล         | ท         | ล         | ร         |       |
| 4.2   | - ฟ - ม - | - ม -     | - - -     | - ร - ม - | - ม ฟ -   | - ล -     | - ล - ฟ - | - ท       | 29    |
|       | ฟ         | ม         | ร         | ม         | ฟ         | ล         | ฟ         | ท         |       |
|       | - - -     | - ท - ท - | - ช ช -   | - ล - ท - | - ฟ - ม - | - ม -     | - -       | - ร - ม   | 30    |
|       | ท         | ท         | ช         | ล         | ม         | ร         | ล         | ร         |       |
|       | - ร - ช - | - - ล ท - | - ร - ท - | - ล - ช - | - ร - ช - | - - ล ท - | - ล -     | ท ท - ล   | 31    |
|       | ล         | ล         | ร         | ล         | ล         | ล         | ล         | ล         |       |
|       | - - -     | - ม - ม - | - ร ม -   | - ช - ล - | - ร - ท - | - ล -     | ฟ ฟ -     | ม ม - ร   | 32 :) |
|       | ม         | ม         | ล         | ล         | ล         | ล         | ล         | ร         |       |
| *Coda |           |           |           |           |           |           |           |           |       |
|       | - ท ท -   | - ท ท -   | - ม - ร - | - ท - ล - | - ท - ร - | - ท -     | ล ล -     | ช ช - ม   | 33    |
|       | ท         | ท         | ม         | ล         | ร         | ล         | ล         | ช         | ท     |
|       | - ฟ - ม - | - ม -     | - - -     | - ร - ม - | - ท - ล - | - ช - ม - | - ร ม -   | - ช - ล   | 34    |
|       | ฟ         | ม         | ร         | ม         | ล         | ช         | ล         | ล         |       |
|       | - - - ม - | - ร -     | ท ท -     | ล ล - ช - | - ร - ช - | - - ล ท - | - ล -     | ท ท - ล   | 35    |
|       | ม         | ร         | ล         | ล         | ล         | ล         | ล         | ล         |       |
|       | - - -     | - ม - ม - | - ร ม -   | - ช - ล - | - ร - ท - | - ล - ฟ - | - - - ม - | - - - ร   | 36 // |
|       | ม         | ม         | ล         | ล         | ล         | ล         | ม         | ร         |       |

# Sadhukarn

Intro.

Pinij Chaisuwan II (TP2)

|     |   |         |         |         |         |         |         |         |         |          |
|-----|---|---------|---------|---------|---------|---------|---------|---------|---------|----------|
|     | R | - - - ร | - - - ม | - - - ม | - ช - ล | - - -   | - ล - ล | - - - ช | - - - ร | 0        |
|     | F | ล       | ท       | ม       | ช ล     | ล       | ล       | ช       | ล       |          |
| 1.1 |   | - - - ท | - ล -   | ร ร -   | ม ม - ฟ | - ล - ท | - ล -   | ฟ ฟ -   | ม ม - ร | 1 [33]   |
|     |   | ฟ       | ม ร     | ม       | ฟ       | ล ท     | ล ฟ     | ม       | ร       |          |
|     |   | - ฟ - ม | - -     | - - -   | - ร - ม | - ท - ล | - ช - ม | - ร ม   | - ช - ล | 2 [34]   |
|     |   |         | ร ท     | ล ท     | ล ท     | ท ล     | ช ท     | ด       | ช ล     |          |
|     |   | - ร - ม | - ร -   | ท ท -   | ล ล - ช | - ล ท   | - ร - ม | - ร - ด | - ท - ล | 3 [35]   |
|     |   | ร ม     | ร ท     | ล       | ช       | ช       | ร ม     | ร ด     | ท ล     |          |
|     |   | - - -   | - ม - ม | - ร ม   | - ช - ล | - ท - ร | - ท -   | ล ล -   | ช ช - ม | 4 [36]   |
|     |   | ม       | ท       | ด       | ช ล     | ท ร     | ท ล     | ช       | ท       |          |
| 2.1 |   | - - - ล | - ท ท   | - - - ร | - ท ท   | - ช -   | ล ท - ร | - ม - ร | - ท - ล | 5 [37]   |
|     |   | ล       | ท       | ร       | ท       | ร ช     | ร       | ม ร     | ท ล     |          |
|     |   | - ท - ร | - ท -   | ล ล -   | ช ช - ม | - ม -   | ร ร -   | ม ม -   | ช ช - ล | 6 [38]   |
|     |   | ท ร     | ท ล     | ช       | ท       | ท ล     | ท       | ช       | ล       |          |
|     |   | - - -   | - ล - ล | - ช ช   | - ล - ท | - ร - ม | - ร -   | ท ท -   | ล ล - ช | 7 [39]   |
|     |   | ล       | ล       | ช       | ล ท     | ร ม     | ร ท     | ล       | ช       |          |
|     |   | - ฟ     | - ม -   | - ร - ร | - - - ช | - ล ล   | - ท - ช | - - ล ท | - ล - ท | 8 [40]   |
|     |   | ม ร     | ร       | ล       | ช       | ล       | ท ช     | ท       | ล ท     |          |
| 3.1 |   | - ท -   | ล ล -   | ท ท -   | ร ร - ม | - ม - ม | - ม -   | ม ม -   | ร ร - ท | 9 [41]   |
|     |   | ท ล     | ท       | ร       | ม       | ช ล     | ช ม     | ร       | ท       |          |
|     |   | - ร - ม | - ร -   | ท ท -   | ล ล - ช | - ล ท   | - ร - ม | - ร - ด | - ท - ล | 10 [42]  |
|     |   | ร ม     | ร ท     | ล       | ช       | ช       | ร ม     | ร ด     | ท ล     |          |
|     |   | - - -   | - ม - ม | - ร ม   | - ช - ล | - ท - ร | - ท -   | ล ล -   | ช ช - ม | 11 [43]  |
|     |   | ม       | ท       | ด       | ช ล     | ท ร     | ท ล     | ช       | ท       |          |
|     |   | - ฟ - ม | - -     | - - -   | - ร - ม | - ท - ล | - ช - ม | - ร ม   | - ช - ล | 12 [44]  |
|     |   |         | ร ท     | ล ท     | ล ท     | ท ล     | ช ท     | ด       | ช ล     |          |
| 4.1 |   | - ร - ม | - ร -   | ท ท -   | ล ล - ช | - ล ท   | - ร - ม | - ร - ด | - ท - ล | 13 [45]  |
|     |   | ร ม     | ร ท     | ล       | ช       | ช       | ร ม     | ร ด     | ท ล     |          |
|     |   | - - -   | - ม - ม | - ร ม   | - ช - ล | - ท - ร | - ท -   | ล ล -   | ช ช - ม | 14 [46]  |
|     |   | ม       | ท       | ด       | ช ล     | ท ร     | ท ล     | ช       | ท       |          |
|     |   | - - -   | - ล - ล | - ฟ ฟ   | - ช - ล | - - ร   | - ม ฟ   | - ท     | ล ฟ     | 15 [47]  |
|     |   | ล       | ล       | ฟ       | ช ล     | ล       | ร       | ล ฟ     | ม ร     |          |
|     |   | - ล ล   | - ท - ช | - ล - ท | - ด - ร | - -     | - ม - ร | - - -   | ร ม - ช | 16 [48]  |
|     |   | ล       | ท ช     | ล ท     | ด ร     | ล ท     | ล       | ท ด     | ช       |          |
| 1.2 |   | - ม -   | ร ร -   | ช ช -   | ล ล - ท | - ร - ม | - ร -   | ท ท -   | ล ล - ช | 17 [49]  |
|     |   | ท ล     | ช       | ล       | ท       | ร ม     | ร ท     | ล       | ช       |          |
|     |   | - ม ฟ   | - ล -   | - ฟ - ม | - -     | - ท -   | ล ล -   | ท ท -   | ร ร - ม | 18 [50*] |
|     |   | ร       | ม       |         | ร ท     | ฟ ม     | ฟ       | ร       | ม       |          |

|     |  |         |         |         |         |         |         |         |         |       |
|-----|--|---------|---------|---------|---------|---------|---------|---------|---------|-------|
| 2.2 |  | - ฟ     | - ม -   | - ร - ร | - - ช   | - ล ล   | - ท - ช | - - ล ท | - ล - ท | 19    |
|     |  | ม ร     | ร       | ล       | ช       | ล       | ท ช     | ท       | ล ท     |       |
|     |  | - ล ท   | - ร - ม | - ม - ม | - ร - ท | - ร - ม | - ร -   | ท ท -   | ล ล - ช | 20    |
|     |  | ช       | ร ม     | ช ม     | ร ท     | ร ม     | ร ท     | ล       | ช       |       |
|     |  | - - -   | - ช - ช | - ท -   | - ล - ล | - ช -   | ล ท - ร | - ม - ร | - ท - ล | 21    |
|     |  | ช       | ช       | ท ล     | ล       | ร ช     | ร       | ม ร     | ท ล     |       |
|     |  | - - ร   | - ม ฟ   | - ท     | ล ฟ     | - ด     | - ท - ร | - - -   | ร ม - ช | 22    |
|     |  | ล       | ร       | ล ฟ     | ม ร     | ท ล     | ล       | ท ด     | ช       |       |
|     |  | - ร ม   | - ช - ล | - ท - ล | - ช - ม | - ม -   | ร ร -   | ม ม -   | ช ช - ล | 23    |
|     |  | ด       | ช ล     | ท ล     | ช ท     | ท ล     | ท       | ช       | ล       |       |
| 3.2 |  | - ร - ท | - ล - ช | - ล -   | ท ท - ล | - - - ร | - - ด   | - - - ท | - - ทท  | 24    |
|     |  | ร ท     | ล ช     | ล ท     | ล       | ล       | ทล      | ฟ       | ท       |       |
|     |  | - ท -   | ล ล -   | ท ท -   | ร ร - ม | - ม ฟ   | - ล -   | - ฟ - ม | - -     | 25    |
|     |  | ฟ ม     | ฟ       | ร       | ม       | ร       | ม       |         | ร ท     |       |
|     |  | - ด     | - ฟ     | - - ร   | - ม ฟ   | - ล - ท | - ล -   | ฟ ฟ -   | ม ม - ร | 26    |
|     |  | ท ล     | ม ร     | ล       | ร       | ล ท     | ล ฟ     | ม       | ร       |       |
|     |  | - ล ล   | - ท - ช | - ล - ท | - ด - ร | - ด     | - ฟ     | - - ร   | - ม ฟ   | 27    |
|     |  | ล       | ท ช     | ล ท     | ด ร     | ท ล     | ม ร     | ล       | ร       |       |
|     |  | - ม ฟ   | - ล - ท | - ร - ท | - ล - ฟ | - ล - ท | - ล -   | ฟ ฟ -   | ม ม - ร | 28    |
|     |  | ร       | ล ท     | ร ท     | ล ฟ     | ล ท     | ล ฟ     | ม       | ร       |       |
| 4.2 |  | - ท -   | ล ล -   | ท ท -   | ร ร - ม | - ม ฟ   | - ล -   | - ฟ - ม | - - ท   | 29    |
|     |  | ฟ ม     | ฟ       | ร       | ม       | ร       | ม       |         | ร ท     |       |
|     |  | - - -   | - ท - ท | - ช ช   | - ล - ท | - ฟ - ม | - -     | - - -   | - ร - ม | 30    |
|     |  | ท       | ท       | ช       | ล ท     |         | ร ท     | ล ท     | ล ท     |       |
|     |  | - ร - ม | - ร -   | ท ท -   | ล ล - ช | - ล ท   | - ร - ม | - ร - ด | - ท - ล | 31    |
|     |  | ร ม     | ร ท     | ล       | ช       | ช       | ร ม     | ร ด     | ท ล     |       |
|     |  | - - -   | - ม - ม | - ร ม   | - ช - ล | - ร - ท | - ล -   | ฟ ฟ -   | ม ม - ร | 32 :) |
|     |  | ม       | ท       | ด       | ช ล     | ร ท     | ล ฟ     | ม       | ร       |       |
|     |  | *Coda   |         |         |         |         |         |         |         |       |
|     |  | - ท -   | ท ท - ร | - ม - ร | - ท - ล | - ท - ร | - ท -   | ล ล -   | ช ช - ม | 33    |
|     |  | ท ท     | ร       | ม ร     | ท ล     | ท ร     | ท ล     | ช       | ท       |       |
|     |  | - ฟ - ม | - -     | - - -   | - ร - ม | - ท - ล | - ช - ม | - ร ม   | - ช - ล | 34    |
|     |  |         | ร ท     | ล ท     | ล ท     | ท ล     | ช ท     | ด       | ช ล     |       |
|     |  | - ร - ม | - ร -   | ท ท -   | ล ล - ช | - ล ท   | - ร - ม | - ร - ด | - ท - ล | 35    |
|     |  | ร ม     | ร ท     | ล       | ช       | ช       | ร ม     | ร ด     | ท ล     |       |
|     |  | - - - ร | - - - ม | - - - ช | - - - ล | - ร - ท | - ล - ฟ | - - - ม | - - - ร | 36 // |
|     |  | ล       | ท       | ช       | ล       | ร ท     | ล ด     | ท       | ล       |       |

## Sadhukarn

## Intro.

### Rasi Phumthongsuk (TR)

|     |   |   |   |   |   |   |   |   |   |   |   |   |   |   |   |   |   |   |   |   |   |   |   |   |   |   |   |   |   |   |   |   |        |         |          |   |        |
|-----|---|---|---|---|---|---|---|---|---|---|---|---|---|---|---|---|---|---|---|---|---|---|---|---|---|---|---|---|---|---|---|---|--------|---------|----------|---|--------|
|     | R | - | - | - | ร | - | - | - | ม | - | - | - | ม | - | ช | - | ด | - | - | - | - | ด | - | ด | - | - | - | ช | - | - | - | ร | 0      |         |          |   |        |
|     | F |   |   |   | ด |   |   |   | ท |   |   |   | ม |   | ช |   | ด |   |   |   | ด |   |   |   |   |   |   | ช |   |   | ด |   |        |         |          |   |        |
| 1.1 |   | - | - | - | ท | - | ด | - |   | ร | ร | - |   | ม | ม | - | พ | - | ด | - | ท | - | ด | - |   | พ | พ | - |   | ม | ม | - | ร      | 1 [33]  |          |   |        |
|     |   |   |   |   | พ |   |   |   | ม |   |   |   | ร |   |   |   | พ |   | ด |   | ท |   | ด |   | พ |   |   |   | ม |   |   | ร |        |         |          |   |        |
|     |   | - |   | ร | ม | - | ช | - | ด | - | ท | - | ด | - | ช | - | ม | - |   | - |   | - | ร | ม | - |   | - | ม | - | ช | - | ด | 2 [34] |         |          |   |        |
|     |   |   | ด |   |   |   | ช |   | ด |   | ท |   | ด |   | ช |   | ท |   | ด |   | ท |   | ด |   | ด |   |   | ม |   | ช |   | ด |        |         |          |   |        |
|     |   | - | ด | - | ม | - | ร | - |   | ท | ท | - |   | ด | ด | - | ช | - | ร | - | ช | - | - | ด | ท | - | ด | - |   | ท | ท | - | ด      | 3 [35]  |          |   |        |
|     |   |   | ม |   | ม |   | ร |   | ท |   |   |   | ด |   |   |   | ช |   | ด |   | ช |   |   |   | ท |   | ด |   | ท |   | ด |   | ด      |         |          |   |        |
|     |   | - | ม | - |   | ม | ร | - |   | ม | ม | - |   | ช | ช | - | ด | - | ท | - | ร | - |   | ท | - |   | ด | ด | - |   | ช | ช | -      | ม       | 4 [36]   |   |        |
|     |   |   | ร |   | ท |   |   |   | ท |   |   |   | ช |   |   |   | ด |   | ท |   | ร |   | ท |   | ด |   |   | ช |   |   | ท |   | ท      |         |          |   |        |
| 2.1 |   | - | ท | - | ด | - |   | ท | ท | - | - | ท | ร | - |   | ท | ท | - | ช | - | - |   | ด | ท | - | ร | - | ม | - | ร | - | ท | -      | ด       | 5 [37]   |   |        |
|     |   |   | ท |   | ด |   |   | ท |   |   |   | ร |   | ท |   |   |   |   | ร |   | ช |   |   | ร |   |   | ม |   | ร |   | ท |   | ด      |         |          |   |        |
|     |   | - | ท | - | ร | - |   | ท | - |   | ด | ด | - |   | ช | ช | - | ม | - |   | - |   | - | ร | ม | - |   | - | ม | - | ช | - | ด      | 6 [38]  |          |   |        |
|     |   |   | ท |   | ร |   | ท |   | ด |   |   |   | ช |   |   |   | ท |   | ด |   | ท |   | ด |   | ด |   |   | ม |   |   | ช |   | ด      |         |          |   |        |
|     |   | - | - | - | ม | - | ร | - |   | ช | ช | - |   | ด | ด | - | ท | - | ร | - | ม | - | ร | - | ม | - | ร | - | ท | ท | - |   | ด      | ด       | -        | ช | 7 [39] |
|     |   |   |   |   | ท |   | ด |   | ช |   |   |   | ด |   |   |   | ท |   | ร |   | ม |   | ร |   | ท |   |   | ด |   |   |   | ด |        | ช       |          |   |        |
|     |   | - |   | พ |   | - | ม | - |   | - | ร | - | ร | - |   | - | ช | - |   | ด | ด | - | ท | - |   | ช | ช | - |   | ด | ด | - | ท      | 8 [40]  |          |   |        |
|     |   |   |   | ม | ร |   |   |   | ร |   |   |   | ด |   | ช |   |   |   | ด |   |   |   | ท |   | ช |   |   | ด |   |   | ท |   | ท      |         |          |   |        |
| 3.1 |   | - | ท | - |   | ด | ด | - |   | ท | ท | - |   | ร | ร | - | ม | พ | - | ด | - |   | - | ด | - | พ |   | - | ด | - | พ |   | -      | ท       | 9 [41]   |   |        |
|     |   |   | ท |   | ด |   |   | ท |   |   |   | ร |   | ม |   | ร |   |   |   | ม |   |   |   | ม |   | ร |   |   | ม | ร |   | ท |        | ท       |          |   |        |
|     |   | - | ท | - | ม | - | ร | - |   | ท | ท | - |   | ด | ด | - | ช | - | ร | - | ช | - | - | ด | ท | - | ด | - |   | ท | ท | - | ด      | 10 [42] |          |   |        |
|     |   |   | พ |   | ม |   | ร |   | ท |   |   |   | ด |   |   |   | ช |   | ด |   | ช |   |   |   | ท |   | ด |   | ท |   | ด |   | ด      |         |          |   |        |
|     |   | - | ม | - |   | ม | ร | - | ม | - | ด | - |   | ช | ช | - | ด | - | ท | - | ร | - |   | ท | - |   | ด | ด | - |   | ช | ช | -      | ม       | 11 [43]  |   |        |
|     |   |   | ร |   | ท |   | ด |   | ท |   | ด |   | ช |   |   |   | ด |   | ท |   | ร |   | ท |   | ด |   |   | ช |   |   | ท |   | ท      |         |          |   |        |
|     |   | - | พ | - | ม | - | ร | - | ด |   | - |   | - | ร | ม | - | ท | - | ด | - | ช | - | ม | - | ร | ม | - | ช | - | ด |   |   |        |         | 12 [44]  |   |        |
|     |   |   |   |   | ด |   |   | ท | ด |   | ท |   | ด |   |   |   | ท |   | ด |   | ช |   | ท |   | ด |   |   | ช |   |   |   |   |        |         |          |   |        |
| 4.1 |   | - | ด | - | ม | - | ร | - |   | ท | ท | - |   | ด | ด | - | ช | - | ร | - | ช | - | - | ด | ท | - | ด | - |   | ท | ท | - | ด      | 13 [45] |          |   |        |
|     |   |   | ม |   | ม |   | ร |   | ท |   |   |   | ด |   |   |   | ช |   | ด |   | ช |   |   |   | ท |   | ด |   | ท |   | ด |   | ด      |         |          |   |        |
|     |   | - | ม | - |   | ม | ร | - | ม | - | ด | - |   | ช | ช | - | ด | - | ท | - | ร | - |   | ท | - |   | ด | ด | - |   | ช | ช | -      | ม       | 14 [46]  |   |        |
|     |   |   | ร |   | ท |   | ด |   | ท |   | ด |   | ช |   |   |   | ด |   | ท |   | ร |   | ท |   | ด |   |   | ช |   |   | ท |   | ท      |         |          |   |        |
|     |   | - | - | ด | ช | - |   | ด | ด | - | - | ด | ท | - |   | ด | ด | - | ร | - | ท | - | ด | - |   | พ | พ | - |   | ม | ม | - | ร      | 15 [47] |          |   |        |
|     |   |   | ด |   | ช |   | ด |   |   |   | ท |   | ด |   | ร |   | ท |   | ด |   | พ |   | ด |   | พ |   |   | ม |   |   |   | ร |        | ร       |          |   |        |
|     |   | - | ท |   |   | - | - | ช | - |   | ด | ท | - | ด | - | ร |   |   |   |   | ช |   |   | - | ร | - |   | - |   | ร | ม | - | ช      | 16 [48] |          |   |        |
|     |   |   | ด |   | ช |   | ร |   |   | ช |   |   |   |   |   | ม | ร |   | ท |   | ด |   | ท |   | ด |   |   |   |   |   |   |   | ช      |         |          |   |        |
| 1.2 |   | - | - | - | ม | - | ร | - |   | ช | ช | - |   | ด | ด | - | ท | - | - | - | ม | - | ร | - |   | ท | ท | - |   | ด | ด | - | ช      | 17 [49] |          |   |        |
|     |   |   |   |   | ท |   | ด |   | ช |   |   |   | ด |   |   |   | ท |   | ม |   | ร |   | ท |   |   | ด |   |   |   |   |   | ช |        |         |          |   |        |
|     |   | - |   | ม | พ | - | ด | - | - | - | ด | - | พ |   | - |   |   |   | - | ท | - |   | ด | ด | - |   | ท | ท | - |   | ร | ร | -      | ม       | 18 [50*] |   |        |
|     |   |   |   | ร |   |   |   | ม | ร |   | ม | ร | ท |   | พ |   | ม |   |   |   | พ |   |   |   |   |   | ร |   |   |   |   |   | ม      |         |          |   |        |

|     |  |         |         |         |         |         |         |         |         |       |
|-----|--|---------|---------|---------|---------|---------|---------|---------|---------|-------|
| 2.2 |  | - ฟ     | - ม -   | - ร - ร | - ช ช   | - ล ล   | - ท -   | ช ช -   | ล ล - ท | 19    |
|     |  | ม ร     | ร       | ล       | ช       | ล       | ท ช     | ล       | ท       |       |
|     |  | - ล ท   | - ร - ม | - ม - ม | - ร - ท | - ร - ม | - ร -   | ท ท -   | ล ล - ช | 20    |
|     |  | ช       | ร ม     | ช ม     | ร ท     | ร ม     | ร ท     | ล       | ช       |       |
|     |  | - ม -   | ร ร -   | ม ม -   | ช ช - ล | - ม -   | ม ม -   | ร ร -   | ท ท - ล | 21    |
|     |  | ท ล     | ท       | ช       | ล       | ม ม     | ร       | ท       | ล       |       |
|     |  | - - ร   | - ม ฟ   | - ท     | ล ฟ     | ม ช ม   | - ร -   | - -     | ร ม - ช | 22    |
|     |  | ล       | ร       | ล ฟ     | ม ร     | ร       | ร ท ล   | ท ค     | ช       |       |
|     |  | - ร ม   | - ช - ล | - ท - ล | - ช - ม | - ม -   | ม ร -   | ม ม -   | ช ช - ล | 23    |
|     |  | ค       | ช ล     | ท ล     | ช ท     | ร ท     | ล ท     | ช       | ล       |       |
| 3.2 |  | - ท - ล | - ช - ม | - ร ม   | - ช - ล | - - - ร | - - ค   | - - - ท | - - ทท  | 24    |
|     |  | ท ล     | ช ท     | ค       | ช ล     | ล       | ทล      | ฟ       | ท       |       |
|     |  | - ท -   | ล ล -   | ท ท -   | ร ร - ม | - ม ฟ   | - ล - - | - ล - ฟ | -       | 25    |
|     |  | ฟ ม     | ฟ       | ร       | ม       | ร       | ม       | ร       | ม ร ท   |       |
|     |  | - ค     | - ฟ     | - - ร   | - ม ฟ   | - ล - ท | - ล -   | ฟ ฟ -   | ม ม - ร | 26    |
|     |  | ท ล     | ม ร     | ล       | ร       | ล ท     | ล ฟ     | ม       | ร       |       |
|     |  | - - ล   | - ท - ช | - ล - ท | - ค - ร | - - - ฟ | ฟ ล ล   | - - ร   | - ม ฟ   | 27    |
|     |  | ล       | ท ช     | ล ท     | ค ร     |         | ม       | ร       | ล       |       |
|     |  | - ม ฟ   | - ล - ท | - ร - ท | - ล - ฟ | - - ร   | - ม ฟ   | - ท     | ล ฟ     | 28    |
|     |  | ร       | ล ท     | ร ท     | ล ฟ     | ล       | ร       | ล ฟ     | ม ร     |       |
| 4.2 |  | - - - ร | - ม ฟ   | - - ฟ   | - ช - ม | - ม ฟ   | - ล -   | - ล - ฟ | -       | 29    |
|     |  | ล       | ร       | ม       |         | ร       | ม       | ร       | ม ร ท   |       |
|     |  | - ร - ร | - ท     | - - ช   | - ล ท   | - ฟ - ม | - ร - ค | -       | - ร ม   | 30    |
|     |  | ท       | ล ช     | ร       | ช       |         | ล       | ท ล ท   | ค       |       |
|     |  | - - - ม | - ร -   | ท ท -   | ล ล - ช | - ร - ช | - - ล ท | - ล -   | ท ท - ล | 31    |
|     |  | ม       | ร ท     | ล       | ช       | ล ช     | ท       | ล ท     | ล       |       |
|     |  | - ม -   | ม ร - ม | - - - ช | - - - ล | - ร - ท | - ล - ฟ | - - - ม | - - - ร | 32 :) |
|     |  | ร ท     | ท       | ช       | ล       | ร ท     | ล ฟ     | ม       | ร       |       |
|     |  | *Coda   |         |         |         |         |         |         |         |       |
|     |  | - ท -   | ท ท - ร | - ม - ร | - ท - ล | - ท - ร | - ท -   | ล ล -   | ช ช - ม | 33    |
|     |  | ท ท     | ร       | ม ร     | ท ล     | ท ร     | ท ล     | ช       | ท       |       |
|     |  | - ฟ - ม | - -     | - -     | - ร ม   | - ท - ล | - ช - ม | - ร ม   | - ช - ล | 34    |
|     |  |         | ร ท     | ล ท     | ค       | ท ล     | ช ท     | ค       | ช ล     |       |
|     |  | - ล - ม | - ร -   | ท ท -   | ล ล - ช | - ร - ช | - - ล ท | - ล -   | ท ท - ล | 35    |
|     |  | ม ม     | ร ท     | ล       | ช       | ล ช     | ท       | ล ท     | ล       |       |
|     |  | - - - ร | - - - ม | - - - ช | - - - ล | - ม ร ท | - ล - ฟ | - - - ม | - - - ร | 36 // |
|     |  | ล       | ม       | ช       | ล       | ม ร ท   | ล ฟ     | ม       | ร       |       |

# Sadhukarn

Intro.

Siri Nakdontri (TN)

|     |   |         |         |         |         |         |         |         |         |          |
|-----|---|---------|---------|---------|---------|---------|---------|---------|---------|----------|
|     | R | - - - ร | - - - ม | - - - ม | - ช - ล | - - -   | - ล - ล | - - - ช | - - - ร | 0        |
|     | F | ล       | ท       | ม       | ช ล     | ล       |         | ช       | ล       |          |
| 1.1 |   | - - - ล | - - - ร | - - ม ฟ | - ม - ฟ | - ล - ท | - ล -   | ฟ ฟ -   | ม ม - ร | 1 [33]   |
|     |   | ม       | ร       | ฟ       | ม ฟ     | ล ท     | ล ฟ     | ม       | ร       |          |
|     |   | - - -   | - - ล ล | - ท - ล | - ช - ม | - -     | - ร ม   | - ม ม   | - ช - ล | 2 [34]   |
|     |   | ล       |         | ท ล     | ช ท     | ล ท     | ด       | ม       | ช ล     |          |
|     |   | - ร - ม | - ร -   | ท ท -   | ล ล - ช | - ล ท   | - ร - ม | - ร - ด | - ท - ล | 3 [35]   |
|     |   | ร ม     | ร ท     | ล       | ช       | ช       | ร ม     | ร ด     | ท ล     |          |
|     |   | - -     | - ร ม   | - ม ม   | - ช - ล | - ท - ร | - ท -   | ล ล -   | ช ช - ม | 4 [36]   |
|     |   | ล ท     | ด       | ม       | ช ล     | ท ร     | ท ล     | ช       | ท       |          |
| 2.1 |   | - - - ร | - - - ช | - - ล ท | - ล - ท | - ช - - | ล ท - ร | - ม - ร | - ท - ล | 5 [37]   |
|     |   | ล       | ช       | ท       | ล ท     | ร ช     | ร       | ม ร     | ท ล     |          |
|     |   | - ท - ร | - ท -   | ล ล -   | ช ช - ม | - -     | - ร ม   | - ม ม   | - ช - ล | 6 [38]   |
|     |   | ท ร     | ท ล     | ช       | ท       | ล ท     | ด       | ม       | ช ล     |          |
|     |   | - ร - ท | - ล -   | ช ช -   | ล ล - ท | - ร - ม | - ร -   | ท ท -   | ล ล - ช | 7 [39]   |
|     |   | ร ท     | ล ช     | ล       | ท       | ร ม     | ร ท     | ล       | ช       |          |
|     |   | - ฟ     | - ม -   | - ร - ร | - - - ช | - ล ล - | - ท - ช | - - ล ท | - ล - ท | 8 [40]   |
|     |   | ม ร     | ร       | ล       | ช       | ล       | ท ช     | ท       | ล ท     |          |
| 3.1 |   | - ท -   | ล ล -   | ท ท -   | ร ร - ม | - - ม ฟ | - ล -   | - ฟ - ม | - - ท   | 9 [41]   |
|     |   | ท ล     | ท       | ร       | ม       | ร       | ม       |         | ร ท     |          |
|     |   | - ร - ม | - ร -   | ท ท -   | ล ล - ช | - ล ท   | - ร - ม | - ร - ด | - ท - ล | 10 [42]  |
|     |   | ร ม     | ร ท     | ล       | ช       | ช       | ร ม     | ร ด     | ท ล     |          |
|     |   | - -     | - ร ม   | - ม ม   | - ช - ล | - ท - ร | - ท -   | ล ล -   | ช ช - ม | 11 [43]  |
|     |   | ล ท     | ด       | ม       | ช ล     | ท ร     | ท ล     | ช       | ท       |          |
|     |   | - ฟ - ม | - ม -   | - - -   | - ร - ม | - ท - ล | - ช - ม | - ร ม   | - ช - ล | 12 [44]  |
|     |   |         | ร ท     | ล ท     | ล ท     | ท ล     | ช ท     | ด       | ช ล     |          |
| 4.1 |   | - ร - ม | - ร -   | ท ท -   | ล ล - ช | - ล ท   | - ร - ม | - ร - ด | - ท - ล | 13 [45]  |
|     |   | ร ม     | ร ท     | ล       | ช       | ช       | ร ม     | ร ด     | ท ล     |          |
|     |   | - -     | - ร ม   | - ม ม   | - ช - ล | - ท - ร | - ท -   | ล ล -   | ช ช - ม | 14 [46]  |
|     |   | ล ท     | ด       | ม       | ช ล     | ท ร     | ท ล     | ช       | ท       |          |
|     |   | - - -   | - ล - ล | - ล -   | ช ช - ล | - ล - ท | - ล -   | ฟ ฟ -   | ม ม - ร | 15 [47]  |
|     |   | ล       | ล       | ล ช     | ล       | ล ท     | ล ฟ     | ม       | ร       |          |
|     |   | - ช ช   | - ร - ช | - ล - ท | - ด - ร | - ร - ม | - ร -   | ท ท -   | ล ล - ช | 16 [48]  |
|     |   | ช       | ล ช     | ล ท     | ด ร     | ร ม     | ร ท     | ล       | ช       |          |
| 1.2 |   | - - - ร | - - - ช | - - ล ท | - ล - ท | - ร - ม | - ร -   | ท ท -   | ล ล - ช | 17 [49]  |
|     |   | ล       | ช       | ท       | ล ท     | ร ม     | ร ท     | ล       | ช       |          |
|     |   | - ม ฟ   | - ล - - | - ฟ - ม | - -     | - ร -   | - ร -   | - ม - ร | - - - ม | 18 [50*] |
|     |   | ร       | ม       |         | ร ท     | ล       | ท       | ล       | ท       |          |



|              |             |             |             |            |            |             |             |             |       |
|--------------|-------------|-------------|-------------|------------|------------|-------------|-------------|-------------|-------|
|              | - ช ช -     | - ล - รุ -  | - - -       | ร ม - ช -  | - ล ล -    | - ท -       | ช ช -       | ล ล - ท     | 19    |
|              | ช           | ล           | ทุ ด        | ช          | ลู         | ท ช         | ลู          | ทุ          |       |
|              | - ล ท -     | - รุ - มี - | มี - มี -   | รุ - ท -   | รุ - มี -  | รุ -        | ท ท -       | ล ล - ช     | 20    |
|              | ช           | ร ม         | ช ม         | ร ทุ       | ร ม        | ร ทุ        | ลู          | ช           |       |
| 2.2          | - - - ช -   | - - -       | - - -       | - ล - ล -  | - ช -      | ล ท - รุ -  | มี - รุ -   | - ท - ล     | 21    |
|              | ด           | ช           | ลู          | ร ช        | ร          | ม ร         | ทุ ล        |             |       |
|              | - - ร -     | - - ม ฟ -   | - ล - ล -   | - ฟ        | - ด        | - ท - ร -   | - - -       | ร ม - ช     | 22    |
|              | ลู          | ร           | ฟ           | ม ร        | ทุ ล       | ทุ ด        | ช           |             |       |
|              | - - -       | - - ล ล -   | - ท - ล -   | - ช - ม -  | - -        | - ร ม -     | - ม ม -     | - ช - ล     | 23    |
|              | ลู          | ทุ ล        | ช ทุ        | ทุ         | ค          | ม           | ช ลู        |             |       |
|              | - ท - ล -   | - ช - ม -   | - ร ม -     | - ช - ล -  | - - - ร -  | - - ด       | - - - ทุ -  | - - ทุ ทุ - | 24    |
|              | ทุ ล        | ช ทุ        | ค           | ช ลู       | ลู         | ทุ ล        | ทุ          | ทุ          |       |
| 3.2          | - ทุ -      | ลู ล -      | ทุ ทุ -     | ร ร - ม -  | - ม ฟ -    | - ล - -     | - ฟ -       | - -         | 25    |
|              | ฟู ม        | ฟู          | รู          | ม ร        | ร          | ม           | ม           | ร ทุ        |       |
|              | - - -       | - ฟ - ฟ -   | - ร ร -     | - ม - ฟ -  | - ล - ท -  | - ล -       | ฟ ฟ -       | ม ม - ร     | 26    |
|              | ฟู          | รู          | ม ฟู        | ลู ทุ      | ลู ฟู      | ม           | รู          |             |       |
|              | - ม - ร -   | - ด         | - ล -       | ลู ท - ร - | - ม ม -    | - ฟ - ร -   | - - ม ฟ -   | - ม - ฟ -   | 27    |
|              | ลู          | ทุ ล        | ฟู ช        | รู         | ม          | ฟู ร        | ฟู          | ม ฟู        |       |
|              | - ม ฟ -     | - ล - ท -   | - รุ - ท -  | - ล - ฟ -  | - ล - ท -  | - ล -       | ฟ ฟ -       | ม ม - ร     | 28    |
|              | ร           | ลู ทุ       | ร ทุ        | ลู ค       | ลู ทุ      | ลู ฟู       | ม           | รู          |       |
| 4.2          | - ทุ -      | ลู ล -      | ทุ ทุ -     | ร ร - ม -  | - ม ฟ -    | - ล - -     | - ฟ -       | - - ท       | 29    |
|              | ฟู ม        | ฟู          | รู          | ม ร        | ร          | ม           | ม           | ร ทุ        |       |
|              | - รุ - ท -  | - ล -       | ช ช -       | ล ล - ท -  | - ฟ - ม -  | - ม -       | - -         | - ร - ม     | 30    |
|              | ร ทุ        | ลู ช        | ลู          | ทุ         | ร ทุ       | ลู ทุ       | ลู ทุ       | ลู ทุ       |       |
|              | - รุ - มี - | - รุ -      | ท ท -       | ล ล - ช -  | - ล ท -    | - รุ - มี - | - รุ - คิ - | - ท - ล     | 31    |
|              | ร ม         | ร ทุ        | ลู          | ช          | ช          | ร ม         | ร ค         | ทุ ล        |       |
|              | - - - ร -   | - - - ม -   | - - - ช -   | - - - ล -  | - รุ - ท - | - ล - ฟ -   | - - - ม -   | - - - ร -   | 32 :) |
|              | ลู          | ม           | ช           | ลู         | ร ทุ       | ลู ฟู       | ม           | รู          |       |
| <b>*Coda</b> |             |             |             |            |            |             |             |             |       |
|              | - ท ท -     | - ท ท -     | - มี - รุ - | - ท - ล -  | - ท - รุ - | - ท -       | ล ล -       | ช ช - ม     | 33    |
|              | ทุ          | ทุ          | ม ร         | ทุ ล       | ทุ ร       | ทุ ล        | ช           | ทุ          |       |
|              | - ฟ - ม -   | - ม -       | - - -       | - ร - ม -  | - ท - ล -  | - ช - ม -   | - ร ม -     | - ช - ล     | 34    |
|              | ร ทุ        | ลู ทุ       | ลู ทุ       | ทุ ล       | ช ทุ       | ค           | ช ลู        |             |       |
|              | - รุ - มี - | - รุ -      | ท ท -       | ล ล - ช -  | - ล ท -    | - รุ - มี - | - รุ - คิ - | - ท - ล     | 35    |
|              | ร ม         | ร ทุ        | ลู          | ช          | ช          | ร ม         | ร ค         | ทุ ล        |       |
|              | - - - ร -   | - - - ม -   | - - - ช -   | - - - ล -  | - รุ - ท - | - ล - ฟ -   | - - - ม -   | - - - ร -   | 36 // |
|              | ลู          | ม           | ช           | ลู         | ร ทุ       | ลู ฟู       | ม           | รู          |       |

# Sadhukarn

Intro.

Sangobsuek Dhamvihar (TW)

|     |   |         |         |         |         |         |         |         |           |          |
|-----|---|---------|---------|---------|---------|---------|---------|---------|-----------|----------|
|     | R | - - - ฐ | - - - ม | - - - ม | - ช - ล | - ล - ล | - ล -   | ล ล -   | ช ช - ฐ   | 0        |
|     | F | ล       | ท       | ม       | ช ล     | ฐ ม     | ฐ ล     | ช       | ล         |          |
| 1.1 |   | - - - ฑ | - ล -   | ฐ ฐ -   | ม ม - ฬ | - ล - ท | - ล -   | ฬ ฬ -   | ม ม - ฐ   | 1 [33]   |
|     |   | ฬ       | ม ฐ     | ม       | ฬ       | ล ท     | ล ฬ     | ม       | ฐ         |          |
|     |   | - ฬ - ม | - ฐ - ล | -       | - ฐ ม   | - ล ล   | - ท - ล | - ช - ม | - ช - ล   | 2 [34]   |
|     |   |         | ล       | ท ล ท   | ล       | ล       | ท ล     | ช ท     | ช ล       |          |
|     |   | - ฐ - ม | - ฐ -   | ท ท -   | ล ล - ช | - ล ท   | - ฐ - ม | - ฐ - ล | - ท - ล   | 3 [35]   |
|     |   | ฐ ม     | ฐ ท     | ล       | ช       | ช       | ฐ ม     | ฐ ล     | ท ล       |          |
|     |   | - ม -   | ม ฐ - ม | - ล -   | ช ช - ล | - ท - ฐ | - ท -   | ล ล -   | ช ช - ม   | 4 [36]   |
|     |   | ฐ ท     | ล ท     | ล ช     | ล       | ท ฐ     | ท ล     | ช       | ท         |          |
| 2.1 |   | - ฬ     | - ม -   | - ฐ - ฐ | - ท ท   | - ช - - | ล ท - ฐ | - ม - ฐ | - ท - ล   | 5 [37]   |
|     |   | ม ฐ     | ฐ       |         | ท       | ฐ ช     | ฐ       | ม ฐ     | ท ล       |          |
|     |   | - ท - ฐ | - ท -   | ล ล -   | ช ช - ม | - ม -   | ม ฐ - ม | - ล -   | ช ช - ล   | 6 [38]   |
|     |   | ท ฐ     | ท ล     | ช       | ท       | ฐ ท     | ล ท     | ล ช     | ล         |          |
|     |   | - ท ล ล | - ล ล   | - ฐ - ช | - - ล ท | - ฐ - ม | - ฐ -   | ท ท -   | ล ล - ช   | 7 [39]   |
|     |   | ฐ       | ล       | ล ช     | ท       | ฐ ม     | ฐ ท     | ล       | ช         |          |
|     |   | - ฬ     | - ม -   | - ฐ - ฐ | - - - ช | - ล ล   | - ท -   | ช ช -   | ล ล - ท   | 8 [40]   |
|     |   | ม ฐ     | ฐ       | ล       | ช ล     | ท ช     | ล       | ล       | ท         |          |
| 3.1 |   | - ท -   | ล ล -   | ท ท -   | ฐ ฐ - ม | - ม ฬ   | - ล -   | - ล - ฬ | - ท       | 9 [41]   |
|     |   | ท ล     | ท       | ฐ       | ม       | ฐ       | ม       | ฐ       | ม ฐ ท     |          |
|     |   | - ฐ - ม | - ฐ -   | ท ท -   | ล ล - ช | - ล ท   | - ฐ - ม | - ฐ - ล | - ท - ล   | 10 [42]  |
|     |   | ฐ ม     | ฐ ท     | ล       | ช       | ช       | ฐ ม     | ฐ ล     | ท ล       |          |
|     |   | - ม -   | ม ฐ - ม | - ล -   | ช ช - ล | - ท - ฐ | - ท -   | ล ล -   | ช ช - ม   | 11 [43]  |
|     |   | ฐ ท     | ล ท     | ล ช     | ล       | ท ฐ     | ท ล     | ช       | ท         |          |
|     |   | - ฬ - ม | - ฐ - ล | -       | - ฐ ม   | - ล ล   | - ท - ล | - ช - ม | - ช - ล   | 12 [44]  |
|     |   |         | ล       | ท ล ท   | ล       | ล       | ท ล     | ช ท     | ช ล       |          |
| 4.1 |   | - ฐ - ม | - ฐ -   | ท ท -   | ล ล - ช | - - ล ท | - ฐ - ม | - ฐ - ล | - ท - ล   | 13 [45]  |
|     |   | ฐ ม     | ฐ ท     | ล       | ช       | ช       | ฐ ม     | ฐ ล     | ท ล       |          |
|     |   | - ม -   | ม ฐ - ม | - ล -   | ช ช - ล | - ท - ฐ | - ท -   | ล ล -   | ช ช - ม   | 14 [46]  |
|     |   | ฐ ท     | ล ท     | ล ช     | ล       | ท ฐ     | ท ล     | ช       | ท         |          |
|     |   | - ล ล   | - ล ล   | - ล -   | ช ช - ล | - ท ท   | - ล -   | ฬ ฬ -   | ม ม - ฐ   | 15 [47]  |
|     |   | ล       | ล       | ล ช     | ล       | ท       | ล ฬ     | ม       | ฐ         |          |
|     |   | - ล ล   | - ท - ช | - ล - ท | - ล - ฐ | - ม ม   | - ฐ -   | ท ท -   | - ล ล - ช | 16 [48]  |
|     |   | ล       | ท ช     | ล ท     | ล ฐ     | ม       | ฐ ท     | ล       | ช         |          |
| 1.2 |   | - ล ช ช | - ช ช   | - ฐ - ช | - ล - ท | - ฐ - ม | - ฐ -   | ท ท -   | ล ล - ช   | 17 [49]  |
|     |   | ล       | ช       | ล ช     | ล ท     | ฐ ม     | ฐ ท     | ล       | ช         |          |
|     |   | - ม ฬ   | - ล -   | - ล - ฬ | -       | - ท -   | ล ล -   | ท ท -   | ฐ ฐ - ม   | 18 [50*] |
|     |   | ฐ       | ม       | ฐ       | ม ฐ ท   | ฬ       | ม ฬ     | ฐ       | ฐ         |          |

|   |   |   |   |   |   |   |   |   |   |   |   |   |   |   |   |   |   |   |   |   |   |   |   |   |   |
|---|---|---|---|---|---|---|---|---|---|---|---|---|---|---|---|---|---|---|---|---|---|---|---|---|---|
| - | ช | ช | - | ด | - | ร | - | - | ร | ม | - | ช | - | ด | ด | - | ท | - | ช | ช | - | ด | ด | - | ท |
| ช |   |   | ด |   | ท | ด |   |   | ช | ด |   |   | ท | ช | ด |   |   |   |   |   |   |   |   |   | ท |

19

|   |   |   |   |   |   |   |   |   |   |   |   |   |   |   |   |   |   |   |   |   |   |   |   |   |   |   |
|---|---|---|---|---|---|---|---|---|---|---|---|---|---|---|---|---|---|---|---|---|---|---|---|---|---|---|
| - | ด | ท | - | ร | - | ม | - | ม | - | ร | - | ท | - | ร | - | ม | - | ร | - | ท | ท | - | ด | ด | - | ช |
| ช |   |   | ร | ม |   | ช | ม |   | ร | ท |   | ร | ม |   | ร | ท |   |   |   |   |   | ด |   |   |   | ช |

20

|   |   |   |   |   |   |   |   |   |   |   |   |   |   |   |   |   |   |   |   |   |   |   |   |   |   |   |   |   |
|---|---|---|---|---|---|---|---|---|---|---|---|---|---|---|---|---|---|---|---|---|---|---|---|---|---|---|---|---|
| - | ม | - | ร | ร | - | ม | ม | - | ช | ช | - | ด | - | ช | - | ด | - | ท | - | ด | - | ม | ร | ด | - | ท | - | ด |
| ท | ด |   |   |   | ท |   | ช |   |   |   | ด |   | ช | ด |   | ท | ด |   | ม | ร | ด |   | ท | ด |   |   |   | ด |

21

|   |   |   |   |   |   |   |   |   |   |   |   |   |  |   |   |  |   |   |   |   |   |   |   |   |   |   |   |   |
|---|---|---|---|---|---|---|---|---|---|---|---|---|--|---|---|--|---|---|---|---|---|---|---|---|---|---|---|---|
| - | - | ร | - | - | ม | พ | - | ด | - | ด | - | พ |  | - | ด |  | - | ท | - | ร | - | - | - | ร | ม | - | ช |   |
| ด |   |   | ร |   |   | พ |   | ม | ร |   | ท | ด |  |   |   |  |   | ท | ด |   |   |   | ท | ด |   |   |   | ช |

22

|   |   |   |   |   |   |   |   |   |   |   |   |   |   |   |   |   |   |   |   |   |   |   |   |   |   |   |   |   |
|---|---|---|---|---|---|---|---|---|---|---|---|---|---|---|---|---|---|---|---|---|---|---|---|---|---|---|---|---|
| - | ร | ม | - | ช | - | ด | - | ท | - | ด | - | ช | - | ม | - | ม | - | ม | ร | - | ม | - | ด | - | ช | ช | - | ด |
| ด |   |   | ช | ด |   | ท | ด |   | ช | ท |   | ร | ท |   | ด | ท |   | ด | ช |   |   |   |   |   |   |   |   | ด |

23

|   |   |   |   |   |   |   |   |   |   |   |   |   |   |   |   |   |   |   |   |   |   |   |   |   |   |   |   |   |
|---|---|---|---|---|---|---|---|---|---|---|---|---|---|---|---|---|---|---|---|---|---|---|---|---|---|---|---|---|
| - | ท | - | ด | - | ช | - | ม | - | ร | ม | - | ช | - | ด | - | - | - | ร | - | - | ด | - | - | - | ท | - | ท | ท |
| ท | ด |   | ช | ท |   | ด |   | ช | ด |   |   |   |   | ด |   | ท |   |   |   |   | ด |   |   | พ |   |   |   | ท |

24

|   |   |   |   |   |   |   |   |   |   |   |   |   |   |   |   |   |   |   |   |   |   |   |   |   |   |   |   |   |
|---|---|---|---|---|---|---|---|---|---|---|---|---|---|---|---|---|---|---|---|---|---|---|---|---|---|---|---|---|
| - | ท | - | ด | ด | - | ท | ท | - | ร | ร | - | ม | - | ม | พ | - | ด | - | - | ด | - | พ |   | - | ด | - | พ |   |
| พ | ม |   |   |   | พ |   | ร |   | ม | ร |   |   |   | ร |   |   | ม | ร |   |   |   |   | ม | ร |   |   |   | ท |

25

|   |   |   |   |   |   |   |   |   |   |   |   |   |   |   |   |   |   |   |   |   |   |   |   |   |   |  |  |   |
|---|---|---|---|---|---|---|---|---|---|---|---|---|---|---|---|---|---|---|---|---|---|---|---|---|---|--|--|---|
| - | ด |   | - | พ |   | - | - | ร | - | ม | พ | - | ด | - | ท | - | ด | - | พ | พ | - | ม | ม | - | ร |  |  |   |
|   | ท | ด |   | ม | ร |   | ด |   | ร |   |   | ด | ท |   | ด | พ |   |   | ม |   |   |   |   |   |   |  |  | ร |

26

|   |   |   |   |   |   |   |   |   |   |   |   |   |   |   |   |   |   |   |   |   |  |   |   |   |   |   |   |   |
|---|---|---|---|---|---|---|---|---|---|---|---|---|---|---|---|---|---|---|---|---|--|---|---|---|---|---|---|---|
| - | ด | ด | - | ท | - | ช | - | ด | - | ท | - | ด | - | ร |   | - | ด |   | - | พ |  | - | - | ร | - | ม | พ |   |
| ด |   |   | ท | ช |   | ด | ท |   | ด | ร |   | ท | ด |   | ม | ร |   | ด |   |   |  |   |   |   |   |   |   | ร |

27

|   |   |   |   |   |   |   |   |   |   |   |   |   |   |   |   |   |   |   |   |   |   |   |   |   |   |   |   |   |   |
|---|---|---|---|---|---|---|---|---|---|---|---|---|---|---|---|---|---|---|---|---|---|---|---|---|---|---|---|---|---|
| - | ม | พ | - | ด | - | ท | - | ร | - | ท | - | ด | - | พ |   | - | ด | - | ท | - | ด | - | พ | พ | - | ม | ม | - | ร |
| ร |   |   | ด | ท |   | ร | ท |   | ด | พ |   | ด | ท |   | ด | พ |   |   |   |   |   |   | ม |   |   |   |   |   | ร |

28

|   |   |   |   |   |   |   |   |   |   |   |   |   |   |   |   |   |   |   |   |   |   |   |   |   |   |   |   |   |
|---|---|---|---|---|---|---|---|---|---|---|---|---|---|---|---|---|---|---|---|---|---|---|---|---|---|---|---|---|
| - | ท | - | ด | ด | - | ท | ท | - | ร | ร | - | ม | - | ม | พ | - | ด | - | - | ด | - | พ |   | - | ด | - | พ |   |
| พ | ม |   |   |   | พ |   | ร |   | ม | ร |   |   |   | ร |   |   | ม | ร |   |   |   |   | ม | ร |   |   |   | ท |

29

|   |   |   |   |   |   |   |   |   |   |   |   |   |   |   |   |   |   |   |   |   |   |   |   |   |   |   |   |  |
|---|---|---|---|---|---|---|---|---|---|---|---|---|---|---|---|---|---|---|---|---|---|---|---|---|---|---|---|--|
| - | ร | - | ท | - | ด | - | ช | ช | - | ด | ด | - | ท | - | พ | - | ม | - | ร | - | ด | - | - | - | - | ร | ม |  |
| ร | ท |   | ด | ช |   |   |   |   | ด |   |   | ท |   |   |   | ด |   | ท | ด |   |   |   |   |   |   |   |   |  |

30

|   |   |   |   |   |   |   |   |   |   |   |   |   |   |   |   |   |   |   |   |   |   |   |   |   |   |   |   |   |   |
|---|---|---|---|---|---|---|---|---|---|---|---|---|---|---|---|---|---|---|---|---|---|---|---|---|---|---|---|---|---|
| - | ร | - | ช | - | ด | ท | - | ร | - | ท | - | ด | - | ช | - | ด | ท | - | ร | - | ม | - | ร | - | ด | - | ท | - | ด |
| ด | ช |   | ด | ท |   | ร | ท |   | ด | ช |   | ช |   |   |   | ร | ม |   | ร | ด |   | ท | ด |   |   |   |   | ด |   |

31

|   |   |   |   |   |   |   |   |   |   |   |   |   |   |   |   |   |   |   |   |   |   |   |   |   |   |   |   |   |
|---|---|---|---|---|---|---|---|---|---|---|---|---|---|---|---|---|---|---|---|---|---|---|---|---|---|---|---|---|
| - | ม | - | ม | ร | - | ม | - | ด | - | ช | ช | - | ด | - | ร | - | ท | - | ด | - | พ | พ | - | ม | ม | - | ร |   |
| ร | ท |   | ด | ท |   | ด | ช |   |   | ร | ท |   | ด | พ |   |   |   |   |   |   |   | ม |   |   |   |   |   | ร |

32

|       |   |   |   |   |   |   |   |   |   |   |   |   |   |   |   |   |   |   |   |   |   |   |   |   |   |   |   |   |   |
|-------|---|---|---|---|---|---|---|---|---|---|---|---|---|---|---|---|---|---|---|---|---|---|---|---|---|---|---|---|---|
| *Coda | - | ท | - | ท | ท | - | ร | - | ม | - | ร | - | ท | - | ด | - | ท | - | ร | - | ท | - | ด | ด | - | ช | ช | - | ม |
|       | ท | ท |   |   |   | ร |   | ม | ร |   | ท | ด |   | ท | ร |   | ท | ด |   |   |   |   |   | ช |   |   |   |   | ท |

51

|   |   |   |   |   |   |   |   |  |   |   |   |   |   |   |   |   |   |   |   |   |   |   |   |   |   |   |  |  |
|---|---|---|---|---|---|---|---|--|---|---|---|---|---|---|---|---|---|---|---|---|---|---|---|---|---|---|--|--|
| - | พ | - | ม | - | ร | - | ด |  | - | ร | ม | - | ด | ด | - | ท | - | ด | - | ช | - | ม | - | ช | - | ด |  |  |
|   |   |   | ด |   | ท | ด | ท |  | ด |   |   |   | ด |   | ท | ด |   | ช | ท |   | ช | ด |   |   |   |   |  |  |

52

|   |   |   |   |   |   |   |   |   |   |   |   |   |   |   |   |   |   |   |   |   |   |   |   |   |   |   |   |   |
|---|---|---|---|---|---|---|---|---|---|---|---|---|---|---|---|---|---|---|---|---|---|---|---|---|---|---|---|---|
| - | ร | - | ม | - | ร | - | ท | ท | - | ด | ด | - | ช | - | ด | ท | - | ร | - | ม | - | ร | - | ด | - | ท | - | ด |
|   | ร | ม |   | ร | ท |   |   |   | ด |   | ช | ช |   |   |   | ร | ม |   | ร | ด |   | ท | ด |   |   |   |   | ด |

53

|   |   |   |   |   |   |   |   |   |   |   |   |   |   |   |   |   |   |   |   |   |   |   |   |   |   |   |   |   |   |   |   |
|---|---|---|---|---|---|---|---|---|---|---|---|---|---|---|---|---|---|---|---|---|---|---|---|---|---|---|---|---|---|---|---|
| - | - | - | ร | - | - | - | ม | - | - | - | ช | - | - | - | ด | - | ม | ร | ท | - | ด | - | พ | - | - | - | ม | - | - | - | ร |
|   |   |   | ด |   |   |   | ท |   | ช |   |   | ด |   | ม | ร | ท |   | ด | พ |   |   |   | ม |   |   |   |   |   |   | ร |   |

54

# Sadhukarn

Intro.

Samran Kerdphol (TS2)

|     |   |   |   |   |   |   |   |   |   |   |   |   |   |   |   |   |   |   |   |   |   |   |   |   |   |   |   |   |        |        |         |          |         |         |
|-----|---|---|---|---|---|---|---|---|---|---|---|---|---|---|---|---|---|---|---|---|---|---|---|---|---|---|---|---|--------|--------|---------|----------|---------|---------|
|     | R | - | - | - | ร | - | - | - | ม | - | - | - | ม | - | ช | - | ล | - | - | - | ล | - | ล | ล | - | ช | ช | - | ร      | 0      |         |          |         |         |
|     | F |   |   |   | ล |   |   |   | ท |   |   |   | ม |   | ช |   | ล |   |   |   | ม |   | ร |   | ล |   | ช |   | ล      |        |         |          |         |         |
| 1.1 |   | - | - | - | ท | - | ล | - | ร | ร | - | ม | ม | - | พ | - | ล | - | ท | - | ล | - | พ | พ | - | ม | ม | - | ร      | 1 [33] |         |          |         |         |
|     |   |   |   |   | พ |   |   |   | ม |   | ร |   |   |   | พ |   | ล |   | ท |   | ล |   | พ |   |   | ม |   |   | ล      |        |         |          |         |         |
|     |   | - | พ | - | ม | - | ร | - | ด |   | - |   | ร | ม | - | - | ช | - | - | ล | ท | - | ล | - | ท | ท | - | ล | 2 [34] |        |         |          |         |         |
|     |   |   |   |   | ล |   |   |   | ท | ล | ท |   | ด |   | ช |   |   |   | ท |   | ล |   | ท |   |   | ล |   |   | ล      |        |         |          |         |         |
|     |   | - | ล | - | ม | - | ร | - | ร |   | - | ท | ท | - | ล | ล | - | ช | - | ร | - | ช | - | - | ล | ท | - | ล | ท      | ท      | -       | ล        | 3 [35]  |         |
|     |   |   |   |   | ม |   | ม |   | ร |   | ท |   |   |   | ล |   | ช |   | ล |   | ช |   |   | ท |   | ล |   | ท |        | ล      |         |          |         |         |
|     |   | - | ม | - |   | ร | ร | - |   | ม | ม | - |   | ช | ช | - | ล | - | ท | ท | - | ท | - | ล | ล | - | ช | ช | -      | ม      | 4 [36]  |          |         |         |
|     |   |   |   |   | ท |   | ล |   |   | ท |   | ช |   |   | ล |   | ท |   | ร |   | ล |   | ช |   |   | ท |   |   | ท      |        |         |          |         |         |
| 2.1 |   | - |   | - | ร | - | ม | - |   | ช | ช | - |   | ล | ล | - | ท | - | ล | ท | - | ร | - | ม | - | ร | - | ด | -      | ท      | -       | ล        | 5 [37]  |         |
|     |   |   |   |   | ท |   | ล |   | ท |   | ช |   |   | ล |   | ท |   | ช |   | ร |   | ม |   | ร |   | ด |   | ท |        | ล      |         |          |         |         |
|     |   | - |   | ท | ท | - | ท | - |   | ล | ล | - |   | ช | ช | - | ม | - | - |   | - | ร | ม | - | ม | ม |   | ช | -      | ล      | 6 [38]  |          |         |         |
|     |   |   |   |   | ท |   |   | ร |   | ล |   | ช |   | ท |   | ล |   | ท |   | ด |   | ม |   |   |   | ช |   | ล |        |        | ล       |          |         |         |
|     |   | - |   | - | ร | - | ม | - |   | ช | ช | - |   | ล | ล | - | ท | - | ร | - | ม | - | ร | - |   | ท | ท | - |        | ล      | ล       | -        | ช       | 7 [39]  |
|     |   |   |   |   | ท |   | ล |   | ท |   | ช |   |   | ล |   | ท |   | ร |   | ม |   | ร |   | ท |   |   | ล |   |        | ล      |         | ช        |         |         |
|     |   | - | พ |   |   | - | ม | - |   | - | ร | - | ร |   | - | - | ช | - |   | ล | ล | - | ท | - | ช | ช | - |   | ล      | ล      | -       | ท        | 8 [40]  |         |
|     |   |   | ม | ร |   |   |   | ร |   |   | ล |   | ช |   | ล |   | ท |   | ช |   | ล |   | ท |   | ช |   |   | ล |        |        | ท       |          |         |         |
| 3.1 |   | - | ท | - |   | ล | ล | - |   | ท | ท | - | ร | ร | - | ม | - | ม | - | ม | - | ม | - | - | ม | ม | - | ร | ร      | -      | ท       | 9 [41]   |         |         |
|     |   |   | ท |   | ล |   |   | ท |   | ร |   |   |   | ม |   | ช |   | ล |   | ช |   | ม |   |   | ร |   |   | ท |        | ท      |         |          |         |         |
|     |   | - | ร | - | ม | - | ร | - |   | ท | ท | - |   | ล | ล | - | ช | - | ร | - | ช | - | - | ล | ท | - | ล | - |        | ท      | ท       | -        | ล       | 10 [42] |
|     |   |   | ร |   | ม |   | ร |   | ท |   |   |   |   | ล |   | ช |   | ล |   | ช |   | ล |   | ช |   |   | ท |   | ล      |        | ล       |          |         |         |
|     |   | - | ม | - |   | ร | ร | - |   | ม | ม | - |   | ช | ช | - | ล | - | ท | ท | - | ท | - | ล | ล | - | ช | ช | -      | ม      | 11 [43] |          |         |         |
|     |   |   | ท |   | ล |   |   | ท |   | ช |   |   |   | ล |   | ท |   | ร |   | ล |   | ช |   |   | ท |   |   | ท |        |        | ท       |          |         |         |
|     |   | - | ล |   |   | ช | ม |   |   | - | - | - | - | ร | - | ม | - |   | ช | ช | - | ล | - | ท | - | ล | - |   | ท      | ท      | -       | ล        | 12 [44] |         |
|     |   |   | ช | ม |   |   | ร | ท |   | ล |   | ท |   | ล |   | ท |   | ช |   | ล |   | ท |   | ล |   | ท |   |   | ล      |        |         | ล        |         |         |
| 4.1 |   | - | - | - | ม | - | ร | - |   | ท | ท | - |   | ล | ล | - | ช | - | ร | - | ช | - | - | ล | ท | - | ล | - |        | ท      | ท       | -        | ล       | 13 [45] |
|     |   |   |   |   | ม |   | ร |   | ท |   |   |   |   | ล |   | ช |   | ล |   | ช |   | ล |   | ท |   | ล |   | ท |        |        | ล       |          |         |         |
|     |   | - | ม | - |   | ร | ร | - |   | ม | ม | - |   | ช | ช | - | ล | - | ท | ท | - | ท | - | ล | ล | - | ช | ช | -      | ม      | 14 [46] |          |         |         |
|     |   |   | ท |   | ล |   |   | ท |   | ช |   |   |   | ล |   | ท |   | ร |   | ล |   | ช |   |   | ท |   |   | ท |        |        | ท       |          |         |         |
|     |   | - | - | ช | ม | - |   | ช | ช | - | - | ช | ล | - | ช | ช | - |   | ล | ล | - | ท | - | ล | - | ช | - | พ | -      | ม      | -       | ร        | 15 [47] |         |
|     |   |   |   |   | ท |   | ช |   |   |   | ล |   | ช |   |   | ล |   | ท |   | ล |   | ท |   | ล |   | ช |   | พ |        | ม      |         | ร        |         |         |
|     |   | - |   | - | ช | - |   | ล | ท | - | - |   | - | ด | - | ร | - | - |   | - | ม | - | ร | - | - |   |   | ร | ม      | -      | ช       | 16 [48]  |         |         |
|     |   |   | ร |   | ช |   |   | ล |   | ท |   |   |   | ล |   | ล |   | ท |   | ล |   | ล |   | ท |   | ด |   |   | ร      | ม      | -       | ช        |         |         |
| 1.2 |   | - | - | - | ร | - | ม | - |   | ช | ช | - |   | ล | ล | - | ท | - | ร | - | ม | - | ร | - |   | ท | ท | - |        | ล      | ล       | -        | ช       | 17 [49] |
|     |   |   |   |   | ล |   | ท |   | ช |   |   |   |   | ล |   | ท |   | ร |   | ม |   | ร |   | ท |   |   | ล |   |        | ล      |         | ช        |         |         |
|     |   | - |   | ม | พ | - | ล | - |   | - | ล | - | พ |   | - |   | - | ท | - |   | ล | ล | - | ท | ท | - |   | ร | ร      | -      | ม       | 18 [50*] |         |         |
|     |   |   |   | ร |   |   | ม |   | ร |   | ม | ร | ท |   | พ |   | ม |   | พ |   |   |   | ร |   |   |   |   |   |        | ม      |         |          |         |         |

|     |  |         |         |         |         |         |         |         |         |    |
|-----|--|---------|---------|---------|---------|---------|---------|---------|---------|----|
| 2.2 |  | - ฝ     | - ม -   | - ร - ร | - - - ช | - ล ล   | - ท -   | ช ช -   | ล ล - ท | 19 |
|     |  | ม ร     | ร       | ล       | ช       | ล       | ท ช     | ล       | ท       |    |
|     |  | - ล ท   | - ร - ม | - ม - ม | - ร - ท | - ร - ม | - ร -   | ท ท -   | ล ล - ช | 20 |
|     |  | ช       | ร ม     | ช ม     | ร ท     | ร ม     | ร ท     | ล       | ช       |    |
|     |  | - - ล ช | - ล ล   | - - ล ท | - ล ล   | - ร -   | ร ร -   | ด ด -   | ท ท - ล | 21 |
|     |  | ช       | ล       | ท       | ล       | ร ร     | ด       | ท       | ล       |    |
|     |  | - - ร   | - - ม ฝ | - ล - ล | - ฝ     | -       | - ม - ร | - -     | ร ม - ช | 22 |
|     |  | ล       | ร       | ฝ       | ม ร     | ล ท     | ล       | ท ด     | ช       |    |
|     |  | - ท -   | ท ท -   | ล ล -   | ช ช -   | ฝ ฝ -   | ม ม -   | ฝ ฝ -   | ช ช - ล | 23 |
|     |  | ท ท     | ล       | ช       | ฝ       | ม       | ฝ       | ช       | ล       |    |
| 3.2 |  | - ร - ม | - ร -   | ท ท     | ล ล - ช | - ร - ร | - ท     | - - ช   | - ล - ท | 24 |
|     |  | ร ม     | ร ท     | ล       | ช       | ท       | ล ช     | ร       | ม ฝ     |    |
|     |  | - ท -   | ล ล -   | ท ท -   | ร ร - ม | - ฝ ฝ   | - ฝ -   | ม ม -   | ร ร - ท | 25 |
|     |  | ท       | ม       | ฝ       | ร       | ฝ       | ล ม     | ร       | ฝ       |    |
|     |  | - ล - ฝ | - ม -   | ร ร -   | ม ม - ฝ | - ล - ท | - ล -   | ฝ ฝ -   | ม ม - ร | 26 |
|     |  | ล ฝ     | ม ร     | ม       | ฝ       | ล ท     | ล ฝ     | ม       | ร       |    |
|     |  | - ล ล   | - ท - ช | - ล - ท | - ด - ร | - ท -   | ล ล - ร | - ด - ท | - ล - ฝ | 27 |
|     |  | ล       | ท ช     | ล ท     | ด ร     | ท ล     | ร       | ด ท     | ล ด     |    |
|     |  | - ม ฝ   | - ล - ท | - ร - ท | - ล - ฝ | - ล - ท | - ล -   | ฝ ฝ -   | ม ม - ร | 28 |
|     |  | ร       | ล ท     | ร ท     | ล ฝ     | ล ท     | ล ฝ     | ม       | ร       |    |
| 4.2 |  | - ฝ - ม | - ร - ด | -       | - ร ม   | - ม ฝ   | - ล -   | - ล - ฝ | -       | 29 |
|     |  |         | ล       | ท ล     | ด       | ร       | ม       | ร       | ม ร ท   |    |
|     |  | - ร - ท | - ล -   | ช ช -   | ล ล - ท | - ฝ - ม | - -     | - - -   | - ร - ม | 30 |
|     |  | ร ท     | ล ช     | ล       | ท       |         | ร ท     | ล ท     | ล ท     |    |
|     |  | - ล - ม | - ร -   | ท ท -   | ล ล - ช | - ร - ช | - ล - ท | - ล -   | ท ท - ล | 31 |
|     |  | ม ม     | ร ท     | ล       | ช       | ล ช     | ล ท     | ล ท     | ล       |    |
|     |  | - ม -   | ร ร -   | ม ม -   | ช ช - ล | - ร ม   | - ช - ล | - ช - ฝ | - ม - ร | 32 |
|     |  | ท ล     | ท       | ช       | ล       | ด       | ช ล     | ช ฝ     | ม ร     |    |
|     |  | *Coda   |         |         |         |         |         |         |         |    |
|     |  | - ท -   | ท ท - ร | - ม - ร | - ท - ล | - ท - ร | - ท -   | ล ล -   | ช ช - ม | 51 |
|     |  | ท ท     | ร       | ม ร     | ท ล     | ท ร     | ท ล     | ช       | ท       |    |
|     |  | - ล     | ช ม     | - - -   | - ร - ม | - ช ช   | - ล - ท | - ล -   | ท ท - ล | 52 |
|     |  | ช ม     | ร ท     | ล ท     | ล ท     | ช       | ล ท     | ล ท     | ล       |    |
|     |  | - ล - ม | - ร -   | ท ท -   | ล ล - ช | - ร - ช | - - ล ท | - ล -   | ท ท - ล | 53 |
|     |  | ม ม     | ร ท     | ล       | ช       | ล ช     | ท       | ล ท     | ล       |    |
|     |  | - ม -   | ร ร -   | ม ม -   | ช ช - ล | - ร ม   | - ช - ล | - ช - ฝ | - ม - ร | 54 |
|     |  | ท ล     | ท       | ช       | ล       | ด       | ช ล     | ช ฝ     | ม ร     |    |

## Sadhukarn

## Intro.

**Subin Chankeaw (TJ)**

|     |   |   |   |   |   |   |   |   |   |   |   |   |   |   |   |   |   |   |   |   |   |   |   |   |   |   |   |   |   |   |         |         |          |         |   |         |
|-----|---|---|---|---|---|---|---|---|---|---|---|---|---|---|---|---|---|---|---|---|---|---|---|---|---|---|---|---|---|---|---------|---------|----------|---------|---|---------|
|     | R | - | - | - | ร | - | - | - | ม | - | - | - | ม | - | ช | - | ด | - | - | - | - | ด | - | ด | - | - | - | ช | - | - | -       | ร       | 0        |         |   |         |
|     | F |   |   |   | ด |   |   |   | ท |   |   |   | ม |   | ช |   | ด |   |   |   | ด |   |   | ด |   |   | ช |   |   |   | ด       |         |          |         |   |         |
| 1.1 |   | - | - | - | ท | - | ด | - |   | ร | ร | - |   | ม | ม | - | พ | - | ด | - | ท | - | ด | - | พ | พ | - |   | ม | ม | -       | ร       | 1 [33]   |         |   |         |
|     |   |   |   |   | พ |   |   |   | ม |   |   |   | ร |   |   |   | พ |   | ด |   | ท |   | ด |   | พ |   |   |   | ม |   |         | ร       |          |         |   |         |
|     |   | - | พ | - | ม | - |   | - |   | - |   | - | - | ร | - | ม | - | - | - | - | ช | - | ช | - | ด | - | ท | ท | - | ด | 2 [34]  |         |          |         |   |         |
|     |   |   |   |   |   |   |   |   | ร |   | ท |   | ด |   | ท |   | ด |   | ท |   |   | ช |   |   |   | ด |   | ท |   |   |         | ด       |          |         |   |         |
|     |   | - | ร | - | ม | - | ร | - |   | ท | ท | - |   | ด | ด | - | ช | - | ด | ท | - | ร | - | ม | - | ร | - | ด | - | ท | -       | ด       | 3 [35]   |         |   |         |
|     |   |   | ร |   | ม |   | ร |   | ท |   |   |   | ด |   |   |   | ช |   | ช |   |   | ร |   | ม |   | ร |   | ด |   | ท |         | ด       |          |         |   |         |
|     |   | - | ม | - |   | - | ร | - | ม | - | ด | - |   | ช | ช | - | ด | - | ท | - | ร | - | ท | - | ด | ด | - | ช | ช | - | ม       | 4 [36]  |          |         |   |         |
|     |   |   | ร |   | ท |   | ด |   | ท |   | ด |   | ช |   |   |   | ด |   | ท |   | ร |   | ท |   | ด |   | ช |   |   | ท |         |         |          |         |   |         |
| 2.1 |   | - | - | - | ด | - |   | ท | ท | - | - | - | ร | - |   | ท | ท | - | ช | - | - | ด | ท | - | ร | - | ม | - | ร | - | ท       | -       | ด        | 5 [37]  |   |         |
|     |   |   |   |   | ด |   |   |   | ท |   |   |   | ร |   |   | ท |   |   | ช |   |   | ร |   | ช |   | ร |   | ม |   | ร |         | ท       | ด        |         |   |         |
|     |   | - | ท | - | ร | - | ท | - |   | ด | ด | - |   | ช | ช | - | ม | - |   | - | - | ร | ม | - | ม | ม | - | ช | - | ด | 6 [38]  |         |          |         |   |         |
|     |   |   | ท |   | ร |   | ท |   | ด |   |   |   | ช |   |   |   | ท |   | ด |   | ท |   | ด |   | ท |   | ด |   |   | ช |         |         | ด        |         |   |         |
|     |   | - | - | - | ม | - | ร | - |   | ช | ช | - |   | ด | ด | - | ท | - | ร | - | ม | - | ร | - | ร | - | ท | ท | - | ด | ด       | -       | ช        | 7 [39]  |   |         |
|     |   |   |   |   | ท |   | ด |   | ช |   |   |   | ด |   |   |   | ท |   | ร |   | ม |   | ร |   | ท |   | ด |   |   | ช |         | ช       |          |         |   |         |
|     |   | - | พ |   |   | - | ม | - |   | - | ร | - | ร | - | - | ช | - | ด | ด | - | ท | - | ช | - | - | ด | ท | - | ด | - | ท       | 8 [40]  |          |         |   |         |
|     |   |   | ม | ร |   |   |   |   | ร |   |   |   | ด |   |   | ช |   | ด |   | ท |   | ช |   |   | ท |   | ด |   | ท |   | ด       |         | ท        |         |   |         |
| 3.1 |   | - | ท | - |   | ด | ด | - |   | ท | ท | - |   | ร | ร | - | ม | - | ม | พ | - | ด | - |   | ด | - | พ |   | - | ท | 9 [41]  |         |          |         |   |         |
|     |   |   | ท |   | ด |   |   |   | ท |   |   |   | ร |   | ม |   | ร |   |   |   | ม |   | ร |   |   | ร |   | ม | ร |   |         | ท       |          |         |   |         |
|     |   | - | ร | - | ม | - | ร | - |   | ท | ท | - |   | ด | ด | - | ช | - | ด | ท | - | ร | - | ม | - | ร | - | ด | - | ท | -       | ด       | 10 [42]  |         |   |         |
|     |   |   | ร |   | ม |   | ร |   | ท |   |   |   | ด |   |   |   | ช |   | ช |   |   | ร |   | ม |   | ร |   | ด |   | ท |         | ด       |          |         |   |         |
|     |   | - | ม | - |   | - | ร | - | ม | - | ด | - |   | ช | ช | - | ด | - | ท | - | ร | - | ท | - | ด | ด | - | ช | ช | - | ม       | 11 [43] |          |         |   |         |
|     |   |   | ร |   | ท |   | ด |   | ท |   | ด |   | ช |   |   |   | ด |   | ท |   | ร |   | ท |   | ด |   | ช |   |   | ท |         |         |          |         |   |         |
|     |   | - | พ | - | ม | - |   | - |   | - |   | - | - | ร | - | ม | - | - | - | - | ช | - | ช | - | ด | - | ท | ท | - | ด | 12 [44] |         |          |         |   |         |
|     |   |   |   |   |   |   |   |   | ร |   | ท |   | ด |   | ท |   | ด |   | ท |   |   | ช |   |   |   | ด |   | ท |   |   |         | ด       |          |         |   |         |
| 4.1 |   | - | ร | - | ม | - | ร | - |   | ท | ท | - |   | ด | ด | - | ช | - | ด | ท | - | ร | - | ม | - | ร | - | ด | - | ท | -       | ด       | 13 [45]  |         |   |         |
|     |   |   | ร |   | ม |   | ร |   | ท |   |   |   | ด |   |   |   | ช |   | ช |   |   | ร |   | ม |   | ร |   | ด |   | ท |         | ด       |          |         |   |         |
|     |   | - | ม | - |   | - | ร | - | ม | - | ด | - |   | ช | ช | - | ด | - | ท | - | ร | - | ท | - | ด | ด | - | ช | ช | - | ม       | 14 [46] |          |         |   |         |
|     |   |   | ร |   | ท |   | ด |   | ท |   | ด |   | ช |   |   |   | ด |   | ท |   | ร |   | ท |   | ด |   | ช |   |   | ท |         |         |          |         |   |         |
|     |   | - | - | ด | ช | - |   | ด | ด | - | - | ด | ท | - |   | ด | ด | - | ร | - | ท | - | ด | - | พ | พ | - |   | ม | ม | -       | ร       | 15 [47]  |         |   |         |
|     |   |   | ด | ช |   | ด |   |   | ท |   | ด |   |   | ร |   | ท |   | ด |   | พ |   | ด |   | พ |   |   | ม |   |   | ร |         |         |          |         |   |         |
|     |   | - |   | ด | ด | - | ท | - | ช | - | ด | - | ท | - | ด | - | ท | - | ด | - | ร | - | ม | ม | - | ร | - |   | ท | ท | -       | ด       | ด        | -       | ช | 16 [48] |
|     |   |   | ด |   |   |   | ท |   | ช |   | ด |   | ท |   | ด |   | ร |   | ม |   |   | ร |   | ท |   |   | ด |   |   | ช |         | ช       |          |         |   |         |
| 1.2 |   | - | - | - | ม | - | ร | - |   | ช | ช | - |   | ด | ด | - | ท | - | ร | - | ม | - | ร | - |   | ท | ท | - |   | ด | ด       | -       | ช        | 17 [49] |   |         |
|     |   |   |   |   | ท |   | ด |   | ช |   |   |   | ด |   |   |   | ท |   | ร |   | ม |   | ร |   | ท |   |   | ด |   |   | ช       |         |          |         |   |         |
|     |   | - |   | ม | พ | - | ด | - |   | - | ด | - | พ |   | - |   |   | - | ท | - |   | ด | ด | - | ท | ท | - |   | ร | ร | -       | ม       | 18 [50*] |         |   |         |
|     |   |   | ร |   |   |   | ม |   | ร |   | ม | ร | ท |   | พ |   | ม |   | พ |   |   |   | ร |   |   |   |   |   |   | ม |         |         |          |         |   |         |

|     |  |         |         |         |         |         |         |         |         |       |
|-----|--|---------|---------|---------|---------|---------|---------|---------|---------|-------|
| 2.2 |  | - ฝ     | - ม -   | - ร - ร | - - - ช | - ล ล   | - ท -   | ช ช -   | ล ล - ท | 19    |
|     |  | ม ร     | ร       | ล       | ช       | ล       | ท ช     | ล       | ท       |       |
|     |  | - ล ท   | - ร - ม | - ม - ม | - ร - ท | - ร - ม | - ร -   | ท ท -   | ล ล - ช | 20    |
|     |  | ช       | ร ม     | ช ม     | ร ท     | ร ม     | ร ท     | ล       | ช       |       |
|     |  | - ม -   | - ร - ม | - ล -   | ช ช - ล | - ช -   | ล ท - ร | - ม - ร | - ท - ล | 21    |
|     |  | ร ท     | ล ท     | ล ช     | ล       | ร ช     | ร       | ม ร     | ท ล     |       |
|     |  | - - ร   | - - ม ฝ | - ล - ล | - ฝ     | - ด     | - ฝ     | - -     | ร ม - ช | 22    |
|     |  | ล       | ร       | ฝ       | ม ร     | ท ล     | ม ร     | ท ด     | ช       |       |
|     |  | - ร ม   | - ช - ล | - ท - ล | - ช - ม | - -     | - ร ม   | - ม ม   | - ช - ล | 23    |
|     |  | ด       | ช ล     | ท ล     | ช ท     | ล ท     | ด       | ม       | ช ล     |       |
| 3.2 |  | - ท - ล | - ช - ม | - ร ม   | - ช - ล | - - - ร | - - ด   | - - - ท | - - ทท  | 24    |
|     |  | ท ล     | ช ท     | ด       | ช ล     | ล       | ทล      | ฝ       | ท       |       |
|     |  | - ท -   | ล ล -   | ท ท -   | ร ร - ม | - ม ฝ   | - ล -   | - ฝ - ม | - ร -   | 25    |
|     |  | ฝ       | ม       | ฝ       | ร       | ม       | ม       |         | ท       |       |
|     |  | - ล - ล | - ฝ     | - - ร   | - ม ฝ   | - ล - ท | - ล -   | ฝ ฝ -   | ม ม - ร | 26    |
|     |  | ฝ       | ม ร     | ล       | ร       | ล ท     | ล ฝ     | ม       | ร       |       |
|     |  | - ล ล   | - ท - ช | - ล - ท | - ด - ร | - ท     | ล ฝ     | - - ร   | - ม ฝ   | 27    |
|     |  | ล       | ท ช     | ล ท     | ด ร     | ล ฝ     | ม ร     | ล       | ร       |       |
|     |  | - ม ฝ   | - ล - ท | - ร - ท | - ล - ฝ | - - ร   | - ม ฝ   | - ท     | ล ฝ     | 28    |
|     |  | ร       | ล ท     | ร ท     | ล ฝ     | ล       | ร       | ล ฝ     | ม ร     |       |
| 4.2 |  | - ท -   | ล ล -   | ท ท -   | ร ร - ม | - ม ฝ   | - ล -   | - ฝ - ม | - ร -   | 29    |
|     |  | ท ล     | ท       | ร       | ม       | ร       | ม       |         | ท       |       |
|     |  | - ร - ท | - ล - ช | - ร - ช | - ล - ท | - ฝ - ม | - -     | - - -   | - ร - ม | 30    |
|     |  | ร ท     | ล ช     | ล ช     | ล ท     |         | ร ท     | ล ท     | ล ท     |       |
|     |  | - ร - ช | - ล ท   | - ร - ท | - ล - ช | - ล ท   | - ร - ม | - ร - ด | - ท - ล | 31    |
|     |  | ล ช     | ล ท     | ร ท     | ล ช     | ช       | ร ม     | ร ด     | ท ล     |       |
|     |  | - ม -   | - ร - ม | - ล -   | ช ช - ล | - ร - ท | - ล -   | ฝ ฝ -   | ม ม - ร | 32 :) |
|     |  | ร ท     | ล ท     | ล ช     | ล       | ร ท     | ล ฝ     | ม       | ร       |       |
|     |  | *Coda   |         |         |         |         |         |         |         |       |
|     |  | - ท -   | ท ท - ร | - ม - ร | - ท - ล | - ท - ร | - ท -   | ล ล -   | ช ช - ม | 33    |
|     |  | ท ท     | ร       | ม ร     | ท ล     | ท ร     | ท ล     | ช       | ท       |       |
|     |  | - ฝ - ม | - -     | - - -   | - ร - ม | - - -   | - ช - ช | - ล -   | ท ท - ล | 34    |
|     |  |         | ร ท     | ล ท     | ล ท     | ช       |         | ล ท     | ล       |       |
|     |  | - ร - ม | - ร -   | ท ท -   | ล ล - ช | - ล ท   | - ร - ม | - ร - ด | - ท - ล | 35    |
|     |  | ร ม     | ร ท     | ล       | ช       | ช       | ร ม     | ร ด     | ท ล     |       |
|     |  | - - - ร | - - - ม | - - - ช | - - - ล | - ร - ท | - ล - ฝ | - - - ม | - - - ร | 36 // |
|     |  | ล       | ท       | ช       | ล       | ร ท     | ล ด     | ท       | ล       |       |

# Sadhukarn Chan Dio

Tua Phattayakosol (TTP)

|     |   |   |   |   |   |   |   |   |   |   |   |   |   |   |   |   |   |   |   |   |   |   |   |   |   |   |   |   |   |   |   |   |   |   |
|-----|---|---|---|---|---|---|---|---|---|---|---|---|---|---|---|---|---|---|---|---|---|---|---|---|---|---|---|---|---|---|---|---|---|---|
| R F | - | ร | ม | - | ช | - | ล | ท | ล | ช | ฟ | - | ม | - | ร | - | ร | ร | - | ม | - | ฟ | - | ล | - | ฟ | - | ม | - | ร |   |   |   |   |
|     | ด |   |   |   | ช |   | ล | ท | ล | ช | ฟ |   | ม |   | ร |   | ร |   |   | ม |   | ฟ |   | ล |   | ฟ |   | ม |   | ร |   |   |   |   |
|     | - | ล | ล | - | ช | - | ม | - | ร | ม | - | ช | - | ล | - | ร | - | ท | - | ล | - | ช | - | ล | - |   | ท | ท | - | ล |   |   |   |   |
|     | ล |   |   |   | ช |   | ท |   | ด |   |   |   | ช |   | ล |   | ร |   | ท |   | ล |   | ช |   | ล |   | ท |   |   | ล |   |   |   |   |
|     | - | ท | - | ร | - | ท | - | ล | ล | - |   | ช | ช | - | ม | - | ร | - | ช | - | - | ล | ท | - | ล | - |   | ท | ท | - | ล |   |   |   |
|     | ท |   | ร |   | ท |   | ล |   |   |   | ช |   |   | ท |   | ล |   | ช |   |   |   | ท |   | ล |   | ท |   |   |   | ล |   |   |   |   |
|     | - | ท | - | ล | - | ช | - | ม | - | ร | ม | - | ช | - | ล | - | ร | - | ช | - | - | ล | ท | - | ร | - | ท | - | ล | - | ช |   |   |   |
|     | ท |   | ล |   | ช |   | ท |   | ท |   |   |   | ช |   | ล |   | ล |   | ช |   |   |   | ท |   | ร |   | ท |   | ล |   | ช |   |   |   |
|     | - | ม | - |   | ร | ร | - |   | ช | ช | - |   | ล | ล | - | ท | - | ล | ท | - | ร | - | ม | - | ม | - | ม | - | ร | - | ท |   |   |   |
|     | ท |   | ล |   |   |   | ช |   |   | ล |   |   | ท |   |   | ท |   | ช |   |   |   | ร |   | ม |   | ช |   | ม |   | ร |   | ท |   |   |
|     | - | ร | - | ท | - | ล | - | ช | - | ล | - |   | ท | ท | - | ล | - | ท | - | ม | - | ร | - | ล | ล | - |   | ช | ช | - | ม |   |   |   |
|     | ร |   | ท |   | ล |   | ช |   | ล |   | ท |   |   | ล |   | ท |   | ม |   | ร |   | ท |   | ล |   |   | ช |   |   |   | ท |   |   |   |
|     | - | - |   | - | ร | ม | - | - | ม | - | ช | - | ล | - | ร | - | ท | - | ล | - | ช | - | ล | - |   | ล | - |   | ท | ท | - | ล |   |   |
|     | ล |   | ท |   | ด |   |   | ม |   |   | ช |   | ล |   | ร |   | ท |   | ล |   | ช |   | ล |   | ท |   |   |   |   |   | ล |   |   |   |
|     | - | ท | - | ร | - | ท | - | ล | ล | - |   | ช | ช | - | ม | - | ล | ล | - | ช | - | ล | ท | ล | ช | ฟ | - | ม | - | ร |   |   |   |   |
|     | ท |   | ร |   | ท |   | ล |   |   |   | ช |   |   | ท |   | ล |   |   |   | ช |   | ล |   | ท | ล | ช | ฟ |   | ม |   | ร |   |   |   |
|     | - | ด |   | - | - | ร | - | - |   | ร | ม | - | ช | - | ร | - | ช | - | - | ล | ท | - | ร | - | ท | - | ล | - | ช |   |   |   |   |   |
|     |   | ท |   | ล |   | ท |   | ล |   | ท |   | ด |   |   | ช |   | ล |   | ช |   |   |   | ท |   | ร |   | ท |   | ล |   | ช |   |   |   |
|     | - | ฟ |   | ฟ | ม |   | - | - |   | - | ร | - | ม | - | - | - | ร | - | ม | - |   | ช | ช | - |   | ล | ล | - | ท |   |   |   |   |   |
|     | ล |   | ม |   |   | ร | ท |   | ล |   | ท |   | ล |   | ท |   | ล |   | ท |   | ช |   |   |   | ล |   |   |   |   | ท |   |   |   |   |
|     | - | ร | - | ม | - | ร | - | ท | ท | - |   | ล | ล | - | ช | - | ล | ล | - | ช | - | ล | - | ร | - | ด | - | ท | - | ล |   |   |   |   |
|     | ร |   | ม |   | ร |   | ท |   |   | ล |   |   | ช |   | ล |   |   |   | ช |   | ล |   | ร |   | ด |   | ท |   | ล |   | ล |   |   |   |
|     | - | ฟ | ฟ | - | ม | - | ร | - | - |   | ร | ม | - | ช | - | ท | - | ล | - | ช | - | ม | - | ร | ม | - | ช | - | ล |   |   |   |   |   |
|     | ฟ |   |   |   |   | ล |   | ท |   | ด |   |   | ช |   | ท |   | ล |   | ช |   | ท |   |   |   | ด |   |   |   | ช |   | ล |   |   |   |
|     | - | ร | - | ท | - | ล | - | ช | ช | - |   | ล | ล | - | ท | - | ล | ท | - | ร | - | ม | - | ร | - | ม | - | ม | - | ร | - | ท |   |   |
|     | ร |   | ท |   | ล |   | ช |   |   | ล |   |   | ท |   | ช |   |   |   | ร |   | ม |   | ช |   | ม |   | ร |   | ท |   | ล |   |   |   |
|     | - | - | ร | - | ม | - | ฟ | - | ล | - | ฟ | - | - |   | - | ล | ท |   | ด | ร | - | - | ร | - | ม | ฟ |   |   |   |   |   |   |   |   |
|     | ล |   |   |   |   |   |   |   |   |   | ม |   | ร |   | ช |   | ล |   | ท |   |   |   | ล |   |   |   |   |   |   | ร |   |   |   |   |
|     | - | ล | - | ท | - | ล | - | ฟ | ฟ | - |   | ม | ม | - | ร | - | ล | ท | - | ร | - | ม | - | ม | - | ม | - | ร | - | ท |   |   |   |   |
|     | ล |   | ท |   | ล |   | ฟ |   |   | ม |   |   | ร |   |   | ช |   |   |   | ร |   | ม |   | ช |   | ม |   | ร |   | ท |   |   |   |   |
|     | - | ท | - |   | ล | ล | - |   | ท | ท | - |   | ร | - | ร | - | ม | - | ม | - | ร | - | ท | - | ล | - | ช | - | ล | - | ท | ท | - | ล |
|     | ท |   | ล |   |   |   | ท |   |   | ร |   |   | ม |   | ม | ร | ท |   | ล |   | ช |   | ล |   | ล |   | ท |   |   |   | ล |   |   |   |
|     | - | ร | ม | - | ช | - | ล | ท | ล | ช | ฟ | - | ม | - | ร |   |   |   |   |   |   |   |   |   |   |   |   |   |   |   |   |   |   |   |
|     | ด |   |   |   | ช |   | ล | ท | ล | ช | ฟ |   | ม |   | ร |   |   |   |   |   |   |   |   |   |   |   |   |   |   |   |   |   |   |   |

:)

\*Coda

|   |   |   |   |   |   |   |   |   |   |   |   |   |   |   |   |   |   |   |   |   |   |   |   |   |   |   |   |   |   |   |
|---|---|---|---|---|---|---|---|---|---|---|---|---|---|---|---|---|---|---|---|---|---|---|---|---|---|---|---|---|---|---|
| - | ท | - | ม | ร | ท | - | ล | ล | - | ช | ช | - | ม | - | - | - | ร | ม | - | - | ม | - | ช | - | ล |   |   |   |   |   |
| ท |   | ม |   | ร | ท |   | ล |   |   | ช |   |   | ท |   | ล |   | ท |   | ด |   | ม |   |   | ล |   |   |   |   |   |   |
| - | ร | - | ท | - | ล | - | ช | - | ล | - |   | ท | ท | - | ล | - | ร | ม | - | ช | - | ล | ท | ล | ช | ฟ | - | ม | - | ร |
| ร |   | ท |   | ล |   | ช |   | ล |   | ท |   |   | ล |   | ด |   |   |   | ช |   | ล |   | ท | ล | ช | ฟ |   | ม |   | ร |

//



Sathukar

Intro.

Keo Sonankavai I (KS1)

|   |   |   |   |    |    |   |   |   |    |   |   |   |   |   |    |    |   |   |   |   |   |   |   |   |   |   |   |
|---|---|---|---|----|----|---|---|---|----|---|---|---|---|---|----|----|---|---|---|---|---|---|---|---|---|---|---|
| R | - | - | - | รํ | มร | ร | ม | ช | .ล | ท | ท | ท | ล | - | มํ | รํ | ท | - | ล | - | ฟ | ฟ | - | ม | ม | - | ร |
| F |   |   |   | ร  | ท  | ล | ท | ช |    | ท | ม | ร | ล | ร | ม  | ร  | ท | ล | ฟ |   | ม |   |   | ล |   |   |   |

  

|   |   |   |   |   |   |   |   |   |   |   |   |   |    |   |   |   |   |   |   |   |   |   |
|---|---|---|---|---|---|---|---|---|---|---|---|---|----|---|---|---|---|---|---|---|---|---|
| - | ท | - | ล | ล | - | ร | ร | - | ม | ม | - | ฟ | มฟ | ท | ล | ฟ | ม | ร | ม | - | ร | ร |
| ฟ | ม |   |   |   | ร |   | ม |   | ฟ | ร | ท | ล | ฟ  | ม |   |   | ร |   |   |   |   |   |

  

|   |   |   |   |   |    |    |   |   |   |   |   |   |   |   |   |   |   |   |   |   |   |
|---|---|---|---|---|----|----|---|---|---|---|---|---|---|---|---|---|---|---|---|---|---|
| - | ล | - | - | - | ฟม | มฟ | ล | ม | ร | - | ม | - | ล | ล | ช | ม | ช | ร | ม | ช | ล |
| ร |   |   |   | ร | ท  | ร  | ท | ล | ท | ล |   | ช | ม | ท | ท | ช | ล |   |   |   |   |

  

|    |   |   |   |   |   |   |   |   |   |   |   |    |    |    |    |    |    |    |   |   |   |   |
|----|---|---|---|---|---|---|---|---|---|---|---|----|----|----|----|----|----|----|---|---|---|---|
| ลช | ช | ล | ท | ท | ท | ท | - | ล | - | ช | - | ดํ | ดํ | รํ | มํ | รํ | รํ | ดํ | - | ท | - | ล |
| ม  | ร | ท | ร | ท | ล | ช | ด | ร | ม | ร | ด | ท  | ล  |    |    |    |    |    |   |   |   |   |

  

|   |   |   |   |   |   |   |   |   |   |   |   |    |   |   |   |    |    |   |   |   |   |   |   |   |   |   |   |   |
|---|---|---|---|---|---|---|---|---|---|---|---|----|---|---|---|----|----|---|---|---|---|---|---|---|---|---|---|---|
| - | ร | - | ร | - | - | - | ม | - | - | - | ช | .ล | ท | ท | ล | รํ | รํ | ท | - | ล | - | ฟ | ฟ | - | ม | ม | - | ร |
| ล | ล |   |   |   |   | ท | ช | ร | ล | ร | ท | ล  | ฟ |   | ม | ช  |    |   |   |   |   |   |   |   |   |   |   |   |

//

Sathukar

## Intro.

## Keo Sonankavai II (KR2)

//

# Sathukar

Intro.

Royal University of Fine Arts (KR)

|     |   |    |    |    |    |    |    |    |    |    |    |    |    |    |    |    |    |    |    |    |   |    |    |    |   |    |    |
|-----|---|----|----|----|----|----|----|----|----|----|----|----|----|----|----|----|----|----|----|----|---|----|----|----|---|----|----|
|     | R | -  | ร  | ม  | ร  | มร | มร | มร | ลช | ลช | ร  | -  | -  | -  | -  | -  | ฟ  | -  | ม  | ร  | ร | ม  | ร  | 0  |   |    |    |
|     | F | ล  | ทุ | ทุ | ทุ | ทุ | ทุ | ทุ | มร | มล |    |    |    |    |    |    | ด  |    | ร  |    | ร |    |    |    |   |    |    |
| 1.1 |   | -  | ร  | -  | -  | ร  | ม  | ร  | -  | ด  | ท  | ล  | ฟ  | ฟ  | ม  | ฟ  | ท  | ล  | ฟ  | -  | ม | -  | ร  | ร  | ร | 1  |    |
|     |   | ร  |    |    |    | ท  | ร  |    |    | ด  | ทุ | ล  | ฟ  |    | ร  | ทุ | ล  | ฟ  |    | ร  |   |    | ร  |    |   |    |    |
|     |   | ล  | ช  | ฟ  | ม  | ร  | ท  | ล  |    | -  | ร  | -  | ม  | ล  | ช  | ล  | ช  | ม  | ร  | ม  | ช | ล  |    |    |   | 2  |    |
|     |   | ฟ  | ร  |    |    |    |    | ฟ  | ฟ  | ท  | ล  | ทุ | ทุ |    | ช  | ทุ | ท  | ท  | ช  | ล  |   |    |    |    |   |    |    |
|     |   | ม  | ฟ  | ท  | ท  | ท  | ล  | ฟ  | ช  | ล  | ช  | ด  | ด  | ด  | ร  | ม  | ร  | ด  | ทุ | ล  |   |    |    |    |   | 3  |    |
|     |   | ร  |    | ทุ |    | ทุ | ล  | ม  |    | ช  |    | ด  |    |    | ร  | ม  | ร  | ด  | ทุ | ล  |   |    |    |    |   |    |    |
|     |   | ม  | ช  | -  | ร  | ม  | ช  | ท  | -  | ท  | -  | ล  | -  | ท  | ท  | ท  | ล  | ท  | ล  | -  | ช | -  | ม  |    |   | 4  |    |
|     |   | ร  | ทุ | ทุ | ทุ | ช  | ทุ |    | ร  | ล  | ทุ |    |    | ร  | ล  | ทุ | ล  | ช  | ทุ |    |   |    |    |    |   |    |    |
| 2.1 |   | -  | ท  | -  | ท  | ท  | ท  | -  | ล  | -  | ช  | -  | ล  | -  | ท  | -  | ร  | ม  | ร  | -  | ท | -  | ล  |    |   | 5  |    |
|     |   | ทุ | ทุ |    | ทุ |    |    | ล  | ช  |    |    | ล  | ทุ |    | ร  | ช  |    | ร  | ม  | ร  |   | ทุ | ล  |    |   |    |    |
|     |   | ท  | ท  | ม  | ช  | ล  | ล  | ท  | ล  | ช  | -  | ม  | -  | ม  | -  | ร  | ร  | -  | ม  | ม  | - | ช  | ช  | ล  |   | 6  |    |
|     |   | ทุ | ทุ | ช  | ล  | ทุ | ล  | ช  |    | ทุ |    | ท  | ล  |    | ทุ |    | ทุ |    | ช  |    |   | ล  |    |    |   |    |    |
|     |   | ฟ  | ม  | ร  | ร  | -  | ช  | ช  | -  | ล  | ล  | ท  | -  | ท  | -  | ท  | -  | ล  | -  | ช  | ช | -  | ช  |    |   | 7  |    |
|     |   | ร  | ร  |    | ช  |    | ล  |    | ทุ |    | ทุ |    | ร  | ม  | ร  | ทุ | ล  | ช  |    |    |   |    |    |    |   |    |    |
|     |   | -  | ฟ  | ฟ  | -  | ม  | -  | ร  | -  | -  | -  | ร  | -  | ม  | -  | ช  | -  | ร  | ม  | ช  | ช | -  | ล  | ล  | ท | 8  |    |
|     |   | ฟ  |    |    | ม  | ล  |    | ทุ | ล  | ทุ | ช  | ทุ |    | ทุ |    | ทุ |    | ทุ | ช  |    | ล |    | ทุ |    |   |    |    |
| 3.1 |   | ท  | ล  | -  | ล  | -  | ท  | ท  | -  | ร  | ร  | -  | ม  | ม  | ร  | ท  | ท  | ล  | -  | ล  | - | -  | ฟ  | ม  |   | 9  |    |
|     |   | ล  |    |    | ทุ |    | ทุ |    | ร  |    | ม  |    |    |    | ล  | ฟ  |    | ฟ  | ม  | ร  |   |    | ร  | ทุ |   |    |    |
|     |   | ม  | ฟ  | ท  | ท  | ท  | ล  | ฟ  | ช  | ล  | ช  | ด  | ด  | ด  | ร  | ม  | ร  | ด  | ทุ | ล  |   |    |    |    |   | 10 |    |
|     |   | ร  |    | ทุ |    | ทุ | ล  | ม  |    | ช  |    | ด  |    |    | ร  | ม  |    | ร  | ด  | ทุ | ล |    |    |    |   |    |    |
|     |   | ม  | ร  | ร  | -  | ร  | ม  | ช  | ท  | -  | ท  | -  | ล  | -  | ท  | ท  | -  | ท  | ล  | ท  | ล | -  | ช  | -  | ม | 11 |    |
|     |   | ร  |    | ทุ | ทุ | ช  | ทุ |    | ร  | ล  | ทุ |    |    | ร  | ล  | ทุ | ทุ | ล  | ช  |    |   |    |    |    |   |    |    |
|     |   | ล  | ม  | ฟ  | ม  | ร  | ท  | ล  |    | -  | ร  | -  | ม  | ล  | ช  | ล  | ช  | ม  | ร  | ม  | - | ช  | ล  |    |   | 12 |    |
|     |   | ฟ  | ร  |    |    |    |    | ฟ  | ฟ  | ท  | ล  | ทุ | ทุ |    | ช  | ทุ | ท  | ท  |    |    |   |    |    |    |   |    |    |
| 4.1 |   | ม  | ฟ  | ท  | ท  | ท  | ล  | ฟ  | ช  | ล  | ช  | ด  | ด  | ด  | ร  | ม  | ร  | ด  | ทุ | ล  |   |    |    |    |   | 13 |    |
|     |   | ร  |    | ทุ |    | ทุ | ล  | ม  |    | ช  |    | ด  |    |    | ร  | ม  |    | ร  | ด  | ทุ | ล |    |    |    |   |    |    |
|     |   | ม  | ร  | ร  | -  | ร  | ม  | ช  | ท  | -  | ท  | -  | ล  | -  | ท  | ท  | -  | ท  | ล  | ท  | ล | -  | ช  | -  | ม | 14 |    |
|     |   | ร  |    | ทุ | ทุ | ช  | ทุ |    | ร  | ล  | ทุ |    |    | ร  | ล  | ทุ | ทุ | ล  | ช  |    |   |    |    |    |   |    |    |
|     |   | -  | ล  | -  | ล  | ล  | ล  | ช  | ท  | -  | ท  | -  | ล  | ร  | ร  | ร  | ล  | ฟ  | -  | ม  | - | ร  | ร  | ร  |   | 15 |    |
|     |   | ล  | ล  |    | ล  |    |    | ช  | ทุ |    | ร  | ล  | ล  |    | ล  | ฟ  |    | ม  | ร  |    |   |    |    |    |   |    |    |
|     |   | -  | ร  | -  | ทุ | -  | ทุ | ล  | ล  | ล  | ล  | ล  | ล  | ล  | ล  | ล  | ล  | ล  | ล  | ล  | ล | ล  | ล  |    |   | 16 |    |
|     |   | ช  | ล  | ช  | ร  | ช  | ช  | ร  | ร  | ร  | ร  | ร  | ร  | ร  | ร  | ร  | ร  | ร  | ร  | ร  | ร | ร  | ร  |    |   |    |    |
| 1.2 |   | -  | ร  | ม  | ร  | ม  | ช  | ช  | -  | ล  | ล  | ท  | -  | ร  | -  | ม  | -  | ร  | -  | ท  | - | ล  | -  | ช  | ช | ช  | 17 |
|     |   | ทุ |    | ทุ |    | ช  |    | ล  |    | ทุ |    | ทุ |    | ร  | ม  | ร  | ทุ | ล  | ช  |    |   |    |    |    |   |    |    |
|     |   | ร  | ท  | ท  | ล  | ล  | ล  | ล  | ล  | ล  | ล  | ล  | ล  | ล  | ล  | ล  | ล  | ล  | ล  | ล  | ล | ล  | ล  |    |   | 18 |    |
|     |   | ล  | ฟ  |    | ฟ  | ม  | ร  |    |    | ร  | ทุ | ฟ  | ม  |    | ฟ  |    | ร  |    | ม  |    |   |    |    |    |   |    |    |

2.2

|   |   |   |   |   |   |   |   |   |   |   |   |   |   |   |   |   |   |   |   |   |   |   |   |   |   |
|---|---|---|---|---|---|---|---|---|---|---|---|---|---|---|---|---|---|---|---|---|---|---|---|---|---|
| - | ร | ร | - | ม | - | ร | - | - | ท | ร | - | ม | - | ช | ฟ | ม | ร | ร | - | ช | ช | - | ล | ล | ท |
| ล |   |   | ท | ล |   |   | ล |   | ท | ช |   | ร |   | ร |   | ร |   | ช |   | ล |   | ท |   |   |   |

19

|   |   |   |   |   |   |   |   |   |   |   |   |   |   |   |   |   |   |   |   |   |   |   |
|---|---|---|---|---|---|---|---|---|---|---|---|---|---|---|---|---|---|---|---|---|---|---|
| - | ช | ล | ร | ม | ล | ม | ม | ม | - | ร | - | ท | ล | ม | ร | ท | ล | ช | ล | - | ช | ช |
| ร | ช |   | ร | ม | ช | ล | ม |   | ร | ท | ช | ม | ร | ท | ล |   |   |   |   |   |   |   |

20

|   |   |   |   |   |   |   |   |   |   |   |   |   |   |   |   |   |   |   |   |   |   |   |   |   |   |   |
|---|---|---|---|---|---|---|---|---|---|---|---|---|---|---|---|---|---|---|---|---|---|---|---|---|---|---|
| - | - | - | ม | - | ช | ช | - | ร | - | ม | - | ช | - | ล | - | ช | - | - | ล | ร | ม | ร | - | ท | - | ล |
|   |   |   | ท |   | ช |   |   | ล |   | ท |   | ช | ล |   | ร |   | ช | ร | ม | ร |   | ท | ล |   |   |   |

21

|   |   |   |   |   |   |   |   |   |   |   |   |   |   |   |   |   |   |   |   |   |   |   |   |   |   |   |
|---|---|---|---|---|---|---|---|---|---|---|---|---|---|---|---|---|---|---|---|---|---|---|---|---|---|---|
| - | ฟ | - | ฟ | ฟ | ฟ | ล | ล | ฟ | - | ม | - | ร | - | ร | ร | ม | - | ร | - | - | ท | ร | - | ม | - | ช |
| ฟ |   |   | ฟ |   |   | ล | ล |   | ท | ล |   | ท | ท |   | ล |   |   |   |   |   | ล |   | ท | ช |   |   |

22

|   |   |   |   |   |   |   |   |   |   |   |   |   |   |   |   |   |   |   |   |   |   |   |   |   |   |
|---|---|---|---|---|---|---|---|---|---|---|---|---|---|---|---|---|---|---|---|---|---|---|---|---|---|
| - | ท | ท | - | ท | - | ล | ท | ท | ล | - | ช | - | ม | - | ม | - | ร | ร | - | ม | ม | - | ช | ช | ล |
| ท |   |   | ร | ล |   | ท | ล |   | ช | ท |   | ท | ล |   |   |   | ท |   |   | ช |   | ล |   |   |   |

23

|   |   |   |   |   |   |   |   |   |   |   |   |   |   |   |   |   |   |   |   |   |   |   |   |   |   |
|---|---|---|---|---|---|---|---|---|---|---|---|---|---|---|---|---|---|---|---|---|---|---|---|---|---|
| - | ท | ท | - | ท | - | ล | - | ช | - | ฟ | - | ช | - | ล | ฟ | ม | ร | ร | - | ช | ช | - | ล | ล | ท |
| ท |   |   | ร | ล |   | ช | ล |   | ช | ล |   | ร |   | ร |   | ร |   | ช |   |   | ล |   | ท |   |   |

24

3.2

|   |   |   |   |   |   |   |   |   |   |   |   |   |   |   |   |   |   |   |   |   |   |
|---|---|---|---|---|---|---|---|---|---|---|---|---|---|---|---|---|---|---|---|---|---|
| ล | ช | ล | ล | ท | ท | ม | ร | ร | ร | ม | ม | ร | ท | ท | ล | - | ล | - | - | ฟ | ม |
| ล |   |   | ท |   |   | ร |   |   |   | ม |   | ล | ฟ |   | ฟ | ม | ร |   |   | ร | ท |

25

|   |   |   |   |   |   |   |   |   |   |   |   |   |   |   |   |   |   |   |   |   |   |
|---|---|---|---|---|---|---|---|---|---|---|---|---|---|---|---|---|---|---|---|---|---|
| ล | ท | ล | ล | ล | - | ร | - | ม | - | ฟ | ม | ฟ | ท | ล | ฟ | ม | ร | ม | - | ร | ร |
|   | ฟ |   | ม | ร |   | ท | ล | ล |   | ท | ล | ร | ท | ล | ฟ | ม |   |   |   | ร |   |

26

|   |   |   |   |   |   |   |   |   |   |   |   |   |   |   |   |   |   |   |   |   |   |   |   |   |   |
|---|---|---|---|---|---|---|---|---|---|---|---|---|---|---|---|---|---|---|---|---|---|---|---|---|---|
| - | ช | ช | - | ล | - | ท | - | ล | - | ร | ร | ร | - | ฟ | ฟ | - | ร | ร | - | ล | ท | ล | - | ฟ | ฟ |
| ช |   |   | ล |   | ท |   | ล |   | ร |   | ร |   |   | ฟ |   |   | ร |   |   | ล | ท | ล |   | ฟ |   |

27

|   |   |   |   |   |   |   |   |   |   |   |   |   |   |   |   |   |   |   |   |   |   |   |
|---|---|---|---|---|---|---|---|---|---|---|---|---|---|---|---|---|---|---|---|---|---|---|
| - | ร | ม | ล | ท | ร | ร | ท | - | ล | - | ฟ | ม | ฟ | ท | ล | ฟ | ม | ร | ม | - | ร | ร |
| ล | ร |   | ล | ท | ท | ท | ล | ล | ร | ท | ล | ฟ | ม | ร | ล | ฟ | ม |   |   |   | ร |   |

28

4.2

|   |   |   |   |   |   |   |   |   |   |   |   |   |   |   |   |   |   |   |   |   |   |   |
|---|---|---|---|---|---|---|---|---|---|---|---|---|---|---|---|---|---|---|---|---|---|---|
| - | ล | ฟ | ม | ร | ท | ล | - | ร | - | ม | - | ฟ | - | ช | ล | ช | - | ล | - | - | ฟ | ม |
| ฟ | ม |   |   |   | ฟ | ฟ | ท | ล |   | ท |   | ล |   |   | ฟ | ม | ร |   |   |   | ร | ท |

29

|   |   |   |   |   |   |   |   |   |   |   |   |   |   |   |   |   |   |   |   |   |   |   |   |   |
|---|---|---|---|---|---|---|---|---|---|---|---|---|---|---|---|---|---|---|---|---|---|---|---|---|
| - | ท | - | ท | ท | ท | - | ล | - | ช | - | ล | - | ท | ล | ท | ร | ท | ร | ม | ร | ม | ม | ม | ม |
| ท |   |   | ท |   |   | ล |   | ช |   | ล |   | ท |   | ล |   | ท |   | ร |   | ม |   |   |   |   |

30

|   |   |   |   |   |   |   |   |   |   |   |   |   |   |   |   |   |   |   |   |   |   |   |   |   |   |   |
|---|---|---|---|---|---|---|---|---|---|---|---|---|---|---|---|---|---|---|---|---|---|---|---|---|---|---|
| ม | ม | - | ร | - | ท | - | ล | - | ช | ช | ช | - | ล | ล | - | ร | - | ม | - | ร | - | ล | - | ท | - | ล |
| ช | ล | ช | ร | ท | ล | ช |   |   | ช | ช |   | ล |   |   | ร | ม | ร | ล |   | ท | ล |   |   |   |   |   |

31

|   |   |   |   |   |   |   |   |   |   |   |   |   |   |   |   |   |   |   |   |   |   |   |   |   |   |
|---|---|---|---|---|---|---|---|---|---|---|---|---|---|---|---|---|---|---|---|---|---|---|---|---|---|
| - | - | ม | ร | - | ม | - | ช | - | ท | - | ท | - | ล | - | ร | - | ท | - | ล | - | ฟ | - | - | ม | ร |
|   |   | ล |   | ท |   | ช |   | ท |   | ร | ล |   | ร | ท | ล | ล |   |   | ล |   | ล |   | ล |   |   |

32

# Sadhukarn

Intro.

Ban Pang Lang (IP)

|     |   |   |   |   |   |   |   |   |   |   |   |   |   |   |   |   |   |   |   |   |   |   |   |   |   |   |   |   |   |   |   |   |   |  |
|-----|---|---|---|---|---|---|---|---|---|---|---|---|---|---|---|---|---|---|---|---|---|---|---|---|---|---|---|---|---|---|---|---|---|--|
|     | R | ร | ม | ร | ช | ท | ล | ร | ท | ม | ร | ท | ล | - | - | - | - | - | ม | ร | ท | - | ล | - | ฟ | - | - | - | ม | - | - | - | ร |  |
|     | F | ล | ท | ล | ช | ท | ล | ร | ท | ม | ร | ท | ล |   |   |   |   |   | ม | ร | ท | ล | ด | ด |   |   |   | ท |   |   |   | ล |   |  |
| 1.1 |   | - | - | - | ท | - | ล | - |   | ร | ร | - |   | ม | ม | - | ฟ | - | ล | - | ท | - | ล | - | ฟ | ฟ | - |   | ม | ม | - | ร |   |  |
|     |   |   |   |   | ฟ |   |   |   | ม | ร |   |   |   |   |   |   | ฟ |   | ล |   | ท |   | ล |   | ฟ |   |   | ม |   |   |   | ล |   |  |
|     |   | - | - | - |   | - | ล | - | ล | - | ช | - |   | ท | ท | - | ล | - | ด | ด | - | ร | - | ม | - | ร | - | ด | - | ท | - | ล |   |  |
|     |   |   |   |   | ล |   |   |   | ล |   | ช |   | ท |   |   |   | ล |   | ด |   |   |   | ร | ม |   | ร | ด |   | ท |   | ล |   |   |  |
|     |   | - | ร | - | ม | - | ร | - |   | ท | ท | - |   | ล | ล | - | ช | - | ร | - | ช | - | ล | - | ท | - | ม | - | ร | - | ท | - | ล |  |
|     |   |   | ร |   | ม |   | ร |   | ท |   |   |   | ล |   |   |   | ช |   | ล |   | ช |   | ล |   | ท |   | ม |   | ร |   | ท |   | ล |  |
|     |   | ม | ร |   |   | ร | ม | - | ช | ช | ล | ท | - | ล | - | ท | ท | - | ท | - |   | ล | ล | - |   | ช | ช | - | ม |   |   |   |   |  |
|     |   | ท |   | ท | ล | ท |   |   | ช |   |   |   | ล |   | ท |   | ท |   | ท |   | ล |   | ท |   | ล |   | ช |   | ท |   |   |   |   |  |
| 2.1 |   | ม | ร | ร | ม | - | ช | - |   | ม | ร | ร | - | ท | ท | - | ช | ช | - | ล | - | ท | - | ม | - | ร | - | ท | - | ล |   |   |   |  |
|     |   | ท |   |   |   |   | ร |   |   | ท |   |   |   | ช |   |   |   |   | ล |   | ท |   | ม |   | ร |   | ท |   | ล |   |   |   |   |  |
|     |   | - | ช | ช | - | ล | - | ท | - | ล | - | ช | - | ฟ | - | ม | ฟ | ม |   | ร | ม | - | ช | ช | ล | ท | - | ล |   |   |   |   |   |  |
|     |   | ช |   |   |   | ล |   | ท |   | ล |   | ช |   | ด |   | ท |   | ร | ท | ล | ท |   | ช |   |   |   |   |   |   |   |   |   |   |  |
|     |   | - | ร | - | ม | - | ช | ช | - | ท | - | ล | - | ท | ท | - | ร | - | ม | - | ร | - |   | ท | ท | - |   | ล | ล | - | ช |   |   |  |
|     |   | ล |   | ท |   | ช |   |   | ท |   | ล |   | ท |   | ร | ม |   | ร |   | ท |   |   |   | ล |   |   |   |   |   |   |   |   |   |  |
|     |   | ม | ร | ร | ม | - | ช | - |   | ม | ร | ร | - | ช | ช | - | ร | - | ท | - | ล | - |   | ช | ช | - |   | ล | ล | - | ท |   |   |  |
|     |   | ท |   |   |   |   | ร |   |   | ท |   |   |   | ร |   | ท |   | ล |   | ล |   | ช |   |   |   |   |   |   |   |   |   |   |   |  |
| 3.1 |   | - | ช | ช | - | ล | - | ท | - | ล | - | ช | - | ร | - | ม | - | ฟ | ล | ท | ล | ท | ล | ฟ | ม |   |   |   |   |   |   |   |   |  |
|     |   | ช |   |   |   | ล |   | ท |   | ล |   | ช |   | ล |   | ท | ร | ม |   | ฟ | ม | ฟ | ม | ร |   | ร |   | ท |   |   |   |   |   |  |
|     |   | - | ร | - | ม | - | ร | - |   | ท | ท | - |   | ล | ล | - | ช | - | ร | - | ช | - | ล | - | ท | - | ม | - | ร | - | ท | - | ล |  |
|     |   |   | ร |   | ม |   | ร |   | ท |   |   |   | ล |   |   |   | ล |   | ล |   | ช |   | ล |   | ท |   | ม |   | ร |   | ท |   | ล |  |
|     |   | ม | ร |   |   | ร | ม | - | ช | ช | ล | ท | - | ล | - | ท | ท | - | ท | - |   | ล | ล | - |   | ช | ช | - | ม |   |   |   |   |  |
|     |   | ท |   | ท | ล | ท |   |   | ช |   |   |   | ล |   | ท |   | ท |   | ท |   | ล |   | ท |   | ล |   | ช |   | ท |   |   |   |   |  |
|     |   | - | ฟ | - | ม | - | - |   | - | - | - | ร | - | ม | - | ร | - | ช | - | ล | - | ท | - | ม | - | ร | - | ท | - | ล |   |   |   |  |
|     |   |   |   |   |   | ร |   | ท |   | ล |   | ท |   | ล |   | ช |   | ล |   | ท |   | ม |   | ร |   | ท |   | ล |   |   |   |   |   |  |
| 4.1 |   | - | ร | - | ม | - | ร | - |   | ท | ท | - |   | ล | ล | - | ช | - | ร | - | ช | - | ล | - | ท | - | ม | - | ร | - | ท | - | ล |  |
|     |   |   | ร |   | ม |   | ร |   | ท |   |   |   | ล |   |   |   | ล |   | ล |   | ช |   | ล |   | ท |   | ม |   | ร |   | ท |   | ล |  |
|     |   | ม | ร |   |   | ร | ม | - | ช | ช | ล | ท | - | ล | - | ท | ท | - | ท | - |   | ล | ล | - |   | ช | ช | - | ม |   |   |   |   |  |
|     |   | ท |   | ท | ล | ท |   |   | ช |   |   |   | ล |   | ท |   | ท |   | ท |   | ล |   | ท |   | ล |   | ช |   | ท |   |   |   |   |  |
|     |   | - | ล | ล | - | ล | ล | - | ฟ | ฟ | - | ช | - | ล | ท | ท | ท | - | ล | - |   | ฟ | ฟ | - |   | ม | ม | - | ร |   |   |   |   |  |
|     |   | ล |   |   |   | ล |   |   | ฟ |   |   | ช |   | ล |   | ท |   | ล |   | ฟ |   |   |   | ม |   |   |   |   |   |   |   |   |   |  |
|     |   | - | ล | ล | - | ท | - | ช | - | ล | - | ท | - | ด | - | ร | - | ช | ช | - | ล | - | ท | - | ร | - | ท | - | ล | - | ช |   |   |  |
|     |   | ล |   |   | ท |   | ช |   | ล |   | ท |   | ด |   | ร |   | ช |   |   |   | ล |   | ท |   | ร |   | ท |   | ล |   |   |   |   |  |
| 1.2 |   | - | ร | - | ม | - | ช | ช | - | ท | - | ล | - | ท | ท | - | ร | - | ม | - | ร | - |   | ท | ท | - |   | ล | ล | - | ช |   |   |  |
|     |   | ล |   | ท |   | ช |   |   | ท |   | ล |   | ท |   | ร | ม |   | ร |   | ท |   |   |   | ล |   |   |   |   |   |   |   |   |   |  |
|     |   | - | - | ร | - | ม | ฟ | - | ท |   | ล | ฟ |   | - | ฟ |   | ฟ | ม |   | - | - |   | - | ร | - | ม |   |   |   |   |   |   |   |  |
|     |   | ล |   |   | ร |   |   |   | ล | ฟ |   | ม | ร |   | ล |   | ม |   | ร |   | ท |   | ล |   | ท |   | ล |   | ท |   |   |   |   |  |

2.2

|   |   |   |   |   |   |   |   |   |   |   |   |   |   |   |   |   |   |   |   |   |   |   |   |   |   |   |
|---|---|---|---|---|---|---|---|---|---|---|---|---|---|---|---|---|---|---|---|---|---|---|---|---|---|---|
| ม | ร | ร | ม | - | ช | - | ม | ร | ร | - | ช | ช | - | ร | - | ท | - | ล | - | ช | ช | - | ล | ล | - | ท |
| ท |   |   |   |   |   |   | ร |   | ท |   | ช |   |   | ร |   | ท |   | ล |   | ช |   |   | ล |   | ท |   |

19

|   |   |   |   |   |   |   |   |   |   |   |   |   |   |   |   |   |   |   |   |   |   |   |   |   |   |   |   |   |   |
|---|---|---|---|---|---|---|---|---|---|---|---|---|---|---|---|---|---|---|---|---|---|---|---|---|---|---|---|---|---|
| - | ล | ท | - | ร | - | ม | - | ม | - | ม | - | ร | - | ท | - | ช | ช | - | ล | - | ท | - | ร | - | ท | - | ล | - | ช |
| ช |   |   |   | ร |   | ม |   | ช |   | ม |   | ร |   | ท |   | ช |   |   | ล |   | ท |   | ร |   | ท |   | ล |   | ช |

20

|   |   |   |   |   |   |   |   |   |   |   |   |   |   |   |   |   |   |   |   |   |   |   |   |   |   |   |   |   |
|---|---|---|---|---|---|---|---|---|---|---|---|---|---|---|---|---|---|---|---|---|---|---|---|---|---|---|---|---|
| - | ม | - | ร | ร | - | ม | ม | - | ช | ช | - | ล | - | ช | - | ล | - | ท | - | ล | - | ม | ร | ล | - | ท | - | ล |
| ท |   |   | ล |   |   | ท |   |   | ช |   |   | ล |   | ช |   | ล |   | ท |   | ล |   | ม | ร | ล |   | ท |   | ล |

21

|   |   |   |   |   |   |   |   |  |   |   |  |   |   |   |   |   |   |   |   |   |   |   |   |   |
|---|---|---|---|---|---|---|---|--|---|---|--|---|---|---|---|---|---|---|---|---|---|---|---|---|
| - | ล | ล | ฟ | ม | ฟ | - | ท |  | ล | ฟ |  | - | - | - | ร | ท | ร | - | ม | - | ล | ล | - | ช |
| ล |   |   | ร |   |   |   |   |  | ล | ฟ |  | ม | ร |   | ท |   | ล |   | ท |   | ล |   | ช |   |

22

|   |   |   |   |   |   |   |   |   |   |   |   |   |   |   |   |   |   |   |   |   |   |   |   |   |   |   |
|---|---|---|---|---|---|---|---|---|---|---|---|---|---|---|---|---|---|---|---|---|---|---|---|---|---|---|
| - | ท | ท | - | ท | - | ท | ท | ล | ช | - | ฟ | - | ม | ฟ | - | ม |   | ร | ม | - | ช | ช | ล | ท | - | ล |
| ท |   |   | ร |   | ท | ร | ท | ล | ช |   | ด |   | ท |   | ร | ท | ล | ท |   | ช |   |   |   |   |   |   |

23

|   |   |   |   |   |   |   |   |   |   |   |   |   |   |   |   |   |   |   |   |   |   |   |   |   |   |   |   |
|---|---|---|---|---|---|---|---|---|---|---|---|---|---|---|---|---|---|---|---|---|---|---|---|---|---|---|---|
| - | ท | - | ล | - | ช | - | ฟ | ฟ | - | ช | ช | - | ล | - | ร | - | ม | - | ช | ช | - | ท | - | ล | - | ท | ท |
| ท |   |   | ล |   | ช |   | ฟ |   |   | ช |   |   | ล |   | ล |   | ท |   | ช |   |   | ท |   | ล |   | ท |   |

24

3.2

|   |   |   |   |   |   |   |   |   |   |   |   |   |   |   |   |   |   |   |   |   |   |   |   |   |   |   |
|---|---|---|---|---|---|---|---|---|---|---|---|---|---|---|---|---|---|---|---|---|---|---|---|---|---|---|
| - | ช | ช | - | ล | - | ท | - | ล | - | ช | - | ฟ | - | ม | - | - | ม | ฟ | - | ล | - | ล | ล | - | ฟ | ม |
| ช |   |   | ล |   | ท | ล |   | ช |   | ด |   | ท |   | ร |   |   | ม |   | ล |   | ล |   | ฟ |   | ร | ท |

25

|   |   |   |   |   |   |   |   |   |   |   |   |   |   |   |   |   |   |   |   |   |   |   |   |   |   |   |   |
|---|---|---|---|---|---|---|---|---|---|---|---|---|---|---|---|---|---|---|---|---|---|---|---|---|---|---|---|
| - | - | ร | ร | ร | - | ร | - | ม | ฟ | - | ม | - | ฟ | - | ล | - | ท | - | ล | - | ฟ | ฟ | - | ม | ม | - | ร |
|   |   | ล |   | ล |   |   |   | ฟ |   | ม |   | ฟ |   | ล |   | ท |   | ล |   | ฟ |   | ม |   | ร |   |   |   |

26

|   |   |   |   |  |   |   |   |   |   |   |   |   |   |   |   |   |   |   |   |   |   |   |   |   |   |   |
|---|---|---|---|--|---|---|---|---|---|---|---|---|---|---|---|---|---|---|---|---|---|---|---|---|---|---|
| - | ร | ร | ด |  | ท | ล | ล | ท | - | ด | - | ร | - | ท | ล | ฟ | - | ม | - | ร | ร | - | ม | ม | - | ฟ |
| ล |   |   | ล |  | ท | ล |   | ฟ |   | ช |   | ล |   | ท | ล | ฟ |   | ม |   | ร |   | ม |   | ฟ |   |   |

27

|   |   |   |   |   |   |   |   |   |   |   |   |   |   |   |   |   |   |   |   |   |   |   |   |   |   |   |   |   |   |
|---|---|---|---|---|---|---|---|---|---|---|---|---|---|---|---|---|---|---|---|---|---|---|---|---|---|---|---|---|---|
| - | ม | ฟ | - | ล | - | ท | - | ร | - | ท | - | ล | - | ฟ | - | ร | ร | - | ม | - | ฟ | - | ล | - | ฟ | - | ม | - | ร |
| ร |   |   | ล |   | ท | ร |   | ท |   | ล |   | ฟ |   | ล |   | ม |   | ฟ |   | ล |   | ฟ |   | ม |   | ล |   |   |   |

28

4.2

|   |   |   |   |   |   |   |   |   |   |   |   |   |   |   |   |   |   |   |   |   |   |   |
|---|---|---|---|---|---|---|---|---|---|---|---|---|---|---|---|---|---|---|---|---|---|---|
| - | ฟ | - | ม | - | - | - | - | ร | - | ม | - | - | ม | ฟ | - | ล | - | ล | ล | - | ฟ | ม |
|   |   |   | ร |   | ท | ล |   | ท |   |   |   | ร |   |   | ม |   | ฟ |   | ร |   | ท |   |

29

|   |   |   |   |   |   |   |   |   |   |   |   |   |   |   |   |   |   |   |   |   |   |   |   |   |   |
|---|---|---|---|---|---|---|---|---|---|---|---|---|---|---|---|---|---|---|---|---|---|---|---|---|---|
| - | ด | - | ท | - | - | - | - | ล | - | ท | - | ร | ร | - | ม | - | ฟ | - | ท | - | ล | - | ฟ | - | ม |
|   |   |   | ล |   | ฟ |   | ม |   | ฟ |   | ร |   |   | ม |   | ฟ |   | ท |   | ล |   | ฟ |   | ม |   |

30

|   |   |   |   |   |   |   |   |   |   |   |   |   |   |   |   |   |   |   |   |   |   |   |   |   |   |   |   |   |   |
|---|---|---|---|---|---|---|---|---|---|---|---|---|---|---|---|---|---|---|---|---|---|---|---|---|---|---|---|---|---|
| - | ร | - | ม | - | ร | - | ท | ท | - | ล | ล | - | ช | - | ร | - | ช | - | ล | - | ท | - | ม | - | ร | - | ท | - | ล |
| ร |   |   | ม |   | ร |   | ท |   | ล |   | ช |   | ช |   | ล |   | ท |   | ม |   | ร |   | ท |   | ล |   |   |   |   |

31

|   |   |   |   |   |   |   |   |   |   |   |   |   |   |   |   |   |   |   |   |   |   |   |   |   |   |   |   |   |
|---|---|---|---|---|---|---|---|---|---|---|---|---|---|---|---|---|---|---|---|---|---|---|---|---|---|---|---|---|
| ม | ม | ร | - | ร | ม | - | ช | ช | ล | ท | - | ล | - | ม | ร | ท | - | ล | - | ฟ | - | - | - | ม | - | - | - | ร |
| ท |   |   | ล |   | ท |   | ช |   | ล |   | ม |   | ร |   | ท |   | ล |   | ด |   | ท |   | ล |   |   |   |   |   |

32 //

# Sadhukarn

Intro.

Ban Nong Sai (IN)

|     |   |   |   |   |   |   |   |   |   |   |   |   |   |   |   |   |   |   |   |   |   |   |   |   |   |   |   |   |   |   |   |    |   |   |
|-----|---|---|---|---|---|---|---|---|---|---|---|---|---|---|---|---|---|---|---|---|---|---|---|---|---|---|---|---|---|---|---|----|---|---|
| R   | - | - | - | ร | - | - | - | ม | - | ช | ล | ท | ร | ท | - | ล | - | ม | ร | ท | - | ล | - | ฟ | ฟ | - | ม | ม | - | ร | 0 |    |   |   |
| F   |   |   |   | ล |   |   |   | ท |   | ช | ล | ท | ร | ท | ล |   | ม | ร | ท |   | ล | ด |   |   | ท |   |   |   | ล |   |   |    |   |   |
| 1.1 | - | - | ร |   | - | ร | - | ร | - | ม | - | ฟ | - | ม | - | ฟ | - | ล | - | ท | - | ล | - | ฟ | ฟ | - | ม | ม | - | ร | 1 |    |   |   |
|     |   |   | ล |   | ล | ล |   | ท |   | ด |   | ท |   | ด |   | ล | ท |   | ล | ด |   |   |   | ท |   |   |   |   | ล |   |   |    |   |   |
|     | - | - | ล | ช | - | ล | ล | - | ล | - | ท | - | ล | ล | - | ช | - | ล | - | ท | - | ด | - | ร | ร | - | ด | - | ท | - | ล | 2  |   |   |
|     |   |   | ช |   | ล | ล |   | ล | ท |   | ล | ล |   | ช | ล |   | ท | ด |   | ร | ด |   | ท |   |   |   |   | ล |   |   |   |    |   |   |
|     | - | ร | - | ม | - | ร | - |   | ท | ท | - | ล | ล | - | ช | - | ด | ด | - | ร | ม |   | ร | ร | - | ด | - | ท | - | ล | 3 |    |   |   |
|     |   | ร | ม |   | ร | ท |   | ท | ล |   | ล | ช |   | ด |   |   |   | ร | ม |   | ร | ด |   | ท |   |   | ล |   |   |   |   |    |   |   |
|     | - | - |   |   | - | ร | - | ม | - | ช | ช | - | ท | - | ล | - | ร | ร | - | ท | - | ล | - | ร | ร | - | ท | - | ล | ช | - | ม  | 4 |   |
|     |   | ล | ท |   | ล | ท |   | ช |   |   |   | ท | ล |   | ร |   |   | ท | ล |   | ร | ท |   | ล | ร | ท | ล | ช | ท |   |   |    |   |   |
| 2.1 | - | ฟ |   |   | - | ม | - |   | - | ร | - | ร | - | - | - | ท | - | ช | ช | - | ล | - | ท | - | ล | - | ล | - | ล | - | ท | -  | ล | 5 |
|     |   | ม | ร |   |   |   |   | ล |   |   |   | ล |   |   |   | ท |   | ช |   |   | ล | ท |   | ล | ล | ร |   | ท |   | ล |   |    |   |   |
|     | - | ช | ช | - | ล | - | ท |   | ล | - | ช | - | ฟ | - | ม | - | - | - | - | ร | - | ม | - | ล | - |   | ช | ช | ล |   |   | 6  |   |   |
|     |   | ช |   |   | ล | ท |   | ล | ช |   | ด | ท |   | ล | ท |   | ล | ท |   | ล | ท |   | ล | ล | ช |   | ล |   |   |   |   |    |   |   |
|     | - | ม | ร | - | - | ช | - | ท | ล | - | - | ท | - | ท | - | ท | - | ท | - | ท | - | ท | - | ท | ท | - | ล | ล | ช |   |   | 7  |   |   |
|     |   | ท | ล |   |   | ช |   | ท | ล |   |   | ท |   | ร | ม |   | ร | ท |   |   |   |   | ล |   |   |   | ช |   |   |   |   |    |   |   |
|     | - | ฟ |   |   | - | ม | - |   | - | ร | - | ร | - | - | - | ช | - | ม | - | ร | ร | - | ช | ช | - | ล | ล | - | ท |   |   | 8  |   |   |
|     |   | ม | ร |   |   |   |   | ล |   |   |   | ล |   | ช | ท | ล |   | ล | ช |   | ช | ล |   | ล | ล | ท |   |   |   |   |   |    |   |   |
| 3.1 | - | ช | ช | - | ล | - | ท | - | - | - | ร | - | ม | - | - | ฟ | ฟ | - | ล | - | ล | ฟ | ม |   | ฟ | ม | ร |   |   |   |   | 9  |   |   |
|     |   | ช |   |   | ล | ท |   | ล | ท |   | ล | ท |   |   |   | ฟ |   | ม |   |   |   |   | ร |   |   |   |   |   |   |   |   |    |   |   |
|     | - | ร | - | ม | - | ร | - |   | ท | ท | - | ล | ล | - | ช | - | ด | ด | - | ร | ม |   | ร | ร | - | ด | - | ท | - | ล |   | 10 |   |   |
|     |   | ร | ม |   | ร | ท |   | ท | ล |   | ล | ช |   | ด |   |   |   | ร | ม |   | ร | ด |   | ท |   |   | ล |   |   |   |   |    |   |   |
|     | - | - |   |   | - | ร | - | ม | - | - | ช | ท | - | ล | - | ท | - | ร | - | ท | - | ล | ล | - | ช | ช | - | ม |   |   |   | 11 |   |   |
|     |   | ล | ท |   | ล | ท |   | ช |   |   |   | ท | ล |   | ท | ท |   | ท | ล |   |   |   | ช |   |   |   | ท |   |   |   |   |    |   |   |
|     | - | ล | ล | ช | ช | ช | ช | - | ร | - | ม | - | - | ช | ล | - | ท | - | ล | - | ล | - | ล | - | ท | - | ล |   |   |   |   | 12 |   |   |
|     |   | ม |   | ร | ท |   | ล | ท |   | ล | ท |   | ช |   | ล | ท |   | ล | ร |   | ท |   | ล |   |   |   |   |   |   |   |   |    |   |   |
| 4.1 | - | ท | - | ท | - | ท | ท | - | ล | ล | ช | - | ด | ด | - | ร | ม |   | ร | - | ด | - | ท | - | ล |   |   |   |   |   |   | 13 |   |   |
|     |   | ร | ม |   | ร | ท |   |   | ล |   | ช |   | ด |   |   | ร | ม |   | ร | ด |   | ท |   | ล |   |   |   |   |   |   |   |    |   |   |
|     | - | - |   |   | - | ร | - | ม | - | - | ช | ท | - | ล | - | ท | - | ร | - | ท | - | ล | ล | - | ช | ช | - | ม |   |   |   | 14 |   |   |
|     |   | ล | ท |   | ล | ท |   | ช |   |   |   | ท | ล |   | ท | ท |   | ท | ล |   |   |   | ช |   |   |   | ท |   |   |   |   |    |   |   |
|     | - | ช | - | ม | - | ช | ช | - | ช | - | ล | - | ช | ช | - | - | ร | - | ม | ฟ | - | ท | ท | ล | ล |   | ล | ล |   |   |   | 15 |   |   |
|     |   | ช | ท |   | ช |   |   | ช | ล |   | ช |   |   | ท |   |   | ร |   |   |   |   | ฟ |   | ม | ร |   |   |   |   |   |   |    |   |   |
|     | - | ล | ล | - | ท | - | ช | - | ล | - | ท | - | ด | - | ร | - | ช | ช | - | ล | - | ท | - | ท | - | ท | - | ล | - | ช |   | 16 |   |   |
|     |   | ล |   |   | ท | ช |   | ล | ท |   | ด | ร |   | ช |   |   | ล | ท |   | ร | ท |   | ล | ช |   |   |   |   |   |   |   |    |   |   |
| 1.2 | - | ม | - |   | ร | ร | - |   | ช | ช | - | ล | - | ท | - | ท | - | ท | - | ท | - | ท | ท | - | ท | ท | - | ล | - | ช |   | 17 |   |   |
|     |   | ท | ล |   | ล | ช |   |   | ล |   | ท |   | ร | ม |   | ร | ท |   |   |   |   | ล |   |   | ช |   |   |   |   |   |   |    |   |   |
|     | - | ฟ | - |   | ฟ | ฟ | - |   | ม | ม | - | ร | ร | - | ท | - | ล | ล | - | ท | ท | - | ร | ร | - | ม |   |   |   |   |   | 18 |   |   |
|     |   | ด | ด |   | ด | ท |   | ท | ล |   | ล | ฟ |   | ฟ | ม |   | ม | ฟ |   | ฟ | ล |   | ล | ท |   | ล |   |   |   |   |   |    |   |   |

2.2

|     |       |         |         |       |       |       |       |
|-----|-------|---------|---------|-------|-------|-------|-------|
| - พ | - ม - | - ร - ร | - - - ช | - ม - | ร ร - | ช ช - | ล - ท |
| ม ร | ล     | ล       | ช       | ท ล   | ล ช   | ช ล   | ท     |

19

|       |         |         |         |         |       |       |       |
|-------|---------|---------|---------|---------|-------|-------|-------|
| - ล ท | - ร - ม | - ม - ม | - ร - ท | - ร - ม | - ร - | ท ท - | ล - ช |
| ช     | ร ม     | ช ม     | ร ท     | ร ม     | ร ท   | ท ล   | ช     |

20

|       |       |       |         |       |         |       |         |
|-------|-------|-------|---------|-------|---------|-------|---------|
| - ม - | ร ร - | ม ม - | ช - - ล | - ค ค | - ร - ม | ร - ค | - ท - ล |
| ท ล   | ล ท   | ท ช   | ล       | ค     | ร ม     | ร ค   | ท ล     |

21

|       |       |         |         |     |       |     |       |
|-------|-------|---------|---------|-----|-------|-----|-------|
| - - ร | - ม พ | - ท ล ล | - ล - ล | - ค | - - ร | - - | ร ม ช |
| ท     | ร     | พ       | ม ร     | ท ล | ท     | ท ท | ช     |

22

|         |       |       |         |     |         |       |       |
|---------|-------|-------|---------|-----|---------|-------|-------|
| - ท - ร | - ท - | ล ล - | ช ช - ม | - - | - ร - ม | - - ช | ท - ล |
| ท ท     | ท ล   | ช     | ท       | ล ท | ล ท     | ช     | ท ล   |

23

|         |       |       |       |         |       |       |         |
|---------|-------|-------|-------|---------|-------|-------|---------|
| - ท - ล | - ช - | พ พ - | ช - ล | - ล - ล | - ล - | ช - ล | - - - ท |
| ท ล     | ช พ   | ช     | ล     | ร ท     | ล ช   | ล     | ท       |

24

3.2

|       |       |       |           |        |       |       |       |
|-------|-------|-------|-----------|--------|-------|-------|-------|
| - ท - | ล ล - | ท ท - | ร - ร - ม | - - พพ | - ล - | ล พ ม | พ ม ร |
| ท ล   | ท     | ร     | ม         | พ      | ม     | ร     | ท     |

25

|        |     |     |     |         |       |       |         |
|--------|-----|-----|-----|---------|-------|-------|---------|
| - ท ทล | ล ล | ล ล | ล ล | - ล - ท | - ล - | พ พ - | ม ม - ร |
| พ      | ม ร | ท ร | ม พ | ล ท     | ล ค   | ค ท   | ท ร     |

26

|       |         |         |         |        |     |     |     |
|-------|---------|---------|---------|--------|-----|-----|-----|
| - ล ล | - ท - ช | - ล - ท | - ค - ร | - ท ทล | ล ล | ล ล | ล ล |
| ล ล   | ท ช     | ล ท     | ค ร     | พ      | ม ร | ท ร | ม พ |

27

|       |       |         |         |       |       |         |         |
|-------|-------|---------|---------|-------|-------|---------|---------|
| - ม พ | ล - ท | - ท - ท | - ล - พ | - - ร | - ม พ | - ท ล ล | - ล - ล |
| ร     | ล ท   | ร ท     | ล ค     | ท     | ร     | พ       | ม ร     |

28

4.2

|     |         |      |     |         |         |       |       |
|-----|---------|------|-----|---------|---------|-------|-------|
| - - | - ร - ม | พช ล | พ ม | - ท - ท | - ล - พ | - ม พ | ล - ท |
| ล ท | ม       | ม    | ร ท | ร ท     | ล ค     | ร     | ล ท   |

29

|       |       |       |         |         |       |       |       |
|-------|-------|-------|---------|---------|-------|-------|-------|
| - - ร | - ม พ | ท - ล | - พ - ม | - ร - ม | - ร - | ท ท - | ล ล ช |
| ท     | ร     | ท ล   | ค ท     | ร ม     | ร ท   | ล     | ช     |

30

|       |         |       |         |        |         |       |         |
|-------|---------|-------|---------|--------|---------|-------|---------|
| - ค ค | - ร - ม | ร - ค | - ท - ล | - - มร | - ร - ม | - - ช | ล ท - ล |
| ค     | ร ม     | ร ค   | ท ล     | ท      | ล ท     | ช     | ท ล     |

31

|         |         |         |         |
|---------|---------|---------|---------|
| - ท - ท | - ล - ล | - - - ล | ล ล ล ร |
| ร ท     | ล พ     | ม       | ร พ ม ล |

32 //



# Sadhukarn

Intro.

Boonthieng Sisakda I (LB1)

|     |          |         |          |           |          |          |          |         |    |
|-----|----------|---------|----------|-----------|----------|----------|----------|---------|----|
| R   | - - - ด  | - - - ร | - - - ร  | - ฟ - ช   | - ตํ - ล | - ช -    | ม ม -    | ร ร - ด | 0  |
| F   | ช        | ล       | ล        | ฟ         | ช        | ด        | ล        | ช       |    |
| 1.1 | - - -    | - -     | ด ด -    | ร ร - ม   | - ช - ล  | - ช -    | ม -      | ร ร - ด | 1  |
|     | ล        | ช       | ช        | ม         | ช        | ล        | ช        | ช       |    |
|     | - ม - ร  | - -     | - - -    | - ด - ร   | - ด - ฟ  | - ช - ล  | - ช -    | ล ล - ช | 2  |
|     |          | ด       | ล        | ช         | ล        | ช        | ฟ        | ช       |    |
|     | - ตํ - ํ | - ตํ -  | ล ล -    | ช ช - ฟ   | - ท ท    | - ตํ - ํ | - ตํ - ท | - ล - ช | 3  |
|     | ด        | ร       | ด        | ล         | ช        | ฟ        | ท        | ท       |    |
|     | - ร ริด  | ร ด - ร | - ช -    | ฟ ฟ - ช   | - ล - ล  | - ล -    | ช ช -    | ฟ ฟ - ร | 4  |
|     | ล        | ล       | ช        | ฟ         | ฟ        | ช        | ล        | ด       |    |
| 2.1 | - - - ช  | - ล ล   | - ช - ตํ | - ล ล     | - ฟ -    | ช ล - ตํ | - ํ - ตํ | - ล - ช | 5  |
|     | ช        | ล       | ล        | ช         | ด        | ล        | ล        | ด       |    |
|     | - ล - ตํ | - ล -   | ช ช -    | ฟ ฟ - ร   | - ร ริด  | ร ด - ร  | - ช -    | ฟ ฟ - ช | 6  |
|     | ล        | ด       | ล        | ช         | ฟ        | ฟ        | ล        | ล       |    |
|     | - - - ร  | - ด -   | ฟ ฟ -    | ช ช - ล   | - ตํ - ํ | - ตํ -   | ล ล -    | ช ช - ฟ | 7  |
|     | ล        | ช       | ฟ        | ฟ         | ช        | ล        | ด        | ร       |    |
|     | - - มร   | - ร -   | - ด - ด  | - - - ฟ   | - ช ช -  | ล - ฟ    | - ช - ล  | - ช - ล | 8  |
|     | ด        | ช       | ช        | ฟ         | ช        | ช        | ล        | ฟ       |    |
| 3.1 | - ล -    | ช ช -   | ล ล -    | ตํ ตํ - ํ | - - รม   | - ช -    | - ม - ร  | - - ล   | 9  |
|     | ล        | ช       | ช        | ล         | ด        | ร        | ด        | ล       |    |
|     | - ตํ - ํ | - ตํ -  | ล ล -    | ช ช - ฟ   | - ท ท    | - ตํ - ํ | - ตํ - ท | - ล - ช | 10 |
|     | ด        | ร       | ด        | ล         | ช        | ฟ        | ท        | ท       |    |
|     | - ร ริด  | ร ด - ร | - ช -    | ฟ ฟ - ช   | - ล - ล  | - ล -    | ช ช -    | ฟ ฟ - ร | 11 |
|     | ล        | ล       | ช        | ฟ         | ฟ        | ช        | ล        | ด       |    |
|     | - ม - ร  | - -     | - - -    | - ด - ร   | - ด - ฟ  | - ช - ล  | - ช -    | ล ล - ช | 12 |
|     |          | ด       | ล        | ช         | ล        | ช        | ฟ        | ช       |    |
| 4.1 | - ตํ - ํ | - ตํ -  | ล ล -    | ช ช - ฟ   | - ท ท    | - ตํ - ํ | - ตํ - ท | - ล - ช | 13 |
|     | ด        | ร       | ด        | ล         | ช        | ฟ        | ท        | ท       |    |
|     | - ร ริด  | ร ด - ร | - ช -    | ฟ ฟ - ช   | - ล - ล  | - ล -    | ช ช -    | ฟ ฟ - ร | 14 |
|     | ล        | ล       | ช        | ฟ         | ฟ        | ช        | ล        | ด       |    |
|     | - - - ฟ  | - ช ช   | - - - ล  | - ช ช     | - ตํ - ล | - ช -    | ม ม -    | ร ร - ด | 15 |
|     | ฟ        | ช       | ช        | ล         | ช        | ช        | ด        | ล       |    |
|     | - ช ช    | - ล - ฟ | - ช - ล  | - ท - ตํ  | - ท ทล   | - ม มร   | - -      | ด ร - ฟ | 16 |
|     | ช        | ล       | ฟ        | ช         | ล        | ท        | ด        | ช       |    |
| 1.2 | - - - ร  | - ด -   | ฟ ฟ -    | ช ช - ล   | - ตํ - ํ | - ตํ -   | ล ล -    | ช ช - ฟ | 17 |
|     | ล        | ช       | ฟ        | ฟ         | ช        | ล        | ด        | ร       |    |
|     | - - รม   | - ช -   | - ม - ร  | - -       | - ล -    | ช ช -    | ล ล -    | ด ด - ร | 18 |
|     | ด        | ร       |          | ด         | ล        | ม        | ม        | ม       |    |

2.2

|         |       |         |         |       |         |         |         |
|---------|-------|---------|---------|-------|---------|---------|---------|
| - - มริ | - ร - | - ด - ด | - - - ฟ | - ช ช | - ล - ฟ | - ช - ล | - ช - ล |
| ด       | ช     | ช       | ฟ       | ช ช   | ล ฟ     | ช ล     | ช ล     |

19

|       |         |         |         |       |         |         |         |
|-------|---------|---------|---------|-------|---------|---------|---------|
| - ช ล | - ด - ร | - ร ร ร | - ด - ล | - ฟ ฟ | - ช - ล | - ล ล ล | - ช - ฟ |
| ฟ     | ด ร     | ช ฟ ร   | ด ล     | ฟ     | ช ล     | ร ด ล   | ช ฟ     |

20

|       |       |       |         |         |         |         |         |
|-------|-------|-------|---------|---------|---------|---------|---------|
| - ร - | ด ด - | ร ร - | ฟ ฟ - ช | - ฟ - ช | - ล - ท | - ด - ท | - ล - ช |
| ล ช   | ด ล   | ร ฟ   | ฟ ช     | ฟ ช     | ล ท     | ด ท     | ล ช     |

21

|         |       |       |         |        |         |     |         |
|---------|-------|-------|---------|--------|---------|-----|---------|
| - ด - ล | - ช - | ม ม - | ร ร - ด | - ท ทล | - ม มริ | - - | ด ร - ฟ |
| ด ล     | ช ท   | ม ล   | ร ช     | ช      | ด       | ล ท | ด       |

22

|         |         |         |     |           |         |       |         |
|---------|---------|---------|-----|-----------|---------|-------|---------|
| - - ดริ | - ฟ - ช | - ล - ช | - ฟ | ร - ร ริค | ร ด - ร | - ช - | ฟ ฟ - ช |
| ท       | ฟ ช     | ล ช     | ฟ   | ล         | ช ล     | ช ฟ   | ฟ ช     |

23

|         |       |       |         |         |       |         |         |
|---------|-------|-------|---------|---------|-------|---------|---------|
| - ล - ช | - ฟ - | ม ม - | ฟ ฟ - ช | - - - ร | - ด - | ฟ - ช ล | - ช - ล |
| ล ช     | ฟ ท   | ม ฟ   | ฟ ช     | ล       | ช     | ฟ       | ล ช     |

24

3.2

|       |       |       |         |       |       |         |     |
|-------|-------|-------|---------|-------|-------|---------|-----|
| - ล - | ช ช - | ล ล - | ด ด - ร | - ร ม | - ช - | - ม - ร | - - |
| ล ช   | ล     | ด     | ร       | ด     | ร     |         | ด ล |

25

|       |     |       |         |         |       |     |         |
|-------|-----|-------|---------|---------|-------|-----|---------|
| - - - | - - | ด ด - | ร ร - ม | - ช - ล | - ช - | ม - | ร ร - ด |
| ล     | ช ช | ล     | ม       | ช ล     | ช ท   | ล   | ช       |

26

|       |         |         |         |         |         |         |         |
|-------|---------|---------|---------|---------|---------|---------|---------|
| - ช ช | - ล - ฟ | - ช - ล | - ท - ด | - ท - ล | - ช - ด | - ท - ล | - ช - ม |
| ช ช   | ล ฟ     | ช ล     | ท ด     | ท ล     | ช ด     | ท ล     | ช ท     |

27

|       |         |         |         |       |         |         |         |
|-------|---------|---------|---------|-------|---------|---------|---------|
| - ร ม | - ช - ล | - ล ล ล | - ช - ม | - ด ด | - ร - ม | - ช - ม | - ร - ด |
| ด     | ช ล     | ร ด ล   | ช ม     | ช     | ล ท     | ช ท     | ล ช     |

28

4.2

|       |       |       |         |         |       |         |       |
|-------|-------|-------|---------|---------|-------|---------|-------|
| - ล - | ช ช - | ล ล - | ด ด - ร | - - รริ | - ช - | - ม - ร | - - ล |
| ม ม   | ม     | ช     | ล       | ด       | ร     |         | ด ล   |

29

|         |       |       |         |         |     |       |         |
|---------|-------|-------|---------|---------|-----|-------|---------|
| - ด - ล | - ช - | ฟ ฟ - | ช ช - ล | - ม - ร | - - | - - - | - ด - ร |
| ด ล     | ช ฟ   | ฟ ช   | ช ล     |         | ด ล | ช ล   | ช ล     |

30

|         |         |         |         |       |         |         |         |
|---------|---------|---------|---------|-------|---------|---------|---------|
| - ด - ฟ | - ช - ล | - ด - ล | - ช - ฟ | - ท ท | - ด - ร | - ด - ท | - ล - ช |
| ช ฟ     | ช ล     | ด ล     | ช ฟ     | ท ท   | ด ร     | ด ท     | ล ช     |

31

|         |         |       |         |         |         |         |         |
|---------|---------|-------|---------|---------|---------|---------|---------|
| - ร ริค | ร ด - ร | - ช - | ฟ ฟ - ช | - ด - ล | - ช - ม | - - - ร | - - - ด |
| ล       | ช ล     | ช ฟ   | ฟ ช     | ด ล     | ช ท     | ล       | ช       |

32 //

## Sadhukarn

## Intro.

**Boonthieng Sisakda II (LB2)**

|     |   |   |   |   |   |   |   |   |   |   |   |   |   |   |   |   |   |   |   |   |   |   |   |   |   |   |   |   |   |   |    |    |   |
|-----|---|---|---|---|---|---|---|---|---|---|---|---|---|---|---|---|---|---|---|---|---|---|---|---|---|---|---|---|---|---|----|----|---|
| R   | - | - | - | ด | - | - | - | ร | - | - | - | ร | - | ฟ | - | ช | - | ด | - | ล | - | ช | - | ม | ม | - | ร | ร | - | ด | 0  |    |   |
|     | F |   |   | ช |   |   |   | ล |   |   |   | ล |   | ฟ |   | ช |   | ด |   | ล |   | ช |   | ท |   |   | ล |   |   | ช |    |    |   |
| 1.1 | - | - | - |   | - | - |   |   | ด | ด | - |   | ร | ร | - | ม | - | ช | - | ล | - | ช | - | ม | - |   | ร | ร | - | ด | 1  |    |   |
|     |   |   |   | ล |   | ช |   | ช |   |   |   | ล |   | ม |   |   |   | ช |   | ล |   | ช |   | ท |   |   | ล |   |   | ช |    |    |   |
| 2   | - | ม | - | ร | - | - |   |   | - | ด | - | ร | - | ด | - | ฟ | - | ช | - | ล | - | ช | - | ล | ล | - | ช |   |   |   | 2  |    |   |
|     |   |   |   |   | ด |   | ล |   | ช |   | ล |   | ช |   | ล |   | ช |   | ฟ |   | ช |   | ล |   | ช |   | ล |   | ล |   |    | ช  |   |
| 3   | - | ด | - | ร | - | ด | - |   | ล | ล | - |   | ช | ช | - | ฟ | - | ท | ท | - | ด | - | ร | - | ด | - | ท | - | ล | - | ช  | 3  |   |
|     |   | ด |   | ร |   | ด |   | ล |   | ล |   | ช |   | ช |   | ฟ |   | ท |   | ท |   | ด |   | ร |   | ด |   | ท |   | ล |    |    | ช |
| 4   | - | ร | ร | ด | ร | ร | ด | - | ร | - | ช | - |   | ฟ | ฟ | - | ช | - | ล | - | ล | - | ล | - | ช | ช | - | ฟ | ฟ | - | ร  | 4  |   |
|     |   | ล |   | ล |   | ช |   | ล |   | ช |   | ฟ |   | ฟ |   | ช |   | ล |   | ด |   | ล |   | ช |   | ช |   | ฟ |   | ฟ |    |    | ล |
| 2.1 | - | - | - | ช | - | ล | ล | - | ช | - | ด | - | ล | ล | - | ฟ | - | ช | ล | - | ด | - | ร | - | ร | - | ด | - | ล | - | ช  | 5  |   |
|     |   |   |   | ช |   | ล |   | ล |   | ช |   | ด |   | ล |   | ล |   | ด |   | ฟ |   |   |   | ด |   | ร |   | ด |   | ล |    |    | ช |
| 6   | - | ล | - | ด | - | ล | - |   | ช | ช | - |   | ฟ | ฟ | - | ร | - | ร | ร | ด | ร | - | ช | - | ฟ | ฟ | - | ช |   |   |    | 6  |   |
|     |   | ล |   | ด |   | ล |   | ช |   | ช |   | ฟ |   | ฟ |   | ล |   | ล |   | ล |   | ช |   | ล |   | ช |   | ฟ |   | ฟ |    |    | ช |
| 7   | - | - | - | ร | - | ด | - |   | ฟ | ฟ | - |   | ช | ช | - | ล | - | ด | - | ร | - | ด | - | ล | ล | - | ช | ช | - | ฟ |    | 7  |   |
|     |   |   |   | ล |   | ช |   | ฟ |   | ฟ |   | ช |   | ช |   | ล |   | ด |   | ร |   | ด |   | ล |   | ล |   | ช |   | ช |    |    | ด |
| 8   | - | - | ม | ร | - | ร | - |   | - | ด | - | ด | - | - | - | ฟ | - | ช | ช | - | ล | - | ฟ | - | ช | - | ล | - | ช | - | ล  | 8  |   |
|     |   |   |   | ด |   |   |   | ช |   | ช |   |   |   |   |   | ฟ |   | ช |   | ช |   | ล |   | ฟ |   | ช |   | ล |   | ช |    |    | ล |
| 3.1 | - | ล | - |   | ช | ช | - |   | ล | ล | - |   | ด | ด | - | ร | - | - | ร | ม | - | ช | - | - | ม | - | ร | - | - | ล | 9  |    |   |
|     |   | ล |   | ช |   | ช |   | ล |   | ล |   | ด |   | ด |   | ร |   | ด |   |   |   | ร |   |   |   |   |   |   | ด |   |    | ล  |   |
| 10  | - | ด | - | ร | - | ด | - |   | ล | ล | - |   | ช | ช | - | ฟ | - | ท | ท | - | ด | - | ร | - | ด | - | ท | - | ล | - | ช  | 10 |   |
|     |   | ด |   | ร |   | ด |   | ล |   | ล |   | ช |   | ช |   | ฟ |   | ท |   | ท |   | ด |   | ร |   | ด |   | ท |   | ล |    |    | ช |
| 11  | - | ร | ร | ด | ร | ร | ด | - | ร | - | ช | - |   | ฟ | ฟ | - | ช | - | ล | - | ล | - | ล | - | ช | ช | - | ฟ | ฟ | - | ร  | 11 |   |
|     |   | ล |   | ล |   | ช |   | ล |   | ช |   | ฟ |   | ฟ |   | ช |   | ล |   | ด |   | ล |   | ช |   | ช |   | ฟ |   | ฟ |    |    | ล |
| 12  | - | ม | - | ร | - | - |   |   | - | ด | - | ร | - | ด | - | ฟ | - | ช | - | ล | - | ช | - | ล | ล | - | ช |   |   |   |    | 12 |   |
|     |   |   |   |   | ด |   | ล |   | ช |   | ล |   | ช |   | ล |   | ช |   | ฟ |   | ช |   | ล |   | ช |   | ล |   | ล |   | ล  |    |   |
| 4.1 | - | ด | - | ร | - | ด | - |   | ล | ล | - |   | ช | ช | - | ฟ | - | ท | ท | - | ด | - | ร | - | ด | - | ท | - | ล | - | ช  | 13 |   |
|     |   | ด |   | ร |   | ด |   | ล |   | ล |   | ช |   | ช |   | ฟ |   | ท |   | ท |   | ด |   | ร |   | ด |   | ท |   | ล |    |    | ช |
| 14  | - | ร | ร | ด | ร | ร | ด | - | ร | - | ช | - |   | ฟ | ฟ | - | ช | - | ล | - | ล | - | ล | - | ช | ช | - | ฟ | ฟ | - | ร  | 14 |   |
|     |   | ล |   | ล |   | ช |   | ล |   | ช |   | ฟ |   | ฟ |   | ช |   | ล |   | ด |   | ล |   | ช |   | ช |   | ฟ |   | ฟ |    |    | ล |
| 15  | - | - | - | ฟ | - | ช | ช | - | - | - | ล | - | ช | ช | - | ด | - | ล | - | ช | - | ม | ม | - | ร | ร | - | ด |   |   |    | 15 |   |
|     |   |   |   | ฟ |   | ช |   | ช |   |   |   | ล |   | ช |   | ช |   | ด |   | ล |   | ช |   | ท |   |   | ล |   |   |   | ช  |    |   |
| 16  | - | ช | ช | - | ล | - | ฟ | - | ช | - | ล | - | ท | - | ด | - | ท | ท | ล | - | ม | ม | ร | - | - |   | ด | ร | - | ฟ | 16 |    |   |
|     |   | ช |   |   | ล |   | ฟ |   | ช |   | ล |   | ท |   | ด |   | ช |   |   |   | ด |   |   |   | ล |   | ท |   |   | ด |    |    |   |
| 17  | - | - | - | ร | - | ด | - |   | ฟ | ฟ | - |   | ช | ช | - | ล | - | ด | - | ร | - | ด | - | ล | ล | - | ช | ช | - | ฟ | 17 |    |   |
|     |   |   |   | ล |   | ช |   | ฟ |   | ฟ |   | ช |   | ช |   | ล |   | ด |   | ร |   | ด |   | ล |   | ล |   | ช |   | ช |    |    | ด |
| 18  | - | - | - | ร | ม | - | ช | - | - | ม | - | ร | - | - | ล | - | ช | ช | - | ล | ล | - | ด | ด | - | ร |   |   |   |   | 18 |    |   |
|     |   |   |   | ด |   |   |   | ร |   |   |   |   | ด |   | ล |   | ม |   | ม |   |   |   | ม |   | ช |   |   |   |   | ล |    |    |   |

2.2

|         |        |         |         |       |         |         |         |
|---------|--------|---------|---------|-------|---------|---------|---------|
| - - มริ | - ริ - | - ด - ด | - - - พ | - ช ช | - ล - พ | - ช - ล | - ช - ล |
| ด       | ช      | ช       | พ       | ช ช   | ล พ     | ช ล     | ช ล     |

19

|       |         |         |         |       |         |         |         |
|-------|---------|---------|---------|-------|---------|---------|---------|
| - ช ล | - ด - ร | - ร ร ร | - ด - ล | - พ พ | - ช - ล | - ล ล ล | - ช - พ |
| พ     | ด ร     | ช พ ร   | ด ล     | พ     | ช ล     | ร ด ล   | ช พ     |

20

|        |       |        |         |         |         |         |         |
|--------|-------|--------|---------|---------|---------|---------|---------|
| - ริ - | ด ด - | ร ริ - | พ พ - ช | - พ - ช | - ล - ท | - ด - ท | - ล - ช |
| ล ช    | ด ล   | ร พ    | พ ช     | พ ช     | ล ท     | ด ท     | ล ช     |

21

|         |       |       |          |        |         |     |         |
|---------|-------|-------|----------|--------|---------|-----|---------|
| - ด - ล | - ช - | ม ม - | ร ริ - ด | - ท ทล | - ม มริ | - - | ด ร - พ |
| ด ล     | ช ท   | ม ล   | ร ช      | ช      | ด       | ล ท | ด       |

22

|         |         |         |     |   |         |         |       |         |
|---------|---------|---------|-----|---|---------|---------|-------|---------|
| - - ดริ | - พ - ช | - ล - ช | - พ | ร | - ร ริค | ร ด - ร | - ช - | พ พ - ช |
| ท       | พ ช     | ล ช     | พ   | ล | ล ล     | ช ล     | ช พ   | พ ช     |

23

|         |       |       |         |         |       |         |         |
|---------|-------|-------|---------|---------|-------|---------|---------|
| - ล - ช | - พ - | ม ม - | พ พ - ช | - - - ร | - ด - | พ - ช ล | - ช - ล |
| ล ช     | พ ท   | ม พ   | พ ช     | ล       | ช     | พ ล     | ช ล     |

24

3.2

|       |       |       |         |       |       |         |     |
|-------|-------|-------|---------|-------|-------|---------|-----|
| - ล - | ช ช - | ล ล - | ด ด - ร | - ร ม | - ช - | - ม - ร | - - |
| ล ช   | ล     | ด     | ร       | ด     | ร     |         | ด ล |

25

|       |     |       |          |         |       |     |          |
|-------|-----|-------|----------|---------|-------|-----|----------|
| - - - | - - | ด ด - | ร ริ - ม | - ช - ล | - ช - | ม - | ร ริ - ด |
| ล     | ช ช | ล     | ม        | ช ล     | ช ท   | ล   | ช        |

26

|       |         |         |         |         |         |         |         |
|-------|---------|---------|---------|---------|---------|---------|---------|
| - ช ช | - ล - พ | - ช - ล | - ท - ด | - ท - ล | - ช - ด | - ท - ล | - ช - ม |
| ช ช   | ล พ     | ช ล     | ท ด     | ท ล     | ช ด     | ท ล     | ช ท     |

27

|       |         |         |         |       |         |         |         |
|-------|---------|---------|---------|-------|---------|---------|---------|
| - ร ม | - ช - ล | - ล ล ล | - ช - ม | - ด ด | - ร - ม | - ช - ม | - ร - ด |
| ด     | ช ล     | ร ด ล   | ช ม     | ช     | ล ท     | ช ท     | ล ช     |

28

4.2

|       |       |       |         |         |       |         |       |
|-------|-------|-------|---------|---------|-------|---------|-------|
| - ล - | ช ช - | ล ล - | ด ด - ร | - - รริ | - ช - | - ม - ร | - - ล |
| ม ม   | ม     | ช     | ล       | ด       | ร     |         | ด ล   |

29

|         |       |       |         |         |     |       |         |
|---------|-------|-------|---------|---------|-----|-------|---------|
| - ด - ล | - ช - | พ พ - | ช ช - ล | - ม - ร | - - | - - - | - ด - ร |
| ด ล     | ช พ   | พ ช   | ช ล     |         | ด ล | ช ล   | ช ล     |

30

|         |         |       |         |         |       |       |         |
|---------|---------|-------|---------|---------|-------|-------|---------|
| - ด - พ | - ช - ล | - ช - | ล ล - ช | - ด - ร | - ด - | ล ล - | ช ช - พ |
| ช พ     | ช ล     | ช ล   | ล ช     | ด ร     | ด ล   | ล ช   | ช พ     |

31

|       |         |         |         |         |         |       |         |
|-------|---------|---------|---------|---------|---------|-------|---------|
| - ท ท | - ด - ร | - ด - ท | - ล - ช | - ร ริค | ร ด - ร | - ช - | พ พ - ช |
| ท ท   | ด ร     | ด ท     | ล ช     | ล ล     | ช ล     | ช พ   | พ ช     |

32

|         |         |         |         |
|---------|---------|---------|---------|
| - ด - ล | - ช - ม | - - - ร | - - - ด |
| ด ล     | ช ท     | ล       | ช       |

33 //

# Sadhukarn

Intro.

Boonthieng Sisakda III (LB3)

|     |          |         |          |           |          |          |           |         |    |
|-----|----------|---------|----------|-----------|----------|----------|-----------|---------|----|
| R   | - - - ร  | - - - ม | - - - ม  | - ช - ล   | - รั - ท | - ล -    | ฟ ฟ -     | ม ม - ร | 0  |
| F   | ล        | ท       | ม        | ช ล       | ร ท      | ล ด      | ท         | ล       |    |
| 1.1 | - - -    | - -     | ร ร -    | ม ม - ฟ   | - ล - ท  | - ล -    | ฟ ฟ -     | ม ม - ร | 1  |
|     | ท        | ล ล     | ท        | ฟ         | ล ท      | ล ด      | ท         | ล       |    |
|     | - ฟ - ม  | - -     | - - -    | - ร - ม   | - ร - ช  | - ล - ท  | - ล -     | ท ท - ล | 2  |
|     |          | ร ท     | ล ท      | ล ท       | ล ช      | ล ท      | ล ท       | ท ล     |    |
|     | - รั - ม | - รั -  | ท ท -    | ล ล - ช   | - ดั ดั  | - รั - ม | - รั - ดั | - ท - ล | 3  |
|     | ร ม      | ร ท     | ท ล      | ล ช       | ด ด      | ร ม      | ร ด       | ท ล     |    |
|     | - ม มร   | ม ร - ม | - ล -    | ช ช - ล   | - ท - ท  | - ท -    | ล ล -     | ช ช - ม | 4  |
|     | ท ท      | ล ท     | ล ช      | ช ล       | ท ร      | ท ล      | ล ช       | ช ท     |    |
| 2.1 | - - - ล  | - ท ท   | - ล - รั | - ท ท     | - ช -    | ล ท - รั | - ม - รั  | - ท - ล | 5  |
|     | ล        | ท ท     | ล ร      | ท ท       | ร ช      | ร        | ม ร       | ท ล     |    |
|     | - ท - รั | - ท -   | ล ล -    | ช ช - ม   | - ม มร   | ม ร - ม  | - ล -     | ช ช - ล | 6  |
|     | ท ร      | ท ล     | ล ช      | ช ท       | ท ท      | ล ท      | ล ช       | ช ล     |    |
|     | - - - ม  | - ร -   | ช ช -    | ล ล - ท   | - รั - ม | - รั -   | ท ท -     | ล ล - ช | 7  |
|     | ท        | ล ช     | ช ล      | ล ท       | ร ม      | ร ท      | ท ล       | ล ร     |    |
|     | - - ฟม   | - ม -   | - ร - ร  | - - - ช   | - ล ล    | - ท - ช  | - ล - ท   | - ล - ท | 8  |
|     | ร        | ล       | ล        | ช         | ล ล      | ท ช      | ล ท       | ล ท     |    |
| 3.1 | - ท -    | ล ล -   | ท ท -    | รั รั - ม | - - มฟ   | - ล -    | - ฟ - ม   | - - ท   | 9  |
|     | ท ล      | ล ท     | ท ร      | ร ม       | ร        | ม        |           | ร ท     |    |
|     | - รั - ม | - รั -  | ท ท -    | ล ล - ช   | - ดั ดั  | - รั - ม | - รั - ดั | - ท - ล | 10 |
|     | ร ม      | ร ท     | ท ล      | ล ช       | ด ด      | ร ม      | ร ด       | ท ล     |    |
|     | - ม มร   | ม ร - ม | - ล -    | ช ช - ล   | - ท - ท  | - ท -    | ล ล -     | ช ช - ม | 11 |
|     | ท ท      | ล ท     | ล ช      | ช ล       | ท ร      | ท ล      | ล ช       | ช ท     |    |
|     | - ฟ - ม  | - -     | - - -    | - ร - ม   | - ร - ช  | - ล - ท  | - ล -     | ท ท - ล | 12 |
|     |          | ร ท     | ล ท      | ล ท       | ล ช      | ล ท      | ล ท       | ท ล     |    |
| 4.1 | - รั - ม | - รั -  | ท ท -    | ล ล - ช   | - ดั ดั  | - รั - ม | - รั - ดั | - ท - ล | 13 |
|     | ร ม      | ร ท     | ท ล      | ล ช       | ด ด      | ร ม      | ร ด       | ท ล     |    |
|     | - ม มร   | ม ร - ม | - ล -    | ช ช - ล   | - ท - ท  | - ท -    | ล ล -     | ช ช - ม | 14 |
|     | ท ท      | ล ท     | ล ช      | ช ล       | ท ร      | ท ล      | ล ช       | ช ท     |    |
|     | - - - ช  | - ล ล   | - - - ท  | - ล ล     | - รั - ท | - ล -    | ฟ ฟ -     | ม ม - ร | 15 |
|     | ช        | ล ล     | ท        | ล ล       | ร ท      | ล ด      | ท         | ล       |    |
|     | - ล ล    | - ท - ช | - ล - ท  | - ดั - รั | - ด ดท   | - ฟ ฟม   | - -       | ร ม - ช | 16 |
|     | ล        | ท ช     | ล ท      | ด ร       | ล        | ร        | ท ด       | ร       |    |
| 1.2 | - - - ม  | - ร -   | ช ช -    | ล ล - ท   | - รั - ม | - รั -   | ท ท -     | ล ล - ช | 17 |
|     | ท        | ล ช     | ช ล      | ล ท       | ร ม      | ร ท      | ท ล       | ล ช     |    |
|     | - ม ฟ    | - ล -   | - ฟ - ม  | - -       | - ท -    | ล ล -    | ท ท -     | ร ร - ม | 18 |
|     | ร        | ม       |          | ร ท       | ท ม      | ฟ        | ล         | ท       |    |

2.2

19

# Sadhukarn

Intro.

Boonyadet Muensanit (LY)

|     |   |           |         |         |         |           |           |         |         |         |    |    |   |   |  |
|-----|---|-----------|---------|---------|---------|-----------|-----------|---------|---------|---------|----|----|---|---|--|
|     | R | - - - ร   | - - - ม | - - - ช | - - - ล | - - - ม   | - - - ร   | - - - ช | - - - ล | - - - ร |    |    |   |   |  |
|     | F | ล         | ท       | ช       | ล       | ม         | ร         | ท       | ล       | ช       | ล  |    |   |   |  |
|     |   |           |         |         |         |           |           |         |         |         | 0  |    |   |   |  |
| 1.1 |   | - - ดท    | - ท - ร | - - ม พ | - ม - พ | - ล - ท   | - ล -     | พ พ -   | ม ม - ร |         | 1  |    |   |   |  |
|     |   | ล         | ล       | ด       | ท       | ล         | ท         | ล       | ด       | ท       | ล  |    |   |   |  |
|     |   | ล พ       | พ ม     | ร ร     | ม ร - ม | ม ร       | ม ร - ม   | ม ช     | ล ท - ล |         | 2  |    |   |   |  |
|     |   | ล ม       | ร ท     | ล ท     | ล ท     | ท         | ล ท       | ท ช     | ท ล     |         |    |    |   |   |  |
|     |   | - - ร - ม | - - ร - | ท ท -   | ล ล - ช | - - -     | - - -     | - - ร - | - - ร - | - - ร - | 3  |    |   |   |  |
|     |   | ร ม       | ร ท     | ท ล     | ล ช     | ด         | ม         | ร       | ด       | ท ล     |    |    |   |   |  |
|     |   | - - มร    | ม ร - ม | - ม ช   | ล ท - ล | - ท - ท   | - ท -     | - ล ล   | ช ช - ม |         | 4  |    |   |   |  |
|     |   | ท         | ล ท     | ท ช     | ท ล     | ท ร       | ท ล       | ล ช     | ช ท     |         |    |    |   |   |  |
| 2.1 |   | - ม - ล   | - ท ท   | - ล - ท | - ท ท   | - - ช     | - - ล ท   | - ท - ท | - ท - ล |         | 5  |    |   |   |  |
|     |   | ล         | ท       | ล       | ร       | ช         | ท         | ม       | ร       | ท ล     |    |    |   |   |  |
|     |   | - - ช ช   | - ล - ท | - ล - ช | - พ - ม | - - มรท   | - - ร - ม | - ม ช   | ล ท - ล |         | 6  |    |   |   |  |
|     |   | ช ช       | ล ท     | ล ช     | ด ท     | พ         | ล         | ท       | ช       | ท ล     |    |    |   |   |  |
|     |   | - - - ร   | - - ช ช | - ท ล   | ล - - ท | - - ร - ม | - - ร -   | - ท ท   | ล ล - ช |         | 7  |    |   |   |  |
|     |   | ล         | ช ช     | ท ล     | ท       | ร ม       | ร ท       | ท ล     | ล ช     |         |    |    |   |   |  |
|     |   | - - พ พ   | - ม - ร | - ร -   | ร - ช   | - - ล ล   | - ท -     | ช ช -   | ล ล - ท |         | 8  |    |   |   |  |
|     |   | ด         | ด       | ท       | ล       | ด         | ช         | ล       | ท       | ช       |    |    |   |   |  |
| 3.1 |   | - - - ช   | - ล - ท | - ล - ท | - ร - ม | - - ม พ   | - ล -     | - พ - ม | - - ท   |         | 9  |    |   |   |  |
|     |   | ช         | ล       | ท       | ล       | ร         | ม         | ร       | ท       |         |    |    |   |   |  |
|     |   | - - ร - ม | - - ร - | ท ท -   | ล ล - ช | - - -     | - - ร -   | - - ร - | - - ร - |         | 10 |    |   |   |  |
|     |   | ร ม       | ร ท     | ท ล     | ล ช     | ด         | ม         | ร       | ด       | ท ล     |    |    |   |   |  |
|     |   | - - มร    | ม ร - ม | - - ล   | ช ช - ล | - ท - ร   | - ท -     | - ล ล   | ช ช - ม |         | 11 |    |   |   |  |
|     |   | ท         | ล       | ช       | ช       | ท         | ล         | ล       | ช       | ท       |    |    |   |   |  |
|     |   | พ ล       | พ ม     | ร ร     | ม ร - ม | ม ร       | ม ร - ม   | ม ช     | ล ท - ล |         | 12 |    |   |   |  |
|     |   | พ         | ม       | ร       | ล       | ท         | ล         | ท       | ช       | ท ล     |    |    |   |   |  |
| 4.1 |   | - - ร - ม | - - ร - | ท ท -   | ล ล - ช | - - -     | - - ร -   | - - ร - | - - ร - |         | 13 |    |   |   |  |
|     |   | ร ม       | ร ท     | ท ล     | ล ช     | ด         | ม         | ร       | ด       | ท ล     |    |    |   |   |  |
|     |   | - - มร    | ม ร - ม | - - ล   | ช ช - ล | - ท - ท   | - ท -     | - ล ล   | ช ช - ม |         | 14 |    |   |   |  |
|     |   | ท         | ล       | ช       | ช       | ท         | ล         | ล       | ช       | ท       |    |    |   |   |  |
|     |   | - - -     | ร -     | - - ช   | - - ช   | - - ช     | - - ร     | - - ม พ | - ท ล   | ล ล ล   | 15 |    |   |   |  |
|     |   | ท         | ช       | ล       | ช       | ด         | ล         | พ       | ม       | ร       |    |    |   |   |  |
|     |   | - - - ร   | - - -   | - - ช   | - - ล   | - - -     | - - -     | - - -   | - - -   | - - -   | 16 |    |   |   |  |
|     |   | ท         | ท       | ช       | ล       | ด         | ร         | ช       | ม       | ร       | ท  | ล  | ล | ช |  |
| 1.2 |   | - - ร -   | - - -   | ช - ท   | ล ล - ท | - - ร -   | - - -     | - - -   | - - -   | - - -   |    | 17 |   |   |  |
|     |   | ร         | ท       | ล       | ช       | ล         | ท         | ร       | ม       | ร       | ท  | ล  | ล | ช |  |
|     |   | - - -     | - - -   | - - -   | - - -   | - - -     | - - -     | - - -   | - - -   | - - -   |    | 18 |   |   |  |
|     |   | ล         | ร       | พ       | ม       | ร         | ล         | พ       | ม       | ร       | ล  | ล  | ล | ล |  |

2.2

|   |   |    |   |    |   |    |   |   |   |   |    |   |    |   |   |   |    |   |    |   |    |   |   |   |    |   |    |
|---|---|----|---|----|---|----|---|---|---|---|----|---|----|---|---|---|----|---|----|---|----|---|---|---|----|---|----|
| - | - | ລ  | - | ທ  | - | ຣ  | - | ທ | - | - | ຣມ | - | ຮ  | - | ທ | - | ທ  | - | ລ  | - | -  | ຮ | ຮ | ລ | ລ  | - | ທ  |
|   |   | ລຸ |   | ທຸ |   | ລຸ |   |   |   |   | ດ  |   | ຮຸ |   | ຣ |   | ທຸ |   | ລຸ |   | ຮຸ |   | ຮ |   | ລຸ |   | ທຸ |

19

|   |   |   |   |   |    |   |    |   |    |   |    |   |    |   |   |    |   |    |   |    |   |    |   |    |   |   |   |    |   |    |   |    |
|---|---|---|---|---|----|---|----|---|----|---|----|---|----|---|---|----|---|----|---|----|---|----|---|----|---|---|---|----|---|----|---|----|
| - | - | ລ | ທ | - | ຣີ | - | ມີ | - | ມີ | - | ມີ | - | ຣີ | - | ທ | -  | - | ມີ | - | ມີ | - | ມີ | - | ຣີ | - | ທ | - | ລ  | - | ຮ  |   |    |
|   |   | ຮ |   |   |    | ຣ |    | ມ |    | ຮ |    | ມ |    | ຣ |   | ທຸ |   | ມ  |   | ມ  |   | ຮ  |   | ມ  |   | ຣ |   | ທຸ |   | ລຸ | - | ຮຸ |

20

|   |   |    |   |    |   |    |   |    |   |    |   |    |   |    |   |    |   |    |   |    |   |    |    |   |    |   |    |   |   |    |   |    |
|---|---|----|---|----|---|----|---|----|---|----|---|----|---|----|---|----|---|----|---|----|---|----|----|---|----|---|----|---|---|----|---|----|
| - | - | ຣ  | ຣ | -  | - | ມ  | ມ | -  | - | ຮ  | ຮ | -  | - | ລ  | ລ | -  | ຮ | -  | ລ | -  | ທ | -  | ຣີ | - | ມີ | - | ຣີ | - | ທ | -  | ລ |    |
|   |   | ລຸ |   | ລຸ |   | ທຸ |   | ທຸ |   | ຮຸ |   | ຮຸ |   | ລຸ |   | ລຸ |   | ຮຸ |   | ລຸ |   | ທຸ |    | ຣ |    | ມ |    | ຣ |   | ທຸ |   | ລຸ |

21

|   |   |    |   |   |   |   |   |   |   |   |   |   |   |   |    |    |   |    |   |    |   |   |   |    |   |    |  |    |  |    |
|---|---|----|---|---|---|---|---|---|---|---|---|---|---|---|----|----|---|----|---|----|---|---|---|----|---|----|--|----|--|----|
| - | - | ຣ  | - | - | ມ | ຟ | - | ທ | ລ | ລ | ລ | ລ | - | - | ມຣ | -  | - | ຣ  | - | ມ  | ຣ | ຣ | ຣ | -  | ຮ |    |  |    |  |    |
|   |   | ລຸ |   |   |   | ຣ |   |   |   | ຟ |   | ມ |   | ຣ |    | ລຸ |   | ທຸ |   | ລຸ |   |   |   | ລຸ |   | ລຸ |  | ຮຸ |  | ຮຸ |

22

|   |   |    |   |    |   |   |   |    |   |    |   |    |   |   |    |   |    |   |    |   |    |   |    |   |    |   |    |  |    |
|---|---|----|---|----|---|---|---|----|---|----|---|----|---|---|----|---|----|---|----|---|----|---|----|---|----|---|----|--|----|
| - | - | ທ  | - | ທ  | - | - | ລ | ລ  | ຮ | ຮ  | - | ມ  | - | - | ມຣ | ທ | -  | ຣ | -  | ມ | -  | ລ | -  | ຮ | ຮ  | - | ລ  |  |    |
|   |   | ທຸ |   | ທຸ |   | ຣ |   | ລຸ |   | ຮຸ |   | ທຸ |   |   | ຟ  |   | ລຸ |   | ທຸ |   | ລຸ |   | ຮຸ |   | ຮຸ |   | ຮຸ |  | ຮຸ |

23

|   |    |   |    |   |    |   |   |   |   |   |    |   |    |   |    |   |    |   |    |   |    |   |    |   |    |   |    |   |
|---|----|---|----|---|----|---|---|---|---|---|----|---|----|---|----|---|----|---|----|---|----|---|----|---|----|---|----|---|
| - | ທ  | - | ລ  | - | ຮ  | - | ຟ | - | - | ມ | ຟ  | - | ຮ  | - | ລ  | - | ມ  | - | ຣ  | ຣ | -  | - | ຮ  | ຮ | ລ  | ລ | -  | ທ |
|   | ທຸ |   | ລຸ |   | ຮຸ |   |   |   | ຣ |   | ຮຸ |   | ທຸ |   | ລຸ |   | ທຸ |   | ລຸ |   | ຮຸ |   | ຮຸ |   | ລຸ |   | ທຸ |   |

24

3.2

|   |   |    |   |    |   |    |   |    |   |    |   |    |   |    |   |   |   |   |   |   |   |   |   |   |   |   |   |    |
|---|---|----|---|----|---|----|---|----|---|----|---|----|---|----|---|---|---|---|---|---|---|---|---|---|---|---|---|----|
| - | - | ຮ  | - | ລ  | - | ທ  | - | ລ  | - | ທ  | - | ຣ  | - | ມ  | - | ມ | ຟ | - | ລ | - | - | ຟ | - | ມ | - | - | ທ |    |
|   |   | ຮຸ |   | ລຸ |   | ທຸ |   | ລຸ |   | ທຸ |   | ລຸ |   | ທຸ |   | ຣ |   |   |   | ມ |   |   |   |   |   | ຣ |   | ທຸ |

25

|   |   |   |   |    |   |   |   |    |   |   |   |    |   |   |   |    |   |    |   |    |   |    |   |   |   |   |    |   |
|---|---|---|---|----|---|---|---|----|---|---|---|----|---|---|---|----|---|----|---|----|---|----|---|---|---|---|----|---|
| - | ທ | - | - | ຣ  | - | ຣ | - | ມ  | - | ຟ | - | ມ  | - | ຟ | - | ລ  | - | ທ  | - | ລ  | - | ຟ  | ຟ | - | ມ | ມ | -  | ຣ |
|   |   |   |   | ລຸ |   |   |   | ທຸ |   | ດ |   | ທຸ |   | ດ |   | ລຸ |   | ທຸ |   | ລຸ |   | ດຸ |   |   |   |   | ລຸ |   |

26

|   |   |   |   |    |   |    |   |    |   |    |   |    |   |    |   |   |   |    |   |    |   |   |    |    |   |    |   |    |
|---|---|---|---|----|---|----|---|----|---|----|---|----|---|----|---|---|---|----|---|----|---|---|----|----|---|----|---|----|
| - | - | - | - | ດີ | - | ດີ | - | ຮ  | - | ດີ | - | ຣີ | - | ມີ | - | ຮ | - | ມີ | - | ຣີ | - | - | ດີ | ດີ | ທ | ທ  | - | ລ  |
|   |   |   |   | ດ  |   | ດ  |   | ຮຸ |   | ດ  |   | ຣ  |   | ມ  |   | ມ |   | ມ  |   | ຣ  |   | ດ |    | ດ  |   | ທຸ |   | ທຸ |

27

|   |    |   |    |   |    |   |    |   |    |   |    |   |    |   |   |    |   |    |   |    |   |    |   |    |    |   |    |   |
|---|----|---|----|---|----|---|----|---|----|---|----|---|----|---|---|----|---|----|---|----|---|----|---|----|----|---|----|---|
| - | ຣີ | - | ມີ | - | ຣີ | - | -  | ທ | ທ  | ລ | ລ  | - | ຮ  | - | - | ດີ | - | ຣີ | - | ມີ | - | ຣີ | - | ດີ | -  | ທ | -  | ລ |
|   | ຣ  |   | ມ  |   | ຣ  |   | ທຸ |   | ທຸ |   | ລຸ |   | ຮຸ |   | ດ |    | ຣ |    | ມ |    | ຣ |    | ດ |    | ທຸ |   | ທຸ |   |

28

|   |   |    |   |    |   |    |   |    |   |    |   |    |   |   |   |    |   |    |   |   |   |   |   |    |   |   |   |    |
|---|---|----|---|----|---|----|---|----|---|----|---|----|---|---|---|----|---|----|---|---|---|---|---|----|---|---|---|----|
| - | - | ມຣ | - | ຣ  | - | ມ  | ມ | ຮ  | ລ | ທ  | - | ລ  | - | ທ | - | ທ  | - | ລ  | - | ຟ | - | - | - | ມ  | - | - | - | ຣ  |
|   |   | ທຸ |   | ລຸ |   | ທຸ |   | ທຸ |   | ຮຸ |   | ທຸ |   | ຣ |   | ທຸ |   | ລຸ |   | ດ |   |   |   | ທຸ |   |   |   | ລຸ |

29
