# Supplementary material
Source: MDPI journal article supplement (https://www.mdpi.com/2306-5729/7/11/150)
Supplement: s1 [file s1]

## **Supplementary Materials**

**Title: Manual conversion of Sadhukarn to Thai and Western Music Notations and Their Translation into a Rhyme structure for music analysis.**

**Sumetus Eambangyung <sup>1\*</sup>, Gretel Schwörer – Kohl <sup>1</sup> and Witoon Purahong <sup>2</sup>**

<sup>1</sup> Institut für Musik, Medien- und Sprechwissenschaften (IMMS) Abteilung  
Musikwissenschaft, Martin – Luther – Universität Halle – Wittenberg, 06099 Halle (Saale),  
Germany

<sup>2</sup> Department of Soil Ecology, UFZ-Helmholtz Centre for Environmental Research,  
D-06120 Halle (Saale), Germany

\* Author to whom correspondence should be addressed.

**Supplementary File S4:** Look – Tok in different position of Sadhukarn main melody collected in Thailand, Cambodia, and Laos.

| The First Segment |        |                 |     |     |    |                   |     |     |   |                 |     |     |    |                |     |     |   |
|-------------------|--------|-----------------|-----|-----|----|-------------------|-----|-----|---|-----------------|-----|-----|----|----------------|-----|-----|---|
| No.               | Phrase | 1st Bonded Tone |     |     |    | 1st Branched Tone |     |     |   | 2nd Bonded Tone |     |     |    | Minor Look Tok |     |     |   |
|                   |        | 8th             | 4th | S   | A  | 8th               | 4th | S   | A | 8th             | 4th | S   | A  | 8th            | 4th | S   | A |
| 1                 | P0     | 0               | 22  | 3   | 0  | 1                 | 23  | 1   | 0 | 22              | 0   | 3   | 0  | 22             | 0   | 0   | 3 |
| 2                 | P1     | 0               | 17  | 8   | 0  | 3                 | 2   | 20  | 0 | 4               | 2   | 19  | 0  | 24             | 1   | 0   | 0 |
| 3                 | P2     | 2               | 0   | 23  | 0  | 4                 | 0   | 21  | 0 | 4               | 0   | 21  | 0  | 2              | 17  | 6   | 0 |
| 4                 | P3     | 22              | 0   | 3   | 0  | 1                 | 0   | 24  | 0 | 2               | 0   | 23  | 0  | 24             | 0   | 1   | 0 |
| 5                 | P4     | 1               | 1   | 23  | 0  | 1                 | 15  | 9   | 0 | 2               | 0   | 23  | 0  | 23             | 0   | 2   | 0 |
| 6                 | P5     | 4               | 6   | 14  | 0  | 7                 | 0   | 17  | 0 | 8               | 2   | 14  | 0  | 14             | 0   | 10  | 0 |
| 7                 | P6     | 17              | 0   | 7   | 0  | 4                 | 0   | 20  | 0 | 6               | 0   | 18  | 0  | 0              | 24  | 0   | 0 |
| 8                 | P7     | 1               | 13  | 7   | 3  | 6                 | 0   | 18  | 0 | 6               | 1   | 17  | 0  | 14             | 0   | 10  | 0 |
| 9                 | P8     | 0               | 1   | 23  | 0  | 0                 | 2   | 21  | 1 | 0               | 20  | 4   | 0  | 18             | 0   | 6   | 0 |
| 10                | P9     | 0               | 0   | 24  | 0  | 4                 | 0   | 20  | 0 | 3               | 0   | 21  | 0  | 19             | 3   | 2   | 0 |
| 11                | P10    | 3               | 0   | 21  | 0  | 1                 | 0   | 23  | 0 | 1               | 0   | 23  | 0  | 23             | 0   | 1   | 0 |
| 12                | P11    | 1               | 0   | 23  | 0  | 1                 | 13  | 10  | 0 | 1               | 0   | 23  | 0  | 22             | 0   | 2   | 0 |
| 13                | P12    | 1               | 0   | 23  | 0  | 0                 | 0   | 24  | 0 | 0               | 0   | 24  | 0  | 0              | 15  | 9   | 0 |
| 14                | P13    | 21              | 0   | 2   | 1  | 1                 | 0   | 23  | 0 | 2               | 0   | 22  | 0  | 20             | 1   | 3   | 0 |
| 15                | P14    | 1               | 1   | 22  | 0  | 1                 | 12  | 11  | 0 | 1               | 0   | 23  | 0  | 22             | 0   | 2   | 0 |
| 16                | P15    | 9               | 3   | 12  | 0  | 7                 | 0   | 17  | 0 | 13              | 1   | 10  | 0  | 14             | 0   | 10  | 0 |
| 17                | P16    | 2               | 0   | 21  | 1  | 14                | 0   | 10  | 0 | 14              | 0   | 10  | 0  | 14             | 4   | 6   | 0 |
| 18                | P17    | 1               | 12  | 8   | 3  | 3                 | 0   | 21  | 0 | 6               | 0   | 18  | 0  | 18             | 0   | 6   | 0 |
| 19                | P18    | 1               | 0   | 23  | 0  | 0                 | 1   | 23  | 0 | 0               | 0   | 24  | 0  | 0              | 1   | 23  | 0 |
| 20                | P19    | 0               | 0   | 22  | 0  | 0                 | 9   | 14  | 0 | 0               | 14  | 9   | 0  | 15             | 0   | 8   | 0 |
| 21                | P20    | 1               | 0   | 22  | 0  | 23                | 0   | 0   | 0 | 23              | 0   | 0   | 0  | 22             | 0   | 1   | 0 |
| 22                | P21    | 3               | 2   | 18  | 0  | 3                 | 3   | 17  | 0 | 4               | 1   | 18  | 0  | 19             | 0   | 4   | 0 |
| 23                | P22    | 4               | 0   | 19  | 0  | 0                 | 0   | 23  | 0 | 0               | 0   | 11  | 12 | 2              | 6   | 14  | 1 |
| 24                | P23    | 2               | 0   | 20  | 1  | 15                | 0   | 8   | 0 | 19              | 0   | 4   | 0  | 0              | 21  | 2   | 0 |
| 25                | P24    | 22              | 0   | 1   | 0  | 5                 | 9   | 9   | 0 | 1               | 1   | 21  | 0  | 21             | 0   | 2   | 0 |
| 26                | P25    | 0               | 0   | 23  | 0  | 2                 | 0   | 21  | 0 | 3               | 0   | 20  | 0  | 20             | 2   | 1   | 0 |
| 27                | P26    | 3               | 0   | 19  | 1  | 0                 | 2   | 21  | 0 | 0               | 3   | 20  | 0  | 4              | 6   | 13  | 0 |
| 28                | P27    | 2               | 1   | 20  | 0  | 21                | 0   | 2   | 0 | 19              | 0   | 4   | 0  | 19             | 2   | 2   | 0 |
| 29                | P28    | 1               | 0   | 21  | 0  | 20                | 0   | 2   | 0 | 20              | 0   | 2   | 0  | 12             | 9   | 1   | 0 |
| 30                | P29    | 0               | 0   | 21  | 0  | 0                 | 0   | 21  | 0 | 1               | 0   | 20  | 0  | 12             | 7   | 2   | 0 |
| 31                | P30    | 14              | 0   | 7   | 1  | 6                 | 1   | 15  | 0 | 3               | 0   | 19  | 0  | 17             | 2   | 3   | 0 |
| 32                | P31    | 23              | 0   | 0   | 0  | 2                 | 0   | 21  | 0 | 9               | 0   | 14  | 0  | 21             | 0   | 2   | 0 |
| 33                | P32    | 1               | 1   | 21  | 0  | 1                 | 14  | 8   | 0 | 6               | 0   | 17  | 0  | 23             | 0   | 0   | 0 |
| 34                | P33    | 1               | 15  | 1   | 0  | 3                 | 1   | 13  | 0 | 4               | 1   | 12  | 0  | 16             | 1   | 0   | 0 |
| 35                | P34    | 1               | 0   | 15  | 0  | 2                 | 0   | 14  | 0 | 3               | 0   | 13  | 0  | 0              | 10  | 6   | 0 |
| 36                | P35    | 16              | 0   | 0   | 0  | 1                 | 0   | 15  | 0 | 1               | 0   | 15  | 0  | 16             | 0   | 0   | 0 |
| 37                | P36    | 1               | 0   | 15  | 0  | 1                 | 9   | 6   | 0 | 1               | 0   | 15  | 0  | 15             | 0   | 1   | 0 |
| 38                | P37    | 0               | 6   | 10  | 0  | 3                 | 0   | 13  | 0 | 2               | 1   | 13  | 0  | 9              | 0   | 7   | 0 |
| 39                | P38    | 14              | 0   | 2   | 0  | 1                 | 0   | 15  | 0 | 2               | 0   | 14  | 0  | 0              | 16  | 0   | 0 |
| 40                | P39    | 1               | 8   | 4   | 3  | 5                 | 0   | 11  | 0 | 5               | 1   | 10  | 0  | 12             | 0   | 4   | 0 |
| 41                | P40    | 0               | 1   | 15  | 0  | 0                 | 0   | 16  | 0 | 0               | 15  | 1   | 0  | 11             | 0   | 5   | 0 |
| 42                | P41    | 0               | 0   | 16  | 0  | 0                 | 0   | 16  | 0 | 1               | 0   | 15  | 0  | 16             | 0   | 0   | 0 |
| 43                | P42    | 1               | 0   | 15  | 0  | 1                 | 0   | 15  | 0 | 1               | 0   | 15  | 0  | 16             | 0   | 0   | 0 |
| 44                | P43    | 1               | 0   | 15  | 0  | 1                 | 9   | 6   | 0 | 1               | 0   | 15  | 0  | 15             | 0   | 1   | 0 |
| 45                | P44    | 0               | 0   | 16  | 0  | 0                 | 0   | 16  | 0 | 0               | 0   | 16  | 0  | 0              | 8   | 8   | 0 |
| 46                | P45    | 16              | 0   | 0   | 0  | 1                 | 0   | 15  | 0 | 1               | 0   | 15  | 0  | 16             | 0   | 0   | 0 |
| 47                | P46    | 1               | 0   | 15  | 0  | 1                 | 8   | 7   | 0 | 1               | 0   | 15  | 0  | 15             | 0   | 1   | 0 |
| 48                | P47    | 6               | 2   | 8   | 0  | 2                 | 0   | 14  | 0 | 9               | 0   | 7   | 0  | 8              | 0   | 8   | 0 |
| 49                | P48    | 0               | 0   | 16  | 0  | 8                 | 0   | 8   | 0 | 8               | 0   | 8   | 0  | 8              | 3   | 5   | 0 |
| 50                | P49    | 0               | 8   | 5   | 3  | 2                 | 0   | 14  | 0 | 5               | 0   | 11  | 0  | 13             | 0   | 3   | 0 |
| 51                | P50    | 0               | 0   | 16  | 0  | 0                 | 0   | 16  | 0 | 0               | 0   | 16  | 0  | 0              | 0   | 16  | 0 |
| 52                | P51    | 3               | 0   | 13  | 0  | 15                | 0   | 1   | 0 | 16              | 0   | 0   | 0  | 15             | 0   | 1   | 0 |
| 53                | P52    | 0               | 0   | 16  | 0  | 0                 | 0   | 16  | 0 | 0               | 0   | 16  | 0  | 0              | 8   | 8   | 0 |
| 54                | P53    | 16              | 0   | 0   | 0  | 1                 | 0   | 15  | 0 | 1               | 0   | 15  | 0  | 16             | 0   | 0   | 0 |
| 55                | P54    | 0               | 8   | 8   | 0  | 0                 | 11  | 5   | 0 | 9               | 0   | 7   | 0  | 16             | 0   | 0   | 0 |
| Total             |        | 241             | 128 | 745 | 17 | 205               | 144 | 782 | 1 | 274             | 63  | 783 | 12 | 733            | 167 | 228 | 4 |

8th = Octave  
4th = 4th interval  
S = Singel hand Strike  
A = Alternative intervals

| The second Segment |        |                 |     |     |    |                   |     |     |   |                 |     |     |   |                |     |    |   |
|--------------------|--------|-----------------|-----|-----|----|-------------------|-----|-----|---|-----------------|-----|-----|---|----------------|-----|----|---|
| No.                | Phrase | 3rd Bonded Tone |     |     |    | 2nd Branched Tone |     |     |   | 4th Bonded Tone |     |     |   | Major Look Tok |     |    |   |
|                    |        | 8th             | 4th | S   | A  | 8th               | 4th | S   | A | 8th             | 4th | S   | A | 8th            | 4th | S  | A |
| 1                  | P0     | 10              | 5   | 9   | 0  | 2                 | 2   | 21  | 0 | 11              | 1   | 13  | 0 | 3              | 21  | 1  | 0 |
| 2                  | P1     | 22              | 0   | 3   | 0  | 1                 | 0   | 24  | 0 | 1               | 0   | 24  | 0 | 11             | 13  | 1  | 0 |
| 3                  | P2     | 7               | 0   | 18  | 0  | 13                | 3   | 9   | 0 | 3               | 5   | 17  | 0 | 22             | 0   | 3  | 0 |
| 4                  | P3     | 9               | 0   | 16  | 0  | 20                | 0   | 5   | 0 | 18              | 0   | 7   | 0 | 24             | 0   | 1  | 0 |
| 5                  | P4     | 16              | 0   | 7   | 2  | 1                 | 0   | 24  | 0 | 1               | 0   | 24  | 0 | 0              | 25  | 0  | 0 |
| 6                  | P5     | 1               | 0   | 23  | 0  | 23                | 0   | 1   | 0 | 20              | 0   | 3   | 1 | 24             | 0   | 0  | 0 |
| 7                  | P6     | 0               | 1   | 23  | 0  | 0                 | 7   | 17  | 0 | 2               | 0   | 22  | 0 | 22             | 0   | 2  | 0 |
| 8                  | P7     | 21              | 0   | 1   | 2  | 2                 | 0   | 22  | 0 | 2               | 0   | 22  | 0 | 16             | 7   | 1  | 0 |
| 9                  | P8     | 8               | 0   | 16  | 0  | 9                 | 0   | 15  | 0 | 9               | 0   | 15  | 0 | 22             | 0   | 2  | 0 |
| 10                 | P9     | 0               | 0   | 18  | 6  | 1                 | 0   | 23  | 0 | 1               | 0   | 23  | 0 | 21             | 0   | 3  | 0 |
| 11                 | P10    | 10              | 0   | 14  | 0  | 21                | 0   | 3   | 0 | 17              | 0   | 7   | 0 | 23             | 0   | 1  | 0 |
| 12                 | P11    | 16              | 0   | 8   | 0  | 0                 | 0   | 24  | 0 | 0               | 0   | 24  | 0 | 0              | 24  | 0  | 0 |
| 13                 | P12    | 10              | 0   | 14  | 0  | 13                | 7   | 4   | 0 | 2               | 5   | 16  | 1 | 22             | 0   | 2  | 0 |
| 14                 | P13    | 9               | 0   | 15  | 0  | 20                | 0   | 4   | 0 | 16              | 0   | 8   | 0 | 22             | 0   | 2  | 0 |
| 15                 | P14    | 17              | 0   | 6   | 1  | 0                 | 0   | 24  | 0 | 1               | 0   | 23  | 0 | 0              | 24  | 0  | 0 |
| 16                 | P15    | 13              | 0   | 11  | 0  | 3                 | 0   | 21  | 0 | 3               | 0   | 21  | 0 | 13             | 5   | 5  | 1 |
| 17                 | P16    | 2               | 0   | 22  | 0  | 2                 | 12  | 10  | 0 | 2               | 0   | 22  | 0 | 17             | 6   | 1  | 0 |
| 18                 | P17    | 22              | 0   | 1   | 1  | 2                 | 0   | 22  | 0 | 2               | 0   | 22  | 0 | 20             | 2   | 2  | 0 |
| 19                 | P18    | 0               | 0   | 24  | 0  | 0                 | 1   | 23  | 0 | 0               | 3   | 21  | 0 | 14             | 10  | 0  | 0 |
| 20                 | P19    | 6               | 0   | 17  | 0  | 8                 | 0   | 15  | 0 | 8               | 0   | 15  | 0 | 22             | 0   | 1  | 0 |
| 21                 | P20    | 21              | 0   | 2   | 0  | 5                 | 0   | 18  | 0 | 5               | 0   | 18  | 0 | 21             | 0   | 2  | 0 |
| 22                 | P21    | 12              | 0   | 11  | 0  | 17                | 0   | 6   | 0 | 18              | 0   | 5   | 0 | 22             | 0   | 1  | 0 |
| 23                 | P22    | 0               | 0   | 23  | 0  | 0                 | 12  | 11  | 0 | 0               | 1   | 22  | 0 | 23             | 0   | 0  | 0 |
| 24                 | P23    | 0               | 1   | 22  | 0  | 0                 | 8   | 15  | 0 | 1               | 0   | 22  | 0 | 22             | 0   | 1  | 0 |
| 25                 | P24    | 4               | 14  | 3   | 2  | 6                 | 0   | 17  | 0 | 4               | 2   | 17  | 0 | 7              | 2   | 14 | 0 |
| 26                 | P25    | 0               | 0   | 22  | 1  | 1                 | 0   | 22  | 0 | 1               | 0   | 22  | 0 | 2              | 3   | 18 | 0 |
| 27                 | P26    | 21              | 0   | 2   | 0  | 0                 | 0   | 23  | 0 | 0               | 0   | 23  | 0 | 2              | 20  | 1  | 0 |
| 28                 | P27    | 5               | 0   | 17  | 1  | 9                 | 0   | 13  | 1 | 9               | 0   | 14  | 0 | 3              | 8   | 12 | 0 |
| 29                 | P28    | 13              | 2   | 7   | 0  | 1                 | 3   | 18  | 0 | 1               | 3   | 17  | 1 | 4              | 17  | 1  | 0 |
| 30                 | P29    | 0               | 0   | 21  | 1  | 1                 | 0   | 21  | 0 | 1               | 0   | 21  | 0 | 18             | 0   | 4  | 0 |
| 31                 | P30    | 0               | 0   | 22  | 0  | 1                 | 0   | 21  | 0 | 2               | 1   | 19  | 0 | 5              | 10  | 7  | 0 |
| 32                 | P31    | 9               | 0   | 14  | 0  | 20                | 0   | 3   | 0 | 16              | 0   | 7   | 0 | 23             | 0   | 0  | 0 |
| 33                 | P32    | 20              | 0   | 3   | 0  | 5                 | 6   | 11  | 1 | 5               | 5   | 13  | 0 | 18             | 5   | 0  | 0 |
| 34                 | P33    | 16              | 0   | 0   | 0  | 1                 | 0   | 15  | 0 | 1               | 0   | 15  | 0 | 11             | 5   | 0  | 0 |
| 35                 | P34    | 3               | 0   | 13  | 0  | 8                 | 3   | 5   | 0 | 1               | 5   | 10  | 0 | 16             | 0   | 0  | 0 |
| 36                 | P35    | 6               | 0   | 10  | 0  | 15                | 0   | 1   | 0 | 10              | 0   | 6   | 0 | 16             | 0   | 0  | 0 |
| 37                 | P36    | 13              | 0   | 3   | 0  | 0                 | 0   | 16  | 0 | 0               | 0   | 16  | 0 | 0              | 16  | 0  | 0 |
| 38                 | P37    | 1               | 0   | 15  | 0  | 15                | 0   | 1   | 0 | 15              | 0   | 1   | 0 | 16             | 0   | 0  | 0 |
| 39                 | P38    | 0               | 0   | 16  | 0  | 0                 | 1   | 15  | 0 | 1               | 0   | 15  | 0 | 16             | 0   | 0  | 0 |
| 40                 | P39    | 16              | 0   | 0   | 0  | 1                 | 0   | 15  | 0 | 1               | 0   | 15  | 0 | 16             | 0   | 0  | 0 |
| 41                 | P40    | 3               | 0   | 13  | 0  | 6                 | 0   | 10  | 0 | 6               | 0   | 10  | 0 | 16             | 0   | 0  | 0 |
| 42                 | P41    | 0               | 0   | 10  | 6  | 1                 | 0   | 15  | 0 | 1               | 0   | 15  | 0 | 16             | 0   | 0  | 0 |
| 43                 | P42    | 6               | 0   | 10  | 0  | 15                | 0   | 1   | 0 | 10              | 0   | 6   | 0 | 16             | 0   | 0  | 0 |
| 44                 | P43    | 13              | 0   | 3   | 0  | 0                 | 0   | 16  | 0 | 0               | 0   | 16  | 0 | 0              | 16  | 0  | 0 |
| 45                 | P44    | 6               | 0   | 10  | 0  | 8                 | 6   | 2   | 0 | 1               | 5   | 10  | 0 | 16             | 0   | 0  | 0 |
| 46                 | P45    | 6               | 0   | 10  | 0  | 15                | 0   | 1   | 0 | 10              | 0   | 6   | 0 | 16             | 0   | 0  | 0 |
| 47                 | P46    | 13              | 0   | 3   | 0  | 0                 | 0   | 16  | 0 | 0               | 0   | 16  | 0 | 0              | 16  | 0  | 0 |
| 48                 | P47    | 10              | 0   | 6   | 0  | 3                 | 0   | 13  | 0 | 3               | 0   | 13  | 0 | 12             | 2   | 2  | 0 |
| 49                 | P48    | 1               | 0   | 15  | 0  | 0                 | 10  | 6   | 0 | 0               | 0   | 16  | 0 | 16             | 0   | 0  | 0 |
| 50                 | P49    | 16              | 0   | 0   | 0  | 1                 | 0   | 15  | 0 | 0               | 0   | 16  | 0 | 16             | 0   | 0  | 0 |
| 51                 | P50    | 0               | 0   | 16  | 0  | 0                 | 0   | 16  | 0 | 0               | 2   | 14  | 0 | 13             | 3   | 0  | 0 |
| 52                 | P51    | 15              | 0   | 1   | 0  | 0                 | 0   | 16  | 0 | 0               | 0   | 16  | 0 | 0              | 16  | 0  | 0 |
| 53                 | P52    | 8               | 0   | 8   | 0  | 6                 | 5   | 5   | 0 | 1               | 3   | 12  | 0 | 16             | 0   | 0  | 0 |
| 54                 | P53    | 6               | 0   | 10  | 0  | 15                | 0   | 1   | 0 | 10              | 0   | 6   | 0 | 16             | 0   | 0  | 0 |
| 55                 | P54    | 14              | 0   | 2   | 0  | 7                 | 6   | 3   | 0 | 7               | 6   | 3   | 0 | 10             | 6   | 0  | 0 |
| Total              |        | 476             | 23  | 609 | 23 | 324               | 92  | 714 | 2 | 260             | 47  | 822 | 3 | 758            | 282 | 91 | 1 |

8th = Octave  
4th = 4th interval  
S = Singel hand Strike  
A = Alternative intervals

| Overall Summary |        |      |     |      |    |
|-----------------|--------|------|-----|------|----|
| No.             | Phrase | 8th  | 4th | S    | A  |
| 1               | P0     | 71   | 74  | 51   | 3  |
| 2               | P1     | 66   | 35  | 99   | 0  |
| 3               | P2     | 57   | 25  | 118  | 0  |
| 4               | P3     | 120  | 0   | 80   | 0  |
| 5               | P4     | 45   | 41  | 112  | 2  |
| 6               | P5     | 101  | 8   | 82   | 1  |
| 7               | P6     | 51   | 32  | 109  | 0  |
| 8               | P7     | 68   | 21  | 98   | 5  |
| 9               | P8     | 66   | 23  | 102  | 1  |
| 10              | P9     | 49   | 3   | 134  | 6  |
| 11              | P10    | 99   | 0   | 93   | 0  |
| 12              | P11    | 41   | 37  | 114  | 0  |
| 13              | P12    | 48   | 27  | 116  | 1  |
| 14              | P13    | 111  | 1   | 79   | 1  |
| 15              | P14    | 43   | 37  | 111  | 1  |
| 16              | P15    | 75   | 9   | 107  | 1  |
| 17              | P16    | 67   | 22  | 102  | 1  |
| 18              | P17    | 74   | 14  | 100  | 4  |
| 19              | P18    | 15   | 16  | 161  | 0  |
| 20              | P19    | 59   | 23  | 101  | 0  |
| 21              | P20    | 121  | 0   | 63   | 0  |
| 22              | P21    | 98   | 6   | 80   | 0  |
| 23              | P22    | 29   | 19  | 123  | 13 |
| 24              | P23    | 59   | 30  | 94   | 1  |
| 25              | P24    | 70   | 28  | 84   | 2  |
| 26              | P25    | 29   | 5   | 149  | 1  |
| 27              | P26    | 30   | 31  | 122  | 1  |
| 28              | P27    | 87   | 11  | 84   | 2  |
| 29              | P28    | 72   | 34  | 69   | 1  |
| 30              | P29    | 33   | 7   | 131  | 1  |
| 31              | P30    | 48   | 14  | 113  | 1  |
| 32              | P31    | 123  | 0   | 61   | 0  |
| 33              | P32    | 79   | 31  | 73   | 1  |
| 34              | P33    | 53   | 23  | 56   | 0  |
| 35              | P34    | 34   | 18  | 76   | 0  |
| 36              | P35    | 81   | 0   | 47   | 0  |
| 37              | P36    | 31   | 25  | 72   | 0  |
| 38              | P37    | 61   | 7   | 60   | 0  |
| 39              | P38    | 34   | 17  | 77   | 0  |
| 40              | P39    | 57   | 9   | 59   | 3  |
| 41              | P40    | 42   | 16  | 70   | 0  |
| 42              | P41    | 35   | 0   | 87   | 6  |
| 43              | P42    | 66   | 0   | 62   | 0  |
| 44              | P43    | 31   | 25  | 72   | 0  |
| 45              | P44    | 31   | 19  | 78   | 0  |
| 46              | P45    | 81   | 0   | 47   | 0  |
| 47              | P46    | 31   | 24  | 73   | 0  |
| 48              | P47    | 53   | 4   | 71   | 0  |
| 49              | P 48   | 41   | 13  | 74   | 0  |
| 50              | P49    | 53   | 8   | 64   | 3  |
| 51              | P50    | 13   | 5   | 110  | 0  |
| 52              | P51    | 64   | 16  | 48   | 0  |
| 53              | P52    | 31   | 16  | 81   | 0  |
| 54              | P53    | 81   | 0   | 47   | 0  |
| 55              | P54    | 63   | 37  | 28   | 0  |
| Total           |        | 3271 | 946 | 4474 | 63 |

8th = Octave  
4th = 4th interval  
S = Singel hand Strike  
A = Alternative intervals
